# Supplementary material for: Sexual Transcription Differences in Brachymeria lasus (Hymenoptera: Chalcididae), a Pupal Parasitoid Species of Lymantria dispar (Lepidoptera: Lymantriidae)
Source: Front Genet. 2019 Mar 5;10:172. doi: 10.3389/fgene.2019.00172 (PMC6411638; doi:10.3389/fgene.2019.00172)
Supplement: Supplementary file 1 [file Data_Sheet_1.ZIP]

Archive with 9 entries (8 files):
- Supplementary/
- Supplementary/Figure S1.docx
- Supplementary/Supplementary for Raw data of Q-PCR.eds
- Supplementary/Supplementary for Result of Q-PCR.xls
- Supplementary/Table S1.xlsx
- Supplementary/Table S2.docx
- Supplementary/Table S3.xlsx
- Supplementary/Table S4.xlsx
- Supplementary/Table S5.xlsx
