# Supplementary material for: Sexual Transcription Differences in Brachymeria lasus (Hymenoptera: Chalcididae), a Pupal Parasitoid Species of Lymantria dispar (Lepidoptera: Lymantriidae)
Source: Front Genet. 2019 Mar 5;10:172. doi: 10.3389/fgene.2019.00172 (PMC6411638; doi:10.3389/fgene.2019.00172)
Supplement: Supplementary file 1 [file Data_Sheet_1.ZIP › Supplementary/Supplementary for Result of Q-PCR.xls]

## Sheet: Results
Block Type	96well
Chemistry	SYBR_GREEN
Experiment File Name	C:\Users\Administrator\Desktop\trp.eds
Experiment Run End Time	Not Started
Instrument Type	steponeplus
Passive Reference	ROX
Well	Sample Name	Target Name	Task	Reporter	Quencher	RQ	RQ Min	RQ Max	Cт	Cт Mean	Cт SD	ΔCт	ΔCт Mean	ΔCт SE	HK Control ΔCт Mean	HK Control ΔCт SE	ΔΔCт	Automatic Ct Threshold	Ct Threshold	Automatic Baseline	Baseline Start	Baseline End	Efficiency	Tm1	Tm2	Tm3	Comments	HIGHSD	NOISE	SPIKE	OUTLIERRG	CTFAIL	MTP
A1	male-1	GAPDH	UNKNOWN	SYBR	None				21.8508	21.7169	0.120313							TRUE	0.580565	TRUE	3	15	1	84.3664				N	N	N	N	N	N
A2	male-1	GAPDH	UNKNOWN	SYBR	None				21.6177	21.7169	0.120313							TRUE	0.580565	TRUE	3	15	1	84.3664				N	N	N	N	N	N
A3	male-1	GAPDH	UNKNOWN	SYBR	None				21.6823	21.7169	0.120313							TRUE	0.580565	TRUE	3	15	1	84.5227				N	N	N	N	N	N
A4	male-1	trp	UNKNOWN	SYBR	None	1	0.800407	1.24936	25.1896	25.0601	0.160232		3.34316	0.115686			0	TRUE	0.2	TRUE	3	15	1					N	N	N	N	N	N
A5	male-1	trp	UNKNOWN	SYBR	None	1	0.800407	1.24936	24.8809	25.0601	0.160232		3.34316	0.115686			0	TRUE	0.2	TRUE	3	15	1					N	N	N	N	N	N
A6	male-1	trp	UNKNOWN	SYBR	None	1	0.800407	1.24936	25.1098	25.0601	0.160232		3.34316	0.115686			0	TRUE	0.2	TRUE	3	15	1					N	N	N	N	N	N
B1	male-2	GAPDH	UNKNOWN	SYBR	None				20.243	20.0796	0.141546							TRUE	0.580565	TRUE	3	13	1	84.3664				N	N	N	N	N	N
B2	male-2	GAPDH	UNKNOWN	SYBR	None				20.0004	20.0796	0.141546							TRUE	0.580565	TRUE	3	14	1	84.3664				N	N	N	N	N	N
B3	male-2	GAPDH	UNKNOWN	SYBR	None				19.9954	20.0796	0.141546							TRUE	0.580565	TRUE	3	13	1	84.3735				N	N	N	N	N	N
B4	male-2	trp	UNKNOWN	SYBR	None	1.2194	1.00144	1.48481	23.1913	23.1366	0.10666		3.05699	0.102325			-0.286175	TRUE	0.2	TRUE	3	15	1					N	N	N	N	N	N
B5	male-2	trp	UNKNOWN	SYBR	None	1.2194	1.00144	1.48481	23.0137	23.1366	0.10666		3.05699	0.102325			-0.286175	TRUE	0.2	TRUE	3	15	1					N	N	N	N	N	N
B6	male-2	trp	UNKNOWN	SYBR	None	1.2194	1.00144	1.48481	23.2049	23.1366	0.10666		3.05699	0.102325			-0.286175	TRUE	0.2	TRUE	3	15	1					N	N	N	N	N	N
C1	male-3	GAPDH	UNKNOWN	SYBR	None				19.9571	19.9345	0.019935							TRUE	0.580565	TRUE	3	13	1	84.5155				N	N	N	N	N	N
C2	male-3	GAPDH	UNKNOWN	SYBR	None				19.9195	19.9345	0.019935							TRUE	0.580565	TRUE	3	13	1	84.3664				N	N	N	N	N	N
C3	male-3	GAPDH	UNKNOWN	SYBR	None				19.927	19.9345	0.019935							TRUE	0.580565	TRUE	3	13	1	84.5227				N	N	N	N	N	N
C4	male-3	trp	UNKNOWN	SYBR	None	1.3853	1.19599	1.60456	22.954	22.8075	0.130731		2.87297	0.0763503			-0.470194	TRUE	0.2	TRUE	3	15	1					N	N	N	N	N	N
C5	male-3	trp	UNKNOWN	SYBR	None	1.3853	1.19599	1.60456	22.7656	22.8075	0.130731		2.87297	0.0763503			-0.470194	TRUE	0.2	TRUE	3	15	1					N	N	N	N	N	N
C6	male-3	trp	UNKNOWN	SYBR	None	1.3853	1.19599	1.60456	22.7029	22.8075	0.130731		2.87297	0.0763503			-0.470194	TRUE	0.2	TRUE	3	15	1					N	N	N	N	N	N
D1	male-4	GAPDH	UNKNOWN	SYBR	None				19.6358	19.6335	0.0788675							TRUE	0.580565	TRUE	3	13	1	84.5155				N	N	N	N	N	N
D2	male-4	GAPDH	UNKNOWN	SYBR	None				19.5536	19.6335	0.0788675							TRUE	0.580565	TRUE	3	13	1	84.3664				N	N	N	N	N	N
D3	male-4	GAPDH	UNKNOWN	SYBR	None				19.7113	19.6335	0.0788675							TRUE	0.580565	TRUE	3	13	1	84.3735				N	N	N	N	N	N
D4	male-4	trp	UNKNOWN	SYBR	None	0.725735	0.555378	0.948346	23.6977	23.4392	0.227501		3.80565	0.139016			0.462486	TRUE	0.2	TRUE	3	15	1					N	N	N	N	N	N
D5	male-4	trp	UNKNOWN	SYBR	None	0.725735	0.555378	0.948346	23.3502	23.4392	0.227501		3.80565	0.139016			0.462486	TRUE	0.2	TRUE	3	15	1					N	N	N	N	N	N
D6	male-4	trp	UNKNOWN	SYBR	None	0.725735	0.555378	0.948346	23.2697	23.4392	0.227501		3.80565	0.139016			0.462486	TRUE	0.2	TRUE	3	15	1					N	N	N	N	N	N
E1	female-1	GAPDH	UNKNOWN	SYBR	None				23.7675	23.8484	0.0945451							TRUE	0.580565	TRUE	3	17	1	84.3664				N	N	N	N	N	N
E2	female-1	GAPDH	UNKNOWN	SYBR	None				23.9524	23.8484	0.0945451							TRUE	0.580565	TRUE	3	17	1	84.3664				N	N	N	N	N	N
E3	female-1	GAPDH	UNKNOWN	SYBR	None				23.8254	23.8484	0.0945451							TRUE	0.580565	TRUE	3	17	1	84.3735				N	N	N	N	N	N
E4	female-1	trp	UNKNOWN	SYBR	None	2.11139	1.56891	2.84144	25.8432	26.1134	0.249991		2.26497	0.15431			-1.07819	TRUE	0.2	TRUE	3	15	1					N	N	N	N	N	N
E5	female-1	trp	UNKNOWN	SYBR	None	2.11139	1.56891	2.84144	26.3365	26.1134	0.249991		2.26497	0.15431			-1.07819	TRUE	0.2	TRUE	3	15	1					N	N	N	N	N	N
E6	female-1	trp	UNKNOWN	SYBR	None	2.11139	1.56891	2.84144	26.1606	26.1134	0.249991		2.26497	0.15431			-1.07819	TRUE	0.2	TRUE	3	15	1					N	N	N	N	N	N
F1	feamle-2	GAPDH	UNKNOWN	SYBR	None				20.7207	20.6692	0.0650743							TRUE	0.580565	TRUE	3	14	1	84.5155				N	N	N	N	N	N
F2	feamle-2	GAPDH	UNKNOWN	SYBR	None				20.5961	20.6692	0.0650743							TRUE	0.580565	TRUE	3	14	1	84.5155				N	N	N	N	N	N
F3	feamle-2	GAPDH	UNKNOWN	SYBR	None				20.6908	20.6692	0.0650743							TRUE	0.580565	TRUE	3	14	1	84.3735				N	N	N	N	N	N
F4	feamle-2	trp	UNKNOWN	SYBR	None	3.01585	2.72993	3.33171	22.3895	22.4198	0.0616575		1.7506	0.0517568			-1.59256	TRUE	0.2	TRUE	3	15	1					N	N	N	N	N	N
F5	feamle-2	trp	UNKNOWN	SYBR	None	3.01585	2.72993	3.33171	22.3792	22.4198	0.0616575		1.7506	0.0517568			-1.59256	TRUE	0.2	TRUE	3	15	1					N	N	N	N	N	N
F6	feamle-2	trp	UNKNOWN	SYBR	None	3.01585	2.72993	3.33171	22.4907	22.4198	0.0616575		1.7506	0.0517568			-1.59256	TRUE	0.2	TRUE	3	15	1					N	N	N	N	N	N
G1	female-3	GAPDH	UNKNOWN	SYBR	None				18.9746	18.8298	0.167899							TRUE	0.580565	TRUE	3	12	1	84.5155				N	N	N	N	N	N
G2	female-3	GAPDH	UNKNOWN	SYBR	None				18.6457	18.8298	0.167899							TRUE	0.580565	TRUE	3	12	1	84.5155				N	N	N	N	N	N
G3	female-3	GAPDH	UNKNOWN	SYBR	None				18.869	18.8298	0.167899							TRUE	0.580565	TRUE	3	12	1	84.5227				N	N	N	N	N	N
G4	female-3	trp	UNKNOWN	SYBR	None	2.11699	1.69372	2.64605	21.1916	21.0909	0.110073		2.26114	0.115911			-1.08202	TRUE	0.2	TRUE	3	15	1					N	N	N	N	N	N
G5	female-3	trp	UNKNOWN	SYBR	None	2.11699	1.69372	2.64605	20.9734	21.0909	0.110073		2.26114	0.115911			-1.08202	TRUE	0.2	TRUE	3	15	1					N	N	N	N	N	N
G6	female-3	trp	UNKNOWN	SYBR	None	2.11699	1.69372	2.64605	21.1077	21.0909	0.110073		2.26114	0.115911			-1.08202	TRUE	0.2	TRUE	3	15	1					N	N	N	N	N	N
H1	female-4	GAPDH	UNKNOWN	SYBR	None				19.4466	19.3833	0.0628013							TRUE	0.580565	TRUE	3	13	1	84.6647				N	N	N	N	N	N
H2	female-4	GAPDH	UNKNOWN	SYBR	None				19.321	19.3833	0.0628013							TRUE	0.580565	TRUE	3	13	1	84.5155				N	N	N	N	N	N
H3	female-4	GAPDH	UNKNOWN	SYBR	None				19.3823	19.3833	0.0628013							TRUE	0.580565	TRUE	3	13	1	84.5227				N	N	N	N	N	N
H4	female-4	trp	UNKNOWN	SYBR	None	1.48024	1.32228	1.65706	22.1163	22.1606	0.0798132		2.77733	0.0586349			-0.565828	TRUE	0.2	TRUE	3	15	1					N	N	N	N	N	N
H5	female-4	trp	UNKNOWN	SYBR	None	1.48024	1.32228	1.65706	22.1128	22.1606	0.0798132		2.77733	0.0586349			-0.565828	TRUE	0.2	TRUE	3	15	1					N	N	N	N	N	N
H6	female-4	trp	UNKNOWN	SYBR	None	1.48024	1.32228	1.65706	22.2528	22.1606	0.0798132		2.77733	0.0586349			-0.565828	TRUE	0.2	TRUE	3	15	1					N	N	N	N	N	N
Analysis Type	Singleplex
Endogenous Control	GAPDH
RQ Min/Max Confidence Level	95.0
Reference Sample	Sample 1
