# Supplementary material for: Sexual Transcription Differences in Brachymeria lasus (Hymenoptera: Chalcididae), a Pupal Parasitoid Species of Lymantria dispar (Lepidoptera: Lymantriidae)
Source: Front Genet. 2019 Mar 5;10:172. doi: 10.3389/fgene.2019.00172 (PMC6411638; doi:10.3389/fgene.2019.00172)
Supplement: Supplementary file 1 [file Data_Sheet_1.ZIP › Supplementary/Table S1.xlsx]

## Sheet: Sheet1
	qPCR primer
Gene	F	R
trp	CGAGTACCTCGCAATCGAAC	CGAGTAGTCCATCAGCCCAT
GAPDH	ATGGCCGTGGTGCTCAACAA	AGGACCTTCAGCTGCCTCCT
