# Supplementary material for: Sexual Transcription Differences in Brachymeria lasus (Hymenoptera: Chalcididae), a Pupal Parasitoid Species of Lymantria dispar (Lepidoptera: Lymantriidae)
Source: Front Genet. 2019 Mar 5;10:172. doi: 10.3389/fgene.2019.00172 (PMC6411638; doi:10.3389/fgene.2019.00172)
Supplement: Supplementary file 1 [file Data_Sheet_1.ZIP › Supplementary/Table S3.xlsx]

## Sheet: Additional file 2
#GO_classify1	GO_classify2	Unigene number
#Total_gene		17248
cellular component	extracellular region	230
cellular component	collagen trimer	7
cellular component	cell	5191
cellular component	nucleoid	6
cellular component	membrane	2557
cellular component	virion	13
cellular component	cell junction	101
cellular component	extracellular matrix	43
cellular component	membrane-enclosed lumen	363
cellular component	macromolecular complex	2567
cellular component	organelle	3545
cellular component	extracellular matrix part	6
cellular component	extracellular region part	69
cellular component	organelle part	1696
cellular component	virion part	13
cellular component	membrane part	1776
cellular component	synapse part	102
cellular component	cell part	5188
cellular component	synapse	120
molecular function	protein binding transcription factor activity	69
molecular function	nucleic acid binding transcription factor activity	300
molecular function	catalytic activity	9797
molecular function	receptor activity	257
molecular function	guanyl-nucleotide exchange factor activity	74
molecular function	structural molecule activity	740
molecular function	transporter activity	997
molecular function	binding	8810
molecular function	electron carrier activity	217
molecular function	morphogen activity	1
molecular function	antioxidant activity	85
molecular function	channel regulator activity	1
molecular function	metallochaperone activity	4
molecular function	enzyme regulator activity	256
molecular function	protein tag	1
molecular function	translation regulator activity	5
molecular function	molecular transducer activity	336
biological process	reproduction	430
biological process	cell killing	1
biological process	immune system process	105
biological process	metabolic process	11913
biological process	cellular process	8702
biological process	reproductive process	362
biological process	biological adhesion	190
biological process	signaling	1040
biological process	multicellular organismal process	1305
biological process	developmental process	1260
biological process	growth	190
biological process	locomotion	316
biological process	single-organism process	7027
biological process	biological phase	6
biological process	rhythmic process	15
biological process	response to stimulus	1602
biological process	localization	2257
biological process	multi-organism process	340
biological process	biological regulation	2622
biological process	cellular component organization or biogenesis	1289
