# Supplementary material for: Sexual Transcription Differences in Brachymeria lasus (Hymenoptera: Chalcididae), a Pupal Parasitoid Species of Lymantria dispar (Lepidoptera: Lymantriidae)
Source: Front Genet. 2019 Mar 5;10:172. doi: 10.3389/fgene.2019.00172 (PMC6411638; doi:10.3389/fgene.2019.00172)
Supplement: Supplementary file 1 [file Data_Sheet_1.ZIP › Supplementary/Table S4.xlsx]

## Sheet: Kegg.pathway
#pathway	pathway_id	Gene_number	Gene_id	KOs
Ribosome	ko03010	625	c100000.graph_c0;c100325.graph_c1;c100906.graph_c3;c100951.graph_c1;c101639.graph_c1;c102109.graph_c0;c102469.graph_c1;c102469.graph_c2;c102543.graph_c0;c102607.graph_c0;c102951.graph_c0;c103400.graph_c0;c105823.graph_c0;c107365.graph_c0;c107433.graph_c0;c10871.graph_c0;c108874.graph_c0;c108876.graph_c0;c108877.graph_c0;c108957.graph_c0;c109059.graph_c0;c109069.graph_c0;c109075.graph_c0;c109078.g…	K02935+K02971+K02880+K02932+K02997+K02984+K02985+K02985+K02917+K02936+K02930+K02892+K02943+K02884+K02896+K02937+K02891+K02969+K02905+K02913+K02883+K02894+K02893+K02984+K02918+K02900+K02898+K02912+K02908+K02975+K02921+K02923+K02903+K02964+K02870+K02893+K02958+K02929+K02893+K02894+K02989+K02943+K02923+K02918+K02971+K02921+K02896+K02974+K02926+K02899+K02908+K02990+K02870+K02958+K02865+K02879+K02925+…
Carbon metabolism	ko01200	608	c100007.graph_c0;c100108.graph_c0;c100291.graph_c0;c100320.graph_c0;c100325.graph_c0;c100496.graph_c0;c100799.graph_c0;c100931.graph_c0;c101092.graph_c0;c101093.graph_c0;c101379.graph_c0;c101389.graph_c0;c101715.graph_c0;c101876.graph_c1;c101909.graph_c0;c101972.graph_c0;c101981.graph_c0;c102014.graph_c0;c102014.graph_c1;c102454.graph_c0;c102496.graph_c0;c102533.graph_c0;c102790.graph_c0;c102896.…	K00844+K00030+K00616+K07511+K00927+K00025+K00026+K01070+K01899+K00600+K01679+K00162+K01623+K00036+K00382+K01647+K00031+K00234+K00234+K00036+K00600+K00658+K00626+K01895+K01895+K01681+K01810+K00234+K00627+K00627+K00814+K00140+K00164+K01689+K01900+K00297+K00382+K00605+K01623+K01681+K01681+K01681+K01681+K00030+K00058+K00927+K00626+K00863+K00029+K00850+K00863+K00844+K00164+K00626+K01681+K00134+K00237+…
Protein processing in endoplasmic reticulum	ko04141	554	c100142.graph_c0;c100173.graph_c0;c100413.graph_c0;c10044.graph_c0;c100449.graph_c0;c100452.graph_c1;c100509.graph_c0;c100509.graph_c1;c100813.graph_c0;c100828.graph_c0;c100857.graph_c1;c100918.graph_c1;c100940.graph_c0;c100948.graph_c0;c101079.graph_c0;c101079.graph_c1;c101405.graph_c0;c101405.graph_c1;c101553.graph_c0;c101694.graph_c0;c101781.graph_c0;c102000.graph_c1;c102160.graph_c0;c102234.g…	K12668+K09503+K12666+K10080+K06689+K01230+K14009+K14009+K14011+K09054+K06689+K08056+K10578+K14007+K04523+K04523+K03283+K03283+K09490+K01456+K12666+K10099+K10956+K09584+K09502+K09487+K03094+K14025+K14001+K09542+K07765+K04079+K08057+K10956+K14006+K08056+K14015+K07151+K09580+K08860+K09517+K04079+K04079+K11718+K09562+K10956+K14003+K09523+K14026+K03283+K05546+K05546+K09580+K08653+K07151+K04523+K10666+…
Oxidative phosphorylation	ko00190	450	c100009.graph_c0;c100102.graph_c0;c100302.graph_c0;c100806.graph_c0;c100806.graph_c1;c101017.graph_c0;c101352.graph_c0;c101671.graph_c0;c101728.graph_c1;c101815.graph_c0;c101971.graph_c0;c102014.graph_c0;c102014.graph_c1;c102190.graph_c0;c103195.graph_c0;c103210.graph_c0;c103291.graph_c1;c103437.graph_c0;c104229.graph_c0;c104667.graph_c0;c104780.graph_c0;c105342.graph_c0;c105619.graph_c1;c105698.…	K02147+K02153+K03953+K02132+K02132+K02136+K02144+K02145+K02133+K02152+K02144+K00234+K00234+K02154+K00234+K02272+K02256+K03942+K02150+K02145+K03934+K02262+K00237+K02155+K03934+K02147+K03954+K02154+K02146+K02154+K02128+K00413+K02145+K00234+K02145+K02145+K02265+K02270+K03965+K02261+K00412+K02261+K00419+K02265+K03964+K00420+K03880+K03881+K03946+K02267+K03955+K02146+K11352+K03948+K00236+K02136+K03881+…
Biosynthesis of amino acids	ko01230	434	c100006.graph_c0;c100108.graph_c0;c100291.graph_c0;c100325.graph_c0;c100478.graph_c0;c100565.graph_c0;c100568.graph_c0;c101093.graph_c0;c101363.graph_c0;c101715.graph_c0;c101972.graph_c0;c101981.graph_c0;c102151.graph_c0;c102429.graph_c0;c102496.graph_c0;c102911.graph_c0;c102972.graph_c0;c103418.graph_c0;c103466.graph_c0;c103472.graph_c0;c103595.graph_c0;c104292.graph_c1;c104355.graph_c0;c104355.…	K00826+K00030+K00616+K00927+K01755+K00825+K00500+K00600+K01697+K01623+K01647+K00031+K01758+K01940+K00600+K00826+K01681+K00286+K00814+K01940+K01689+K01623+K01681+K01681+K01681+K01681+K00030+K00058+K00789+K00927+K00850+K01915+K01681+K00134+K01687+K12657+K12657+K00031+K00031+K00058+K00615+K00615+K01697+K14085+K00264+K01958+K01958+K01958+K01958+K00134+K00134+K00290+K00030+K01647+K01697+K00134+K01647+…
Spliceosome	ko03040	406	c100584.graph_c1;c100741.graph_c0;c100910.graph_c0;c100910.graph_c1;c101368.graph_c0;c101405.graph_c0;c101405.graph_c1;c101448.graph_c0;c101471.graph_c0;c101802.graph_c0;c101851.graph_c0;c102129.graph_c0;c102388.graph_c0;c102521.graph_c0;c102697.graph_c0;c102757.graph_c0;c102857.graph_c2;c103171.graph_c0;c103187.graph_c0;c103633.graph_c0;c103900.graph_c0;c103963.graph_c0;c104135.graph_c0;c104154.…	K11095+K12824+K12841+K12841+K12815+K03283+K03283+K12817+K12823+K12863+K12854+K12821+K12844+K12886+K12893+K12829+K12838+K12847+K12837+K12812+K12823+K12827+K12860+K12825+K12826+K12824+K12813+K12823+K03283+K12812+K12891+K12864+K12662+K12842+K12822+K12854+K06063+K12828+K12855+K12843+K03283+K12856+K12856+K12856+K12852+K12868+K12867+K12830+K12879+K12835+K12854+K12818+K12874+K12874+K12874+K12816+K12857+…
RNA transport	ko03013	401	c100331.graph_c1;c100331.graph_c2;c101025.graph_c0;c101292.graph_c0;c101947.graph_c0;c102033.graph_c0;c102121.graph_c0;c102127.graph_c0;c102336.graph_c0;c102715.graph_c0;c102736.graph_c0;c102736.graph_c1;c103182.graph_c0;c103182.graph_c1;c103315.graph_c0;c103315.graph_c1;c103515.graph_c0;c103633.graph_c0;c104081.graph_c0;c104182.graph_c3;c104309.graph_c0;c104362.graph_c4;c104542.graph_c0;c104577.…	K09291+K09291+K14315+K03242+K14304+K13175+K13174+K14284+K00974+K14284+K14327+K05019+K14323+K14323+K13126+K13126+K14300+K12812+K14299+K03538+K12172+K03539+K14305+K03252+K03260+K03241+K14320+K12812+K03243+K14318+K14317+K03251+K14301+K14307+K14313+K14313+K03252+K03252+K03252+K03237+K13151+K05749+K14311+K14326+K03231+K01164+K01164+K01164+K03231+K12879+K03259+K14289+K14308+K18644+K15516+K14314+K14296+…
Purine metabolism	ko00230	357	c100020.graph_c1;c100040.graph_c0;c100041.graph_c0;c100357.graph_c0;c100710.graph_c0;c101014.graph_c0;c101014.graph_c1;c101287.graph_c1;c101434.graph_c0;c101789.graph_c0;c102057.graph_c0;c102085.graph_c0;c102239.graph_c0;c102278.graph_c0;c102350.graph_c0;c102665.graph_c3;c102942.graph_c0;c102963.graph_c0;c103037.graph_c0;c103154.graph_c0;c103248.graph_c0;c103282.graph_c0;c10357.graph_c0;c103666.g…	K03025+K03015+K03013+K01519+K10808+K13293+K13293+K03010+K00088+K00602+K00856+K00364+K00856+K01514+K01951+K00942+K03009+K01487+K01081+K00602+K03010+K01769+K00856+K12323+K13988+K13763+K13763+K00856+K01477+K01769+K13293+K03016+K00939+K10807+K02327+K03021+K01768+K03010+K00106+K13761+K12319+K14721+K13755+K13755+K08049+K08049+K01952+K18437+K01081+K08042+K03023+K01756+K02321+K13811+K11265+K12304+K08043+…
Peroxisome	ko04146	302	c100035.graph_c0;c100340.graph_c0;c100954.graph_c0;c101213.graph_c0;c101654.graph_c0;c101981.graph_c0;c102269.graph_c0;c102467.graph_c0;c102502.graph_c0;c102583.graph_c0;c102819.graph_c0;c103529.graph_c0;c103602.graph_c0;c103643.graph_c0;c103784.graph_c0;c103791.graph_c0;c103896.graph_c0;c104008.graph_c0;c104069.graph_c0;c104465.graph_c1;c104465.graph_c3;c104477.graph_c0;c104978.graph_c0;c105042.…	K11187+K04564+K13335+K13239+K04565+K00031+K11147+K13355+K08764+K04565+K01897+K05676+K13356+K11517+K03781+K12261+K12405+K04565+K13356+K03781+K03781+K01796+K01897+K13356+K00273+K00106+K01578+K12405+K00031+K00031+K00232+K01897+K13339+K00232+K00106+K13338+K07513+K00306+K13343+K13342+K00830+K05676+K13352+K05676+K13350+K03781+K05676+K00106+K13342+K12405+K04564+K01640+K13338+K13239+K12405+K00031+K00306+…
Ubiquitin mediated proteolysis	ko04120	301	c100171.graph_c0;c100190.graph_c0;c100449.graph_c0;c100857.graph_c1;c100940.graph_c0;c101501.graph_c1;c101511.graph_c0;c101722.graph_c0;c101871.graph_c0;c102000.graph_c1;c102154.graph_c0;c102699.graph_c0;c102807.graph_c0;c102872.graph_c0;c102940.graph_c1;c103007.graph_c1;c103305.graph_c0;c103326.graph_c0;c103535.graph_c0;c103566.graph_c0;c103661.graph_c0;c103679.graph_c1;c103746.graph_c0;c103813.…	K02207+K10608+K06689+K06689+K10578+K03352+K03350+K10595+K02207+K10099+K07868+K03870+K03094+K10595+K03355+K10579+K10612+K10598+K03363+K10591+K16060+K10588+K10587+K10589+K10615+K04678+K10610+K10590+K10143+K10260+K16064+K03178+K10605+K10605+K10609+K10609+K03872+K10582+K04725+K03349+K16060+K10581+K10581+K10593+K03351+K03364+K03353+K10596+K04707+K10586+K10586+K03348+K03348+K10592+K10592+K04649+K10595+…
Phagosome	ko04145	291	c100009.graph_c0;c100102.graph_c0;c100194.graph_c0;c101352.graph_c0;c101671.graph_c0;c101815.graph_c0;c101971.graph_c0;c102082.graph_c1;c102103.graph_c0;c102160.graph_c0;c102190.graph_c0;c102392.graph_c0;c103419.graph_c1;c103553.graph_c1;c103696.graph_c1;c103716.graph_c0;c103819.graph_c0;c104151.graph_c0;c104229.graph_c0;c104653.graph_c0;c104667.graph_c0;c104700.graph_c1;c104700.graph_c4;c105424.…	K02147+K02153+K07374+K02144+K02145+K02152+K02144+K10414+K08488+K10956+K02154+K00914+K04659+K12182+K05719+K08057+K10956+K04392+K02150+K10956+K02145+K10415+K10415+K01365+K05719+K02155+K02147+K02154+K07897+K02146+K02154+K02145+K05719+K02145+K02145+K10414+K00921+K10413+K05692+K09481+K07375+K02146+K07889+K07888+K01365+K07374+K08517+K02155+K05692+K02152+K02155+K07374+K07897+K07374+K10415+K07375+K02155+…
Endocytosis	ko04144	290	c100861.graph_c0;c101078.graph_c0;c101104.graph_c0;c101405.graph_c0;c101405.graph_c1;c101426.graph_c0;c101572.graph_c0;c101593.graph_c0;c101714.graph_c3;c101731.graph_c0;c101955.graph_c0;c102082.graph_c0;c102140.graph_c1;c102272.graph_c0;c102815.graph_c0;c103120.graph_c0;c103512.graph_c1;c103553.graph_c1;c103566.graph_c0;c104166.graph_c0;c104182.graph_c0;c104436.graph_c0;c104522.graph_c0;c104562.…	K12184+K08291+K12959+K03283+K03283+K12483+K07937+K12194+K07941+K04393+K12471+K12494+K12479+K12493+K12471+K06093+K12485+K12182+K10591+K04678+K04646+K12489+K12488+K12484+K12486+K12483+K03283+K12487+K12186+K12186+K12480+K12488+K00889+K07897+K18443+K11866+K11824+K03283+K01528+K04674+K04513+K01115+K01115+K12495+K12495+K12495+K05096+K05096+K05096+K18442+K05126+K00889+K05704+K04361+K04361+K04707+K18441+…
Lysosome	ko04142	278	c100308.graph_c0;c100564.graph_c0;c100943.graph_c0;c101036.graph_c0;c101196.graph_c0;c101352.graph_c0;c101570.graph_c0;c101940.graph_c0;c101971.graph_c0;c102108.graph_c0;c102190.graph_c0;c102444.graph_c0;c102491.graph_c0;c102634.graph_c0;c102794.graph_c0;c102909.graph_c0;c102998.graph_c0;c103159.graph_c0;c103159.graph_c1;c103406.graph_c0;c103540.graph_c0;c103584.graph_c0;c103584.graph_c1;c103766.…	K01195+K12392+K01369+K01379+K12386+K02144+K12385+K12399+K02144+K01379+K02154+K01074+K01373+K12396+K01379+K12373+K12386+K01279+K01279+K01158+K12347+K13444+K13444+K12373+K12350+K10532+K10532+K06497+K12397+K04646+K01195+K12347+K12373+K01373+K12382+K01205+K06497+K01365+K12373+K02155+K12389+K12382+K12307+K12311+K02154+K13443+K12316+K02146+K01565+K02154+K12350+K01137+K12309+K12394+K10532+K12384+K02146+…
Proteasome	ko03050	276	c100019.graph_c0;c100720.graph_c0;c102235.graph_c0;c103752.graph_c0;c104497.graph_c2;c105545.graph_c0;c105545.graph_c3;c105738.graph_c1;c106588.graph_c0;c108143.graph_c0;c110233.graph_c0;c11087.graph_c0;c110978.graph_c0;c11115.graph_c0;c112527.graph_c0;c112856.graph_c0;c112994.graph_c0;c113158.graph_c0;c113249.graph_c0;c113531.graph_c0;c114155.graph_c0;c114820.graph_c0;c115183.graph_c0;c117771.gr…	K02737+K02728+K03061+K02732+K06700+K06699+K06699+K02735+K03031+K06699+K02734+K03062+K03032+K03033+K02725+K03032+K11599+K03031+K02738+K02727+K03038+K02725+K02739+K02738+K03036+K02735+K03038+K02734+K02731+K02736+K03061+K03061+K03066+K03066+K03029+K03032+K02729+K03028+K03037+K02737+K02737+K03029+K02732+K03030+K03038+K11599+K03065+K03032+K02738+K03061+K03028+K03031+K03037+K03032+K06699+K03032+K02737+…
Pyrimidine metabolism	ko00240	267	c100020.graph_c1;c100040.graph_c0;c100041.graph_c0;c100288.graph_c0;c100294.graph_c0;c100357.graph_c0;c100710.graph_c0;c100811.graph_c0;c101247.graph_c0;c101287.graph_c1;c102331.graph_c0;c102349.graph_c0;c102803.graph_c0;c102803.graph_c1;c102859.graph_c1;c102942.graph_c0;c103037.graph_c0;c103248.graph_c0;c103783.graph_c0;c104314.graph_c3;c104488.graph_c0;c104669.graph_c0;c104837.graph_c0;c104902.…	K03025+K03015+K03013+K01937+K00254+K01519+K10808+K00384+K00876+K03010+K16066+K00254+K01431+K01431+K13421+K03009+K01081+K03010+K01493+K11540+K03016+K11540+K10807+K02327+K03021+K03010+K14721+K00207+K00761+K01081+K03023+K01464+K13421+K02321+K00757+K12304+K02999+K03002+K02320+K03006+K03010+K03008+K03006+K01937+K13800+K03002+K01520+K01489+K11540+K03007+K01519+K03006+K03010+K10808+K16330+K03002+K01937+…
Glycolysis / Gluconeogenesis	ko00010	264	c100007.graph_c0;c100325.graph_c0;c101389.graph_c0;c101608.graph_c0;c101715.graph_c0;c101909.graph_c0;c102896.graph_c0;c102896.graph_c1;c103075.graph_c0;c103127.graph_c0;c103266.graph_c0;c103351.graph_c0;c103447.graph_c0;c103559.graph_c0;c103595.graph_c0;c103936.graph_c0;c103991.graph_c1;c104103.graph_c0;c104292.graph_c1;c104512.graph_c0;c104936.graph_c0;c105100.graph_c3;c105579.graph_c1;c106436.…	K00844+K00927+K00162+K00128+K01623+K00382+K01895+K01895+K00128+K01810+K03103+K00627+K00627+K01785+K01689+K01785+K00382+K03103+K01623+K00927+K00850+K00844+K00134+K00121+K01895+K01810+K14085+K00128+K01596+K00162+K00134+K00134+K00134+K00134+K00149+K01895+K01895+K00002+K00873+K00873+K00134+K01792+K00128+K01785+K00927+K01895+K13952+K15779+K00627+K00128+K00873+K15633+K00121+K01623+K00850+K01792+K01803+…
mRNA surveillance pathway	ko03015	255	c100085.graph_c0;c100111.graph_c2;c100244.graph_c0;c100293.graph_c0;c100293.graph_c1;c100459.graph_c0;c100733.graph_c0;c101295.graph_c0;c101769.graph_c0;c102127.graph_c0;c102715.graph_c0;c102736.graph_c0;c102785.graph_c1;c102883.graph_c0;c103182.graph_c0;c103182.graph_c1;c103186.graph_c0;c103315.graph_c0;c103315.graph_c1;c103587.graph_c2;c103592.graph_c0;c103633.graph_c0;c10387.graph_c0;c103888.g…	K14411+K11584+K11583+K14962+K14962+K03456+K14400+K14404+K14400+K14284+K14284+K14327+K06965+K06269+K14323+K14323+K11583+K13126+K13126+K11584+K14406+K12812+K03267+K14398+K14400+K12812+K04354+K06269+K14408+K14408+K14416+K14409+K14409+K14409+K14326+K14400+K14400+K14408+K11124+K14376+K06269+K11125+K14400+K14400+K14402+K06100+K14401+K08873+K06269+K04382+K13126+K12876+K14407+K06965+K04354+K15544+K14376+…
Citrate cycle (TCA cycle)	ko00020	247	c100108.graph_c0;c100496.graph_c0;c100799.graph_c0;c101092.graph_c0;c101379.graph_c0;c101389.graph_c0;c101909.graph_c0;c101972.graph_c0;c101981.graph_c0;c102014.graph_c0;c102014.graph_c1;c102533.graph_c0;c102972.graph_c0;c103195.graph_c0;c103351.graph_c0;c103447.graph_c0;c103586.graph_c1;c103762.graph_c0;c103991.graph_c1;c104355.graph_c0;c104355.graph_c1;c104390.graph_c0;c104390.graph_c2;c10440.g…	K00030+K00025+K00026+K01899+K01679+K00162+K00382+K01647+K00031+K00234+K00234+K00658+K01681+K00234+K00627+K00627+K00164+K01900+K00382+K01681+K01681+K01681+K01681+K00030+K00164+K01681+K00237+K00031+K00031+K01958+K01596+K00234+K00162+K00026+K01958+K01958+K01958+K00030+K01647+K00236+K01647+K01648+K01648+K01647+K01681+K00236+K01681+K00030+K01681+K00031+K00658+K00025+K01648+K01681+K00235+K01648+K01899+…
Ribosome biogenesis in eukaryotes	ko03008	245	c100209.graph_c0;c100225.graph_c0;c101371.graph_c0;c101562.graph_c0;c101848.graph_c0;c101998.graph_c2;c102127.graph_c0;c102229.graph_c0;c102367.graph_c0;c102715.graph_c0;c102793.graph_c0;c102956.graph_c0;c103183.graph_c0;c103218.graph_c0;c104182.graph_c3;c104225.graph_c0;c104314.graph_c4;c104362.graph_c4;c104610.graph_c0;c104620.graph_c1;c104929.graph_c0;c105052.graph_c2;c105622.graph_c0;c105622.…	K14521+K13288+K14570+K14554+K14546+K14549+K14284+K14566+K07179+K14284+K14561+K14556+K12619+K14569+K03538+K14565+K03115+K03539+K14557+K14555+K14553+K03097+K14570+K14570+K14537+K14559+K14570+K11131+K14550+K14538+K14536+K14575+K14544+K01164+K01164+K01164+K14544+K03685+K14552+K12618+K14570+K14571+K14564+K14552+K14558+K14558+K14572+K14290+K14567+K14572+K12845+K06943+K06943+K12618+K14538+K14565+K14555+…
Fatty acid metabolism	ko01212	227	c100026.graph_c0;c100095.graph_c0;c100182.graph_c0;c100253.graph_c0;c100320.graph_c0;c101289.graph_c0;c101457.graph_c0;c101672.graph_c0;c101704.graph_c0;c102126.graph_c0;c102303.graph_c0;c102303.graph_c1;c102444.graph_c0;c102772.graph_c0;c102790.graph_c0;c102819.graph_c0;c103108.graph_c1;c103371.graph_c0;c103594.graph_c0;c104440.graph_c0;c104520.graph_c0;c104853.graph_c0;c104928.graph_c0;c104978.…	K00665+K00507+K00665+K00665+K07511+K00665+K00507+K00507+K00665+K10256+K07509+K07509+K01074+K07512+K00626+K01897+K11262+K00665+K10703+K00665+K00626+K08765+K00665+K01897+K10251+K00626+K09479+K09478+K10226+K00507+K00665+K00249+K00232+K00249+K00248+K00665+K00665+K01897+K15013+K15013+K00232+K00665+K00665+K11262+K11262+K11262+K07513+K07512+K00665+K09478+K10703+K10256+K10257+K00232+K07513+K10703+K07512+…
RNA degradation	ko03018	227	c100332.graph_c1;c100436.graph_c0;c100863.graph_c0;c101030.graph_c0;c101139.graph_c0;c101553.graph_c1;c102250.graph_c0;c102770.graph_c1;c103183.graph_c0;c103315.graph_c0;c103315.graph_c1;c103595.graph_c0;c103711.graph_c0;c104370.graph_c0;c104497.graph_c0;c104497.graph_c1;c104522.graph_c1;c104522.graph_c2;c104936.graph_c0;c104961.graph_c1;c105251.graph_c0;c105251.graph_c1;c105444.graph_c0;c105490.…	K12590+K12591+K03679+K12617+K12572+K04043+K12571+K10643+K12619+K13126+K13126+K01689+K04077+K03514+K12614+K12614+K10643+K10643+K00850+K12613+K14442+K14442+K12604+K12607+K03678+K14443+K12598+K12586+K04043+K12604+K14443+K03681+K12599+K14443+K12585+K12618+K12616+K12625+K12614+K04043+K13126+K12618+K12572+K12580+K12581+K04043+K03678+K04043+K12585+K03679+K12572+K12605+K12604+K00850+K13126+K12614+K12604+…
Aminoacyl-tRNA biosynthesis	ko00970	211	c100342.graph_c0;c100497.graph_c0;c100578.graph_c0;c100691.graph_c0;c100691.graph_c1;c100816.graph_c1;c102078.graph_c0;c102284.graph_c0;c102415.graph_c0;c102584.graph_c0;c102647.graph_c0;c102964.graph_c0;c103021.graph_c1;c103071.graph_c0;c103071.graph_c1;c103309.graph_c0;c103432.graph_c0;c103931.graph_c0;c103975.graph_c0;c103997.graph_c0;c104682.graph_c0;c104811.graph_c0;c104811.graph_c1;c104855.…	K01889+K14163+K01867+K01870+K01870+K01874+K01875+K14163+K01880+K00604+K01875+K14163+K01889+K01880+K01880+K01876+K04567+K01883+K01893+K02433+K01867+K01889+K01889+K02434+K01893+K01875+K01883+K01890+K01885+K01874+K01876+K01870+K01872+K02434+K01892+K01876+K01868+K01868+K01868+K01893+K01869+K01881+K01873+K01869+K01887+K01872+K01870+K01866+K01866+K01876+K01892+K01872+K01874+K01873+K01892+K01876+K01870+…
Pyruvate metabolism	ko00620	198	c100496.graph_c0;c100799.graph_c0;c101379.graph_c0;c101389.graph_c0;c101608.graph_c0;c101909.graph_c0;c102790.graph_c0;c102896.graph_c0;c102896.graph_c1;c103075.graph_c0;c103108.graph_c1;c103351.graph_c0;c103447.graph_c0;c103991.graph_c1;c104520.graph_c0;c104873.graph_c0;c105264.graph_c0;c106636.graph_c2;c107224.graph_c1;c107360.graph_c0;c107395.graph_c0;c107603.graph_c1;c107977.graph_c0;c108111.…	K00025+K00026+K01679+K00162+K00128+K00382+K00626+K01895+K01895+K00128+K11262+K00627+K00627+K00382+K00626+K00029+K00626+K01895+K14085+K00128+K01958+K01596+K00162+K00026+K01958+K01958+K01958+K11262+K11262+K11262+K00029+K01759+K00149+K01895+K01895+K00873+K00029+K00873+K00025+K00128+K01895+K00102+K00627+K00128+K00029+K00873+K01069+K00149+K00029+K00627+K01679+K00025+K00162+K00382+K00627+K01895+K01895+…
FoxO signaling pathway	ko04068	198	c100179.graph_c0;c100340.graph_c0;c100462.graph_c3;c101293.graph_c0;c101378.graph_c0;c101869.graph_c0;c103137.graph_c0;c103533.graph_c0;c103553.graph_c0;c103683.graph_c0;c103784.graph_c0;c103987.graph_c0;c104200.graph_c0;c104419.graph_c0;c104465.graph_c1;c104465.graph_c3;c104955.graph_c0;c105209.graph_c0;c105487.graph_c0;c105698.graph_c10;c105698.graph_c12;c105698.graph_c8;c105925.graph_c0;c10615…	K07200+K04564+K02649+K04441+K07198+K06631+K09385+K02206+K04498+K06276+K03781+K07198+K00922+K11434+K03781+K03781+K16172+K15464+K03099+K04498+K04498+K04498+K08863+K10305+K04728+K04501+K06276+K04527+K04527+K11411+K04674+K01596+K15010+K04603+K01110+K04371+K04361+K04361+K01110+K04364+K04728+K11434+K03781+K06276+K04564+K07198+K04371+K04456+K07199+K11411+K04369+K11838+K04371+K07198+K04498+K08341+K01110+…
Arginine and proline metabolism	ko00330	179	c100165.graph_c0;c100478.graph_c0;c100835.graph_c0;c101159.graph_c0;c101558.graph_c0;c101608.graph_c0;c102429.graph_c0;c102826.graph_c0;c102826.graph_c1;c103075.graph_c0;c103128.graph_c0;c103418.graph_c0;c103472.graph_c0;c104012.graph_c0;c104024.graph_c0;c104932.graph_c0;c104932.graph_c1;c10498.graph_c0;c105074.graph_c0;c105076.graph_c0;c106209.graph_c0;c106209.graph_c1;c106461.graph_c1;c107224.g…	K01611+K01755+K00262+K01581+K00802+K00128+K01940+K00294+K00294+K00128+K15371+K00286+K01940+K00797+K08660+K00318+K00318+K01611+K00273+K01915+K12657+K12657+K00819+K14085+K01425+K00128+K01611+K00819+K00819+K01581+K14677+K00149+K00262+K12657+K00797+K01480+K00128+K00294+K00128+K01948+K01476+K14455+K00797+K01948+K00933+K00611+K00611+K01915+K00261+K00149+K01611+K01755+K00286+K01425+K01948+K00797+K00128+…
Fatty acid degradation	ko00071	174	c100320.graph_c0;c101213.graph_c0;c101608.graph_c0;c102303.graph_c0;c102303.graph_c1;c102790.graph_c0;c102819.graph_c0;c102992.graph_c0;c103075.graph_c0;c104520.graph_c0;c104853.graph_c0;c104978.graph_c0;c105264.graph_c0;c105350.graph_c1;c105412.graph_c0;c10632.graph_c0;c106436.graph_c1;c106451.graph_c0;c106520.graph_c2;c106571.graph_c0;c107224.graph_c1;c107360.graph_c0;c107786.graph_c0;c107887.g…	K07511+K13239+K00128+K07509+K07509+K00626+K01897+K00252+K00128+K00626+K08765+K01897+K00626+K09479+K09478+K00249+K00121+K00232+K00249+K00248+K14085+K00128+K01897+K15013+K15013+K00232+K07513+K00149+K09478+K13239+K00232+K07513+K08765+K00128+K00232+K13952+K00128+K07514+K00232+K00121+K01897+K13951+K00149+K01897+K00121+K01897+K07513+K07513+K00255+K01897+K07509+K00128+K01897+K00249+K00232+K00232+K00149+…
Amino sugar and nucleotide sugar metabolism	ko00520	172	c100007.graph_c0;c100228.graph_c0;c100815.graph_c0;c101275.graph_c1;c101766.graph_c0;c101959.graph_c0;c102130.graph_c0;c102656.graph_c0;c102675.graph_c0;c102909.graph_c0;c103127.graph_c0;c103333.graph_c0;c103389.graph_c0;c103392.graph_c0;c103766.graph_c0;c104431.graph_c0;c104431.graph_c1;c105046.graph_c0;c105100.graph_c3;c105466.graph_c0;c105598.graph_c0;c106682.graph_c0;c107557.graph_c0;c107667.…	K00844+K02377+K00326+K01639+K01183+K00963+K01183+K01183+K01836+K12373+K01810+K01639+K00972+K01183+K12373+K01183+K01183+K12373+K00844+K01183+K12373+K01810+K01784+K08678+K00849+K00820+K01809+K01784+K00966+K01784+K01836+K01784+K00963+K01784+K15779+K08678+K00326+K00963+K01097+K00963+K00963+K00012+K00966+K01784+K08678+K12407+K08678+K01835+K08678+K01183+K00963+K00698+K12373+K00844+K15779+K08678+K00966+…
Cysteine and methionine metabolism	ko00270	169	c100165.graph_c0;c100496.graph_c0;c100799.graph_c0;c101326.graph_c0;c101363.graph_c0;c101558.graph_c0;c101902.graph_c0;c102151.graph_c0;c103190.graph_c0;c103969.graph_c0;c104012.graph_c0;c104475.graph_c2;c10498.graph_c0;c105349.graph_c0;c106275.graph_c0;c107161.graph_c0;c107693.graph_c0;c108111.graph_c4;c110279.graph_c0;c111603.graph_c0;c113824.graph_c0;c114599.graph_c0;c115726.graph_c0;c115744.g…	K01611+K00025+K00026+K01251+K01697+K00802+K09880+K01758+K00456+K08963+K00797+K00789+K01611+K00547+K01251+K01697+K01611+K00026+K01697+K01251+K01758+K00797+K00789+K08963+K00025+K09880+K01758+K01251+K08964+K01738+K01738+K09880+K14455+K00797+K01011+K00549+K08964+K01611+K01758+K00025+K08967+K00797+K01611+K00815+K00641+K01758+K01738+K00641+K00026+K00026+K00026+K01011+K08964+K01697+K01738+K14454+K14455+…
Wnt signaling pathway	ko04310	168	c101649.graph_c0;c102807.graph_c0;c103233.graph_c0;c103310.graph_c0;c103317.graph_c0;c103317.graph_c1;c103553.graph_c0;c103739.graph_c0;c104047.graph_c0;c104047.graph_c1;c104059.graph_c0;c104151.graph_c0;c104314.graph_c4;c105052.graph_c2;c105698.graph_c10;c105698.graph_c12;c105698.graph_c8;c105752.graph_c2;c106526.graph_c0;c106581.graph_c1;c106806.graph_c0;c106965.graph_c0;c107177.graph_c1;c10719…	K04496+K03094+K01691+K04499+K04448+K04448+K04498+K04491+K00445+K00445+K04345+K04392+K03115+K03097+K04498+K04498+K04498+K02353+K02842+K04501+K02306+K05858+K02105+K04511+K04511+K04348+K04348+K04513+K17388+K17388+K04512+K04427+K05858+K04499+K02085+K03068+K03347+K08957+K03868+K03083+K04348+K04498+K04507+K08960+K04513+K04498+K03115+K03347+K04513+K03094+K03347+K08960+K02677+K03083+K02105+K04498+K04345+…
Alanine, aspartate and glutamate metabolism	ko00250	163	c100478.graph_c0;c100800.graph_c1;c100835.graph_c0;c102429.graph_c0;c102442.graph_c0;c102826.graph_c0;c102826.graph_c1;c103128.graph_c0;c103466.graph_c0;c103472.graph_c0;c103522.graph_c0;c104314.graph_c3;c104669.graph_c0;c105076.graph_c0;c105615.graph_c0;c105989.graph_c5;c105989.graph_c7;c106911.graph_c0;c107299.graph_c0;c107383.graph_c0;c108181.graph_c0;c11108.graph_c0;c111878.graph_c0;c111998.g…	K01755+K01580+K00262+K01940+K01953+K00294+K00294+K15371+K00814+K01940+K01953+K11540+K11540+K01915+K00827+K01580+K01580+K01756+K01425+K00264+K00820+K00830+K00139+K00827+K00262+K01953+K11540+K00139+K11540+K11540+K00294+K00814+K01948+K14455+K01953+K01948+K00272+K01915+K00264+K00261+K01755+K00139+K01425+K01948+K11540+K13524+K00294+K00261+K11540+K00814+K01939+K01755+K00814+K01755+K01756+K00264+K11540+…
Starch and sucrose metabolism	ko00500	161	c100007.graph_c0;c100308.graph_c0;c101759.graph_c0;c101959.graph_c0;c102176.graph_c0;c102406.graph_c0;c102542.graph_c0;c102918.graph_c0;c102976.graph_c0;c103127.graph_c0;c103733.graph_c0;c103734.graph_c0;c104333.graph_c0;c104652.graph_c0;c105100.graph_c3;c106029.graph_c0;c106304.graph_c0;c106511.graph_c0;c106573.graph_c0;c106576.graph_c0;c106682.graph_c0;c106714.graph_c0;c106945.graph_c0;c107199.…	K00844+K01195+K01187+K00963+K00699+K00699+K00699+K00699+K16055+K01810+K00699+K01187+K01195+K01176+K00844+K00699+K00699+K01194+K00688+K12316+K01810+K01187+K00688+K16055+K01194+K01196+K01196+K08678+K12316+K01176+K00963+K16055+K01196+K00688+K15779+K00700+K08678+K00693+K00963+K00963+K00688+K00963+K01194+K00688+K01196+K00699+K00688+K00012+K00699+K08678+K12407+K16055+K08678+K01835+K08678+K00963+K00693+…
Valine, leucine and isoleucine degradation	ko00280	159	c100006.graph_c0;c100320.graph_c0;c100763.graph_c0;c100850.graph_c0;c101608.graph_c0;c101909.graph_c0;c102119.graph_c0;c102303.graph_c0;c102303.graph_c1;c102334.graph_c1;c102790.graph_c0;c102911.graph_c0;c103075.graph_c0;c103568.graph_c0;c103991.graph_c1;c104213.graph_c2;c104520.graph_c0;c105264.graph_c0;c105412.graph_c0;c105714.graph_c1;c10632.graph_c0;c106520.graph_c2;c106571.graph_c0;c107224.g…	K00826+K07511+K01969+K01968+K00128+K00382+K18660+K07509+K07509+K01641+K00626+K00826+K00128+K00140+K00382+K00020+K00626+K00626+K09478+K01969+K00249+K00249+K00248+K14085+K00128+K08683+K07513+K01641+K01641+K05607+K00149+K00140+K00826+K01641+K09478+K01640+K07513+K00128+K01641+K00128+K07514+K01640+K00826+K00149+K07513+K07513+K05605+K00382+K13524+K07509+K00128+K00249+K18660+K00149+K00166+K18661+K00128+…
Lysine degradation	ko00310	159	c100320.graph_c0;c100565.graph_c0;c101329.graph_c0;c101608.graph_c0;c102296.graph_c0;c102435.graph_c0;c102533.graph_c0;c102790.graph_c0;c102796.graph_c0;c102804.graph_c0;c102992.graph_c0;c103075.graph_c0;c103158.graph_c0;c103525.graph_c0;c103525.graph_c1;c103586.graph_c1;c104520.graph_c0;c105164.graph_c0;c105207.graph_c0;c105264.graph_c0;c105333.graph_c0;c105333.graph_c2;c105461.graph_c0;c107053.…	K07511+K00825+K11423+K00128+K06101+K09188+K00658+K00626+K14157+K11433+K00252+K00128+K11421+K09188+K09188+K00164+K00626+K00164+K11424+K00626+K09188+K09188+K09189+K11433+K14085+K00128+K13647+K11420+K11433+K06101+K14157+K14157+K00306+K00290+K00149+K11429+K00658+K00306+K00128+K11433+K00128+K07514+K00658+K11433+K00474+K00149+K11433+K00128+K14157+K00658+K11433+K00149+K00658+K11419+K11433+K00128+K00022+…
Glycerophospholipid metabolism	ko00564	150	c100123.graph_c1;c100255.graph_c0;c100871.graph_c0;c101303.graph_c0;c101595.graph_c0;c101595.graph_c1;c102094.graph_c0;c102209.graph_c0;c102357.graph_c0;c102532.graph_c0;c102546.graph_c0;c102801.graph_c0;c103288.graph_c0;c103288.graph_c1;c103296.graph_c0;c103548.graph_c3;c104624.graph_c0;c105028.graph_c0;c105032.graph_c0;c105499.graph_c0;c105748.graph_c0;c105841.graph_c0;c106550.graph_c0;c106550.…	K15728+K00968+K13515+K00993+K00006+K00006+K13509+K13506+K13517+K00111+K14156+K00967+K00006+K00006+K13506+K00993+K00901+K00111+K01047+K00995+K13516+K00901+K00629+K00629+K13510+K01049+K13511+K01115+K01115+K16860+K13509+K16343+K14676+K00901+K00901+K00111+K01115+K00006+K06130+K01613+K00111+K13517+K00968+K01049+K01613+K01613+K15728+K00967+K13517+K14286+K16342+K14676+K13523+K00901+K08744+K00981+K00629+…
Glyoxylate and dicarboxylate metabolism	ko00630	148	c100496.graph_c0;c100799.graph_c0;c101093.graph_c0;c101972.graph_c0;c102496.graph_c0;c102790.graph_c0;c102972.graph_c0;c103643.graph_c0;c103784.graph_c0;c104355.graph_c0;c104355.graph_c1;c104390.graph_c0;c104390.graph_c2;c104465.graph_c1;c104465.graph_c3;c104520.graph_c0;c105076.graph_c0;c105264.graph_c0;c10554.graph_c0;c106538.graph_c2;c108111.graph_c4;c109172.graph_c0;c110232.graph_c0;c11108.gr…	K00025+K00026+K00600+K01647+K00600+K00626+K01681+K11517+K03781+K01681+K01681+K01681+K01681+K03781+K03781+K00626+K01915+K00626+K01681+K02437+K00026+K01637+K01647+K00830+K01647+K03781+K01647+K01681+K01091+K01681+K01681+K00025+K01681+K11517+K11517+K01681+K11517+K01681+K03781+K01681+K11517+K01915+K00025+K02437+K01432+K00600+K01681+K00026+K00026+K00026+K01915+K03781+K00049+K00600+K01681+K01647+K11517+…
2-Oxocarboxylic acid metabolism	ko01210	143	c100006.graph_c0;c100108.graph_c0;c100565.graph_c0;c101972.graph_c0;c101981.graph_c0;c102911.graph_c0;c102972.graph_c0;c103466.graph_c0;c104355.graph_c0;c104355.graph_c1;c104390.graph_c0;c104390.graph_c2;c10440.graph_c0;c10554.graph_c0;c105621.graph_c0;c106443.graph_c0;c106443.graph_c1;c11005.graph_c0;c110232.graph_c0;c111390.graph_c0;c11187.graph_c0;c113113.graph_c0;c113297.graph_c0;c114083.grap…	K00826+K00030+K00825+K01647+K00031+K00826+K01681+K00814+K01681+K01681+K01681+K01681+K00030+K01681+K01687+K00031+K00031+K00030+K01647+K01647+K14677+K01647+K01681+K00826+K01681+K00030+K01681+K00031+K01681+K01702+K01687+K01687+K01681+K00814+K01681+K00030+K00031+K14455+K01681+K00826+K00030+K01702+K01702+K01681+K00814+K00814+K01702+K14677+K01702+K14454+K01681+K00031+K14455+K01647+K00814+K00814+K01687+…
mTOR signaling pathway	ko04150	139	c100462.graph_c3;c101378.graph_c0;c102969.graph_c2;c103513.graph_c0;c103683.graph_c0;c103847.graph_c0;c103987.graph_c0;c104188.graph_c0;c104200.graph_c0;c104788.graph_c0;c104955.graph_c0;c106444.graph_c0;c106568.graph_c2;c106744.graph_c0;c106800.graph_c0;c107356.graph_c1;c108056.graph_c1;c108134.graph_c2;c108197.graph_c0;c108209.graph_c0;c108410.graph_c0;c113564.graph_c0;c113732.graph_c0;c114669.…	K02649+K07198+K04688+K16185+K06276+K08268+K07198+K04373+K00922+K07207+K16172+K07203+K04688+K06276+K07204+K03259+K08267+K08268+K01110+K04371+K01110+K06276+K03259+K07198+K04371+K04456+K16186+K03259+K03258+K04371+K07198+K01110+K07207+K07203+K07207+K07204+K08272+K07198+K04371+K07207+K07203+K16186+K04371+K02677+K08266+K07203+K16185+K04373+K04456+K06276+K08272+K04373+K03259+K06276+K07208+K04456+K03259+…
Glutathione metabolism	ko00480	138	c100003.graph_c1;c100198.graph_c0;c100710.graph_c0;c101159.graph_c0;c101453.graph_c0;c101463.graph_c0;c101558.graph_c0;c101876.graph_c1;c101981.graph_c0;c102050.graph_c0;c102454.graph_c0;c102546.graph_c1;c103955.graph_c0;c103955.graph_c1;c104012.graph_c0;c104371.graph_c0;c104740.graph_c1;c104837.graph_c0;c105949.graph_c0;c105949.graph_c1;c106443.graph_c0;c106443.graph_c1;c106594.graph_c0;c107128.…	K01255+K00799+K10808+K01581+K00799+K00799+K00802+K00036+K00031+K11204+K00036+K11140+K01469+K01469+K00797+K00799+K01255+K10807+K18592+K18592+K00031+K00031+K00033+K00799+K01920+K00432+K01581+K01920+K01469+K00797+K10808+K11140+K00031+K00681+K01469+K00799+K00033+K01920+K01469+K18592+K00031+K00799+K00797+K01469+K00799+K00797+K00799+K00036+K00432+K11140+K10807+K11204+K00033+K00033+K11140+K01920+K00432+…
Hippo signaling pathway - fly	ko04391	135	c100016.graph_c0;c100099.graph_c0;c100459.graph_c0;c101506.graph_c0;c101600.graph_c0;c101932.graph_c0;c102171.graph_c0;c102739.graph_c0;c103120.graph_c0;c103276.graph_c0;c103708.graph_c2;c103708.graph_c4;c104134.graph_c2;c104363.graph_c0;c104930.graph_c0;c104930.graph_c1;c105091.graph_c0;c105091.graph_c1;c105140.graph_c0;c105140.graph_c1;c105544.graph_c0;c105755.graph_c0;c105898.graph_c0;c105898.…	K09851+K16684+K03456+K09448+K16676+K16175+K16686+K06626+K06093+K04676+K16690+K16690+K06091+K08791+K16507+K16507+K16683+K16683+K16675+K16675+K16175+K06094+K16683+K16683+K16683+K04354+K16682+K16682+K16682+K02306+K16675+K08791+K08791+K16680+K16680+K16681+K16681+K05692+K16507+K16677+K16175+K16675+K04382+K16669+K03456+K16175+K03456+K16673+K16687+K03456+K16669+K16669+K16669+K16672+K16669+K03456+K16677+…
Tryptophan metabolism	ko00380	133	c100320.graph_c0;c100565.graph_c0;c100822.graph_c0;c101018.graph_c0;c101417.graph_c0;c101608.graph_c0;c102790.graph_c0;c102992.graph_c0;c103075.graph_c0;c103481.graph_c0;c103586.graph_c1;c103784.graph_c0;c104332.graph_c1;c104465.graph_c1;c104465.graph_c3;c104520.graph_c0;c105101.graph_c0;c105164.graph_c0;c105264.graph_c0;c107224.graph_c1;c107360.graph_c0;c11025.graph_c0;c110773.graph_c0;c112062.g…	K07511+K00825+K01556+K00453+K00816+K00128+K00626+K00252+K00128+K01593+K00164+K03781+K00502+K03781+K03781+K00626+K01593+K00164+K00626+K14085+K00128+K07408+K07408+K03781+K00463+K00149+K01501+K00543+K00128+K00128+K07514+K00816+K03781+K00463+K00149+K01593+K00128+K01432+K00149+K00543+K00816+K00543+K00128+K00022+K07515+K00164+K00816+K00164+K00452+K03781+K07515+K03334+K00626+K00164+K00164+K01501+K01593+…
Glycine, serine and threonine metabolism	ko00260	132	c101093.graph_c0;c101363.graph_c0;c101909.graph_c0;c102151.graph_c0;c102496.graph_c0;c102754.graph_c0;c102833.graph_c0;c103991.graph_c1;c104136.graph_c0;c104455.graph_c0;c104515.graph_c0;c105074.graph_c0;c105615.graph_c0;c106292.graph_c1;c106538.graph_c2;c106567.graph_c0;c107161.graph_c0;c107224.graph_c1;c107274.graph_c1;c108490.graph_c3;c109423.graph_c0;c110279.graph_c0;c11108.graph_c0;c111998.g…	K00600+K01697+K00382+K01758+K00600+K00108+K00643+K00382+K00605+K00058+K00108+K00273+K00827+K00643+K02437+K00058+K01697+K14085+K15789+K00281+K00306+K01697+K00830+K00827+K01620+K01758+K00281+K00108+K00306+K01758+K00108+K01620+K01620+K15633+K00639+K01620+K01758+K00831+K00281+K00382+K02437+K00281+K00108+K00600+K01758+K00281+K15633+K01697+K00049+K00600+K15633+K01834+K00382+K00108+K00831+K00058+K00382+…
Glycerolipid metabolism	ko00561	128	c100123.graph_c1;c101608.graph_c0;c102094.graph_c0;c102209.graph_c0;c102357.graph_c0;c102787.graph_c0;c103075.graph_c0;c103296.graph_c0;c104120.graph_c0;c104284.graph_c0;c104420.graph_c1;c104624.graph_c0;c104757.graph_c0;c105099.graph_c0;c105389.graph_c0;c105841.graph_c0;c106079.graph_c0;c106550.graph_c0;c106550.graph_c1;c107224.graph_c1;c107360.graph_c0;c107511.graph_c0;c107809.graph_c1;c108102.…	K15728+K00128+K13509+K13506+K13517+K00864+K00128+K13506+K00011+K00011+K09881+K00901+K00863+K00863+K00011+K00901+K00864+K00629+K00629+K14085+K00128+K14457+K13509+K14073+K00901+K00901+K11155+K00011+K00011+K00149+K00002+K01054+K00011+K00011+K00128+K13517+K00128+K15728+K00002+K00149+K13517+K00128+K00011+K00002+K00149+K13523+K01054+K01054+K00901+K00629+K00864+K00901+K00128+K00011+K00011+K13509+K00901+…
Pentose and glucuronate interconversions	ko00040	123	c100308.graph_c0;c101608.graph_c0;c101742.graph_c0;c101959.graph_c0;c102176.graph_c0;c102406.graph_c0;c102542.graph_c0;c102918.graph_c0;c103075.graph_c0;c103733.graph_c0;c104120.graph_c0;c104284.graph_c0;c104333.graph_c0;c105389.graph_c0;c106029.graph_c0;c106304.graph_c0;c106556.graph_c0;c107360.graph_c0;c108882.graph_c0;c110319.graph_c0;c11206.graph_c0;c112555.graph_c0;c113284.graph_c0;c113851.g…	K01195+K00128+K00854+K00963+K00699+K00699+K00699+K00699+K00128+K00699+K00011+K00011+K01195+K00011+K00699+K00699+K00854+K00128+K00008+K00011+K00011+K00078+K00078+K00002+K03331+K00963+K00011+K00011+K00128+K00008+K00128+K00963+K00002+K00963+K00078+K00963+K00008+K00008+K00699+K00012+K00128+K00011+K01783+K00699+K00002+K00854+K00963+K00008+K00699+K00128+K00011+K00011+K00699+K00008+K00011+K00699+K00011+…
Fructose and mannose metabolism	ko00051	121	c100007.graph_c0;c100228.graph_c0;c101715.graph_c0;c104120.graph_c0;c104284.graph_c0;c104292.graph_c1;c104481.graph_c2;c104936.graph_c0;c105100.graph_c3;c105389.graph_c0;c106213.graph_c0;c108208.graph_c0;c108882.graph_c0;c110319.graph_c0;c111494.graph_c0;c11206.graph_c0;c116524.graph_c0;c116870.graph_c0;c121465.graph_c0;c125524.graph_c0;c125876.graph_c0;c126912.graph_c0;c131819.graph_c0;c132717.g…	K00844+K02377+K01623+K00011+K00011+K01623+K00846+K00850+K00844+K00011+K18334+K01809+K00008+K00011+K00966+K00011+K00011+K00011+K00008+K01623+K00850+K01803+K01623+K00008+K00008+K00966+K00011+K01623+K01623+K00850+K00008+K00011+K00011+K12661+K00844+K03841+K00966+K00008+K01103+K00011+K00844+K00844+K01711+K17497+K00011+K01809+K12661+K00008+K01103+K01803+K01103+K17497+K00011+K01623+K00844+K01809+K01103+…
TGF-beta signaling pathway	ko04350	118	c100269.graph_c0;c100459.graph_c0;c101008.graph_c0;c101200.graph_c0;c102110.graph_c0;c102807.graph_c0;c102969.graph_c2;c103276.graph_c0;c103553.graph_c0;c104166.graph_c0;c104416.graph_c0;c105698.graph_c10;c105698.graph_c12;c105698.graph_c8;c106293.graph_c3;c106568.graph_c2;c106581.graph_c1;c106792.graph_c0;c106991.graph_c0;c107136.graph_c1;c107160.graph_c0;c107160.graph_c1;c107526.graph_c3;c10820…	K04661+K03456+K04671+K04667+K04681+K03094+K04688+K04676+K04498+K04678+K04667+K04498+K04498+K04498+K04662+K04688+K04501+K04675+K13578+K04674+K16621+K16621+K04513+K04371+K03347+K04382+K03868+K04371+K04679+K04371+K13578+K04382+K04498+K03456+K04513+K03456+K04498+K03456+K04371+K03347+K04513+K03456+K03094+K04371+K03347+K03456+K04498+K03868+K03456+K03456+K04688+K04371+K03456+K04382+K03456+K03456+K03094+…
N-Glycan biosynthesis	ko00510	116	c100142.graph_c0;c100235.graph_c0;c100413.graph_c0;c100452.graph_c1;c101781.graph_c0;c101897.graph_c0;c103083.graph_c0;c103180.graph_c1;c103982.graph_c0;c105087.graph_c0;c105087.graph_c2;c105493.graph_c2;c105858.graph_c2;c106599.graph_c0;c107137.graph_c0;c107137.graph_c2;c107291.graph_c0;c107412.graph_c0;c108191.graph_c0;c108279.graph_c2;c108890.graph_c0;c110291.graph_c0;c110595.graph_c0;c111110.…	K12668+K03844+K12666+K01230+K12666+K03843+K03849+K00721+K07151+K05546+K05546+K07151+K12669+K00736+K03846+K03846+K03847+K01231+K07252+K03845+K12667+K12670+K03844+K12669+K12667+K12666+K03847+K03842+K01230+K01230+K05546+K03848+K01230+K03845+K00729+K12668+K00721+K12666+K07441+K03846+K01230+K12666+K12669+K01001+K00729+K07151+K01228+K12669+K03846+K00729+K12666+K03843+K05546+K01001+K00721+K03842+K05546+…
Galactose metabolism	ko00052	114	c100007.graph_c0;c101759.graph_c0;c101959.graph_c0;c103559.graph_c0;c103734.graph_c0;c103936.graph_c0;c104120.graph_c0;c104284.graph_c0;c104936.graph_c0;c105100.graph_c3;c105389.graph_c0;c106576.graph_c0;c106714.graph_c0;c107557.graph_c0;c107576.graph_c0;c107836.graph_c0;c110319.graph_c0;c111237.graph_c0;c111436.graph_c0;c11206.graph_c0;c112113.graph_c0;c113962.graph_c0;c114516.graph_c0;c116044.g…	K00844+K01187+K00963+K01785+K01187+K01785+K00011+K00011+K00850+K00844+K00011+K12316+K01187+K01784+K12309+K00849+K00011+K12316+K01784+K00011+K01784+K01784+K12309+K00963+K00011+K00011+K01784+K01785+K15779+K00850+K00963+K00963+K00963+K12309+K00011+K01784+K12407+K00850+K01835+K00963+K00011+K00011+K00844+K15779+K01203+K01785+K00011+K00844+K00844+K00011+K07407+K12309+K00011+K01784+K12047+K01229+K01835+…
ABC transporters	ko02010	109	c101795.graph_c0;c103430.graph_c0;c103529.graph_c0;c103861.graph_c0;c106379.graph_c0;c106379.graph_c1;c106448.graph_c0;c106627.graph_c0;c106919.graph_c1;c107770.graph_c0;c108062.graph_c0;c110531.graph_c0;c110999.graph_c0;c111238.graph_c0;c111344.graph_c0;c112326.graph_c0;c112397.graph_c0;c113967.graph_c0;c118883.graph_c0;c122331.graph_c0;c122771.graph_c0;c124701.graph_c0;c125020.graph_c0;c129738.…	K05662+K05665+K05676+K05665+K05673+K05673+K05673+K05648+K05668+K05658+K05657+K05662+K05673+K05676+K05676+K05665+K05676+K05658+K05666+K05660+K05658+K05665+K05665+K05658+K05641+K05665+K05658+K05658+K05658+K05661+K05658+K05676+K05658+K05658+K05676+K05666+K05681+K05676+K05657+K05658+K05657+K05674+K05657+K05681+K05658+K05658+K05665+K05661+K05684+K05673+K05661+K05658+K05677+K05661+K05666+K05676+K05677+…
Nucleotide excision repair	ko03420	109	c100321.graph_c0;c100411.graph_c0;c100517.graph_c0;c101282.graph_c0;c102363.graph_c0;c103230.graph_c4;c104902.graph_c0;c105023.graph_c0;c105118.graph_c0;c105922.graph_c0;c106224.graph_c1;c106642.graph_c0;c106736.graph_c0;c106736.graph_c1;c107247.graph_c0;c107363.graph_c0;c107399.graph_c0;c108456.graph_c0;c10970.graph_c0;c115359.graph_c0;c121380.graph_c0;c123502.graph_c0;c130720.graph_c0;c130972.g…	K03143+K10756+K03144+K06634+K10843+K10755+K02327+K10610+K10747+K10842+K10844+K07466+K10609+K10609+K10841+K10841+K10846+K07466+K10609+K03868+K10848+K10839+K10841+K10756+K10609+K10609+K10842+K02202+K10839+K10610+K10841+K03868+K10610+K02327+K10570+K02327+K10609+K02328+K10609+K10848+K10755+K02325+K10843+K10756+K10838+K10843+K03142+K10846+K10846+K07466+K07466+K10754+K10740+K10843+K10840+K03868+K10747+…
Pentose phosphate pathway	ko00030	108	c100291.graph_c0;c100390.graph_c0;c101011.graph_c0;c101715.graph_c0;c101876.graph_c1;c102454.graph_c0;c103127.graph_c0;c104292.graph_c1;c104936.graph_c0;c106594.graph_c0;c106682.graph_c0;c106915.graph_c0;c106915.graph_c1;c112258.graph_c0;c120576.graph_c0;c120652.graph_c0;c121735.graph_c0;c124609.graph_c0;c125524.graph_c0;c125876.graph_c0;c131819.graph_c0;c135386.graph_c0;c136090.graph_c0;c136145.…	K00616+K00852+K01619+K01623+K00036+K00036+K01810+K01623+K00850+K00033+K01810+K00615+K00615+K00948+K00033+K00948+K15779+K00852+K01623+K00850+K01623+K00036+K01057+K01783+K01057+K01623+K01623+K00850+K00033+K00033+K01835+K00615+K00033+K00852+K01807+K15779+K03841+K00852+K01810+K00616+K01619+K00036+K01810+K00036+K00615+K00036+K01835+K00616+K00033+K01623+K00033+K01810+K01053+K01810+K01623+K00616+K01807+…
DNA replication	ko03030	106	c100131.graph_c0;c100411.graph_c0;c103230.graph_c4;c103254.graph_c1;c103312.graph_c0;c104902.graph_c0;c105118.graph_c0;c105796.graph_c0;c106642.graph_c0;c106950.graph_c0;c107068.graph_c0;c107068.graph_c1;c107735.graph_c1;c107735.graph_c2;c108292.graph_c0;c108456.graph_c0;c111890.graph_c0;c117386.graph_c0;c122607.graph_c0;c128721.graph_c0;c130972.graph_c0;c133955.graph_c0;c137849.graph_c0;c138864.…	K02210+K10756+K10755+K03111+K02541+K02327+K10747+K02540+K07466+K02321+K02212+K02212+K02542+K02542+K02320+K07466+K10742+K02540+K02540+K02541+K10756+K02685+K02212+K02212+K02327+K02327+K02328+K02540+K10755+K02325+K02212+K02320+K10756+K03469+K02542+K02542+K02210+K02541+K02212+K02320+K07466+K07466+K10754+K02542+K10740+K10747+K04802+K10756+K02320+K07466+K02320+K02209+K10756+K07466+K02327+K02320+K10739+…
beta-Alanine metabolism	ko00410	101	c100320.graph_c0;c100800.graph_c1;c101558.graph_c0;c101608.graph_c0;c102803.graph_c0;c102803.graph_c1;c103075.graph_c0;c103568.graph_c0;c104012.graph_c0;c104024.graph_c0;c105240.graph_c0;c105947.graph_c0;c105989.graph_c5;c105989.graph_c7;c10632.graph_c0;c106520.graph_c2;c106606.graph_c0;c107224.graph_c1;c107360.graph_c0;c112359.graph_c0;c112453.graph_c0;c114599.graph_c0;c118920.graph_c0;c123342.g…	K07511+K01580+K00802+K00128+K01431+K01431+K00128+K00140+K00797+K08660+K01578+K00207+K01580+K01580+K00249+K00249+K01464+K14085+K00128+K00149+K00140+K00797+K00128+K00128+K07514+K00797+K01431+K00149+K00207+K05605+K00797+K13524+K00128+K00249+K00149+K00128+K01431+K07515+K00129+K01580+K07515+K13366+K00249+K00249+K00128+K00129+K00140+K00128+K01580+K01580+K00128+K08660+K00149+K00149+K05605+K00140+K00128+…
Phosphatidylinositol signaling system	ko04070	101	c100125.graph_c1;c100462.graph_c3;c100983.graph_c0;c101157.graph_c0;c101157.graph_c1;c102392.graph_c0;c103061.graph_c1;c103246.graph_c1;c104200.graph_c0;c104624.graph_c0;c105530.graph_c0;c105841.graph_c0;c105853.graph_c0;c106619.graph_c0;c106636.graph_c0;c106965.graph_c0;c107297.graph_c1;c107549.graph_c0;c107549.graph_c1;c107812.graph_c0;c107873.graph_c0;c108107.graph_c0;c108114.graph_c1;c108135.…	K00911+K02649+K00911+K05860+K05860+K00914+K02183+K05860+K00922+K00901+K00889+K00901+K01099+K01099+K01092+K05858+K01106+K01109+K01109+K00888+K00923+K04958+K05858+K00889+K01110+K00888+K01116+K01110+K00901+K00901+K00921+K00888+K05857+K01092+K01110+K05857+K01099+K00889+K02183+K02677+K01092+K13711+K00888+K00901+K01099+K00981+K00888+K00901+K00920+K00981+K00901+K00888+K00914+K01092+K00901+K05860+K02183+…
RNA polymerase	ko03020	98	c100020.graph_c1;c100040.graph_c0;c100041.graph_c0;c101287.graph_c1;c102942.graph_c0;c103248.graph_c0;c104488.graph_c0;c104952.graph_c0;c105199.graph_c1;c105680.graph_c0;c106527.graph_c2;c107856.graph_c0;c108131.graph_c0;c108376.graph_c2;c108775.graph_c1;c110636.graph_c0;c111621.graph_c0;c112508.graph_c0;c115365.graph_c0;c115453.graph_c0;c115487.graph_c0;c116502.graph_c0;c119360.graph_c0;c121171.…	K03025+K03015+K03013+K03010+K03009+K03010+K03016+K03021+K03010+K14721+K03023+K02999+K03002+K03006+K03010+K03008+K03006+K03002+K03007+K03006+K03010+K03002+K03009+K03021+K03018+K03022+K03010+K03010+K03020+K03002+K03010+K03010+K03018+K03002+K03002+K03002+K03018+K03006+K03002+K02999+K03010+K03018+K03013+K03018+K03021+K03006+K03027+K03006+K03012+K02999+K03011+K03010+K03007+K03002+K03018+K03010+K03010+…
Inositol phosphate metabolism	ko00562	97	c100125.graph_c1;c100983.graph_c0;c101157.graph_c0;c101157.graph_c1;c102392.graph_c0;c103246.graph_c1;c103266.graph_c0;c103568.graph_c0;c104103.graph_c0;c104185.graph_c0;c104200.graph_c0;c105530.graph_c0;c105853.graph_c0;c106141.graph_c0;c106141.graph_c1;c106619.graph_c0;c106636.graph_c0;c106965.graph_c0;c107297.graph_c1;c107549.graph_c0;c107549.graph_c1;c107812.graph_c0;c107873.graph_c0;c108114.…	K00911+K00911+K05860+K05860+K00914+K05860+K03103+K00140+K03103+K00010+K00922+K00889+K01099+K01858+K01858+K01099+K01092+K05858+K01106+K01109+K01109+K00888+K00923+K05858+K00889+K01110+K00888+K01116+K01110+K00921+K00888+K00140+K05857+K01092+K01110+K00469+K01803+K05857+K01099+K01858+K00889+K01092+K13711+K00888+K01099+K00888+K00920+K03103+K00888+K00914+K01092+K01858+K05860+K01858+K01858+K01803+K01099+…
Fatty acid biosynthesis	ko00061	91	c100026.graph_c0;c100182.graph_c0;c100253.graph_c0;c101289.graph_c0;c101704.graph_c0;c102819.graph_c0;c103108.graph_c1;c103371.graph_c0;c104440.graph_c0;c104928.graph_c0;c104978.graph_c0;c106119.graph_c0;c106713.graph_c0;c107770.graph_c1;c107786.graph_c0;c107887.graph_c2;c107887.graph_c3;c108437.graph_c1;c108437.graph_c2;c108805.graph_c1;c108805.graph_c2;c108805.graph_c3;c113489.graph_c0;c126292.…	K00665+K00665+K00665+K00665+K00665+K01897+K11262+K00665+K00665+K00665+K01897+K00665+K00665+K00665+K01897+K15013+K15013+K00665+K00665+K11262+K11262+K11262+K00665+K01897+K00665+K01897+K00665+K01897+K00665+K01897+K01897+K01897+K15013+K01897+K11262+K11262+K15013+K00665+K00665+K00665+K00665+K15013+K01897+K15013+K01897+K00665+K11262+K01897+K15013+K09458+K01897+K15013+K00645+K01897+K01897+K00665+K09458+…
Protein export	ko03060	91	c101026.graph_c0;c101503.graph_c0;c101553.graph_c0;c102160.graph_c0;c102839.graph_c0;c102859.graph_c0;c103803.graph_c2;c103819.graph_c0;c104653.graph_c0;c106852.graph_c1;c106982.graph_c0;c108913.graph_c0;c110534.graph_c0;c110979.graph_c0;c111723.graph_c0;c113210.graph_c0;c114598.graph_c0;c115131.graph_c0;c117111.graph_c0;c118043.graph_c0;c120663.graph_c0;c122000.graph_c0;c124023.graph_c0;c125659.…	K03104+K03106+K09490+K10956+K13431+K03107+K12272+K10956+K10956+K12948+K03108+K09481+K13280+K12275+K03217+K13280+K09490+K03106+K13431+K13280+K09481+K03108+K12946+K12948+K09490+K09490+K03106+K03107+K09481+K03106+K09490+K13431+K13280+K03107+K03108+K09647+K03106+K03107+K10956+K13431+K10956+K10956+K03107+K13431+K03108+K10956+K03105+K10956+K13280+K13431+K09490+K03217+K03217+K03108+K10956+K07342+K03106+…
Tyrosine metabolism	ko00350	86	c100677.graph_c2;c101579.graph_c0;c103481.graph_c0;c105101.graph_c0;c106255.graph_c0;c106436.graph_c1;c112842.graph_c0;c113905.graph_c0;c116713.graph_c0;c121121.graph_c0;c121411.graph_c0;c122542.graph_c0;c123451.graph_c0;c125003.graph_c0;c125486.graph_c0;c128840.graph_c0;c130528.graph_c0;c134393.graph_c0;c138039.graph_c0;c138801.graph_c0;c140654.graph_c0;c140822.graph_c0;c142416.graph_c0;c147269.…	K00457+K01555+K01593+K01593+K00501+K00121+K01555+K00451+K01555+K01800+K13952+K07253+K00501+K14455+K00121+K13951+K00121+K01593+K00815+K00121+K00121+K00121+K01555+K01555+K00129+K00121+K00457+K14454+K14455+K03334+K13953+K01593+K00129+K01593+K01593+K00815+K00121+K13953+K13953+K14454+K14454+K00121+K00121+K00121+K01555+K00457+K00451+K13953+K07253+K01555+K01557+K00121+K00815+K00121+K14455+K01557+K14455+…
Propanoate metabolism	ko00640	86	c100320.graph_c0;c101092.graph_c0;c102790.graph_c0;c102896.graph_c0;c102896.graph_c1;c103108.graph_c1;c103568.graph_c0;c103762.graph_c0;c104520.graph_c0;c105240.graph_c0;c105264.graph_c0;c10632.graph_c0;c106520.graph_c2;c106636.graph_c2;c108805.graph_c1;c108805.graph_c2;c108805.graph_c3;c109988.graph_c0;c112453.graph_c0;c113151.graph_c0;c113582.graph_c0;c120888.graph_c0;c121030.graph_c0;c123088.g…	K07511+K01899+K00626+K01895+K01895+K11262+K00140+K01900+K00626+K01578+K00626+K00249+K00249+K01895+K11262+K11262+K11262+K18369+K00140+K01895+K01895+K01895+K01899+K01900+K07514+K01900+K05605+K13524+K01900+K01895+K01895+K00249+K01895+K07515+K01895+K07515+K11262+K11262+K00016+K00626+K00249+K00249+K11262+K00140+K01900+K01900+K01908+K00016+K05605+K00140+K00626+K05605+K07511+K05605+K01895+K01900+K01899+…
Drug metabolism - other enzymes	ko00983	84	c100308.graph_c0;c100357.graph_c0;c101247.graph_c0;c101434.graph_c0;c102176.graph_c0;c102350.graph_c0;c102406.graph_c0;c102542.graph_c0;c102803.graph_c0;c102803.graph_c1;c102859.graph_c1;c102918.graph_c0;c103733.graph_c0;c104333.graph_c0;c105236.graph_c0;c105947.graph_c0;c106029.graph_c0;c106304.graph_c0;c106606.graph_c0;c106739.graph_c1;c107018.graph_c0;c108314.graph_c0;c112413.graph_c0;c113803.…	K01195+K01519+K00876+K00088+K00699+K01951+K00699+K00699+K01431+K01431+K13421+K00699+K00699+K01195+K00106+K00207+K00699+K00699+K01464+K13421+K00757+K00106+K00106+K01489+K01519+K00106+K13421+K00088+K01431+K00207+K01489+K00699+K13421+K13421+K00699+K00699+K01431+K00699+K00699+K00106+K03927+K00106+K00106+K00699+K13421+K00106+K00106+K01519+K00106+K00106+K00106+K13421+K00106+K01489+K00207+K13421+K00106+…
Basal transcription factors	ko03022	83	c100321.graph_c0;c100517.graph_c0;c100797.graph_c0;c101003.graph_c0;c101282.graph_c0;c102363.graph_c0;c102440.graph_c0;c103404.graph_c0;c104368.graph_c0;c104532.graph_c0;c104707.graph_c1;c104768.graph_c0;c105922.graph_c0;c106224.graph_c1;c106252.graph_c0;c106252.graph_c1;c107814.graph_c0;c107814.graph_c2;c108961.graph_c0;c111646.graph_c0;c120448.graph_c0;c124341.graph_c0;c125850.graph_c0;c132686.…	K03143+K03144+K03138+K03139+K06634+K10843+K03138+K03130+K03126+K03139+K03133+K03128+K10842+K10844+K03125+K03125+K03122+K03122+K03129+K03128+K03134+K03123+K03123+K03122+K03124+K03136+K10842+K02202+K03124+K03127+K03139+K03123+K10843+K10843+K03130+K03142+K03130+K03131+K03129+K03123+K03130+K03138+K03124+K03139+K03128+K03134+K10843+K03132+K10844+K03120+K10843+K03142+K03120+K03120+K03122+K10843+K03124+…
Hedgehog signaling pathway	ko04340	80	c100826.graph_c0;c101219.graph_c1;c102617.graph_c0;c104047.graph_c0;c104047.graph_c1;c104059.graph_c0;c104804.graph_c0;c106041.graph_c1;c106293.graph_c3;c106311.graph_c0;c106986.graph_c0;c107328.graph_c0;c108036.graph_c1;c108343.graph_c0;c108343.graph_c1;c114686.graph_c0;c116631.graph_c0;c117532.graph_c0;c120970.graph_c0;c122697.graph_c0;c124633.graph_c0;c125578.graph_c0;c132842.graph_c0;c134499.…	K06232+K08958+K06227+K00445+K00445+K04345+K06224+K06234+K04662+K06228+K06226+K06233+K06225+K16799+K16799+K08957+K03083+K06233+K06233+K06233+K06233+K08960+K08960+K03083+K06233+K04345+K06233+K04345+K08959+K03083+K06233+K08960+K03083+K06233+K03083+K06233+K06233+K08957+K06233+K03362+K04345+K06233+K03083+K06233+K03362+K03083+K08958+K08958+K08960+K06233+K06229+K03083+K06233+K06233+K08957+K08960+K03083+…
Metabolism of xenobiotics by cytochrome P450	ko00980	78	c100198.graph_c0;c101453.graph_c0;c101463.graph_c0;c102176.graph_c0;c102406.graph_c0;c102542.graph_c0;c102918.graph_c0;c103733.graph_c0;c104371.graph_c0;c106029.graph_c0;c106304.graph_c0;c106436.graph_c1;c107128.graph_c2;c11025.graph_c0;c110773.graph_c0;c112555.graph_c0;c113284.graph_c0;c118407.graph_c0;c119292.graph_c0;c121411.graph_c0;c124998.graph_c0;c125486.graph_c0;c126940.graph_c0;c128840.g…	K00799+K00799+K00799+K00699+K00699+K00699+K00699+K00699+K00799+K00699+K00699+K00121+K00799+K07408+K07408+K00078+K00078+K15303+K00799+K13952+K00799+K00121+K00799+K13951+K00078+K00121+K00699+K00799+K00699+K00121+K00121+K00121+K00699+K00699+K00129+K00121+K00699+K00799+K00081+K13953+K00699+K00078+K00799+K00799+K00129+K00079+K00121+K13953+K13953+K00121+K00121+K00121+K07408+K13953+K00121+K00121+K00799+…
Biosynthesis of unsaturated fatty acids	ko01040	78	c100095.graph_c0;c101457.graph_c0;c101672.graph_c0;c102126.graph_c0;c103594.graph_c0;c105215.graph_c0;c10555.graph_c0;c105850.graph_c0;c106451.graph_c0;c108253.graph_c0;c109255.graph_c0;c115096.graph_c0;c115391.graph_c0;c117173.graph_c0;c117329.graph_c0;c117379.graph_c0;c117903.graph_c0;c119767.graph_c0;c120869.graph_c0;c125384.graph_c0;c127011.graph_c0;c129065.graph_c0;c130142.graph_c0;c131098.g…	K00507+K00507+K00507+K10256+K10703+K10251+K10226+K00507+K00232+K00232+K07513+K10703+K10256+K10257+K00232+K07513+K10703+K00232+K10251+K00232+K10251+K00507+K10258+K07513+K07513+K00232+K10703+K00232+K00507+K10703+K10257+K00232+K00507+K07513+K07515+K07515+K10257+K00232+K00232+K10251+K00507+K00232+K07513+K07513+K00232+K07513+K10251+K00232+K10258+K00507+K10251+K10251+K07513+K00232+K00232+K10256+K00232+…
Terpenoid backbone biosynthesis	ko00900	77	c101108.graph_c0;c101907.graph_c0;c102334.graph_c1;c102343.graph_c0;c102790.graph_c0;c104520.graph_c0;c105264.graph_c0;c105410.graph_c4;c105872.graph_c0;c106538.graph_c3;c106922.graph_c0;c107370.graph_c0;c107446.graph_c0;c107446.graph_c1;c110523.graph_c0;c110525.graph_c0;c110654.graph_c0;c114213.graph_c0;c114645.graph_c0;c116978.graph_c0;c120071.graph_c0;c120432.graph_c0;c124434.graph_c0;c124969.…	K05906+K01597+K01641+K00021+K00626+K00626+K00626+K00587+K00787+K12504+K05955+K01823+K00021+K00021+K01641+K06013+K01641+K01641+K06013+K11778+K01641+K11778+K05906+K06013+K00787+K00021+K05954+K01597+K00787+K01823+K00804+K01597+K00804+K11778+K01823+K00021+K00787+K00626+K01597+K00021+K01597+K01641+K01597+K05954+K00804+K06013+K00626+K01823+K06013+K01641+K00787+K00021+K06013+K00787+K00787+K11778+K01823+…
Porphyrin and chlorophyll metabolism	ko00860	76	c100308.graph_c0;c100497.graph_c0;c102176.graph_c0;c102284.graph_c0;c102406.graph_c0;c102542.graph_c0;c102833.graph_c0;c102918.graph_c0;c102964.graph_c0;c103451.graph_c0;c103733.graph_c0;c104190.graph_c0;c104320.graph_c0;c104333.graph_c0;c105800.graph_c0;c105969.graph_c0;c106029.graph_c0;c106292.graph_c1;c106304.graph_c0;c110538.graph_c0;c112170.graph_c0;c116815.graph_c0;c116952.graph_c0;c132254.…	K01195+K14163+K00699+K14163+K00699+K00699+K00643+K00699+K14163+K01698+K00699+K00228+K00231+K01195+K01885+K01599+K00699+K00643+K00699+K01599+K02259+K14163+K14163+K00228+K00699+K00510+K00699+K00228+K00699+K00228+K00699+K00510+K00699+K14163+K00228+K14163+K14163+K00699+K14163+K01599+K00643+K00228+K01772+K02259+K01764+K01698+K00228+K00643+K02257+K01698+K02259+K02259+K14163+K14163+K02259+K01599+K14163+…
One carbon pool by folate	ko00670	74	c101093.graph_c0;c101789.graph_c0;c102496.graph_c0;c102584.graph_c0;c103154.graph_c0;c103789.graph_c0;c104136.graph_c0;c104913.graph_c0;c104913.graph_c1;c106868.graph_c0;c108214.graph_c0;c108531.graph_c2;c111871.graph_c0;c115092.graph_c0;c115652.graph_c0;c116573.graph_c0;c117486.graph_c0;c118339.graph_c0;c127670.graph_c0;c133939.graph_c0;c138982.graph_c0;c141303.graph_c0;c144178.graph_c0;c154207.…	K00600+K00602+K00600+K00604+K00602+K00297+K00605+K00288+K00288+K00288+K11787+K00289+K01934+K00297+K00288+K11787+K00297+K00297+K00297+K00297+K00288+K00600+K00604+K00600+K00288+K00288+K00605+K00288+K00600+K00600+K00560+K00288+K00297+K00288+K00297+K00548+K00600+K13402+K00605+K00560+K11787+K11787+K00560+K00288+K13403+K00600+K00560+K00288+K00297+K00288+K00602+K00288+K00297+K00288+K00288+K13402+K00288+…
Retinol metabolism	ko00830	73	c101915.graph_c0;c102176.graph_c0;c102269.graph_c0;c102406.graph_c0;c102542.graph_c0;c102918.graph_c0;c103733.graph_c0;c106029.graph_c0;c106304.graph_c0;c106436.graph_c1;c109018.graph_c0;c11025.graph_c0;c110773.graph_c0;c111792.graph_c0;c121411.graph_c0;c121665.graph_c0;c122270.graph_c0;c125486.graph_c0;c127386.graph_c0;c128840.graph_c0;c130528.graph_c0;c131431.graph_c0;c13359.graph_c0;c136187.gr…	K07437+K00699+K11147+K00699+K00699+K00699+K00699+K00699+K00699+K00121+K11155+K07408+K07408+K07424+K13952+K07249+K09516+K00121+K07424+K13951+K00121+K11147+K00699+K07249+K00699+K00121+K00121+K00121+K00699+K00699+K00121+K00699+K12665+K11147+K13953+K11147+K00699+K17687+K12665+K00121+K13953+K13953+K17691+K11146+K00121+K00121+K00121+K07408+K13953+K09516+K00121+K00121+K07424+K00699+K15734+K11147+K11155+…
Drug metabolism - cytochrome P450	ko00982	70	c100198.graph_c0;c101453.graph_c0;c101463.graph_c0;c102176.graph_c0;c102406.graph_c0;c102542.graph_c0;c102918.graph_c0;c103733.graph_c0;c104371.graph_c0;c106029.graph_c0;c106304.graph_c0;c106436.graph_c1;c107128.graph_c2;c119292.graph_c0;c121411.graph_c0;c124998.graph_c0;c125486.graph_c0;c126940.graph_c0;c128840.graph_c0;c130528.graph_c0;c13359.graph_c0;c134311.graph_c0;c137014.graph_c0;c138801.g…	K00799+K00799+K00799+K00699+K00699+K00699+K00699+K00699+K00799+K00699+K00699+K00121+K00799+K00799+K13952+K00799+K00121+K00799+K13951+K00121+K00699+K00799+K00699+K00121+K00121+K00121+K00699+K00699+K00129+K00121+K00699+K00799+K00485+K13953+K00699+K00799+K00799+K00129+K00121+K13953+K13953+K00121+K00121+K00121+K13953+K00121+K00121+K00799+K00699+K00799+K00799+K00799+K00799+K00274+K00485+K13953+K00699+…
MAPK signaling pathway	ko04010	70	c101405.graph_c0;c101405.graph_c1;c109101.graph_c0;c111594.graph_c0;c113528.graph_c0;c116488.graph_c0;c117989.graph_c0;c118974.graph_c0;c120193.graph_c0;c120544.graph_c0;c122224.graph_c0;c122490.graph_c0;c124468.graph_c0;c125973.graph_c0;c129304.graph_c0;c132057.graph_c0;c135221.graph_c0;c135599.graph_c0;c137569.graph_c0;c138102.graph_c0;c141243.graph_c0;c141845.graph_c0;c141976.graph_c0;c143439.…	K03283+K03283+K03283+K04428+K04466+K04456+K03283+K04348+K03283+K04371+K03283+K03283+K03283+K04457+K07827+K16342+K04373+K04441+K04345+K03283+K04461+K04416+K07860+K03283+K04367+K07830+K04459+K04424+K03283+K04456+K04468+K04371+K04460+K04410+K04464+K03283+K04459+K03283+K04345+K04464+K03283+K04368+K04362+K04441+K04441+K04348+K04367+K04420+K04392+K04456+K04851+K03283+K04393+K03283+K16342+K04348+K04460+…
Sphingolipid metabolism	ko00600	68	c100284.graph_c0;c100327.graph_c0;c101267.graph_c0;c101369.graph_c0;c101605.graph_c0;c101772.graph_c0;c101912.graph_c0;c102072.graph_c0;c10296.graph_c0;c103134.graph_c0;c103590.graph_c0;c103809.graph_c0;c104931.graph_c0;c104931.graph_c1;c106866.graph_c0;c106992.graph_c1;c107257.graph_c1;c107576.graph_c0;c108693.graph_c0;c109111.graph_c0;c110982.graph_c0;c111996.graph_c0;c114516.graph_c0;c115788.g…	K00720+K12351+K17108+K04712+K01634+K04716+K12353+K01634+K12351+K00654+K17108+K12350+K12349+K12349+K12350+K00654+K04714+K12309+K04715+K01441+K01634+K04710+K12309+K01634+K04710+K00654+K00720+K12309+K04718+K12349+K00654+K01634+K07407+K01634+K12309+K12349+K00654+K01634+K17108+K04710+K04711+K12350+K00654+K04715+K01634+K07407+K12309+K12309+K12350+K12350+K04710+K12309+K00654+K12350+K04714+K04711+K04714+…
Ascorbate and aldarate metabolism	ko00053	66	c101608.graph_c0;c102176.graph_c0;c102406.graph_c0;c102542.graph_c0;c102918.graph_c0;c103075.graph_c0;c103733.graph_c0;c106029.graph_c0;c106304.graph_c0;c107224.graph_c1;c107360.graph_c0;c112359.graph_c0;c118920.graph_c0;c123342.graph_c0;c123646.graph_c0;c123948.graph_c0;c129363.graph_c0;c13359.graph_c0;c134574.graph_c0;c134867.graph_c0;c137014.graph_c0;c138380.graph_c0;c144326.graph_c0;c144485.g…	K00128+K00699+K00699+K00699+K00699+K00128+K00699+K00699+K00699+K14085+K00128+K00149+K00128+K00128+K00103+K00469+K00149+K00699+K00012+K00128+K00699+K00149+K00699+K00128+K00699+K00699+K00012+K00699+K00128+K00128+K00128+K00128+K00012+K00012+K00149+K18649+K00149+K01053+K00128+K00128+K00012+K00128+K00128+K00128+K00699+K00128+K00128+K00103+K01053+K01053+K00128+K00128+K00128+K00128+K00012+K00128+K00128+…
Steroid biosynthesis	ko00100	63	c102408.graph_c0;c102416.graph_c0;c102493.graph_c0;c102805.graph_c0;c104835.graph_c0;c106900.graph_c0;c114945.graph_c0;c117324.graph_c0;c120377.graph_c0;c128225.graph_c0;c130278.graph_c0;c138590.graph_c0;c139372.graph_c0;c143323.graph_c0;c145186.graph_c0;c146627.graph_c0;c147394.graph_c0;c148255.graph_c0;c150380.graph_c0;c151894.graph_c0;c152226.graph_c0;c155488.graph_c0;c158751.graph_c0;c160926.…	K00227+K00511+K05917+K00637+K01852+K09828+K00227+K00511+K01852+K01852+K09828+K05917+K00559+K00559+K00801+K01852+K09828+K00222+K00213+K00801+K01852+K00801+K00213+K00511+K00801+K01852+K00559+K00559+K00511+K01824+K00559+K05917+K00227+K00227+K09828+K00213+K05917+K01852+K07750+K05917+K00511+K00511+K00222+K01852+K00559+K07750+K07750+K00559+K05917+K01052+K00227+K00213+K00801+K07748+K05917+K00511+K07750+…
Notch signaling pathway	ko04330	63	c101649.graph_c0;c101717.graph_c0;c103553.graph_c0;c105271.graph_c4;c105698.graph_c10;c105698.graph_c12;c105698.graph_c8;c105752.graph_c2;c106081.graph_c0;c106432.graph_c0;c106966.graph_c2;c106966.graph_c3;c107483.graph_c2;c107483.graph_c4;c107705.graph_c0;c107705.graph_c1;c107789.graph_c0;c107789.graph_c1;c108487.graph_c0;c108710.graph_c0;c108798.graph_c0;c108798.graph_c1;c108798.graph_c2;c10879…	K04496+K06067+K04498+K06062+K04498+K04498+K04498+K02353+K05948+K06063+K06057+K06057+K06051+K06051+K06062+K06062+K06052+K06052+K06053+K06059+K02599+K02599+K02599+K02599+K02599+K06063+K04498+K06172+K04498+K04498+K06067+K06067+K04496+K06067+K05948+K04498+K06063+K06053+K04498+K04498+K06066+K05948+K06052+K06052+K06062+K06052+K06171+K06171+K04496+K04505+K06065+K06067+K06062+K06067+K06062+K06067+K04498+…
Butanoate metabolism	ko00650	62	c100320.graph_c0;c100800.graph_c1;c102334.graph_c1;c102727.graph_c1;c102790.graph_c0;c104520.graph_c0;c105264.graph_c0;c105989.graph_c5;c105989.graph_c7;c106571.graph_c0;c110523.graph_c0;c110654.graph_c0;c111878.graph_c0;c114213.graph_c0;c114808.graph_c0;c116100.graph_c0;c120071.graph_c0;c120815.graph_c0;c124627.graph_c0;c127417.graph_c0;c132656.graph_c0;c134082.graph_c0;c145285.graph_c0;c147893.…	K07511+K01580+K01641+K00109+K00626+K00626+K00626+K01580+K01580+K00248+K01641+K01641+K00139+K01641+K01640+K00139+K01641+K00019+K07514+K01640+K00139+K13524+K00022+K07515+K01580+K01027+K07515+K01027+K00139+K00626+K01907+K01641+K00139+K01580+K01580+K00626+K01027+K07511+K00139+K00139+K01641+K07514+K07515+K00139+K00022+K13524+K00139+K13524+K16871+K01027+K07511+K01580+K00626+K01580+K00626+K13524+K13524+…
Mismatch repair	ko03430	62	c100411.graph_c0;c102330.graph_c0;c103230.graph_c4;c103254.graph_c1;c103316.graph_c0;c104902.graph_c0;c105118.graph_c0;c105585.graph_c0;c106642.graph_c0;c107393.graph_c0;c107615.graph_c0;c108456.graph_c0;c115561.graph_c0;c127616.graph_c0;c130972.graph_c0;c132795.graph_c0;c140127.graph_c0;c142026.graph_c0;c142254.graph_c0;c143034.graph_c0;c143777.graph_c0;c145876.graph_c0;c152519.graph_c0;c153098.…	K10756+K08734+K10755+K03111+K08737+K02327+K10747+K10746+K07466+K08735+K10858+K07466+K08734+K08737+K10756+K08736+K02327+K02327+K02328+K08737+K08736+K10755+K10746+K10756+K07466+K07466+K10754+K10740+K10747+K04802+K08736+K10756+K07466+K10756+K07466+K08735+K08737+K08737+K02327+K10739+K08734+K10746+K10746+K04802+K10755+K02327+K10754+K10754+K08737+K02328+K10754+K10754+K10739+K10756+K10755+K07466+K02328+…
Regulation of autophagy	ko04140	62	c100344.graph_c0;c101378.graph_c0;c102392.graph_c0;c103987.graph_c0;c105610.graph_c0;c108183.graph_c0;c108183.graph_c1;c108237.graph_c0;c108556.graph_c0;c11073.graph_c0;c111722.graph_c0;c113930.graph_c0;c114669.graph_c0;c121824.graph_c0;c123155.graph_c0;c128460.graph_c0;c128654.graph_c0;c134787.graph_c0;c139212.graph_c0;c147823.graph_c0;c148047.graph_c0;c152149.graph_c0;c156250.graph_c0;c160694.g…	K08332+K07198+K00914+K07198+K17888+K08333+K08333+K08331+K17889+K08331+K08337+K08343+K07198+K07198+K08341+K07198+K08332+K08337+K08342+K08342+K08334+K00914+K08343+K08269+K08343+K08337+K00914+K08341+K08332+K07198+K07198+K00914+K07198+K07198+K08332+K08341+K08341+K08343+K08342+K08337+K08337+K08341+K07198+K08269+K08269+K07198+K07198+K08341+K08341+K07198+K08336+K08269+K08269+K08339+K08341+K08342+K08334+…
Dorso-ventral axis formation	ko04320	61	c101408.graph_c0;c102374.graph_c0;c102574.graph_c0;c102574.graph_c1;c103215.graph_c1;c103254.graph_c0;c103254.graph_c3;c103882.graph_c0;c104463.graph_c0;c104722.graph_c0;c105072.graph_c0;c105076.graph_c1;c105487.graph_c0;c107795.graph_c0;c108209.graph_c0;c108359.graph_c0;c108359.graph_c1;c108471.graph_c2;c108758.graph_c1;c108798.graph_c0;c108798.graph_c1;c108798.graph_c2;c108798.graph_c3;c108798.…	K02175+K02156+K02360+K02360+K02177+K03211+K03211+K02156+K02156+K02602+K02360+K03102+K03099+K02156+K04371+K04361+K04361+K02644+K04364+K02599+K02599+K02599+K02599+K02599+K02156+K02174+K04371+K04371+K07827+K04371+K04371+K03099+K04371+K04368+K02678+K03099+K04368+K02156+K04364+K04364+K02098+K04371+K04371+K02156+K02156+K02156+K02156+K02174+K04371+K02156+K02359+K03102+K04371+K02174+K03102+K02678+K04368+…
Fanconi anemia pathway	ko03460	60	c100012.graph_c0;c101798.graph_c0;c101855.graph_c0;c101976.graph_c0;c101976.graph_c2;c102330.graph_c0;c103156.graph_c0;c103320.graph_c0;c103673.graph_c0;c104292.graph_c0;c104448.graph_c5;c105440.graph_c0;c105500.graph_c0;c105854.graph_c0;c106057.graph_c0;c106057.graph_c1;c106642.graph_c0;c106995.graph_c0;c107544.graph_c0;c107615.graph_c0;c107715.graph_c0;c108050.graph_c0;c108261.graph_c1;c108278.…	K11832+K03510+K10901+K04482+K04482+K08734+K10882+K03165+K03165+K15078+K10901+K03515+K03509+K15363+K10605+K10605+K07466+K10891+K06640+K10858+K15362+K10896+K15361+K10901+K10895+K07466+K02350+K03515+K08734+K10848+K11832+K10901+K10848+K10901+K10901+K07466+K02350+K15361+K07466+K10740+K06640+K07466+K07466+K10739+K08734+K03515+K02350+K02350+K10848+K03515+K10739+K13960+K07466+K10739+K10739+K10848+K06640+…
Cell cycle	ko04110	59	c100131.graph_c0;c102354.graph_c0;c112601.graph_c0;c113225.graph_c0;c115503.graph_c0;c116631.graph_c0;c116645.graph_c0;c120027.graph_c0;c126681.graph_c0;c128721.graph_c0;c129591.graph_c0;c130655.graph_c0;c134214.graph_c0;c138324.graph_c0;c139321.graph_c0;c139328.graph_c0;c140693.graph_c0;c141823.graph_c0;c142671.graph_c0;c144739.graph_c0;c147065.graph_c0;c151334.graph_c0;c155385.graph_c0;c155866.…	K02210+K06627+K02365+K06630+K03364+K03083+K06630+K06630+K06627+K02541+K03363+K03363+K03363+K06067+K16197+K06067+K02537+K05868+K05868+K02540+K02212+K05868+K02542+K06627+K06067+K02210+K02212+K06639+K02542+K03350+K06631+K06670+K04802+K06640+K06630+K05868+K02206+K02209+K05868+K05868+K02210+K05868+K02541+K13728+K06067+K06636+K03083+K03094+K02209+K03094+K02216+K03083+K02216+K02212+K06636+K06630+K06630+…
Histidine metabolism	ko00340	57	c101608.graph_c0;c103075.graph_c0;c103481.graph_c0;c104024.graph_c0;c105101.graph_c0;c107224.graph_c1;c107360.graph_c0;c108463.graph_c0;c112359.graph_c0;c114278.graph_c0;c118920.graph_c0;c123342.graph_c0;c129363.graph_c0;c131006.graph_c0;c134393.graph_c0;c134867.graph_c0;c138380.graph_c0;c144485.graph_c0;c148538.graph_c0;c158878.graph_c0;c165239.graph_c0;c166964.graph_c0;c167267.graph_c0;c168546.…	K00128+K00128+K01593+K08660+K01593+K14085+K00128+K01590+K00149+K04486+K00128+K00128+K00149+K04486+K01593+K00128+K00149+K00128+K00129+K01663+K01593+K00128+K00129+K01593+K01593+K00128+K00128+K01663+K00128+K01663+K08660+K00149+K18649+K00149+K00128+K00128+K01663+K00128+K00128+K00128+K08660+K00128+K00128+K00128+K00128+K00274+K00128+K00128+K00128+K00128+K01663+K08660+K00129+K08660+K14085+K01593+K00128
Oocyte meiosis	ko04114	57	c102883.graph_c0;c103061.graph_c1;c111220.graph_c0;c112601.graph_c0;c113225.graph_c0;c116645.graph_c0;c118974.graph_c0;c120027.graph_c0;c120544.graph_c0;c122451.graph_c0;c125708.graph_c0;c129591.graph_c0;c130655.graph_c0;c132404.graph_c0;c134214.graph_c0;c135221.graph_c0;c135271.graph_c0;c137569.graph_c0;c139321.graph_c0;c140693.graph_c0;c141823.graph_c0;c142671.graph_c0;c144347.graph_c0;c151334.…	K06269+K02183+K04382+K02365+K06630+K06630+K04348+K06630+K04371+K06269+K03456+K03363+K03363+K02183+K03363+K04373+K11584+K04345+K16197+K02537+K05868+K05868+K04367+K05868+K03362+K04345+K11584+K11481+K03350+K06269+K11481+K06631+K03362+K04348+K04367+K06630+K05868+K02206+K03456+K05868+K06269+K02183+K13728+K06636+K03094+K04348+K03094+K02183+K02183+K06269+K06636+K06630+K02183+K06630+K02183+K02183+K02206
Insulin signaling pathway	ko04910	55	c100179.graph_c0;c102883.graph_c0;c103061.graph_c1;c103108.graph_c1;c116488.graph_c0;c116631.graph_c0;c117002.graph_c0;c120544.graph_c0;c122451.graph_c0;c132404.graph_c0;c135825.graph_c0;c137569.graph_c0;c140253.graph_c0;c147770.graph_c0;c150237.graph_c0;c152294.graph_c0;c15714.graph_c0;c162462.graph_c0;c165834.graph_c0;c16986.graph_c0;c17176.graph_c0;c171838.graph_c0;c173174.graph_c0;c179059.gra…	K07200+K06269+K02183+K11262+K04456+K03083+K07199+K04371+K06269+K02183+K07197+K04345+K12407+K04456+K03841+K00844+K11262+K02991+K02991+K07203+K04345+K07189+K00665+K07191+K06269+K00688+K00693+K04688+K04688+K06276+K04456+K06269+K02183+K11262+K12407+K03083+K11262+K07191+K11262+K07198+K02183+K02183+K03083+K06269+K02183+K02991+K00693+K03259+K00844+K03083+K02991+K02991+K02183+K02183+K00693
Selenocompound metabolism	ko00450	52	c100811.graph_c0;c100816.graph_c1;c101417.graph_c0;c102151.graph_c0;c105830.graph_c0;c105883.graph_c1;c107092.graph_c0;c111166.graph_c0;c113824.graph_c0;c114393.graph_c0;c120391.graph_c0;c124745.graph_c0;c126672.graph_c0;c131249.graph_c0;c134781.graph_c0;c136775.graph_c0;c138795.graph_c0;c139843.graph_c0;c142243.graph_c0;c144360.graph_c0;c148347.graph_c0;c151237.graph_c0;c15325.graph_c0;c156913.g…	K00384+K01874+K00816+K01758+K01874+K01008+K13811+K01874+K01758+K01874+K01758+K00816+K00549+K01758+K01874+K00384+K01008+K00816+K01758+K13811+K13811+K00816+K01008+K00549+K01874+K00384+K13811+K01874+K00549+K00816+K00548+K01758+K01758+K01758+K00384+K13811+K01758+K00816+K01874+K01758+K00816+K00816+K00549+K01758+K01758+K00816+K01874+K00549+K13811+K01758+K01758+K01758
Homologous recombination	ko03440	51	c101855.graph_c0;c101976.graph_c0;c101976.graph_c2;c103156.graph_c0;c103254.graph_c1;c103320.graph_c0;c103411.graph_c0;c103673.graph_c0;c104448.graph_c5;c104902.graph_c0;c106642.graph_c0;c106760.graph_c0;c106760.graph_c1;c107061.graph_c1;c107918.graph_c0;c108278.graph_c0;c108456.graph_c0;c120782.graph_c0;c140127.graph_c0;c142026.graph_c0;c142057.graph_c0;c142254.graph_c0;c146266.graph_c0;c149340.…	K10901+K04482+K04482+K10882+K03111+K03165+K10875+K03165+K10901+K02327+K07466+K10867+K10867+K10877+K10865+K10901+K07466+K10875+K02327+K02327+K10901+K02328+K10865+K10901+K10866+K10866+K10866+K10901+K10866+K07466+K07466+K10877+K10740+K10865+K10865+K07466+K07466+K02327+K10739+K10881+K10873+K02327+K10881+K02328+K10739+K07466+K02328+K10739+K10739+K10866+K10740
Phenylalanine metabolism	ko00360	50	c100568.graph_c0;c100677.graph_c2;c103481.graph_c0;c103726.graph_c1;c105101.graph_c0;c113626.graph_c0;c122542.graph_c0;c125003.graph_c0;c134393.graph_c0;c138039.graph_c0;c144571.graph_c0;c148538.graph_c0;c151037.graph_c0;c155277.graph_c0;c155416.graph_c0;c156287.graph_c0;c157365.graph_c0;c165239.graph_c0;c167267.graph_c0;c168546.graph_c0;c170462.graph_c0;c176918.graph_c0;c180221.graph_c0;c180371.…	K00500+K00457+K01593+K11188+K01593+K11188+K07253+K14455+K01593+K00815+K10775+K00129+K00457+K14454+K10775+K14455+K03334+K01593+K00129+K01593+K01593+K00815+K14454+K14454+K00457+K07253+K00815+K14455+K14455+K14455+K11188+K00815+K03334+K14455+K00274+K14455+K00815+K10775+K14455+K14455+K14454+K00129+K14455+K14455+K14455+K14455+K00430+K00500+K01593+K14454
Nicotinate and nicotinamide metabolism	ko00760	50	c101098.graph_c1;c103037.graph_c0;c106179.graph_c0;c106380.graph_c0;c107708.graph_c0;c107708.graph_c1;c108032.graph_c1;c109757.graph_c0;c11799.graph_c0;c119303.graph_c0;c12085.graph_c0;c124721.graph_c0;c125777.graph_c0;c127431.graph_c0;c135331.graph_c0;c135526.graph_c0;c145635.graph_c0;c150015.graph_c0;c155419.graph_c0;c156728.graph_c0;c160501.graph_c0;c162668.graph_c0;c164620.graph_c0;c173512.gr…	K00858+K01081+K01950+K01081+K06210+K06210+K00763+K00767+K00858+K01950+K00858+K01950+K03783+K00323+K00858+K00323+K01513+K00323+K00323+K00323+K06210+K06210+K01081+K01081+K01081+K00858+K01950+K00858+K01081+K00323+K03783+K01950+K06210+K01950+K01950+K01950+K00323+K03783+K00858+K01081+K01081+K03783+K03426+K03426+K10524+K00767+K01950+K03783+K00858+K01081
Jak-STAT signaling pathway	ko04630	50	c100462.graph_c3;c102287.graph_c0;c103401.graph_c0;c103553.graph_c0;c104200.graph_c0;c105487.graph_c0;c105698.graph_c10;c105698.graph_c12;c105698.graph_c8;c105711.graph_c0;c106340.graph_c0;c106598.graph_c0;c107312.graph_c0;c107312.graph_c1;c108368.graph_c0;c108758.graph_c1;c116488.graph_c0;c121847.graph_c0;c128117.graph_c0;c135781.graph_c0;c136639.graph_c0;c140927.graph_c0;c147770.graph_c0;c15002…	K02649+K04447+K04698+K04498+K00922+K03099+K04498+K04498+K04498+K16064+K11224+K07293+K04700+K04700+K04707+K04364+K04456+K04498+K04498+K04498+K04456+K03099+K04456+K07293+K04695+K04498+K04498+K04498+K03099+K07293+K04705+K04700+K04364+K11224+K04364+K04456+K04456+K04705+K04706+K04498+K04377+K02649+K05061+K17383+K16064+K04456+K04377+K04377+K04703+K10151
Other types of O-glycan biosynthesis	ko00514	49	c100543.graph_c0;c101953.graph_c0;c103132.graph_c0;c103745.graph_c0;c104736.graph_c0;c105865.graph_c0;c106081.graph_c0;c107357.graph_c0;c107566.graph_c0;c107662.graph_c0;c107662.graph_c1;c111808.graph_c0;c129338.graph_c0;c132337.graph_c0;c145496.graph_c0;c157469.graph_c0;c159545.graph_c0;c159961.graph_c0;c163021.graph_c0;c166698.graph_c0;c167271.graph_c0;c167485.graph_c0;c169485.graph_c0;c171229.…	K13675+K00728+K13667+K00728+K00728+K00728+K05948+K18134+K09667+K00728+K00728+K00728+K00728+K00728+K09667+K09667+K05948+K00728+K09667+K00728+K00728+K09667+K05948+K09667+K09667+K09667+K09667+K09667+K09667+K09667+K09667+K00728+K00728+K00728+K09667+K00728+K00728+K00728+K09667+K00728+K00728+K00728+K00728+K00728+K00728+K00728+K11703+K00728+K03691
Fatty acid elongation	ko00062	48	c100320.graph_c0;c102303.graph_c0;c102303.graph_c1;c102444.graph_c0;c102772.graph_c0;c103594.graph_c0;c105215.graph_c0;c111651.graph_c0;c115096.graph_c0;c117903.graph_c0;c118231.graph_c0;c120869.graph_c0;c127011.graph_c0;c130142.graph_c0;c134658.graph_c0;c137314.graph_c0;c139945.graph_c0;c141159.graph_c0;c145285.graph_c0;c147893.graph_c0;c154138.graph_c0;c15777.graph_c0;c160457.graph_c0;c163795.g…	K07511+K07509+K07509+K01074+K07512+K10703+K10251+K07512+K10703+K10703+K07512+K10251+K10251+K10258+K07509+K10703+K10703+K01074+K00022+K07515+K07515+K01074+K10251+K07508+K10251+K07508+K10258+K07508+K07511+K10251+K10251+K07512+K07509+K10249+K07515+K10258+K10258+K00022+K07508+K10703+K10258+K07511+K07512+K10251+K10703+K07512+K10258+K07515
Nitrogen metabolism	ko00910	47	c100835.graph_c0;c103128.graph_c0;c103583.graph_c0;c103583.graph_c1;c103583.graph_c2;c105076.graph_c0;c105523.graph_c0;c107383.graph_c0;c112928.graph_c0;c115271.graph_c0;c123674.graph_c0;c125977.graph_c0;c128405.graph_c0;c128861.graph_c0;c128951.graph_c0;c133292.graph_c0;c135503.graph_c0;c136956.graph_c0;c149650.graph_c0;c150181.graph_c0;c150704.graph_c0;c152146.graph_c0;c154456.graph_c0;c162433.…	K00262+K15371+K01672+K01672+K01672+K01915+K01672+K00264+K00262+K01501+K01948+K01948+K01915+K00264+K00261+K01948+K01672+K00261+K00264+K01672+K00264+K01915+K00264+K01915+K01501+K00264+K00264+K00264+K00264+K01948+K01501+K01915+K01672+K00262+K00261+K01725+K01672+K01672+K01915+K01915+K01915+K00261+K01672+K00264+K01915+K15371+K01672
Base excision repair	ko03410	46	c101702.graph_c0;c101702.graph_c1;c104600.graph_c0;c104902.graph_c0;c105118.graph_c0;c105587.graph_c1;c106341.graph_c0;c108997.graph_c0;c112334.graph_c0;c126092.graph_c0;c134531.graph_c0;c138352.graph_c0;c139991.graph_c0;c140127.graph_c0;c142026.graph_c0;c142254.graph_c0;c145937.graph_c0;c147455.graph_c0;c152379.graph_c0;c154136.graph_c0;c161159.graph_c0;c16321.graph_c0;c173302.graph_c0;c186997.g…	K03649+K03649+K10803+K02327+K10747+K10771+K10776+K10773+K10802+K10772+K03660+K10772+K10773+K02327+K02327+K02328+K02325+K03648+K10773+K10772+K10771+K10802+K03648+K10776+K03648+K10747+K04802+K02327+K02324+K02324+K04802+K03652+K02327+K03649+K02324+K10563+K03652+K02328+K03649+K04799+K03652+K02328+K04802+K03506+K10798+K03660
ECM-receptor interaction	ko04512	46	c103419.graph_c1;c103696.graph_c1;c103879.graph_c0;c104358.graph_c3;c105650.graph_c0;c106757.graph_c4;c107054.graph_c0;c107418.graph_c0;c107418.graph_c4;c107702.graph_c0;c107733.graph_c0;c107749.graph_c0;c107828.graph_c0;c108176.graph_c2;c108241.graph_c0;c108452.graph_c0;c108452.graph_c1;c108537.graph_c1;c108537.graph_c2;c108561.graph_c0;c118730.graph_c0;c133288.graph_c0;c138453.graph_c0;c151623.…	K04659+K05719+K05637+K06237+K05719+K06258+K06254+K06237+K06237+K05719+K06258+K06254+K06265+K06258+K05637+K05636+K05636+K05635+K05635+K06240+K06258+K03900+K03900+K05719+K06258+K03900+K03900+K06252+K06258+K06258+K03900+K05636+K03900+K06252+K03900+K06236+K03900+K06254+K06265+K03900+K06258+K06254+K06236+K06236+K06236+K03900
Pantothenate and CoA biosynthesis	ko00770	45	c100006.graph_c0;c100092.graph_c0;c100448.graph_c0;c102803.graph_c0;c102803.graph_c1;c102911.graph_c0;c104194.graph_c0;c105621.graph_c0;c105947.graph_c0;c106004.graph_c0;c106606.graph_c0;c107215.graph_c0;c107337.graph_c0;c114083.graph_c0;c117845.graph_c0;c120456.graph_c0;c127870.graph_c0;c128416.graph_c0;c129380.graph_c0;c141238.graph_c0;c141250.graph_c0;c144538.graph_c0;c145635.graph_c0;c147374.…	K00826+K09680+K01598+K01431+K01431+K00826+K06133+K01687+K00207+K02318+K01464+K09680+K01598+K00826+K01687+K01687+K00826+K01431+K00207+K09680+K09680+K01431+K01513+K09680+K09680+K09680+K01687+K09680+K09680+K09680+K09680+K09680+K00207+K01687+K01687+K01922+K00826+K00826+K01922+K00207+K00207+K00207+K00207+K01598+K01431
Neuroactive ligand-receptor interaction	ko04080	45	c100633.graph_c0;c101736.graph_c0;c102165.graph_c1;c102165.graph_c2;c102187.graph_c0;c102227.graph_c0;c102484.graph_c0;c102758.graph_c0;c103419.graph_c0;c103729.graph_c0;c103729.graph_c1;c103729.graph_c2;c103729.graph_c3;c103840.graph_c3;c103877.graph_c0;c103957.graph_c2;c104281.graph_c0;c105729.graph_c0;c105729.graph_c1;c106031.graph_c0;c106439.graph_c0;c106769.graph_c0;c106822.graph_c1;c107065.…	K04608+K04148+K04153+K04153+K05208+K04578+K04280+K04266+K04280+K05213+K05213+K05213+K05213+K04266+K05202+K05175+K04239+K04134+K04134+K05195+K04615+K04615+K04615+K04577+K04615+K04225+K04585+K04603+K05181+K05181+K04306+K05770+K05195+K05051+K04153+K05189+K05770+K04131+K04153+K04233+K04131+K05175+K05175+K05210+K04163
Other glycan degradation	ko00511	44	c101267.graph_c0;c102909.graph_c0;c103590.graph_c0;c103766.graph_c0;c105046.graph_c0;c105598.graph_c0;c105726.graph_c0;c106239.graph_c0;c107576.graph_c0;c108256.graph_c0;c108313.graph_c0;c108689.graph_c0;c114516.graph_c0;c123183.graph_c0;c133832.graph_c0;c146162.graph_c0;c147595.graph_c0;c150528.graph_c0;c152834.graph_c0;c156275.graph_c0;c156974.graph_c0;c157418.graph_c0;c158690.graph_c0;c159218.…	K17108+K12373+K17108+K12373+K12373+K12373+K01191+K12311+K12309+K14459+K01227+K01191+K12309+K12311+K12309+K12373+K12311+K12311+K01192+K12373+K12311+K12373+K01192+K01191+K01191+K12309+K01444+K17108+K14459+K12311+K12311+K01192+K12311+K12311+K12309+K12309+K12373+K12373+K12309+K12373+K12311+K01444+K14459+K14459
Arachidonic acid metabolism	ko00590	43	c102325.graph_c0;c105032.graph_c0;c105949.graph_c0;c105949.graph_c1;c108289.graph_c0;c109546.graph_c0;c113374.graph_c0;c115339.graph_c0;c116784.graph_c0;c121572.graph_c0;c124428.graph_c0;c130631.graph_c0;c132057.graph_c0;c135977.graph_c0;c139776.graph_c0;c145513.graph_c0;c146232.graph_c0;c151820.graph_c0;c154175.graph_c0;c161930.graph_c0;c167738.graph_c0;c171775.graph_c0;c178208.graph_c0;c178988.…	K05309+K01047+K18592+K18592+K16343+K00432+K01254+K01254+K07422+K08726+K18592+K01832+K16342+K00432+K01254+K00432+K08726+K08726+K00081+K17687+K00432+K00079+K00432+K01254+K08726+K01047+K08726+K00432+K18592+K18592+K08726+K15730+K08726+K15730+K16342+K08726+K01254+K00432+K01254+K01047+K01830+K00432+K01254
Adrenergic signaling in cardiomyocytes	ko04261	42	c102883.graph_c0;c103061.graph_c1;c106587.graph_c0;c108903.graph_c0;c111220.graph_c0;c116488.graph_c0;c120544.graph_c0;c122451.graph_c0;c125708.graph_c0;c132404.graph_c0;c135271.graph_c0;c135599.graph_c0;c137569.graph_c0;c146606.graph_c0;c147770.graph_c0;c15429.graph_c0;c162170.graph_c0;c164101.graph_c0;c17176.graph_c0;c17457.graph_c0;c174977.graph_c0;c17609.graph_c0;c181064.graph_c0;c183761.grap…	K06269+K02183+K04634+K17751+K04382+K04456+K04371+K06269+K03456+K02183+K11584+K04441+K04345+K05850+K04456+K04354+K01539+K01540+K04345+K04634+K11584+K05850+K06269+K01540+K05850+K04441+K05865+K04441+K12314+K03456+K04456+K06269+K02183+K04851+K12314+K02183+K02183+K04354+K06269+K02183+K02183+K02183
PPAR signaling pathway	ko03320	40	c107044.graph_c0;c109255.graph_c0;c117379.graph_c0;c119767.graph_c0;c131098.graph_c0;c131227.graph_c0;c131255.graph_c0;c133635.graph_c0;c136188.graph_c0;c145190.graph_c0;c145801.graph_c0;c157333.graph_c0;c160120.graph_c0;c169438.graph_c0;c171016.graph_c0;c173235.graph_c0;c178980.graph_c0;c181005.graph_c0;c184393.graph_c0;c187403.graph_c0;c25239.graph_c0;c31037.graph_c0;c41462.graph_c0;c42196.grap…	K08770+K07513+K07513+K00232+K07513+K07513+K00255+K01897+K00249+K08766+K01897+K15013+K00232+K15013+K01897+K00232+K15013+K00488+K00507+K08757+K01897+K00864+K06276+K07431+K00232+K08766+K08770+K08746+K08745+K01897+K00507+K08764+K07431+K00507+K00232+K01897+K08762+K08770+K07513+K00232
Calcium signaling pathway	ko04020	39	c100191.graph_c0;c103061.graph_c1;c106587.graph_c0;c114515.graph_c0;c118974.graph_c0;c127397.graph_c0;c128634.graph_c0;c132404.graph_c0;c133260.graph_c0;c137013.graph_c0;c137569.graph_c0;c142161.graph_c0;c146606.graph_c0;c159583.graph_c0;c168384.graph_c0;c17176.graph_c0;c17457.graph_c0;c17609.graph_c0;c18819.graph_c0;c189224.graph_c0;c23877.graph_c0;c45386.graph_c0;c547.graph_c0;c59936.graph_c0;c…	K05869+K02183+K04634+K05857+K04348+K05863+K05857+K02183+K05853+K04718+K04345+K09565+K05850+K05860+K05853+K04345+K04634+K05850+K05850+K05865+K04348+K05863+K02183+K04851+K09565+K04348+K15040+K05850+K02183+K02183+K04718+K15040+K09565+K02183+K15040+K02183+K02183+K04348+K04345
SNARE interactions in vesicular transport	ko04130	39	c101684.graph_c0;c102103.graph_c0;c102781.graph_c0;c103294.graph_c2;c105173.graph_c0;c105701.graph_c1;c106951.graph_c1;c111898.graph_c0;c112841.graph_c0;c114776.graph_c0;c119538.graph_c0;c121745.graph_c0;c123117.graph_c0;c124445.graph_c0;c125916.graph_c0;c126269.graph_c0;c128570.graph_c0;c128809.graph_c0;c133232.graph_c0;c147410.graph_c0;c159407.graph_c0;c162057.graph_c0;c162640.graph_c0;c163604.…	K08509+K08488+K08496+K04560+K04560+K08490+K08495+K08517+K08516+K08513+K08488+K08490+K08489+K08488+K08517+K08495+K13504+K08490+K08490+K08517+K08515+K08504+K08504+K08495+K08497+K08493+K08495+K08488+K13504+K08517+K08516+K08515+K08492+K08516+K08493+K08515+K08486+K08515+K08504
alpha-Linolenic acid metabolism	ko00592	38	c105032.graph_c0;c10555.graph_c0;c106451.graph_c0;c108253.graph_c0;c108289.graph_c0;c109255.graph_c0;c117329.graph_c0;c117379.graph_c0;c119767.graph_c0;c125384.graph_c0;c131098.graph_c0;c131227.graph_c0;c132057.graph_c0;c136586.graph_c0;c137576.graph_c0;c145251.graph_c0;c147227.graph_c0;c158564.graph_c0;c160120.graph_c0;c164648.graph_c0;c165042.graph_c0;c172165.graph_c0;c173235.graph_c0;c173982.g…	K01047+K10226+K00232+K00232+K16343+K07513+K00232+K07513+K00232+K00232+K07513+K07513+K16342+K00232+K00232+K00232+K07513+K00232+K00232+K00232+K07513+K07513+K00232+K07513+K00232+K01047+K07513+K00232+K00232+K00232+K00232+K16342+K00232+K07513+K00232+K07513+K01047+K00232
Epstein-Barr virus infection	ko05169	38	c109101.graph_c0;c116488.graph_c0;c119360.graph_c0;c119828.graph_c0;c120193.graph_c0;c121171.graph_c0;c122224.graph_c0;c124468.graph_c0;c126075.graph_c0;c136828.graph_c0;c143439.graph_c0;c147250.graph_c0;c157202.graph_c0;c159138.graph_c0;c161702.graph_c0;c170379.graph_c0;c17176.graph_c0;c188240.graph_c0;c19017.graph_c0;c190773.graph_c0;c33686.graph_c0;c34426.graph_c0;c40811.graph_c0;c47029.graph_…	K03283+K04456+K03009+K03038+K03283+K03021+K03283+K03283+K03022+K03020+K03283+K11838+K03038+K04730+K03038+K03283+K04345+K04441+K03065+K04730+K03010+K03120+K03039+K03032+K03029+K03115+K06067+K03083+K03028+K03020+K03283+K03018+K03065+K03021+K03027+K03061+K03283+K14290
Progesterone-mediated oocyte maturation	ko04914	37	c102354.graph_c0;c104046.graph_c0;c104046.graph_c1;c115503.graph_c0;c116488.graph_c0;c118060.graph_c0;c120076.graph_c0;c120544.graph_c0;c126681.graph_c0;c126708.graph_c0;c135221.graph_c0;c135599.graph_c0;c137569.graph_c0;c140693.graph_c0;c141823.graph_c0;c142671.graph_c0;c143512.graph_c0;c144347.graph_c0;c147770.graph_c0;c151334.graph_c0;c155866.graph_c0;c17176.graph_c0;c180674.graph_c0;c184661.g…	K06627+K04079+K04079+K03364+K04456+K04079+K04079+K04371+K06627+K04079+K04373+K04441+K04345+K02537+K05868+K05868+K04079+K04367+K04456+K05868+K06627+K04345+K03350+K06631+K04441+K04441+K04079+K04367+K05868+K02206+K04456+K05868+K05868+K05868+K13728+K04079+K02206
Regulation of actin cytoskeleton	ko04810	36	c102883.graph_c0;c110864.graph_c0;c113348.graph_c0;c120544.graph_c0;c122451.graph_c0;c141976.graph_c0;c143028.graph_c0;c144347.graph_c0;c14475.graph_c0;c153469.graph_c0;c153560.graph_c0;c165092.graph_c0;c179203.graph_c0;c181064.graph_c0;c182800.graph_c0;c187240.graph_c0;c188323.graph_c0;c190303.graph_c0;c24481.graph_c0;c30343.graph_c0;c46715.graph_c0;c47275.graph_c0;c50648.graph_c0;c53378.graph_c…	K06269+K05754+K05692+K04371+K06269+K07860+K05692+K04367+K07830+K05768+K04410+K05756+K00889+K06269+K04362+K05764+K05757+K05759+K00889+K04367+K05765+K05692+K05733+K06269+K05733+K05692+K05692+K13708+K04393+K05692+K06269+K04410+K05756+K05692+K05692+K05692
Herpes simplex infection	ko05168	36	c101871.graph_c0;c102883.graph_c0;c114408.graph_c0;c115453.graph_c0;c117363.graph_c0;c122451.graph_c0;c139324.graph_c0;c139426.graph_c0;c147250.graph_c0;c151927.graph_c0;c160135.graph_c0;c160924.graph_c0;c164696.graph_c0;c169068.graph_c0;c171282.graph_c0;c176354.graph_c0;c177294.graph_c0;c181064.graph_c0;c185847.graph_c0;c185921.graph_c0;c187197.graph_c0;c24449.graph_c0;c24879.graph_c0;c34426.gra…	K02207+K06269+K16196+K03006+K11838+K06269+K15409+K14840+K11838+K12881+K08738+K03131+K12890+K12893+K15410+K03130+K03990+K06269+K03097+K14966+K14840+K03006+K16196+K03120+K02206+K06269+K03097+K15410+K11838+K03115+K03130+K03094+K03094+K06269+K03006+K02206
Glycosylphosphatidylinositol(GPI)-anchor biosynthesis	ko00563	34	c101414.graph_c0;c101823.graph_c1;c102813.graph_c0;c104982.graph_c0;c106427.graph_c0;c106452.graph_c0;c108227.graph_c2;c110300.graph_c0;c110934.graph_c0;c112047.graph_c0;c119937.graph_c0;c12669.graph_c0;c127809.graph_c0;c141020.graph_c0;c152179.graph_c0;c161714.graph_c0;c176937.graph_c0;c178176.graph_c0;c183936.graph_c0;c188031.graph_c0;c188544.graph_c0;c190728.graph_c0;c36204.graph_c0;c67529.gra…	K03857+K03434+K05291+K05285+K05310+K05288+K05289+K03857+K05284+K05289+K05288+K05288+K05293+K05286+K05293+K05285+K03434+K05285+K05285+K07542+K05284+K03861+K03434+K05290+K03858+K05288+K05289+K05294+K09658+K05293+K03861+K05286+K05290+K05284
Sulfur metabolism	ko00920	34	c102380.graph_c0;c102735.graph_c0;c104801.graph_c0;c107092.graph_c0;c107553.graph_c0;c107553.graph_c1;c123701.graph_c0;c124631.graph_c0;c125839.graph_c0;c142419.graph_c0;c142516.graph_c0;c144360.graph_c0;c144402.graph_c0;c146018.graph_c0;c148347.graph_c0;c148853.graph_c0;c15452.graph_c0;c15475.graph_c0;c155373.graph_c0;c159644.graph_c0;c160135.graph_c0;c173752.graph_c0;c180787.graph_c0;c33520.gra…	K08738+K00387+K17218+K13811+K17725+K17725+K01738+K01738+K01011+K01738+K01082+K13811+K00387+K01011+K13811+K00387+K00387+K01738+K17218+K13811+K08738+K17218+K01738+K13811+K08738+K08738+K01011+K08738+K01011+K01738+K01738+K08738+K01738+K13811
Glycosaminoglycan degradation	ko00531	32	c100308.graph_c0;c101832.graph_c1;c102909.graph_c0;c103766.graph_c0;c104045.graph_c0;c104045.graph_c1;c104333.graph_c0;c105046.graph_c0;c105300.graph_c0;c105566.graph_c0;c105598.graph_c0;c106674.graph_c0;c107005.graph_c0;c107576.graph_c0;c10848.graph_c0;c114516.graph_c0;c124118.graph_c0;c133832.graph_c0;c146162.graph_c0;c156275.graph_c0;c157193.graph_c0;c157418.graph_c0;c161949.graph_c0;c185272.g…	K01195+K07964+K12373+K12373+K10532+K10532+K01195+K12373+K01205+K01197+K12373+K01565+K01137+K12309+K10532+K12309+K01565+K12309+K12373+K12373+K01565+K12373+K12309+K01565+K10532+K12309+K12309+K12373+K12373+K12309+K12373+K10532
Focal adhesion	ko04510	32	c102883.graph_c0;c113348.graph_c0;c116488.graph_c0;c116631.graph_c0;c120544.graph_c0;c122451.graph_c0;c141976.graph_c0;c143028.graph_c0;c147770.graph_c0;c153560.graph_c0;c157786.graph_c0;c180761.graph_c0;c181064.graph_c0;c41462.graph_c0;c4569.graph_c1;c47275.graph_c0;c50648.graph_c0;c53378.graph_c1;c54160.graph_c0;c55942.graph_c0;c57470.graph_c0;c63339.graph_c0;c66063.graph_c0;c70813.graph_c0;c81…	K06269+K05692+K04456+K03083+K04371+K06269+K07860+K05692+K04456+K04410+K06252+K06252+K06269+K06276+K04456+K05692+K05733+K06269+K05733+K05692+K05692+K13708+K04393+K03083+K05692+K03083+K06269+K04410+K05692+K05692+K03083+K05692
Huntington's disease	ko05016	32	c100302.graph_c0;c100340.graph_c0;c106587.graph_c0;c111348.graph_c0;c114527.graph_c0;c119360.graph_c0;c130440.graph_c0;c137611.graph_c0;c158063.graph_c0;c160135.graph_c0;c169435.graph_c0;c174179.graph_c0;c17457.graph_c0;c33686.graph_c0;c34426.graph_c0;c4961.graph_c0;c59511.graph_c0;c66832.graph_c0;c71876.graph_c0;c75729.graph_c0;c76432.graph_c0;c81230.graph_c0;c81822.graph_c0;c83885.graph_c0;c848…	K03953+K04564+K04634+K02136+K04564+K03009+K04646+K03943+K04646+K08738+K11824+K00413+K04634+K03010+K03120+K11353+K00412+K06067+K02265+K04565+K02265+K02266+K02265+K03940+K04564+K11824+K02264+K02136+K00415+K02128+K04646+K02133
Tight junction	ko04530	31	c108903.graph_c0;c110153.graph_c0;c111220.graph_c0;c113348.graph_c0;c116488.graph_c0;c123942.graph_c0;c125708.graph_c0;c143028.graph_c0;c14475.graph_c0;c146683.graph_c0;c147770.graph_c0;c15429.graph_c0;c181025.graph_c0;c182016.graph_c0;c183917.graph_c0;c184914.graph_c0;c185847.graph_c0;c45531.graph_c0;c4569.graph_c1;c47275.graph_c0;c47358.graph_c0;c54235.graph_c0;c55942.graph_c0;c57470.graph_c0;c…	K17751+K06087+K04382+K05692+K04456+K18052+K03456+K05692+K07830+K04424+K04456+K04354+K10352+K10352+K06068+K06103+K03097+K03456+K04456+K05692+K06087+K03097+K05692+K05692+K03115+K04393+K05692+K04354+K05692+K05692+K05692
Degradation of aromatic compounds	ko01220	30	c106436.graph_c1;c113851.graph_c0;c125486.graph_c0;c127114.graph_c0;c130528.graph_c0;c137302.graph_c0;c138801.graph_c0;c140654.graph_c0;c140822.graph_c0;c149342.graph_c0;c158027.graph_c0;c175518.graph_c0;c178804.graph_c0;c178969.graph_c0;c179270.graph_c0;c186314.graph_c0;c21407.graph_c0;c21799.graph_c0;c23578.graph_c0;c2659.graph_c0;c37583.graph_c0;c46362.graph_c0;c48024.graph_c0;c69848.graph_c0;…	K00121+K00002+K00121+K00002+K00121+K00002+K00121+K00121+K00121+K00121+K13953+K00002+K00121+K13953+K13953+K00002+K00121+K01053+K00121+K00121+K13953+K00121+K00121+K01053+K01053+K13953+K00002+K00121+K00121+K13953
Cardiac muscle contraction	ko04260	30	c108903.graph_c0;c137806.graph_c0;c143620.graph_c0;c146971.graph_c0;c147631.graph_c0;c152028.graph_c0;c162170.graph_c0;c162293.graph_c0;c164101.graph_c0;c164412.graph_c0;c168274.graph_c0;c174179.graph_c0;c180050.graph_c0;c183761.graph_c0;c188433.graph_c0;c189224.graph_c0;c20876.graph_c0;c48812.graph_c0;c49912.graph_c0;c53852.graph_c0;c59511.graph_c0;c59936.graph_c0;c61034.graph_c0;c71876.graph_c0…	K17751+K02261+K02262+K02261+K02256+K02256+K01539+K02272+K01540+K02267+K00413+K00413+K02263+K01540+K02256+K05865+K12314+K00418+K02268+K00415+K00412+K04851+K12314+K02265+K02265+K02266+K02265+K02264+K00415+K02264
Gap junction	ko04540	30	c106587.graph_c0;c109396.graph_c0;c111558.graph_c0;c114310.graph_c0;c115209.graph_c0;c115925.graph_c0;c120544.graph_c0;c132325.graph_c0;c137569.graph_c0;c146536.graph_c0;c152518.graph_c0;c156320.graph_c0;c161839.graph_c0;c17176.graph_c0;c17457.graph_c0;c175361.graph_c0;c185681.graph_c0;c37033.graph_c0;c37961.graph_c0;c41671.graph_c0;c58191.graph_c0;c63231.graph_c0;c75570.graph_c0;c76757.graph_c0;…	K04634+K07375+K07374+K07374+K07374+K07375+K04371+K07374+K04345+K07374+K08959+K04464+K07375+K04345+K04634+K04464+K07374+K07374+K07374+K04420+K07374+K07374+K07374+K07375+K07374+K07374+K08959+K07374+K07374+K07374
Influenza A	ko05164	30	c103633.graph_c0;c109101.graph_c0;c116488.graph_c0;c116631.graph_c0;c120193.graph_c0;c122224.graph_c0;c124468.graph_c0;c126299.graph_c0;c143028.graph_c0;c143439.graph_c0;c144320.graph_c0;c159511.graph_c0;c160135.graph_c0;c162703.graph_c0;c163413.graph_c0;c169215.graph_c0;c170379.graph_c0;c173061.graph_c0;c188240.graph_c0;c189808.graph_c0;c189965.graph_c0;c37904.graph_c0;c47275.graph_c0;c57470.gra…	K12812+K03283+K04456+K03083+K03283+K03283+K03283+K04733+K05692+K03283+K04733+K00787+K08738+K04733+K12812+K04733+K03283+K04733+K04441+K04441+K04733+K12812+K05692+K05692+K03083+K03283+K03283+K03083+K03283+K14290
Caffeine metabolism	ko00232	29	c105236.graph_c0;c108314.graph_c0;c111318.graph_c0;c112413.graph_c0;c116983.graph_c0;c117875.graph_c0;c145397.graph_c0;c151211.graph_c0;c155163.graph_c0;c157381.graph_c0;c159756.graph_c0;c164267.graph_c0;c167557.graph_c0;c188271.graph_c0;c188551.graph_c0;c189096.graph_c0;c35890.graph_c0;c5331.graph_c0;c5331.graph_c1;c60313.graph_c0;c61589.graph_c0;c61589.graph_c1;c76767.graph_c0;c82487.graph_c0;c…	K00106+K00106+K00365+K00106+K00106+K00365+K00365+K00365+K00106+K00106+K00106+K00106+K00106+K00106+K00106+K00106+K00106+K00106+K00106+K00365+K00106+K00106+K00106+K00106+K00106+K00106+K00106+K00365+K00106
Phototransduction - fly	ko04745	29	c103240.graph_c0;c103664.graph_c1;c105488.graph_c1;c105683.graph_c0;c106965.graph_c0;c107063.graph_c0;c107438.graph_c0;c107438.graph_c1;c108082.graph_c0;c108107.graph_c0;c108114.graph_c1;c108607.graph_c0;c108607.graph_c1;c108875.graph_c0;c169735.graph_c0;c22563.graph_c0;c23809.graph_c0;c45027.graph_c0;c45027.graph_c1;c56734.graph_c0;c87378.graph_c0;c90426.graph_c0;c90473.graph_c0;c97017.graph_c1;…	K05328+K13806+K13806+K13806+K05858+K08834+K05328+K05328+K13803+K04958+K05858+K08834+K08834+K05692+K13806+K05692+K04634+K05692+K05692+K05328+K05328+K02183+K05692+K05692+K05692+K00910+K07972+K02677+K13805
Phenylalanine, tyrosine and tryptophan biosynthesis	ko00400	28	c100568.graph_c0;c125003.graph_c0;c138039.graph_c0;c155277.graph_c0;c156287.graph_c0;c157365.graph_c0;c176918.graph_c0;c180221.graph_c0;c180371.graph_c0;c46932.graph_c0;c50225.graph_c0;c56297.graph_c1;c57335.graph_c0;c60322.graph_c0;c70872.graph_c0;c77187.graph_c0;c82035.graph_c0;c85831.graph_c0;c86135.graph_c0;c89306.graph_c0;c89595.graph_c0;c92326.graph_c0;c92511.graph_c0;c93587.graph_c2;c94046…	K00500+K14455+K00815+K14454+K14455+K03334+K00815+K14454+K14454+K00815+K14455+K01695+K14455+K14455+K00815+K03334+K14455+K14455+K00815+K14455+K14455+K14454+K14455+K14455+K14455+K14455+K00500+K14454
GnRH signaling pathway	ko04912	28	c103061.graph_c1;c106587.graph_c0;c110605.graph_c0;c111594.graph_c0;c120544.graph_c0;c132057.graph_c0;c132404.graph_c0;c135599.graph_c0;c137569.graph_c0;c141845.graph_c0;c156320.graph_c0;c17176.graph_c0;c17457.graph_c0;c175361.graph_c0;c188240.graph_c0;c189808.graph_c0;c41671.graph_c0;c48342.graph_c0;c547.graph_c0;c59936.graph_c0;c66063.graph_c0;c73478.graph_c0;c77323.graph_c1;c81623.graph_c0;c82…	K02183+K04634+K01115+K04428+K04371+K16342+K02183+K04441+K04345+K04416+K04464+K04345+K04634+K04464+K04441+K04441+K04420+K01115+K02183+K04851+K04393+K16342+K04421+K02183+K02183+K02183+K02183+K02183
Alzheimer's disease	ko05010	28	c100302.graph_c0;c103061.graph_c1;c106587.graph_c0;c111348.graph_c0;c132404.graph_c0;c137611.graph_c0;c160135.graph_c0;c174179.graph_c0;c17457.graph_c0;c23877.graph_c0;c4961.graph_c0;c547.graph_c0;c59511.graph_c0;c70813.graph_c0;c71876.graph_c0;c76432.graph_c0;c81230.graph_c0;c81623.graph_c0;c81822.graph_c0;c82630.graph_c0;c83885.graph_c0;c87902.graph_c0;c88063.graph_c0;c89970.graph_c0;c90207.gra…	K03953+K02183+K04634+K02136+K02183+K03943+K08738+K00413+K04634+K04348+K11353+K02183+K00412+K03083+K02265+K02265+K02266+K02183+K02265+K02183+K03940+K02264+K02136+K02183+K00415+K02128+K02183+K02133
Ether lipid metabolism	ko00565	27	c101303.graph_c0;c103548.graph_c3;c105032.graph_c0;c105678.graph_c0;c106779.graph_c2;c107542.graph_c1;c107542.graph_c2;c107597.graph_c0;c108289.graph_c0;c110605.graph_c0;c116866.graph_c0;c119435.graph_c0;c132057.graph_c0;c133671.graph_c0;c139973.graph_c0;c157751.graph_c0;c173303.graph_c0;c178392.graph_c0;c190949.graph_c0;c39828.graph_c0;c46266.graph_c0;c48342.graph_c0;c73478.graph_c0;c78310.graph…	K00993+K00993+K01047+K16794+K13510+K01115+K01115+K16860+K16343+K01115+K16794+K16794+K16342+K16794+K16794+K01115+K16860+K01115+K01047+K01115+K01115+K01115+K16342+K01115+K01047+K13644+K00803
MAPK signaling pathway - fly	ko04013	27	c100064.graph_c0;c103254.graph_c0;c103254.graph_c3;c105487.graph_c0;c106598.graph_c0;c106626.graph_c0;c108209.graph_c0;c108359.graph_c0;c108359.graph_c1;c108471.graph_c2;c108758.graph_c1;c116168.graph_c0;c119404.graph_c0;c140927.graph_c0;c150022.graph_c0;c152418.graph_c0;c160230.graph_c0;c165171.graph_c0;c166038.graph_c0;c168056.graph_c0;c169783.graph_c0;c189723.graph_c0;c89927.graph_c0;c90580.gr…	K04623+K03211+K03211+K03099+K07293+K05088+K04371+K04361+K04361+K02644+K04364+K04371+K12377+K03099+K07293+K04368+K12377+K12380+K02678+K03099+K07293+K04364+K04623+K12379+K02678+K04368+K07827
Circadian rhythm - fly	ko04711	27	c103147.graph_c0;c103147.graph_c1;c105505.graph_c3;c106515.graph_c0;c108030.graph_c0;c108030.graph_c1;c108030.graph_c2;c110155.graph_c0;c112063.graph_c0;c113679.graph_c0;c114482.graph_c0;c114610.graph_c0;c119374.graph_c0;c134499.graph_c0;c155500.graph_c0;c161158.graph_c0;c16562.graph_c0;c37127.graph_c0;c41484.graph_c0;c45459.graph_c0;c64381.graph_c0;c66723.graph_c0;c81593.graph_c0;c86070.graph_c0…	K12114+K12114+K02296+K02223+K02633+K02633+K02633+K02633+K02633+K02633+K12074+K12074+K12074+K03083+K03083+K03083+K12074+K03083+K12074+K12074+K09057+K12114+K09057+K03083+K08960+K12114+K03083
Synthesis and degradation of ketone bodies	ko00072	24	c102334.graph_c1;c102790.graph_c0;c104520.graph_c0;c105264.graph_c0;c110523.graph_c0;c110654.graph_c0;c114213.graph_c0;c114808.graph_c0;c120071.graph_c0;c120815.graph_c0;c127417.graph_c0;c152345.graph_c0;c155178.graph_c0;c160242.graph_c0;c170147.graph_c0;c21623.graph_c0;c22184.graph_c0;c37325.graph_c0;c84978.graph_c0;c87716.graph_c0;c90986.graph_c0;c96296.graph_c0;c97051.graph_c0;c99811.graph_c0;	K01641+K00626+K00626+K00626+K01641+K01641+K01641+K01640+K01641+K00019+K01640+K01027+K01027+K00626+K01641+K00626+K01027+K01641+K01027+K00626+K00626+K01641+K00626+K00626
Taurine and hypotaurine metabolism	ko00430	24	c100800.graph_c1;c103128.graph_c0;c103190.graph_c0;c105329.graph_c0;c105949.graph_c0;c105949.graph_c1;c105989.graph_c5;c105989.graph_c7;c116853.graph_c0;c124428.graph_c0;c128256.graph_c0;c148621.graph_c0;c149966.graph_c0;c174062.graph_c0;c175536.graph_c0;c182469.graph_c0;c187276.graph_c0;c36446.graph_c0;c43618.graph_c0;c4607.graph_c0;c85925.graph_c0;c86843.graph_c0;c88286.graph_c0;c99958.graph_c0;	K01580+K15371+K00456+K10712+K18592+K18592+K01580+K01580+K00681+K18592+K01594+K00681+K01580+K01580+K01580+K00456+K00681+K00681+K18592+K18592+K01580+K00456+K01580+K15371
Cyanoamino acid metabolism	ko00460	24	c101093.graph_c0;c102496.graph_c0;c105949.graph_c0;c105949.graph_c1;c115271.graph_c0;c116853.graph_c0;c124428.graph_c0;c141303.graph_c0;c148621.graph_c0;c154207.graph_c0;c163088.graph_c0;c169626.graph_c0;c173260.graph_c0;c174182.graph_c0;c184966.graph_c0;c187276.graph_c0;c36446.graph_c0;c43618.graph_c0;c4607.graph_c0;c49120.graph_c0;c77022.graph_c1;c86380.graph_c0;c87535.graph_c0;c94037.graph_c0;	K00600+K00600+K18592+K18592+K01501+K00681+K18592+K00600+K00681+K00600+K01501+K05349+K00600+K00600+K00600+K00681+K00681+K18592+K18592+K00600+K01501+K00600+K00600+K00600
Insect hormone biosynthesis	ko00981	24	c102627.graph_c0;c103951.graph_c0;c103951.graph_c1;c104924.graph_c0;c105224.graph_c0;c105224.graph_c1;c106015.graph_c0;c106149.graph_c0;c106595.graph_c0;c116322.graph_c0;c116613.graph_c0;c117895.graph_c0;c129879.graph_c0;c139560.graph_c0;c141623.graph_c0;c23770.graph_c0;c4558.graph_c0;c75082.graph_c0;c79783.graph_c0;c79783.graph_c1;c82350.graph_c0;c86837.graph_c0;c90241.graph_c0;c94608.graph_c0;	K10722+K10718+K10718+K10719+K10721+K10721+K10723+K10720+K14985+K10718+K10719+K14985+K10719+K10724+K10718+K14939+K10718+K14939+K14939+K14939+K10719+K10719+K14939+K14937
Vascular smooth muscle contraction	ko04270	24	c102883.graph_c0;c103061.graph_c1;c106587.graph_c0;c120544.graph_c0;c122451.graph_c0;c123942.graph_c0;c132057.graph_c0;c132404.graph_c0;c137569.graph_c0;c161930.graph_c0;c17176.graph_c0;c17457.graph_c0;c181064.graph_c0;c183917.graph_c0;c53378.graph_c1;c547.graph_c0;c59936.graph_c0;c73478.graph_c0;c81623.graph_c0;c82630.graph_c0;c85351.graph_c0;c89970.graph_c0;c95991.graph_c0;c96077.graph_c0;	K06269+K02183+K04634+K04371+K06269+K18052+K16342+K02183+K04345+K17687+K04345+K04634+K06269+K06068+K06269+K02183+K04851+K16342+K02183+K02183+K06269+K02183+K02183+K02183
Salmonella infection	ko05132	23	c110864.graph_c0;c113348.graph_c0;c120544.graph_c0;c135599.graph_c0;c137944.graph_c0;c143028.graph_c0;c157427.graph_c0;c165092.graph_c0;c188240.graph_c0;c188323.graph_c0;c189808.graph_c0;c190303.graph_c0;c47275.graph_c0;c55730.graph_c0;c55942.graph_c0;c57470.graph_c0;c66063.graph_c0;c81110.graph_c0;c81967.graph_c0;c87349.graph_c0;c92141.graph_c0;c93165.graph_c0;c97017.graph_c0;	K05754+K05692+K04371+K04441+K10413+K05692+K10407+K05756+K04441+K05757+K04441+K05759+K05692+K07863+K05692+K05692+K04393+K07897+K05692+K05756+K05692+K05692+K05692
Ubiquinone and other terpenoid-quinone biosynthesis	ko00130	22	c100677.graph_c2;c104223.graph_c0;c105050.graph_c0;c126488.graph_c0;c131701.graph_c0;c138039.graph_c0;c151037.graph_c0;c162414.graph_c0;c171565.graph_c0;c176918.graph_c0;c33132.graph_c0;c46932.graph_c0;c53626.graph_c1;c69719.graph_c0;c69917.graph_c0;c70872.graph_c0;c77299.graph_c0;c80466.graph_c0;c86135.graph_c0;c86685.graph_c0;c92548.graph_c1;c94480.graph_c0;	K00457+K10106+K06125+K06134+K06125+K00815+K00457+K00591+K06126+K00815+K00457+K00815+K06134+K00591+K10106+K00815+K06125+K06125+K00815+K06126+K06127+K06127
Valine, leucine and isoleucine biosynthesis	ko00290	22	c100006.graph_c0;c102911.graph_c0;c105621.graph_c0;c114083.graph_c0;c117287.graph_c0;c117845.graph_c0;c120456.graph_c0;c127870.graph_c0;c133194.graph_c0;c133489.graph_c0;c149135.graph_c0;c152194.graph_c0;c162542.graph_c0;c165814.graph_c0;c51534.graph_c0;c51534.graph_c1;c56818.graph_c0;c59474.graph_c0;c65150.graph_c0;c78720.graph_c0;c86248.graph_c0;c98573.graph_c0;	K00826+K00826+K01687+K00826+K01702+K01687+K01687+K00826+K01702+K01702+K01702+K01702+K01687+K01702+K01687+K01687+K00826+K00826+K01702+K17989+K17989+K01649
p53 signaling pathway	ko04115	22	c100710.graph_c0;c115790.graph_c0;c116336.graph_c0;c139133.graph_c0;c140538.graph_c0;c141823.graph_c0;c142671.graph_c0;c145281.graph_c0;c151334.graph_c0;c160135.graph_c0;c190258.graph_c0;c2451.graph_c0;c33699.graph_c0;c35654.graph_c0;c36701.graph_c0;c3995.graph_c0;c48009.graph_c0;c48822.graph_c0;c58232.graph_c1;c82250.graph_c0;c84272.graph_c0;c98926.graph_c0;	K10808+K10808+K10144+K10144+K10145+K05868+K05868+K10144+K05868+K08738+K02084+K06640+K10808+K05868+K02206+K10808+K05868+K05868+K05868+K02216+K02216+K02206
Sulfur relay system	ko04122	22	c100890.graph_c0;c102141.graph_c1;c106955.graph_c0;c125839.graph_c0;c129916.graph_c0;c132840.graph_c0;c13373.graph_c0;c142048.graph_c0;c146018.graph_c0;c160097.graph_c0;c166453.graph_c0;c176801.graph_c0;c183313.graph_c0;c52168.graph_c0;c52444.graph_c0;c54158.graph_c0;c65184.graph_c0;c72794.graph_c0;c76446.graph_c0;c8064.graph_c0;c83526.graph_c0;c99552.graph_c0;	K03635+K11996+K12161+K01011+K03639+K03639+K03639+K04487+K01011+K14168+K04487+K11996+K14168+K01011+K14168+K03635+K11996+K04487+K01011+K11996+K11996+K04487
Apoptosis	ko04210	22	c113528.graph_c0;c116488.graph_c0;c118974.graph_c0;c126299.graph_c0;c137569.graph_c0;c144320.graph_c0;c147770.graph_c0;c159138.graph_c0;c160135.graph_c0;c162703.graph_c0;c168780.graph_c0;c169215.graph_c0;c17176.graph_c0;c173061.graph_c0;c183840.graph_c0;c189965.graph_c0;c190258.graph_c0;c190773.graph_c0;c23877.graph_c0;c4569.graph_c1;c69084.graph_c0;c75559.graph_c0;	K04466+K04456+K04348+K04733+K04345+K04733+K04456+K04730+K08738+K04733+K02861+K04733+K04345+K04733+K04730+K04733+K02084+K04730+K04348+K04456+K04733+K04348
Parkinson's disease	ko05012	22	c100302.graph_c0;c111348.graph_c0;c137417.graph_c0;c137611.graph_c0;c155364.graph_c0;c160135.graph_c0;c17176.graph_c0;c174179.graph_c0;c40697.graph_c0;c4961.graph_c0;c59511.graph_c0;c71876.graph_c0;c76432.graph_c0;c81230.graph_c0;c81822.graph_c0;c83885.graph_c0;c87902.graph_c0;c88063.graph_c0;c89228.graph_c0;c90207.graph_c0;c90907.graph_c0;c99159.graph_c0;	K03953+K02136+K03178+K03943+K03178+K08738+K04345+K00413+K03178+K11353+K00412+K02265+K02265+K02266+K02265+K03940+K02264+K02136+K04555+K00415+K02128+K02133
Estrogen signaling pathway	ko04915	21	c103061.graph_c1;c104046.graph_c0;c104046.graph_c1;c106587.graph_c0;c109101.graph_c0;c116488.graph_c0;c120193.graph_c0;c122224.graph_c0;c124468.graph_c0;c132404.graph_c0;c143439.graph_c0;c170379.graph_c0;c17176.graph_c0;c17457.graph_c0;c547.graph_c0;c81623.graph_c0;c82630.graph_c0;c83714.graph_c0;c89970.graph_c0;c95991.graph_c0;c9642.graph_c0;	K02183+K04079+K04079+K04634+K03283+K04456+K03283+K03283+K03283+K02183+K03283+K03283+K04345+K04634+K02183+K02183+K02183+K03283+K02183+K02183+K03283
Tuberculosis	ko05152	21	c103061.graph_c1;c116488.graph_c0;c126299.graph_c0;c132404.graph_c0;c140374.graph_c0;c144320.graph_c0;c159138.graph_c0;c160135.graph_c0;c162703.graph_c0;c173061.graph_c0;c188240.graph_c0;c189965.graph_c0;c190773.graph_c0;c23877.graph_c0;c40503.graph_c0;c547.graph_c0;c81623.graph_c0;c82630.graph_c0;c84638.graph_c0;c89970.graph_c0;c95991.graph_c0;	K02183+K04456+K04733+K02183+K02146+K04733+K04730+K08738+K04733+K04733+K04441+K04733+K04730+K04348+K02146+K02183+K02183+K02183+K04718+K02183+K02183
Folate biosynthesis	ko00790	20	c100890.graph_c0;c102684.graph_c0;c103077.graph_c1;c107713.graph_c0;c111011.graph_c0;c116661.graph_c0;c128981.graph_c0;c129916.graph_c0;c132840.graph_c0;c133327.graph_c0;c13373.graph_c0;c145564.graph_c0;c161350.graph_c0;c173771.graph_c0;c37091.graph_c0;c54158.graph_c0;c71440.graph_c0;c82063.graph_c0;c84505.graph_c0;c96826.graph_c0;	K03635+K01495+K01737+K01077+K01077+K01495+K01495+K03639+K03639+K00072+K03639+K01930+K01930+K01930+K01077+K03635+K01307+K00357+K01930+K00310
ErbB signaling pathway	ko04012	20	c116488.graph_c0;c116631.graph_c0;c120544.graph_c0;c129304.graph_c0;c147770.graph_c0;c151197.graph_c0;c153560.graph_c0;c16986.graph_c0;c181011.graph_c0;c37114.graph_c0;c37114.graph_c1;c4569.graph_c1;c50648.graph_c0;c54160.graph_c0;c70813.graph_c0;c77147.graph_c0;c83739.graph_c0;c83969.graph_c0;c85990.graph_c0;c94700.graph_c0;	K04456+K03083+K04371+K07827+K04456+K04371+K04410+K07203+K04368+K04688+K04688+K04456+K05733+K05733+K03083+K03083+K03083+K04371+K04410+K03083
Adipocytokine signaling pathway	ko04920	20	c100179.graph_c0;c116488.graph_c0;c117002.graph_c0;c123942.graph_c0;c133635.graph_c0;c14041.graph_c0;c145801.graph_c0;c147770.graph_c0;c157333.graph_c0;c169438.graph_c0;c16986.graph_c0;c171016.graph_c0;c178980.graph_c0;c179059.graph_c0;c25239.graph_c0;c4569.graph_c1;c58099.graph_c0;c77984.graph_c0;c80358.graph_c0;c87668.graph_c0;	K07200+K04456+K07199+K18052+K01897+K07359+K01897+K04456+K15013+K15013+K07203+K01897+K15013+K07191+K01897+K04456+K01897+K07191+K07198+K01897
Glycosphingolipid biosynthesis - ganglio series	ko00604	19	c102909.graph_c0;c103766.graph_c0;c105046.graph_c0;c105598.graph_c0;c107576.graph_c0;c114516.graph_c0;c115323.graph_c0;c133832.graph_c0;c146162.graph_c0;c156275.graph_c0;c157418.graph_c0;c161949.graph_c0;c40378.graph_c0;c40378.graph_c1;c47022.graph_c0;c47022.graph_c1;c54845.graph_c0;c56351.graph_c0;c98716.graph_c0;	K12373+K12373+K12373+K12373+K12309+K12309+K03372+K12309+K12373+K12373+K12373+K12309+K12309+K12309+K12373+K12373+K12309+K12373+K03372
Toll-like receptor signaling pathway	ko04620	19	c116488.graph_c0;c120544.graph_c0;c126299.graph_c0;c135599.graph_c0;c144320.graph_c0;c147770.graph_c0;c159138.graph_c0;c162703.graph_c0;c168780.graph_c0;c169215.graph_c0;c173061.graph_c0;c183840.graph_c0;c188240.graph_c0;c189644.graph_c0;c189808.graph_c0;c189965.graph_c0;c190773.graph_c0;c4569.graph_c1;c69084.graph_c0;	K04456+K04371+K04733+K04441+K04733+K04456+K04730+K04733+K02861+K04733+K04733+K04730+K04441+K09446+K04441+K04733+K04730+K04456+K04733
Measles	ko05162	19	c109101.graph_c0;c116488.graph_c0;c120193.graph_c0;c122224.graph_c0;c124468.graph_c0;c126299.graph_c0;c143439.graph_c0;c144320.graph_c0;c159138.graph_c0;c162703.graph_c0;c170379.graph_c0;c173061.graph_c0;c189965.graph_c0;c190773.graph_c0;c59394.graph_c0;c70813.graph_c0;c83714.graph_c0;c93969.graph_c1;c9642.graph_c0;	K03283+K04456+K03283+K03283+K03283+K04733+K03283+K04733+K04730+K04733+K03283+K04733+K04733+K04730+K03115+K03083+K03283+K14753+K03283
Neurotrophin signaling pathway	ko04722	18	c103061.graph_c1;c116488.graph_c0;c126299.graph_c0;c132404.graph_c0;c144320.graph_c0;c156320.graph_c0;c159138.graph_c0;c162703.graph_c0;c173061.graph_c0;c188240.graph_c0;c189965.graph_c0;c190773.graph_c0;c547.graph_c0;c70813.graph_c0;c81623.graph_c0;c82630.graph_c0;c89970.graph_c0;c95991.graph_c0;	K02183+K04456+K04733+K02183+K04733+K04464+K04730+K04733+K04733+K04441+K04733+K04730+K02183+K03083+K02183+K02183+K02183+K02183
Dopaminergic synapse	ko04728	18	c103061.graph_c1;c106587.graph_c0;c111220.graph_c0;c116488.graph_c0;c132404.graph_c0;c17176.graph_c0;c17457.graph_c0;c174977.graph_c0;c188240.graph_c0;c23877.graph_c0;c547.graph_c0;c70813.graph_c0;c81623.graph_c0;c82630.graph_c0;c84524.graph_c1;c89970.graph_c0;c95991.graph_c0;c97345.graph_c0;	K02183+K04634+K04382+K04456+K02183+K04345+K04634+K11584+K04441+K04348+K02183+K03083+K02183+K02183+K04354+K02183+K02183+K00545
Toxoplasmosis	ko05145	18	c109101.graph_c0;c116488.graph_c0;c120193.graph_c0;c122224.graph_c0;c124468.graph_c0;c126299.graph_c0;c143439.graph_c0;c144320.graph_c0;c159138.graph_c0;c160135.graph_c0;c162703.graph_c0;c170379.graph_c0;c173061.graph_c0;c188240.graph_c0;c189965.graph_c0;c190773.graph_c0;c83714.graph_c0;c9642.graph_c0;	K03283+K04456+K03283+K03283+K03283+K04733+K03283+K04733+K04730+K08738+K04733+K03283+K04733+K04441+K04733+K04730+K03283+K03283
Rap1 signaling pathway	ko04015	17	c103061.graph_c1;c106587.graph_c0;c116488.graph_c0;c132404.graph_c0;c141976.graph_c0;c143028.graph_c0;c159583.graph_c0;c17457.graph_c0;c182800.graph_c0;c188240.graph_c0;c47275.graph_c0;c547.graph_c0;c57470.graph_c0;c81623.graph_c0;c82630.graph_c0;c89970.graph_c0;c95991.graph_c0;	K02183+K04634+K04456+K02183+K07860+K05692+K05860+K04634+K04362+K04441+K05692+K02183+K05692+K02183+K02183+K02183+K02183
cAMP signaling pathway	ko04024	17	c103061.graph_c1;c116488.graph_c0;c132404.graph_c0;c141976.graph_c0;c14475.graph_c0;c159583.graph_c0;c160120.graph_c0;c164101.graph_c0;c17176.graph_c0;c173235.graph_c0;c18819.graph_c0;c547.graph_c0;c81623.graph_c0;c82630.graph_c0;c89970.graph_c0;c95991.graph_c0;c96405.graph_c0;	K02183+K04456+K02183+K07860+K07830+K05860+K00232+K01540+K04345+K00232+K05850+K02183+K02183+K02183+K02183+K02183+K00232
PI3K-Akt signaling pathway	ko04151	17	c104046.graph_c0;c104046.graph_c1;c111220.graph_c0;c116488.graph_c0;c118580.graph_c0;c157786.graph_c0;c173175.graph_c0;c174977.graph_c0;c182800.graph_c0;c188961.graph_c0;c3346.graph_c0;c34126.graph_c0;c70813.graph_c0;c84524.graph_c1;c90420.graph_c0;c95872.graph_c1;c98581.graph_c0;	K04079+K04079+K04382+K04456+K16339+K06252+K08266+K11584+K04362+K00693+K13303+K16339+K03083+K04354+K02991+K02991+K00693
Adherens junction	ko04520	17	c113348.graph_c0;c120544.graph_c0;c141976.graph_c0;c143028.graph_c0;c148851.graph_c0;c182800.graph_c0;c185847.graph_c0;c47275.graph_c0;c54235.graph_c0;c55942.graph_c0;c57470.graph_c0;c59394.graph_c0;c66063.graph_c0;c81967.graph_c0;c92141.graph_c0;c93165.graph_c0;c97017.graph_c0;	K05692+K04371+K07860+K05692+K04468+K04362+K03097+K05692+K03097+K05692+K05692+K03115+K04393+K05692+K05692+K05692+K05692
NOD-like receptor signaling pathway	ko04621	17	c104046.graph_c0;c104046.graph_c1;c118060.graph_c0;c120076.graph_c0;c120544.graph_c0;c126708.graph_c0;c135599.graph_c0;c141697.graph_c0;c143512.graph_c0;c154768.graph_c0;c188240.graph_c0;c189808.graph_c0;c27787.graph_c0;c43025.graph_c0;c56325.graph_c0;c63983.graph_c0;c9983.graph_c0;	K04079+K04079+K04079+K04079+K04371+K04079+K04441+K09487+K04079+K09487+K04441+K04441+K04079+K12796+K09487+K04079+K09487
Melanogenesis	ko04916	17	c103061.graph_c1;c106587.graph_c0;c116631.graph_c0;c120544.graph_c0;c132404.graph_c0;c137569.graph_c0;c17176.graph_c0;c17457.graph_c0;c547.graph_c0;c70813.graph_c0;c81623.graph_c0;c82630.graph_c0;c83739.graph_c0;c89970.graph_c0;c94700.graph_c0;c95991.graph_c0;c96077.graph_c0;	K02183+K04634+K03083+K04371+K02183+K04345+K04345+K04634+K02183+K03083+K02183+K02183+K03083+K02183+K03083+K02183+K02183
Glycosaminoglycan biosynthesis - heparan sulfate / heparin	ko00534	16	c100305.graph_c0;c101082.graph_c0;c101162.graph_c0;c104019.graph_c1;c104761.graph_c0;c105112.graph_c2;c105659.graph_c0;c108257.graph_c0;c109310.graph_c0;c137594.graph_c0;c163892.graph_c0;c169470.graph_c0;c188292.graph_c0;c90499.graph_c0;c92541.graph_c0;c95457.graph_c0;	K02370+K02370+K00734+K02366+K02577+K07809+K01793+K00771+K08104+K02367+K02577+K00771+K00733+K08104+K00733+K02367
Glycosphingolipid biosynthesis - globo series	ko00603	16	c102909.graph_c0;c103766.graph_c0;c105046.graph_c0;c105598.graph_c0;c105781.graph_c1;c126703.graph_c0;c137255.graph_c0;c146162.graph_c0;c156275.graph_c0;c156946.graph_c0;c157418.graph_c0;c33892.graph_c0;c47022.graph_c0;c47022.graph_c1;c56351.graph_c0;c97460.graph_c1;	K12373+K12373+K12373+K12373+K01988+K01204+K01204+K12373+K12373+K07407+K12373+K07407+K12373+K12373+K12373+K01204
Ras signaling pathway	ko04014	16	c103061.graph_c1;c116488.graph_c0;c132404.graph_c0;c141976.graph_c0;c14475.graph_c0;c151975.graph_c0;c159583.graph_c0;c17176.graph_c0;c182800.graph_c0;c547.graph_c0;c81623.graph_c0;c82630.graph_c0;c85990.graph_c0;c89970.graph_c0;c95991.graph_c0;c97045.graph_c0;	K02183+K04456+K02183+K07860+K07830+K17632+K05860+K04345+K04362+K02183+K02183+K02183+K04410+K02183+K02183+K17630
VEGF signaling pathway	ko04370	16	c116488.graph_c0;c118974.graph_c0;c120544.graph_c0;c132057.graph_c0;c135599.graph_c0;c137013.graph_c0;c141976.graph_c0;c147770.graph_c0;c188240.graph_c0;c189808.graph_c0;c23877.graph_c0;c4569.graph_c1;c66063.graph_c0;c73478.graph_c0;c75559.graph_c0;c84638.graph_c0;	K04456+K04348+K04371+K16342+K04441+K04718+K07860+K04456+K04441+K04441+K04348+K04456+K04393+K16342+K04348+K04718
Cytosolic DNA-sensing pathway	ko04623	16	c115365.graph_c0;c119360.graph_c0;c121171.graph_c0;c126075.graph_c0;c136828.graph_c0;c168325.graph_c0;c168780.graph_c0;c186825.graph_c0;c33899.graph_c0;c42359.graph_c0;c70894.graph_c0;c79792.graph_c0;c82278.graph_c0;c86227.graph_c0;c89566.graph_c0;c89877.graph_c1;	K03007+K03009+K03021+K03022+K03020+K03018+K02861+K03027+K03007+K03018+K03021+K03020+K03014+K03018+K03021+K03027
Non-alcoholic fatty liver disease (NAFLD)	ko04932	16	c100302.graph_c0;c116488.graph_c0;c137611.graph_c0;c160135.graph_c0;c174179.graph_c0;c4961.graph_c0;c59511.graph_c0;c70813.graph_c0;c71876.graph_c0;c76432.graph_c0;c81230.graph_c0;c81822.graph_c0;c83885.graph_c0;c87902.graph_c0;c90207.graph_c0;c96383.graph_c0;	K03953+K04456+K03943+K08738+K00413+K11353+K00412+K03083+K02265+K02265+K02266+K02265+K03940+K02264+K00415+K05632
Bile secretion	ko04976	16	c111172.graph_c0;c118883.graph_c0;c138251.graph_c0;c138834.graph_c0;c142888.graph_c0;c154843.graph_c0;c164101.graph_c0;c170362.graph_c0;c17176.graph_c0;c176154.graph_c0;c56195.graph_c0;c73321.graph_c0;c81939.graph_c0;c86808.graph_c0;c96981.graph_c0;c97450.graph_c0;	K09864+K05666+K09864+K09864+K05666+K09864+K01540+K05666+K04345+K05667+K09864+K09864+K05666+K05681+K09864+K05681
Steroid hormone biosynthesis	ko00140	15	c11025.graph_c0;c110773.graph_c0;c120869.graph_c0;c153617.graph_c0;c171868.graph_c0;c175808.graph_c0;c186784.graph_c0;c188466.graph_c0;c2758.graph_c0;c31125.graph_c0;c55147.graph_c0;c87301.graph_c0;c89848.graph_c0;c97345.graph_c0;c99738.graph_c0;	K07408+K07408+K10251+K00513+K00512+K10251+K17691+K00512+K07408+K12343+K07424+K07424+K10251+K00545+K00251
Vitamin B6 metabolism	ko00750	15	c10111.graph_c0;c122148.graph_c0;c131290.graph_c0;c145883.graph_c0;c159741.graph_c0;c166235.graph_c0;c178638.graph_c0;c32986.graph_c0;c35807.graph_c0;c78918.graph_c1;c91154.graph_c0;c91603.graph_c0;c93967.graph_c0;c97463.graph_c0;c98469.graph_c0;	K08681+K06215+K00831+K00868+K00831+K00831+K00831+K06215+K08681+K00831+K07758+K06215+K00831+K06215+K00868
Non-homologous end-joining	ko03450	15	c107918.graph_c0;c108181.graph_c1;c108618.graph_c0;c108618.graph_c1;c146266.graph_c0;c149674.graph_c0;c153080.graph_c0;c158296.graph_c0;c165216.graph_c0;c166202.graph_c0;c188774.graph_c0;c190002.graph_c0;c86500.graph_c0;c95324.graph_c0;c97145.graph_c0;	K10865+K10884+K06642+K06642+K10865+K10866+K10866+K10866+K10777+K10866+K10865+K10865+K04799+K10887+K10866
Oxytocin signaling pathway	ko04921	15	c103061.graph_c1;c106587.graph_c0;c132404.graph_c0;c143028.graph_c0;c156320.graph_c0;c17176.graph_c0;c17457.graph_c0;c23877.graph_c0;c47275.graph_c0;c547.graph_c0;c57470.graph_c0;c81623.graph_c0;c82630.graph_c0;c89970.graph_c0;c95991.graph_c0;	K02183+K04634+K02183+K05692+K04464+K04345+K04634+K04348+K05692+K02183+K05692+K02183+K02183+K02183+K02183
Pertussis	ko05133	15	c103061.graph_c1;c126299.graph_c0;c132404.graph_c0;c144320.graph_c0;c159138.graph_c0;c162703.graph_c0;c173061.graph_c0;c188240.graph_c0;c189965.graph_c0;c190773.graph_c0;c547.graph_c0;c81623.graph_c0;c82630.graph_c0;c89970.graph_c0;c95991.graph_c0;	K02183+K04733+K02183+K04733+K04730+K04733+K04733+K04441+K04733+K04730+K02183+K02183+K02183+K02183+K02183
Legionellosis	ko05134	15	c109101.graph_c0;c111114.graph_c0;c120193.graph_c0;c122224.graph_c0;c124468.graph_c0;c143439.graph_c0;c160135.graph_c0;c170379.graph_c0;c34445.graph_c0;c41190.graph_c0;c7919.graph_c0;c83714.graph_c0;c86812.graph_c0;c9642.graph_c0;c97581.graph_c0;	K03283+K03231+K03283+K03283+K03283+K03283+K08738+K03283+K03233+K08517+K03231+K03283+K03231+K03283+K13525
Lysine biosynthesis	ko00300	14	c100565.graph_c0;c107224.graph_c1;c109702.graph_c0;c175071.graph_c0;c176980.graph_c0;c180277.graph_c0;c182813.graph_c0;c184566.graph_c0;c24263.graph_c0;c56533.graph_c0;c70268.graph_c0;c85745.graph_c0;c97688.graph_c0;c97861.graph_c0;	K00825+K14085+K00290+K00003+K00003+K00825+K00290+K00825+K01586+K00133+K00825+K00825+K00290+K14085
Alcoholism	ko05034	14	c103061.graph_c1;c132404.graph_c0;c173609.graph_c0;c45852.graph_c0;c547.graph_c0;c5783.graph_c0;c66832.graph_c0;c75722.graph_c0;c80514.graph_c1;c81623.graph_c0;c82630.graph_c0;c85853.graph_c0;c89970.graph_c0;c95991.graph_c0;	K02183+K02183+K11251+K11251+K02183+K11407+K06067+K11253+K11254+K02183+K02183+K11252+K02183+K02183
cGMP-PKG signaling pathway	ko04022	13	c103061.graph_c1;c106587.graph_c0;c116488.graph_c0;c132404.graph_c0;c164101.graph_c0;c17457.graph_c0;c18819.graph_c0;c23877.graph_c0;c547.graph_c0;c81623.graph_c0;c82630.graph_c0;c89970.graph_c0;c95991.graph_c0;	K02183+K04634+K04456+K02183+K01540+K04634+K05850+K04348+K02183+K02183+K02183+K02183+K02183
Sphingolipid signaling pathway	ko04071	13	c106587.graph_c0;c111220.graph_c0;c116488.graph_c0;c141976.graph_c0;c142080.graph_c0;c17457.graph_c0;c174977.graph_c0;c176629.graph_c0;c178484.graph_c0;c188240.graph_c0;c77745.graph_c0;c84524.graph_c1;c84638.graph_c0;	K04634+K04382+K04456+K07860+K00654+K04634+K11584+K01634+K04710+K04441+K12351+K04354+K04718
AMPK signaling pathway	ko04152	13	c111220.graph_c0;c116488.graph_c0;c132597.graph_c0;c144395.graph_c0;c150237.graph_c0;c174977.graph_c0;c188961.graph_c0;c75567.graph_c0;c79023.graph_c0;c84524.graph_c1;c86309.graph_c0;c94852.graph_c0;c98581.graph_c0;	K04382+K04456+K07877+K08272+K03841+K11584+K00693+K00507+K11262+K04354+K00850+K01103+K00693
Chagas disease (American trypanosomiasis)	ko05142	13	c106587.graph_c0;c111220.graph_c0;c116488.graph_c0;c126299.graph_c0;c144320.graph_c0;c159138.graph_c0;c162703.graph_c0;c173061.graph_c0;c17457.graph_c0;c188240.graph_c0;c189965.graph_c0;c190773.graph_c0;c84524.graph_c1;	K04634+K04382+K04456+K04733+K04733+K04730+K04733+K04733+K04634+K04441+K04733+K04730+K04354
Pathways in cancer	ko05200	13	c104046.graph_c0;c104046.graph_c1;c106587.graph_c0;c116488.graph_c0;c141976.graph_c0;c160135.graph_c0;c17176.graph_c0;c17457.graph_c0;c182800.graph_c0;c66832.graph_c0;c70813.graph_c0;c71512.graph_c0;c7334.graph_c0;	K04079+K04079+K04634+K04456+K07860+K08738+K04345+K04634+K04362+K06067+K03083+K01679+K01679
Viral carcinogenesis	ko05203	13	c140374.graph_c0;c147250.graph_c0;c17176.graph_c0;c3265.graph_c0;c34426.graph_c0;c40503.graph_c0;c41028.graph_c0;c5783.graph_c0;c62938.graph_c0;c66832.graph_c0;c77322.graph_c0;c80514.graph_c1;c85853.graph_c0;	K02146+K11838+K04345+K00873+K03120+K02146+K00873+K11407+K00873+K06067+K11594+K11254+K11252
Primary bile acid biosynthesis	ko00120	12	c116169.graph_c0;c138847.graph_c0;c173465.graph_c0;c178137.graph_c0;c181005.graph_c0;c34487.graph_c0;c42196.graph_c1;c44487.graph_c0;c60521.graph_c0;c61873.graph_c0;c67467.graph_c0;c99738.graph_c0;	K12405+K12408+K12405+K12405+K00488+K01796+K07431+K12405+K08764+K11992+K07431+K00251
Riboflavin metabolism	ko00740	12	c103120.graph_c1;c108707.graph_c0;c137405.graph_c0;c144185.graph_c0;c145635.graph_c0;c159949.graph_c0;c43805.graph_c0;c45004.graph_c1;c53420.graph_c0;c72523.graph_c0;c8202.graph_c0;c86396.graph_c0;	K14410+K00861+K00861+K14379+K01513+K14394+K00861+K00953+K14410+K14394+K14410+K00953
Antigen processing and presentation	ko04612	12	c104046.graph_c0;c104046.graph_c1;c109101.graph_c0;c120193.graph_c0;c122224.graph_c0;c124468.graph_c0;c143439.graph_c0;c170379.graph_c0;c75138.graph_c0;c78388.graph_c0;c83714.graph_c0;c9642.graph_c0;	K04079+K04079+K03283+K03283+K03283+K03283+K03283+K03283+K01363+K08054+K03283+K03283
Salivary secretion	ko04970	12	c103061.graph_c1;c106587.graph_c0;c132404.graph_c0;c164101.graph_c0;c17176.graph_c0;c17457.graph_c0;c18819.graph_c0;c547.graph_c0;c81623.graph_c0;c82630.graph_c0;c89970.graph_c0;c95991.graph_c0;	K02183+K04634+K02183+K01540+K04345+K04634+K05850+K02183+K02183+K02183+K02183+K02183
Glycosaminoglycan biosynthesis - chondroitin sulfate / dermatan sulfate	ko00532	11	c100388.graph_c0;c101162.graph_c0;c101574.graph_c0;c104259.graph_c0;c108257.graph_c0;c159572.graph_c0;c169470.graph_c0;c188292.graph_c0;c19942.graph_c0;c92541.graph_c0;c97705.graph_c0;	K01017+K00734+K13499+K00746+K00771+K00747+K00771+K00733+K00747+K00733+K03419
Long-term potentiation	ko04720	11	c103061.graph_c1;c106587.graph_c0;c132404.graph_c0;c17176.graph_c0;c17457.graph_c0;c23877.graph_c0;c547.graph_c0;c81623.graph_c0;c82630.graph_c0;c89970.graph_c0;c95991.graph_c0;	K02183+K04634+K02183+K04345+K04634+K04348+K02183+K02183+K02183+K02183+K02183
Inflammatory mediator regulation of TRP channels	ko04750	11	c103061.graph_c1;c106587.graph_c0;c132404.graph_c0;c17176.graph_c0;c17457.graph_c0;c188240.graph_c0;c547.graph_c0;c81623.graph_c0;c82630.graph_c0;c89970.graph_c0;c95991.graph_c0;	K02183+K04634+K02183+K04345+K04634+K04441+K02183+K02183+K02183+K02183+K02183
Gastric acid secretion	ko04971	11	c103061.graph_c1;c106587.graph_c0;c132404.graph_c0;c164101.graph_c0;c17176.graph_c0;c17457.graph_c0;c547.graph_c0;c81623.graph_c0;c82630.graph_c0;c89970.graph_c0;c95991.graph_c0;	K02183+K04634+K02183+K01540+K04345+K04634+K02183+K02183+K02183+K02183+K02183
HTLV-I infection	ko05166	11	c116488.graph_c0;c120411.graph_c0;c14475.graph_c0;c159511.graph_c0;c17176.graph_c0;c23877.graph_c0;c34426.graph_c0;c52913.graph_c1;c70813.graph_c0;c78388.graph_c0;c98198.graph_c0;	K04456+K08874+K07830+K00787+K04345+K04348+K03120+K08874+K03083+K08054+K14290
Proteoglycans in cancer	ko05205	11	c116488.graph_c0;c143028.graph_c0;c14475.graph_c0;c159583.graph_c0;c17176.graph_c0;c182800.graph_c0;c188240.graph_c0;c47275.graph_c0;c57470.graph_c0;c90420.graph_c0;c95872.graph_c1;	K04456+K05692+K07830+K05860+K04345+K04362+K04441+K05692+K05692+K02991+K02991
Central carbon metabolism in cancer	ko05230	11	c116488.graph_c0;c152294.graph_c0;c153758.graph_c0;c165860.graph_c0;c182800.graph_c0;c3265.graph_c0;c41028.graph_c0;c62938.graph_c0;c76204.graph_c0;c86309.graph_c0;c90693.graph_c0;	K04456+K00844+K00162+K00036+K04362+K00873+K00873+K00873+K00161+K00850+K00036
Lipoic acid metabolism	ko00785	10	c102219.graph_c0;c107824.graph_c0;c121695.graph_c0;c138882.graph_c0;c153677.graph_c0;c163188.graph_c0;c167627.graph_c0;c170021.graph_c0;c73514.graph_c0;c99101.graph_c0;	K03644+K10105+K03644+K03644+K10105+K03644+K10105+K10105+K03644+K03801
Hippo signaling pathway	ko04390	10	c111220.graph_c0;c125578.graph_c0;c143028.graph_c0;c152518.graph_c0;c44424.graph_c0;c47275.graph_c0;c57470.graph_c0;c70813.graph_c0;c84524.graph_c1;c88682.graph_c0;	K04382+K08960+K05692+K08959+K08960+K05692+K05692+K03083+K04354+K08960
Circadian entrainment	ko04713	10	c103061.graph_c1;c106587.graph_c0;c132404.graph_c0;c17176.graph_c0;c17457.graph_c0;c547.graph_c0;c81623.graph_c0;c82630.graph_c0;c89970.graph_c0;c95991.graph_c0;	K02183+K04634+K02183+K04345+K04634+K02183+K02183+K02183+K02183+K02183
Phototransduction	ko04744	10	c103061.graph_c1;c132404.graph_c0;c142294.graph_c0;c172850.graph_c0;c547.graph_c0;c81623.graph_c0;c82630.graph_c0;c89970.graph_c0;c95991.graph_c0;c96077.graph_c0;	K02183+K02183+K04631+K04536+K02183+K02183+K02183+K02183+K02183+K02183
Proximal tubule bicarbonate reclamation	ko04964	10	c100496.graph_c0;c111172.graph_c0;c132250.graph_c0;c138251.graph_c0;c138834.graph_c0;c154843.graph_c0;c164101.graph_c0;c56195.graph_c0;c73321.graph_c0;c96981.graph_c0;	K00025+K09864+K00025+K09864+K09864+K09864+K01540+K09864+K09864+K09864
Mucin type O-Glycan biosynthesis	ko00512	9	c104417.graph_c0;c105007.graph_c2;c105964.graph_c0;c106545.graph_c0;c107763.graph_c0;c107859.graph_c4;c108521.graph_c1;c109099.graph_c0;c86277.graph_c0;	K00710+K00710+K00710+K00710+K00710+K00710+K00710+K00710+K00710
HIF-1 signaling pathway	ko04066	9	c116488.graph_c0;c152294.graph_c0;c153758.graph_c0;c175734.graph_c0;c5780.graph_c0;c76204.graph_c0;c90420.graph_c0;c94852.graph_c0;c95872.graph_c1;	K04456+K00844+K00162+K08008+K08008+K00161+K02991+K01103+K02991
Thyroid hormone signaling pathway	ko04919	9	c116488.graph_c0;c143028.graph_c0;c159583.graph_c0;c164101.graph_c0;c17176.graph_c0;c47275.graph_c0;c57470.graph_c0;c66832.graph_c0;c70813.graph_c0;	K04456+K05692+K05860+K01540+K04345+K05692+K05692+K06067+K03083
Endocrine and other factor-regulated calcium reabsorption	ko04961	9	c106587.graph_c0;c130440.graph_c0;c158063.graph_c0;c164101.graph_c0;c169435.graph_c0;c17176.graph_c0;c17457.graph_c0;c85464.graph_c0;c97814.graph_c0;	K04634+K04646+K04646+K01540+K11824+K04345+K04634+K11824+K04646
Amphetamine addiction	ko05031	9	c103061.graph_c1;c132404.graph_c0;c17176.graph_c0;c23877.graph_c0;c547.graph_c0;c81623.graph_c0;c82630.graph_c0;c89970.graph_c0;c95991.graph_c0;	K02183+K02183+K04345+K04348+K02183+K02183+K02183+K02183+K02183
Bacterial invasion of epithelial cells	ko05100	9	c130440.graph_c0;c143028.graph_c0;c158063.graph_c0;c165092.graph_c0;c47275.graph_c0;c57470.graph_c0;c90945.graph_c2;c97814.graph_c0;c98410.graph_c0;	K04646+K05692+K04646+K05756+K05692+K05692+K13737+K04646+K16938
Chemical carcinogenesis	ko05204	9	c11025.graph_c0;c121411.graph_c0;c148538.graph_c0;c149342.graph_c0;c171775.graph_c0;c186784.graph_c0;c55147.graph_c0;c87301.graph_c0;c92409.graph_c0;	K07408+K13952+K00129+K00121+K00079+K17691+K07424+K07424+K00129
NF-kappa B signaling pathway	ko04064	8	c126299.graph_c0;c144320.graph_c0;c159138.graph_c0;c162703.graph_c0;c173061.graph_c0;c189965.graph_c0;c190773.graph_c0;c59394.graph_c0;	K04733+K04733+K04730+K04733+K04733+K04733+K04730+K03115
Platelet activation	ko04611	8	c106587.graph_c0;c116488.graph_c0;c143028.graph_c0;c17176.graph_c0;c17457.graph_c0;c188240.graph_c0;c47275.graph_c0;c57470.graph_c0;	K04634+K04456+K05692+K04345+K04634+K04441+K05692+K05692
Synaptic vesicle cycle	ko04721	8	c113419.graph_c0;c130440.graph_c0;c140374.graph_c0;c158063.graph_c0;c169435.graph_c0;c40503.graph_c0;c85464.graph_c0;c97814.graph_c0;	K02152+K04646+K02146+K04646+K11824+K02146+K11824+K04646
Retrograde endocannabinoid signaling	ko04723	8	c100301.graph_c0;c106587.graph_c0;c17176.graph_c0;c17457.graph_c0;c188240.graph_c0;c43373.graph_c0;c49200.graph_c0;c89784.graph_c0;	K15528+K04634+K04345+K04634+K04441+K13985+K15528+K15528
Olfactory transduction	ko04740	8	c103061.graph_c1;c132404.graph_c0;c17176.graph_c0;c547.graph_c0;c81623.graph_c0;c82630.graph_c0;c89970.graph_c0;c95991.graph_c0;	K02183+K02183+K04345+K02183+K02183+K02183+K02183+K02183
Leishmaniasis	ko05140	8	c126299.graph_c0;c144320.graph_c0;c159138.graph_c0;c162703.graph_c0;c173061.graph_c0;c188240.graph_c0;c189965.graph_c0;c190773.graph_c0;	K04733+K04733+K04730+K04733+K04733+K04441+K04733+K04730
Glioma	ko05214	8	c103061.graph_c1;c116488.graph_c0;c132404.graph_c0;c547.graph_c0;c81623.graph_c0;c82630.graph_c0;c89970.graph_c0;c95991.graph_c0;	K02183+K04456+K02183+K02183+K02183+K02183+K02183+K02183
D-Glutamine and D-glutamate metabolism	ko00471	7	c107299.graph_c0;c128951.graph_c0;c133049.graph_c0;c136956.graph_c0;c169816.graph_c0;c82468.graph_c0;c97353.graph_c0;	K01425+K00261+K01425+K00261+K01425+K00261+K00261
Linoleic acid metabolism	ko00591	7	c111792.graph_c0;c127386.graph_c0;c132057.graph_c0;c190949.graph_c0;c55147.graph_c0;c73478.graph_c0;c87301.graph_c0;	K07424+K07424+K16342+K01047+K07424+K16342+K07424
Leukocyte transendothelial migration	ko04670	7	c141976.graph_c0;c143028.graph_c0;c175734.graph_c0;c188240.graph_c0;c47275.graph_c0;c57470.graph_c0;c5780.graph_c0;	K07860+K05692+K08008+K04441+K05692+K05692+K08008
Systemic lupus erythematosus	ko05322	7	c173609.graph_c0;c45852.graph_c0;c58076.graph_c0;c71036.graph_c0;c75722.graph_c0;c80514.graph_c1;c85853.graph_c0;	K11251+K11251+K11088+K11090+K11253+K11254+K11252
Viral myocarditis	ko05416	7	c131661.graph_c0;c141976.graph_c0;c143028.graph_c0;c160135.graph_c0;c47275.graph_c0;c57470.graph_c0;c96710.graph_c0;	K03260+K07860+K05692+K08738+K05692+K05692+K03260
Thiamine metabolism	ko00730	6	c100913.graph_c0;c142048.graph_c0;c166453.graph_c0;c72794.graph_c0;c98714.graph_c0;c99552.graph_c0;	K00949+K04487+K04487+K04487+K00949+K04487
Biotin metabolism	ko00780	6	c102342.graph_c0;c153953.graph_c0;c179969.graph_c0;c42015.graph_c0;c73946.graph_c0;c79961.graph_c0;	K01942+K01942+K09458+K09458+K01942+K01942
RIG-I-like receptor signaling pathway	ko04622	6	c135599.graph_c0;c141845.graph_c0;c168780.graph_c0;c188240.graph_c0;c189808.graph_c0;c77322.graph_c0;	K04441+K04416+K02861+K04441+K04441+K11594
GABAergic synapse	ko04727	6	c149966.graph_c0;c17176.graph_c0;c174062.graph_c0;c175536.graph_c0;c79766.graph_c0;c88286.graph_c0;	K01580+K04345+K01580+K01580+K13524+K01580
Thyroid hormone synthesis	ko04918	6	c106587.graph_c0;c135840.graph_c0;c164101.graph_c0;c17176.graph_c0;c17457.graph_c0;c78388.graph_c0;	K04634+K09582+K01540+K04345+K04634+K08054
Osteoclast differentiation	ko04380	5	c116488.graph_c0;c175734.graph_c0;c188240.graph_c0;c23877.graph_c0;c5780.graph_c0;	K04456+K08008+K04441+K04348+K08008
T cell receptor signaling pathway	ko04660	5	c116488.graph_c0;c188240.graph_c0;c23877.graph_c0;c70813.graph_c0;c85990.graph_c0;	K04456+K04441+K04348+K03083+K04410
Carbohydrate digestion and absorption	ko04973	5	c116488.graph_c0;c148337.graph_c0;c152294.graph_c0;c164101.graph_c0;c174007.graph_c0;	K04456+K01203+K00844+K01540+K12047
Amoebiasis	ko05146	5	c106587.graph_c0;c124219.graph_c0;c17176.graph_c0;c17457.graph_c0;c47928.graph_c0;	K04634+K01476+K04345+K04634+K01476
Hepatitis C	ko05160	5	c111220.graph_c0;c116488.graph_c0;c188240.graph_c0;c70813.graph_c0;c84524.graph_c1;	K04382+K04456+K04441+K03083+K04354
Transcriptional misregulation in cancer	ko05202	5	c121162.graph_c0;c14937.graph_c0;c44803.graph_c0;c66832.graph_c0;c75722.graph_c0;	K15612+K11427+K11447+K06067+K11253
Prostate cancer	ko05215	5	c104046.graph_c0;c104046.graph_c1;c116488.graph_c0;c182800.graph_c0;c70813.graph_c0;	K04079+K04079+K04456+K04362+K03083
Butirosin and neomycin biosynthesis	ko00524	4	c140253.graph_c0;c152294.graph_c0;c64305.graph_c1;c94009.graph_c0;	K12407+K00844+K12407+K00844
Chemokine signaling pathway	ko04062	4	c116488.graph_c0;c141976.graph_c0;c17176.graph_c0;c70813.graph_c0;	K04456+K07860+K04345+K03083
Axon guidance	ko04360	4	c141976.graph_c0;c23877.graph_c0;c70813.graph_c0;c85990.graph_c0;	K07860+K04348+K03083+K04410
Signaling pathways regulating pluripotency of stem cells	ko04550	4	c116488.graph_c0;c182800.graph_c0;c188240.graph_c0;c70813.graph_c0;	K04456+K04362+K04441+K03083
B cell receptor signaling pathway	ko04662	4	c116488.graph_c0;c141976.graph_c0;c23877.graph_c0;c70813.graph_c0;	K04456+K07860+K04348+K03083
Fc gamma R-mediated phagocytosis	ko04666	4	c116488.graph_c0;c141976.graph_c0;c165092.graph_c0;c84638.graph_c0;	K04456+K07860+K05756+K04718
Circadian rhythm	ko04710	4	c125578.graph_c0;c152518.graph_c0;c44424.graph_c0;c88682.graph_c0;	K08960+K08959+K08960+K08960
Glutamatergic synapse	ko04724	4	c106587.graph_c0;c17176.graph_c0;c17457.graph_c0;c23877.graph_c0;	K04634+K04345+K04634+K04348
Cholinergic synapse	ko04725	4	c106587.graph_c0;c116488.graph_c0;c17176.graph_c0;c17457.graph_c0;	K04634+K04456+K04345+K04634
Insulin secretion	ko04911	4	c106587.graph_c0;c164101.graph_c0;c17176.graph_c0;c17457.graph_c0;	K04634+K01540+K04345+K04634
Type II diabetes mellitus	ko04930	4	c152294.graph_c0;c3265.graph_c0;c41028.graph_c0;c62938.graph_c0;	K00844+K00873+K00873+K00873
Type I diabetes mellitus	ko04940	4	c149966.graph_c0;c174062.graph_c0;c175536.graph_c0;c88286.graph_c0;	K01580+K01580+K01580+K01580
Pancreatic secretion	ko04972	4	c106587.graph_c0;c164101.graph_c0;c17457.graph_c0;c18819.graph_c0;	K04634+K01540+K04634+K05850
Protein digestion and absorption	ko04974	4	c164101.graph_c0;c175870.graph_c0;c96113.graph_c0;c97221.graph_c0;	K01540+K06002+K06002+K06002
Amyotrophic lateral sclerosis (ALS)	ko05014	4	c160135.graph_c0;c188240.graph_c0;c23877.graph_c0;c75729.graph_c0;	K08738+K04441+K04348+K04565
African trypanosomiasis	ko05143	4	c106587.graph_c0;c127720.graph_c0;c17457.graph_c0;c47469.graph_c0;	K04634+K00463+K04634+K00463
Colorectal cancer	ko05210	4	c116488.graph_c0;c141976.graph_c0;c160135.graph_c0;c70813.graph_c0;	K04456+K07860+K08738+K03083
Renal cell carcinoma	ko05211	4	c116488.graph_c0;c71512.graph_c0;c7334.graph_c0;c85990.graph_c0;	K04456+K01679+K01679+K04410
Choline metabolism in cancer	ko05231	4	c116488.graph_c0;c141976.graph_c0;c179962.graph_c0;c99797.graph_c0;	K04456+K07860+K06128+K15377
Dilated cardiomyopathy	ko05414	4	c143028.graph_c0;c17176.graph_c0;c47275.graph_c0;c57470.graph_c0;	K05692+K04345+K05692+K05692
Renin-angiotensin system	ko04614	3	c136263.graph_c0;c3384.graph_c0;c55792.graph_c0;	K01389+K01393+K01393
Fc epsilon RI signaling pathway	ko04664	3	c116488.graph_c0;c141976.graph_c0;c188240.graph_c0;	K04456+K07860+K04441
TNF signaling pathway	ko04668	3	c116488.graph_c0;c188240.graph_c0;c96383.graph_c0;	K04456+K04441+K05632
Serotonergic synapse	ko04726	3	c106587.graph_c0;c17176.graph_c0;c17457.graph_c0;	K04634+K04345+K04634
Long-term depression	ko04730	3	c106587.graph_c0;c111220.graph_c0;c17457.graph_c0;	K04634+K04382+K04634
Prolactin signaling pathway	ko04917	3	c116488.graph_c0;c188240.graph_c0;c70813.graph_c0;	K04456+K04441+K03083
Collecting duct acid secretion	ko04966	3	c113419.graph_c0;c140374.graph_c0;c40503.graph_c0;	K02152+K02146+K02146
Fat digestion and absorption	ko04975	3	c156287.graph_c0;c89595.graph_c0;c93587.graph_c2;	K14455+K14455+K14455
Hepatitis B	ko05161	3	c116488.graph_c0;c160135.graph_c0;c77322.graph_c0;	K04456+K08738+K11594
Rheumatoid arthritis	ko05323	3	c113419.graph_c0;c140374.graph_c0;c40503.graph_c0;	K02152+K02146+K02146
Hypertrophic cardiomyopathy (HCM)	ko05410	3	c143028.graph_c0;c47275.graph_c0;c57470.graph_c0;	K05692+K05692+K05692
Arrhythmogenic right ventricular cardiomyopathy (ARVC)	ko05412	3	c143028.graph_c0;c47275.graph_c0;c57470.graph_c0;	K05692+K05692+K05692
Glycosaminoglycan biosynthesis - keratan sulfate	ko00533	2	c106470.graph_c0;c64564.graph_c0;	K00741+K00717
Glycosphingolipid biosynthesis - lacto and neolacto series	ko00601	2	c106470.graph_c0;c108572.graph_c0;	K00741+K07819
Cell adhesion molecules (CAMs)	ko04514	2	c110153.graph_c0;c47358.graph_c0;	K06087+K06087
Natural killer cell mediated cytotoxicity	ko04650	2	c141976.graph_c0;c23877.graph_c0;	K07860+K04348
Ovarian steroidogenesis	ko04913	2	c11025.graph_c0;c17176.graph_c0;	K07408+K04345
Prion diseases	ko05020	2	c17176.graph_c0;c75729.graph_c0;	K04345+K04565
MicroRNAs in cancer	ko05206	2	c156320.graph_c0;c157786.graph_c0;	K04464+K06252
Pancreatic cancer	ko05212	2	c116488.graph_c0;c141976.graph_c0;	K04456+K07860
Endometrial cancer	ko05213	2	c116488.graph_c0;c70813.graph_c0;	K04456+K03083
Melanoma	ko05218	2	c116488.graph_c0;c182800.graph_c0;	K04456+K04362
Chronic myeloid leukemia	ko05220	2	c116488.graph_c0;c66832.graph_c0;	K04456+K06067
Small cell lung cancer	ko05222	2	c116488.graph_c0;c160135.graph_c0;	K04456+K08738
D-Arginine and D-ornithine metabolism	ko00472	1	c105074.graph_c0;	K00273
Cytokine-cytokine receptor interaction	ko04060	1	c90446.graph_c0;	K05061
Intestinal immune network for IgA production	ko04672	1	c113528.graph_c0;	K04466
Taste transduction	ko04742	1	c17176.graph_c0;	K04345
Aldosterone-regulated sodium reabsorption	ko04960	1	c164101.graph_c0;	K01540
Vasopressin-regulated water reabsorption	ko04962	1	c17176.graph_c0;	K04345
Mineral absorption	ko04978	1	c164101.graph_c0;	K01540
Cocaine addiction	ko05030	1	c17176.graph_c0;	K04345
Morphine addiction	ko05032	1	c17176.graph_c0;	K04345
Basal cell carcinoma	ko05217	1	c70813.graph_c0;	K03083
Acute myeloid leukemia	ko05221	1	c116488.graph_c0;	K04456
Non-small cell lung cancer	ko05223	1	c116488.graph_c0;	K04456
