# Supplementary material for: Sexual Transcription Differences in Brachymeria lasus (Hymenoptera: Chalcididae), a Pupal Parasitoid Species of Lymantria dispar (Lepidoptera: Lymantriidae)
Source: Front Genet. 2019 Mar 5;10:172. doi: 10.3389/fgene.2019.00172 (PMC6411638; doi:10.3389/fgene.2019.00172)
Supplement: Supplementary file 1 [file Data_Sheet_1.ZIP › Supplementary/Table S5.xlsx]

## Sheet: biomarker (81)
#ID	FDR	log2FC	regulated (female vs male)	COG_class_annotation	GO_annotation	KEGG_annotation	Swissprot_annotation	nr_annotation
c99973.graph_c0	1.4331e-06	-4.10702	down	Translation, ribosomal structure and biogenesis	--	--	Ribonuclease Oy OS=Crassostrea gigas (Pacific oyster) PE=1 SV=1	PREDICTED: ribonuclease Oy-like [Nasonia vitripennis]
c99968.graph_c2	0.000341796	1.71678	up	--	Molecular Function: nucleotide binding (GO:0000166);; Molecular Function: protein serine/threonine kinase activity (GO:0004674);; Biological Process: phosphorylation (GO:0016310);; Molecular Function: ion binding (GO:0043167);;	K18050|8.32021e-70|nvi:100114311|protein kinase C; K18050 novel protein kinase C epsilon type [EC:2.7.11.13] (A)	Calcium-independent protein kinase C GN=PRKC2 OS=Aplysia californica (California sea hare) PE=1 SV=1	PREDICTED: protein kinase C isoform X3 [Nasonia vitripennis]
c99965.graph_c0	0.0081223	-1.29432	down	Posttranslational modification, protein turnover, chaperones	Molecular Function: ATP binding (GO:0005524);; Cellular Component: cytoplasm (GO:0005737);; Biological Process: cation transport (GO:0006812);; Biological Process: response to stress (GO:0006950);; Molecular Function: solute:proton antiporter activity (GO:0015299);; Cellular Component: integral component of membrane (GO:0016021);; Biological Process: protein refolding (GO:0042026);; Biological Pr…	K04077|0|nvi:100114031|60 kDa heat shock protein, mitochondrial-like; K04077 chaperonin GroEL (A)	60 kDa heat shock protein, mitochondrial (Precursor) GN=Hsp60 OS=Drosophila melanogaster (Fruit fly) PE=1 SV=3	heat shock protein 60 [Pteromalus puparum]
c99904.graph_c0	2.27411e-16	-6.34939	down	--	Cellular Component: nucleus (GO:0005634);; Biological Process: cell cycle arrest (GO:0007050);;	K10141|1.08507e-151|ame:411048|GB12961; sestrin homolog; K10141 sestrin (A)	Sestrin homolog GN=Sesn OS=Drosophila melanogaster (Fruit fly) PE=1 SV=2	Putative sestrin [Camponotus floridanus]
c99895.graph_c0	0.00286615	1.45093	up	--	Biological Process: ion transport (GO:0006811);; Molecular Function: potassium:chloride symporter activity (GO:0015379);; Cellular Component: integral component of membrane (GO:0016021);; Biological Process: transmembrane transport (GO:0055085);;	--	Sodium/chloride cotransporter 3 GN=kcc-3 OS=Caenorhabditis elegans PE=4 SV=1	hypothetical protein AaeL_AAEL012335 [Aedes aegypti]
c99883.graph_c0	0.00703309	-2.97465	down	--	--	--	--	PREDICTED: uncharacterized protein LOC103316199 isoform X2 [Nasonia vitripennis]
c99882.graph_c0	0.0084882	2.89352	up	--	--	--	--	--
c99864.graph_c0	0.0064876	-6.93281	down	--	--	--	--	--
c99862.graph_c0	2.81334e-28	-7.27808	down	--	--	K13718|0|nvi:100118517|uncharacterized LOC100118517; K13718 OTU domain-containing protein 4 [EC:3.4.19.12] (A)	Protein ovarian tumor locus GN=otu OS=Drosophila melanogaster (Fruit fly) PE=2 SV=2	PREDICTED: uncharacterized protein LOC100118517 isoform X3 [Nasonia vitripennis]
c99825.graph_c0	9.16032e-28	-5.50814	down	Cell cycle control, cell division, chromosome partitioning	Biological Process: regulation of cell cycle (GO:0051726);;	K06627|0|nvi:100116491|cycA; cyclin-A1; K06627 cyclin A (A)	G2/mitotic-specific cyclin-A OS=Patella vulgata (Common limpet) PE=2 SV=1	PREDICTED: cyclin-A1 [Nasonia vitripennis]
c99821.graph_c0	1.62519e-46	-9.28947	down	--	--	--	--	PREDICTED: uncharacterized protein LOC100117558 [Nasonia vitripennis]
c99812.graph_c0	0.00931825	-1.81038	down	--	--	K15170|6.81917e-171|nvi:100114923|mediator of RNA polymerase II transcription subunit 27; K15170 mediator of RNA polymerase II transcription subunit 27 (A)	Mediator of RNA polymerase II transcription subunit 27 GN=MED27 OS=Anopheles gambiae (African malaria mosquito) PE=3 SV=3	PREDICTED: mediator of RNA polymerase II transcription subunit 27 [Nasonia vitripennis]
c99807.graph_c0	0.0072041	1.50795	up	--	--	--	--	--
c99758.graph_c0	0.00111038	-3.60276	down	--	--	--	--	--
c99735.graph_c0	0.00314196	2.27949	up	--	Molecular Function: hormone activity (GO:0005179);; Cellular Component: extracellular region (GO:0005576);;	--	Diuretic hormone OS=Stomoxys calcitrans (Stable fly) PE=1 SV=1	PREDICTED: uncharacterized protein LOC100679179 [Nasonia vitripennis]
c99727.graph_c0	2.26284e-14	Inf	down	--	--	--	--	--
c99724.graph_c0	0.0055529	-2.92388	down	--	--	--	Putative fatty acyl-CoA reductase CG5065 {ECO:0000250|UniProtKB:Q922J9, ECO:0000312|EMBL:AAF57974.1} GN=CG5065 OS=Drosophila melanogaster (Fruit fly) PE=3 SV=1	PREDICTED: fatty acyl-CoA reductase 1-like [Nasonia vitripennis]
c99711.graph_c0	1.56826e-08	-4.79576	down	--	--	--	--	PREDICTED: uncharacterized protein LOC100679663 [Nasonia vitripennis]
c99698.graph_c1	5.18501e-05	-3.55704	down	Replication, recombination and repair	Molecular Function: DNA-directed RNA polymerase activity (GO:0003899);; Biological Process: DNA replication (GO:0006260);;	K02684|0|nvi:100117238|DNA primase small subunit; K02684 DNA primase small subunit [EC:2.7.7.-] (A)	DNA primase small subunit GN=DNApol-alpha50 OS=Drosophila melanogaster (Fruit fly) PE=2 SV=2	PREDICTED: DNA primase small subunit [Nasonia vitripennis]
c99689.graph_c0	0.00153316	1.71804	up	--	--	--	--	--
c99686.graph_c0	0.0051547	3.06681	up	--	--	K10448|0|ame:411968|KLHL10, GB12199; kelch-like 10 (Drosophila); K10448 kelch-like protein 10 (A)	Kelch-like protein diablo {ECO:0000250|UniProtKB:Q9VUU5} OS=Drosophila grimshawi (Fruit fly) PE=3 SV=1	PREDICTED: kelch-like protein 10 [Solenopsis invicta]
c99617.graph_c0	8.67382e-16	Inf	down	--	--	--	--	--
c99614.graph_c0	6.26726e-10	-3.17108	down	--	--	--	--	PREDICTED: LOW QUALITY PROTEIN: monocarboxylate transporter 12-like [Nasonia vitripennis]
c99609.graph_c0	2.43684e-06	Inf	down	--	--	--	--	--
c99568.graph_c0	0.00510012	-6.62847	down	--	Molecular Function: sequence-specific DNA binding transcription factor activity (GO:0003700);; Cellular Component: nucleus (GO:0005634);; Biological Process: regulation of transcription, DNA-templated (GO:0006355);; Molecular Function: sequence-specific DNA binding (GO:0043565);;	K09320|9.52337e-55|nvi:100104126|Eve; even-skipped; K09320 homeobox even-skipped homolog protein (A)	Segmentation protein even-skipped GN=eve OS=Drosophila melanogaster (Fruit fly) PE=1 SV=3	even-skipped [Nasonia vitripennis]
c99547.graph_c0	0.00497134	1.55089	up	--	--	--	Leucine-rich repeat-containing protein egg-6 (Precursor) OS=Caenorhabditis elegans PE=2 SV=2	PREDICTED: leucine-rich repeats and immunoglobulin-like domains protein 3 [Nasonia vitripennis]
c99529.graph_c0	0.00114282	3.35265	up	--	--	--	--	PREDICTED: uncharacterized protein LOC103316119 [Nasonia vitripennis]
c99516.graph_c0	0.00139347	1.57386	up	--	--	--	--	--
c99498.graph_c0	0.00635991	-2.76726	down	Nucleotide transport and metabolism	--	--	Adenosine deaminase AGSA (Precursor) OS=Aplysia californica (California sea hare) PE=1 SV=2	PREDICTED: adenosine deaminase CECR1-like [Nasonia vitripennis]
c99494.graph_c0	9.33359e-09	-7.40436	down	--	--	--	--	endonuclease-like venom protein precursor [Nasonia vitripennis]
c99472.graph_c0	0.000518819	-2.28735	down	--	--	--	--	--
c99423.graph_c0	0.000498357	3.96251	up	Secondary metabolites biosynthesis, transport and catabolism	Molecular Function: oxidoreductase activity (GO:0016491);; Molecular Function: metal ion binding (GO:0046872);;	--	Cytochrome P450 CYP12A2 GN=CYP12A2 OS=Musca domestica (House fly) PE=2 SV=1	PREDICTED: probable cytochrome P450 12a5, mitochondrial-like [Apis dorsata]
c99379.graph_c0	3.74539e-06	2.09471	up	--	--	--	--	PREDICTED: serine protease inhibitor Kazal-type 10-like [Nasonia vitripennis]
c99370.graph_c1	9.21695e-07	Inf	down	--	--	--	Phospholipase A1 (Precursor) OS=Polybia paulista (Neotropical social wasp) PE=1 SV=1	PREDICTED: lipase member H-like [Nasonia vitripennis]
c99370.graph_c0	6.58756e-08	Inf	down	--	--	--	Probable phospholipase A1 magnifin (Precursor) OS=Vespa magnifica (Hornet) PE=1 SV=1	PREDICTED: pancreatic triacylglycerol lipase-like [Nasonia vitripennis]
c99365.graph_c0	1.86289e-05	-2.37626	down	Intracellular trafficking, secretion, and vesicular transport	Cellular Component: membrane (GO:0016020);;	K17797|6.19319e-127|nvi:100120581|mitochondrial inner membrane protein COX18; K17797 mitochondrial inner membrane protein COX18 (A)	--	PREDICTED: mitochondrial inner membrane protein COX18 isoform X1 [Nasonia vitripennis]
c99364.graph_c1	0.00603655	-1.2695	down	--	--	--	Probable salivary secreted peptide (Precursor) OS=Bombus ignitus (Bumblebee) PE=2 SV=1	PREDICTED: probable salivary secreted peptide [Nasonia vitripennis]
c99364.graph_c0	0.00708956	-2.61909	down	--	--	--	--	PREDICTED: probable salivary secreted peptide [Nasonia vitripennis]
c99310.graph_c0	0.000502975	1.69593	up	--	--	--	--	--
c99288.graph_c1	0.000133267	1.88373	up	--	--	--	--	--
c99282.graph_c0	0.00224251	-3.40639	down	--	--	--	--	PREDICTED: gastrin-releasing peptide receptor-like [Nasonia vitripennis]
c99281.graph_c0	6.25201e-07	2.24233	up	--	--	--	--	--
c99274.graph_c0	1.70278e-11	-8.23755	down	--	--	--	--	--
c99273.graph_c1	0.00820154	-1.30122	down	--	Molecular Function: protein serine/threonine kinase activity (GO:0004674);; Molecular Function: ATP binding (GO:0005524);; Biological Process: protein phosphorylation (GO:0006468);;	K04430|0|nvi:100119456|dual specificity mitogen-activated protein kinase kinase 4-like; K04430 mitogen-activated protein kinase kinase 4 [EC:2.7.12.2] (A)	MAP kinase kinase mkk-4 GN=mkk-4 OS=Caenorhabditis elegans PE=3 SV=3	PREDICTED: dual specificity mitogen-activated protein kinase kinase 4-like [Nasonia vitripennis]
c99270.graph_c0	0.00998212	1.60387	up	--	Molecular Function: RNA binding (GO:0003723);; Molecular Function: nitric-oxide synthase activity (GO:0004517);; Molecular Function: iron ion binding (GO:0005506);; Molecular Function: calmodulin binding (GO:0005516);; Biological Process: nitric oxide biosynthetic process (GO:0006809);; Molecular Function: zinc ion binding (GO:0008270);; Molecular Function: FMN binding (GO:0010181);; Molecular Fu…	K13253|0|nvi:100313941|Nos; nitric oxide synthase (EC:1.14.13.39); K13253 nitric-oxide synthase, invertebrate [EC:1.14.13.39] (A)	Nitric oxide synthase, salivary gland OS=Rhodnius prolixus (Triatomid bug) PE=2 SV=1	nitric oxide synthase [Nasonia vitripennis]
c99269.graph_c0	0.000497392	2.26281	up	--	--	--	--	PREDICTED: actin-binding Rho-activating protein-like [Nasonia vitripennis]
c99245.graph_c0	1.92513e-14	-7.99342	down	--	Molecular Function: catalytic activity (GO:0003824);;	K00665|6.84557e-30|nvi:100122083|fatty acid synthase-like; K00665 fatty acid synthase, animal type [EC:2.3.1.85] (A)	--	PREDICTED: fatty acid synthase-like [Nasonia vitripennis]
c99222.graph_c0	0.00565276	1.43732	up	--	--	--	--	--
c99220.graph_c0	0.00849357	2.12159	up	--	--	--	--	--
c99210.graph_c0	0.00746872	1.83897	up	Translation, ribosomal structure and biogenesis	Molecular Function: structural constituent of ribosome (GO:0003735);; Cellular Component: ribosome (GO:0005840);; Biological Process: translation (GO:0006412);;	--	39S ribosomal protein L11, mitochondrial (Precursor) GN=mRpL11 OS=Drosophila melanogaster (Fruit fly) PE=1 SV=1	PREDICTED: spindle and kinetochore-associated protein 1-like [Nasonia vitripennis]
c99205.graph_c1	1.65428e-05	-2.20734	down	--	Molecular Function: ATP binding (GO:0005524);; Biological Process: ATP catabolic process (GO:0006200);; Cellular Component: integral component of membrane (GO:0016021);; Molecular Function: ATPase activity, coupled to transmembrane movement of substances (GO:0042626);; Biological Process: transmembrane transport (GO:0055085);;	K05677|1.83853e-110|nvi:100122388|ATP-binding cassette sub-family D member 3; K05677 ATP-binding cassette, subfamily D (ALD), member 3 (A)	--	PREDICTED: ATP-binding cassette sub-family D member 3 [Nasonia vitripennis]
c99154.graph_c0	0.00863272	1.92315	up	--	--	--	--	--
c99145.graph_c0	4.95876e-31	-10.8663	down	General function prediction only	--	--	Ankyrin repeat, PH and SEC7 domain containing protein secG GN=secG OS=Dictyostelium discoideum (Slime mold) PE=2 SV=1	PREDICTED: serine/threonine-protein phosphatase 6 regulatory ankyrin repeat subunit A-like [Nasonia vitripennis]
c99111.graph_c0	2.78104e-05	5.61624	up	--	--	--	--	PREDICTED: uncharacterized protein LOC100680417 [Nasonia vitripennis]
c99106.graph_c1	7.60658e-05	-2.7194	down	Lipid transport and metabolism	--	--	Esterase E4 (Precursor) OS=Myzus persicae (Green peach aphid) PE=1 SV=1	carboxylesterase clade A, member 3 [Nasonia vitripennis]
c99087.graph_c0	0.00723741	2.90452	up	--	--	--	--	PREDICTED: E3 ubiquitin-protein ligase MARCH3-like [Nasonia vitripennis]
c99046.graph_c0	0.000431208	-3.41157	down	--	--	--	--	PREDICTED: uncharacterized protein LOC100679768 [Nasonia vitripennis]
c99035.graph_c0	0.00660038	-7.40361	down	General function prediction only	--	--	Lipase 3 (Precursor) GN=Lip3 OS=Drosophila melanogaster (Fruit fly) PE=2 SV=1	PREDICTED: gastric triacylglycerol lipase-like, partial [Nasonia vitripennis]
c99017.graph_c0	0.000241332	4.38358	up	--	Cellular Component: mitochondrion (GO:0005739);; Biological Process: ion transport (GO:0006811);; Biological Process: single-organism cellular process (GO:0044763);;	--	Voltage-dependent anion-selective channel GN=porin OS=Drosophila melanogaster (Fruit fly) PE=1 SV=3	PREDICTED: voltage-dependent anion-selective channel-like [Nasonia vitripennis]
c99013.graph_c0	0.00407843	-2.1805	down	Carbohydrate transport and metabolism	Biological Process: metabolic process (GO:0008152);; Molecular Function: hydrolase activity, acting on glycosyl bonds (GO:0016798);;	K01187|0|nvi:100122024|alpha-glucosidase-like; K01187 alpha-glucosidase [EC:3.2.1.20] (A)	Maltase 1 (Precursor) GN=Mal-B1 OS=Drosophila virilis (Fruit fly) PE=3 SV=2	alpha-glucosidase-like precursor [Nasonia vitripennis]
c99003.graph_c0	4.2122e-05	-1.90877	down	--	--	--	--	PREDICTED: uncharacterized protein LOC100678658 [Nasonia vitripennis]
c98997.graph_c0	0.00131034	2.35349	up	--	--	--	--	PREDICTED: piggyBac transposable element-derived protein 4 [Tribolium castaneum]
c98991.graph_c1	4.55179e-11	-6.39244	down	General function prediction only	Molecular Function: nucleic acid binding (GO:0003676);; Molecular Function: metal ion binding (GO:0046872);;	K09231|2.38457e-105|ame:411166|Kr, GB16053; krueppel; K09231 krueppel-like family, other (A)	Protein krueppel GN=Kr OS=Drosophila melanogaster (Fruit fly) PE=1 SV=2	PREDICTED: protein krueppel-like [Apis florea]
c98982.graph_c1	0.0078804	1.52582	up	--	--	--	--	--
c98979.graph_c0	3.67542e-15	-3.70976	down	Carbohydrate transport and metabolism	Biological Process: metabolic process (GO:0008152);; Molecular Function: hydrolase activity, acting on glycosyl bonds (GO:0016798);;	K01176|0|nvi:100118139|alpha-amylase-like; K01176 alpha-amylase [EC:3.2.1.1] (A)	Alpha-amylase OS=Tenebrio molitor (Yellow mealworm beetle) PE=1 SV=1	PREDICTED: alpha-amylase-like [Nasonia vitripennis]
c98942.graph_c0	6.72382e-06	3.37581	up	--	--	--	--	--
c98906.graph_c0	0.000176578	-4.32975	down	--	--	--	--	PREDICTED: uncharacterized protein LOC100679397 [Nasonia vitripennis]
c98889.graph_c0	4.77033e-06	-6.22953	down	--	--	--	--	PREDICTED: uncharacterized protein LOC100678252, partial [Nasonia vitripennis]
c98888.graph_c0	0.00161666	1.72207	up	--	--	--	--	PREDICTED: uncharacterized protein LOC105194538 [Solenopsis invicta]
c98870.graph_c0	0.00342371	-2.99964	down	--	--	--	--	--
c98826.graph_c0	6.23448e-06	-2.06152	down	--	--	--	BTB and MATH domain-containing protein 43 GN=bath-43 OS=Caenorhabditis elegans PE=3 SV=2	PREDICTED: speckle-type POZ protein B-like [Nasonia vitripennis]
c98816.graph_c0	0.0090531	1.29216	up	--	Biological Process: lipid metabolic process (GO:0006629);; Molecular Function: oxidoreductase activity (GO:0016491);;	--	Acyl-CoA Delta(11) desaturase OS=Spodoptera littoralis (Egyptian cotton leafworm) PE=1 SV=1	PREDICTED: acyl-CoA Delta(11) desaturase-like [Nasonia vitripennis]
c98803.graph_c0	3.48936e-25	-7.51368	down	--	--	--	--	PREDICTED: uncharacterized protein DDB_G0283357-like isoform X1 [Nasonia vitripennis]
c98768.graph_c0	0.0037593	1.69978	up	--	Molecular Function: DNA binding (GO:0003677);; Cellular Component: nucleus (GO:0005634);; Biological Process: regulation of transcription, DNA-templated (GO:0006355);; Biological Process: muscle organ development (GO:0007517);; Molecular Function: protein dimerization activity (GO:0046983);;	K18484|1.07377e-104|nvi:100123796|G-box-binding factor; K18484 myogenic factor 5 (A)	Myogenic-determination protein GN=nau OS=Drosophila melanogaster (Fruit fly) PE=2 SV=3	PREDICTED: G-box-binding factor isoform X1 [Nasonia vitripennis]
c98722.graph_c0	5.98142e-15	-7.32955	down	--	--	--	Transcription factor hamlet GN=ham OS=Drosophila melanogaster (Fruit fly) PE=2 SV=1	hypothetical protein KGM_13171 [Danaus plexippus]
c98682.graph_c0	0.000637063	1.65327	up	General function prediction only	Molecular Function: GTPase activity (GO:0003924);; Molecular Function: tyrosine 3-monooxygenase activity (GO:0004511);; Molecular Function: iron ion binding (GO:0005506);; Molecular Function: GTP binding (GO:0005525);; Cellular Component: transcription factor TFIIE complex (GO:0005673);; Biological Process: GTP catabolic process (GO:0006184);; Biological Process: transcription initiation from RNA…	--	Ras-like protein rasD (Precursor) GN=rasD OS=Dictyostelium discoideum (Slime mold) PE=2 SV=2	PREDICTED: ras-related and estrogen-regulated growth inhibitor [Nasonia vitripennis]
c98679.graph_c0	1.91198e-50	-8.66699	down	--	--	--	--	--
c98649.graph_c0	9.65649e-05	-2.13525	down	Cell wall/membrane/envelope biogenesis	Molecular Function: zinc ion binding (GO:0008270);; Molecular Function: N-acetylmuramoyl-L-alanine amidase activity (GO:0008745);; Biological Process: peptidoglycan catabolic process (GO:0009253);;	K01446|1.13434e-90|nvi:100121609|peptidoglycan-recognition protein SC2-like; K01446 N-acetylmuramoyl-L-alanine amidase [EC:3.5.1.28] (A)	Peptidoglycan-recognition protein SD (Precursor) GN=PGRP-SD OS=Drosophila simulans (Fruit fly) PE=3 SV=1	PREDICTED: peptidoglycan-recognition protein SC2-like [Nasonia vitripennis]
c98639.graph_c0	0.00111174	-3.16808	down	Replication, recombination and repair	Molecular Function: transferase activity (GO:0016740);;	--	--	PREDICTED: methylated-DNA--protein-cysteine methyltransferase [Nasonia vitripennis]
c98615.graph_c0	1.64934e-27	8.77239	up	--	--	--	--	PREDICTED: TNF receptor-associated factor family protein DDB_G0272098-like [Nasonia vitripennis]
c98603.graph_c1	3.88755e-06	-5.6515	down	--	--	K18420|1.68264e-32|nvi:100677953|interferon-inducible double-stranded RNA-dependent protein kinase activator A homolog B-like; K18420 RISC-loading complex subunit TARBP2 (A)	--	PREDICTED: interferon-inducible double-stranded RNA-dependent protein kinase activator A homolog B-like isoform X2 [Nasonia vitripennis]
c98603.graph_c0	0.000104665	-4.28959	down	--	--	K18420|1.61835e-17|nvi:100677953|interferon-inducible double-stranded RNA-dependent protein kinase activator A homolog B-like; K18420 RISC-loading complex subunit TARBP2 (A)	--	PREDICTED: probable RISC-loading complex subunit BRAFLDRAFT_242885 [Camponotus floridanus]
c98584.graph_c0	0.00110709	-2.96675	down	--	--	--	--	PREDICTED: uncharacterized protein LOC100679999 [Nasonia vitripennis]
c98582.graph_c0	0.00334552	3.2718	up	--	--	--	--	PREDICTED: uncharacterized protein LOC100119104 [Nasonia vitripennis]
c98545.graph_c0	2.77967e-16	Inf	down	Posttranslational modification, protein turnover, chaperones	--	K03094|2.20577e-28|nvi:100119117|Skp1; S phase kinase associated protein 1; K03094 S-phase kinase-associated protein 1 (A)	SCF ubiquitin ligase complex protein SKP1a(6-162) GN=fpaA OS=Dictyostelium discoideum (Slime mold) PE=1 SV=1	S phase kinase associated protein 1 [Nasonia vitripennis]
c98537.graph_c0	0.00332644	3.23397	up	--	Molecular Function: G-protein coupled receptor activity (GO:0004930);; Biological Process: G-protein coupled receptor signaling pathway (GO:0007186);; Cellular Component: integral component of membrane (GO:0016021);;	--	Dopamine D2-like receptor GN=D2R OS=Drosophila melanogaster (Fruit fly) PE=2 SV=1	PREDICTED: dopamine D2-like receptor [Nasonia vitripennis]
c98534.graph_c0	8.95755e-13	-8.31278	down	--	Cellular Component: chromosome (GO:0005694);;	--	Histone H1, early embryonic OS=Strongylocentrotus purpuratus (Purple sea urchin) PE=2 SV=1	PREDICTED: histone H1B-like [Nasonia vitripennis]
c98524.graph_c0	0.000275176	1.82664	up	--	--	--	--	--
c98448.graph_c0	0.000154659	1.73091	up	--	Molecular Function: nucleotide binding (GO:0000166);; Molecular Function: transmembrane receptor protein tyrosine kinase activity (GO:0004714);; Cellular Component: membrane (GO:0016020);; Biological Process: phosphorylation (GO:0016310);; Biological Process: single-organism process (GO:0044699);; Biological Process: regulation of cellular process (GO:0050794);;	K04362|0|nvi:100114847|fibroblast growth factor receptor homolog 1-like; K04362 fibroblast growth factor receptor 1 [EC:2.7.10.1] (A)	Fibroblast growth factor receptor homolog 1 (Precursor) GN=htl OS=Drosophila melanogaster (Fruit fly) PE=1 SV=3	PREDICTED: LOW QUALITY PROTEIN: fibroblast growth factor receptor homolog 1-like [Nasonia vitripennis]
c98446.graph_c0	1.82247e-07	-4.03472	down	Cytoskeleton	Molecular Function: microtubule motor activity (GO:0003777);; Molecular Function: ATP binding (GO:0005524);; Cellular Component: kinesin complex (GO:0005871);; Cellular Component: microtubule (GO:0005874);; Biological Process: microtubule-based movement (GO:0007018);; Molecular Function: microtubule binding (GO:0008017);;	K10398|1.12587e-175|nvi:100116207|kinesin-5; kinesin 5; K10398 kinesin family member 11 (A)	Kinesin-like protein KLP2 (Fragment) OS=Bombyx mori (Silk moth) PE=2 SV=1	PREDICTED: bipolar kinesin KRP-130 isoform X2 [Nasonia vitripennis]
c98442.graph_c1	0.00489615	1.45741	up	--	--	--	--	PREDICTED: uncharacterized protein LOC100679306 isoform X2 [Nasonia vitripennis]
c98442.graph_c0	0.00815346	1.31638	up	--	--	--	--	PREDICTED: uncharacterized protein LOC100679306 isoform X1 [Nasonia vitripennis]
c98426.graph_c0	0.00530091	-2.65731	down	Carbohydrate transport and metabolism	Molecular Function: alpha-1,4-glucosidase activity (GO:0004558);; Biological Process: carbohydrate metabolic process (GO:0005975);; Molecular Function: cation binding (GO:0043169);;	K01187|0|nvi:100122011|alpha-glucosidase-like; K01187 alpha-glucosidase [EC:3.2.1.20] (A)	Maltase 1 (Precursor) GN=Mal-B1 OS=Drosophila virilis (Fruit fly) PE=3 SV=2	alpha-glucosidase-like [Nasonia vitripennis]
c98423.graph_c0	1.71761e-05	-5.76695	down	--	--	--	--	--
c98419.graph_c0	0.0090531	1.71521	up	--	--	--	Lachesin (Precursor) GN=LAC OS=Schistocerca americana (American grasshopper) PE=1 SV=1	PREDICTED: lachesin-like [Nasonia vitripennis]
c98402.graph_c0	0.00576391	2.38829	up	--	--	--	--	--
c98384.graph_c0	1.90331e-05	-3.49468	down	--	Molecular Function: protein serine/threonine kinase activity (GO:0004674);; Molecular Function: ATP binding (GO:0005524);; Biological Process: protein phosphorylation (GO:0006468);;	K11479|0|nvi:100122583|aurora kinase B; K11479 aurora kinase B [EC:2.7.11.1] (A)	Aurora kinase B GN=ial OS=Drosophila melanogaster (Fruit fly) PE=1 SV=1	PREDICTED: aurora kinase B [Nasonia vitripennis]
c98364.graph_c0	1.2591e-11	-10.5271	down	--	--	--	--	--
c98363.graph_c0	9.66503e-05	-4.02581	down	--	--	--	--	PREDICTED: uncharacterized protein LOC100678542 [Nasonia vitripennis]
c98297.graph_c0	4.75692e-06	-2.22756	down	Cell wall/membrane/envelope biogenesis	--	--	Peptidoglycan-recognition protein LE GN=PGRP-LE OS=Drosophila melanogaster (Fruit fly) PE=1 SV=1	peptidoglycan-recognition protein S2-like protein [Nasonia vitripennis]
c98293.graph_c0	1.09798e-09	-2.67384	down	--	Biological Process: metabolic process (GO:0008152);; Molecular Function: oxidoreductase activity (GO:0016491);;	--	Phenoloxidase subunit 1 (Precursor) OS=Bombyx mori (Silk moth) PE=1 SV=2	diphenol oxidase 1 [Nasonia vitripennis]
c98292.graph_c0	0.00628086	1.33015	up	--	--	--	Serine/threonine-protein kinase dkf-2 {ECO:0000303|PubMed:17728253} GN=dkf-2 OS=Caenorhabditis elegans PE=1 SV=4	PREDICTED: uncharacterized protein LOC100116062 isoform X1 [Nasonia vitripennis]
c98286.graph_c0	3.65374e-17	-7.60719	down	--	Biological Process: metabolic process (GO:0008152);; Molecular Function: transferase activity (GO:0016740);;	K00665|4.68088e-56|nvi:100122083|fatty acid synthase-like; K00665 fatty acid synthase, animal type [EC:2.3.1.85] (A)	--	PREDICTED: fatty acid synthase-like [Nasonia vitripennis]
c98253.graph_c0	0.000367905	-1.68281	down	--	--	--	--	PREDICTED: gamma-gliadin-like isoform X2 [Nasonia vitripennis]
c98226.graph_c0	4.95175e-06	-8.55031	down	--	--	--	--	PREDICTED: uncharacterized protein LOC100116826 [Nasonia vitripennis]
c98192.graph_c0	0.00127402	3.5823	up	--	--	--	--	--
c98163.graph_c0	0.00327983	-1.35746	down	--	--	--	Probable very-long-chain enoyl-CoA reductase art-1 GN=art-1 OS=Caenorhabditis elegans PE=3 SV=1	PREDICTED: WD repeat-containing protein 65-like [Nasonia vitripennis]
c98150.graph_c0	2.05032e-09	2.5326	up	Nucleotide transport and metabolism	Molecular Function: thymidylate synthase activity (GO:0004799);; Biological Process: dTMP biosynthetic process (GO:0006231);; Biological Process: dTTP biosynthetic process (GO:0006235);; Biological Process: methylation (GO:0032259);;	--	Thymidylate synthase GN=Ts OS=Drosophila melanogaster (Fruit fly) PE=1 SV=2	PREDICTED: transmembrane protein 184C-like [Nasonia vitripennis]
c98110.graph_c0	1.43269e-09	-2.88	down	--	--	--	Probable E3 ubiquitin-protein ligase HERC2 GN=HERC2 OS=Drosophila melanogaster (Fruit fly) PE=1 SV=3	PREDICTED: protein RCC2 homolog isoform X2 [Nasonia vitripennis]
c98108.graph_c0	0.00248295	-6.20015	down	Posttranslational modification, protein turnover, chaperones	--	K03094|1.70781e-29|bmor:733106|S-phase kinase-associated protein; K03094 S-phase kinase-associated protein 1 (A)	SCF ubiquitin ligase complex protein SKP1b(6-162) GN=DDB_G0273615 OS=Dictyostelium discoideum (Slime mold) PE=1 SV=1	S-phase kinase-associated protein [Bombyx mori]
c98050.graph_c0	0.00527383	1.68599	up	--	Cellular Component: integral component of membrane (GO:0016021);;	--	--	PREDICTED: transmembrane protein 181 [Nasonia vitripennis]
c98014.graph_c0	3.02407e-26	-6.68071	down	Secondary metabolites biosynthesis, transport and catabolism	Biological Process: metabolic process (GO:0008152);; Molecular Function: transferase activity (GO:0016740);;	K00665|4.09364e-110|nvi:100122083|fatty acid synthase-like; K00665 fatty acid synthase, animal type [EC:2.3.1.85] (A)	Probable polyketide synthase 3 GN=pks3 OS=Dictyostelium discoideum (Slime mold) PE=3 SV=1	PREDICTED: fatty acid synthase-like [Nasonia vitripennis]
c97997.graph_c0	0.00144842	-3.99318	down	--	Molecular Function: transferase activity, transferring phosphorus-containing groups (GO:0016772);;	K06640|0|nvi:100117810|serine/threonine-protein kinase atr; K06640 serine/threonine-protein kinase ATR [EC:2.7.11.1] (A)	--	PREDICTED: serine/threonine-protein kinase atr isoform X1 [Nasonia vitripennis]
c97978.graph_c0	0.000114725	1.81469	up	--	--	--	--	--
c97954.graph_c0	0.00296955	1.46243	up	--	--	--	--	--
c97953.graph_c0	0.00340063	-2.16476	down	--	Cellular Component: nucleus (GO:0005634);; Molecular Function: sequence-specific DNA binding (GO:0043565);; Molecular Function: protein heterodimerization activity (GO:0046982);; Biological Process: cell division (GO:0051301);;	--	--	PREDICTED: cell division cycle-associated protein 7-like [Nasonia vitripennis]
c97946.graph_c0	8.18385e-11	-3.13781	down	--	Molecular Function: sequence-specific DNA binding (GO:0043565);;	K09312|3.24898e-55|nvi:100116315|Cad; caudal; K09312 homeobox protein CDX (A)	Homeotic protein caudal GN=cad OS=Drosophila melanogaster (Fruit fly) PE=1 SV=4	caudal [Nasonia vitripennis]
c97945.graph_c0	1.29455e-19	7.28051	up	--	Cellular Component: chromosome (GO:0005694);;	--	--	PREDICTED: histone H1.0-like [Nasonia vitripennis]
c97926.graph_c0	0.00353189	Inf	up	--	--	--	--	--
c97903.graph_c0	0.000275176	-2.09226	down	--	Cellular Component: cell cortex (GO:0005938);; Molecular Function: Rho GTPase binding (GO:0017048);; Biological Process: regulation of Rho protein signal transduction (GO:0035023);;	--	CDC42 small effector protein homolog GN=Spec2 OS=Drosophila melanogaster (Fruit fly) PE=1 SV=2	PREDICTED: CDC42 small effector protein homolog [Nasonia vitripennis]
c97894.graph_c0	0.00155958	-2.91569	down	--	Molecular Function: transferase activity, transferring phosphorus-containing groups (GO:0016772);;	--	--	PREDICTED: uncharacterized protein DDB_G0287625-like [Nasonia vitripennis]
c97877.graph_c0	2.94526e-15	-7.98742	down	General function prediction only	--	--	Alpha-latrocrustotoxin-Lt1a (Precursor; Fragment) OS=Latrodectus tredecimguttatus (Mediterranean black widow spider) PE=2 SV=2	PREDICTED: ankyrin-1-like [Nasonia vitripennis]
c97834.graph_c2	0.000929073	1.99404	up	--	--	--	--	--
c97834.graph_c1	6.48403e-05	2.02503	up	--	--	--	--	--
c97808.graph_c1	9.74105e-08	-2.81747	down	--	--	K11291|1.35586e-95|nvi:100121842|protein HGV2; K11291 nuclear autoantigenic sperm protein (A)	Protein HGV2 GN=HGV2 OS=Halocynthia roretzi (Sea squirt) PE=2 SV=1	PREDICTED: protein HGV2 [Nasonia vitripennis]
c97807.graph_c0	4.87009e-05	-2.29492	down	--	--	--	Lachesin (Precursor) GN=LAC OS=Schistocerca americana (American grasshopper) PE=1 SV=1	PREDICTED: lachesin [Nasonia vitripennis]
c97784.graph_c0	7.13217e-12	-8.2116	down	--	--	--	--	endonuclease-like venom protein precursor [Nasonia vitripennis]
c97765.graph_c0	0.000533097	-1.78458	down	--	--	K15143|1.34493e-93|nvi:100122530|mediator of RNA polymerase II transcription subunit 30-like; K15143 mediator of RNA polymerase II transcription subunit 30 (A)	Mediator of RNA polymerase II transcription subunit 30 GN=MED30 OS=Aedes aegypti (Yellowfever mosquito) PE=3 SV=1	PREDICTED: mediator of RNA polymerase II transcription subunit 30-like [Nasonia vitripennis]
c97758.graph_c0	9.25435e-24	-10.2694	down	--	Molecular Function: magnesium ion binding (GO:0000287);; Molecular Function: isocitrate dehydrogenase (NAD+) activity (GO:0004449);; Biological Process: tricarboxylic acid cycle (GO:0006099);; Molecular Function: NAD binding (GO:0051287);;	K00030|1.61374e-167|nvi:100114279|isocitrate dehydrogenase [NAD] subunit gamma, mitochondrial-like; K00030 isocitrate dehydrogenase (NAD+) [EC:1.1.1.41] (A)	Isocitrate dehydrogenase [NAD] regulatory subunit B, mitochondrial (Precursor) GN=idhB OS=Dictyostelium discoideum (Slime mold) PE=3 SV=1	PREDICTED: isocitrate dehydrogenase [NAD] subunit gamma, mitochondrial-like [Nasonia vitripennis]
c97736.graph_c0	0.00615449	-2.31469	down	--	--	--	--	PREDICTED: protein DPCD [Nasonia vitripennis]
c97724.graph_c0	6.18461e-05	-2.96632	down	--	--	--	--	--
c97714.graph_c0	0.000433072	1.74179	up	--	--	--	--	--
c97709.graph_c0	0.000618608	1.80193	up	--	--	--	--	--
c97646.graph_c0	0.00107014	4.15433	up	--	--	K02263|2.3598e-83|nvi:100121926|cytochrome c oxidase subunit 4 isoform 1, mitochondrial-like; K02263 cytochrome c oxidase subunit 4 (A)	--	PREDICTED: cytochrome c oxidase subunit 4 isoform 1, mitochondrial-like [Nasonia vitripennis]
c97642.graph_c0	1.66041e-06	-4.26237	down	--	--	--	--	PREDICTED: uncharacterized protein LOC100679639 isoform X1 [Nasonia vitripennis]
c97618.graph_c0	5.85671e-16	-3.86204	down	--	--	--	Ejaculatory bulb-specific protein 3 (Precursor) GN=PebIII OS=Drosophila melanogaster (Fruit fly) PE=1 SV=2	PREDICTED: uncharacterized protein LOC100116643 [Nasonia vitripennis]
c97611.graph_c0	0.000445624	1.90902	up	--	Molecular Function: prostaglandin-D synthase activity (GO:0004667);; Molecular Function: transferase activity (GO:0016740);;	K01830|1.53014e-110|nvi:100120287|GstS4; glutathione S-transferase; K01830 prostaglandin-H2 D-isomerase [EC:5.3.99.2] (A)	Glutathione S-transferase OS=Musca domestica (House fly) PE=2 SV=1	PREDICTED: glutathione S-transferase [Nasonia vitripennis]
c97559.graph_c0	0.00174501	-1.55872	down	Posttranslational modification, protein turnover, chaperones	--	K10751|0|nvi:100120651|chromatin assembly factor 1 subunit B; K10751 chromatin assembly factor 1 subunit B (A)	Peroxiredoxin OS=Ascaris suum (Pig roundworm) PE=2 SV=1	PREDICTED: chromatin assembly factor 1 subunit B [Nasonia vitripennis]
c97509.graph_c0	0.00511257	-2.21361	down	--	Biological Process: DNA replication initiation (GO:0006270);;	K06628|0|nvi:100123768|cell division control protein 45 homolog; K06628 cell division control protein 45 (A)	Cell division control protein 45 homolog GN=cdc45 OS=Dictyostelium discoideum (Slime mold) PE=3 SV=1	PREDICTED: LOW QUALITY PROTEIN: cell division control protein 45 homolog [Nasonia vitripennis]
c97486.graph_c0	7.91552e-09	-7.30408	down	--	--	--	--	PREDICTED: CAX-interacting protein 4-like [Nasonia vitripennis]
c97478.graph_c0	2.27145e-11	-9.29327	down	Inorganic ion transport and metabolism	Biological Process: single-organism transport (GO:0044765);;	--	Putative transporter arsB GN=arsB OS=Dictyostelium discoideum (Slime mold) PE=2 SV=1	PREDICTED: P protein-like [Nasonia vitripennis]
c97469.graph_c0	0.00419483	-1.73477	down	Amino acid transport and metabolism	--	K01444|0|nvi:100119424|aspartylglucosaminidase (EC:3.5.1.26); K01444 N4-(beta-N-acetylglucosaminyl)-L-asparaginase [EC:3.5.1.26] (A)	Glycosylasparaginase beta chain (Fragment) OS=Spodoptera frugiperda (Fall armyworm) PE=1 SV=1	aspartylglucosaminidase precursor [Nasonia vitripennis]
c97414.graph_c0	0.00743614	-1.68622	down	Function unknown	Cellular Component: intracellular (GO:0005622);; Molecular Function: zinc ion binding (GO:0008270);;	--	Brain tumor protein GN=brat OS=Drosophila melanogaster (Fruit fly) PE=1 SV=2	PREDICTED: B-box type zinc finger protein ncl-1-like [Nasonia vitripennis]
c97404.graph_c0	0.000761345	-2.07792	down	--	--	--	--	PREDICTED: protein FAM122B [Nasonia vitripennis]
c97370.graph_c0	1.36334e-08	-4.46069	down	--	--	--	--	PREDICTED: uncharacterized protein LOC100678812 isoform X3 [Nasonia vitripennis]
c97357.graph_c0	1.08327e-58	-9.9819	down	--	--	--	--	--
c97288.graph_c1	0.00998212	2.95404	up	--	--	--	--	PREDICTED: uncharacterized protein LOC103315633 [Nasonia vitripennis]
c97258.graph_c0	0.000738559	3.93023	up	--	--	--	--	PREDICTED: uncharacterized protein LOC103316502 isoform X2 [Nasonia vitripennis]
c97255.graph_c0	0.00226985	-4.28259	down	--	--	--	--	PREDICTED: uncharacterized protein LOC100680001 [Nasonia vitripennis]
c97203.graph_c0	1.71718e-12	Inf	down	--	--	--	--	--
c97190.graph_c1	0.00261601	-2.29736	down	--	--	K11463|0|nvi:100121697|su(z)12; polycomb protein suz12-B; K11463 polycomb protein SUZ12 (A)	Polycomb protein Su(z)12 GN=Su(z)12 OS=Drosophila melanogaster (Fruit fly) PE=1 SV=1	PREDICTED: polycomb protein suz12-B isoform X1 [Nasonia vitripennis]
c97165.graph_c0	0.000208598	-7.63288	down	--	--	--	--	PREDICTED: uncharacterized transmembrane protein DDB_G0289901-like [Nasonia vitripennis]
c97155.graph_c0	0.00483146	-1.89847	down	Coenzyme transport and metabolism	Molecular Function: ATP binding (GO:0005524);; Biological Process: folic acid-containing compound biosynthetic process (GO:0009396);; Molecular Function: 5-formyltetrahydrofolate cyclo-ligase activity (GO:0030272);;	K01934|3.27863e-79|nvi:100679320|5-formyltetrahydrofolate cyclo-ligase; K01934 5-formyltetrahydrofolate cyclo-ligase [EC:6.3.3.2] (A)	Probable 5-formyltetrahydrofolate cyclo-ligase GN=Y106G6E.4 OS=Caenorhabditis elegans PE=3 SV=1	PREDICTED: 5-formyltetrahydrofolate cyclo-ligase [Nasonia vitripennis]
c97136.graph_c0	0.00031437	-2.92196	down	--	--	--	--	--
c97068.graph_c1	6.95746e-09	-3.85866	down	--	Molecular Function: metal ion binding (GO:0046872);;	--	--	PREDICTED: integrator complex subunit 12-like isoform X2 [Nasonia vitripennis]
c97053.graph_c0	0.00536896	-1.31811	down	Posttranslational modification, protein turnover, chaperones	Cellular Component: ubiquitin ligase complex (GO:0000151);; Biological Process: ubiquitin-dependent protein catabolic process (GO:0006511);; Biological Process: protein ubiquitination (GO:0016567);; Molecular Function: ubiquitin-ubiquitin ligase activity (GO:0034450);;	K10597|0|nvi:100118546|ubiquitin conjugation factor E4 B; K10597 ubiquitin conjugation factor E4 B [EC:6.3.2.19] (A)	Probable ubiquitin conjugation factor E4 {ECO:0000305} OS=Caenorhabditis elegans PE=3 SV=1	PREDICTED: ubiquitin conjugation factor E4 B isoform X1 [Nasonia vitripennis]
c97050.graph_c0	2.62076e-11	-2.90799	down	Lipid transport and metabolism	Molecular Function: oxidoreductase activity (GO:0016491);; Biological Process: single-organism metabolic process (GO:0044710);;	K00507|4.64293e-176|nvi:100115114|acyl-CoA Delta(11) desaturase; K00507 stearoyl-CoA desaturase (delta-9 desaturase) [EC:1.14.19.1] (A)	Acyl-CoA Delta(11) desaturase OS=Choristoneura rosaceana (Oblique banded leafroller) PE=1 SV=1	PREDICTED: acyl-CoA Delta(11) desaturase [Nasonia vitripennis]
c97042.graph_c0	2.34357e-25	-6.31278	down	--	--	--	--	PREDICTED: alpha-tocopherol transfer protein-like [Nasonia vitripennis]
c97040.graph_c0	3.07265e-05	2.10182	up	--	--	--	Muscle M-line assembly protein unc-89 GN=unc-89 OS=Caenorhabditis elegans PE=1 SV=3	PREDICTED: WAP, Kazal, immunoglobulin, Kunitz and NTR domain-containing protein 2 [Nasonia vitripennis]
c97028.graph_c0	9.83092e-05	-1.92195	down	--	--	K18730|6.50143e-69|nvi:100117390|PERQ amino acid-rich with GYF domain-containing protein CG11148-like; K18730 PERQ amino acid-rich with GYF domain-containing protein (A)	PERQ amino acid-rich with GYF domain-containing protein CG11148 GN=CG11148 OS=Drosophila melanogaster (Fruit fly) PE=1 SV=2	PREDICTED: PERQ amino acid-rich with GYF domain-containing protein CG11148-like isoform X3 [Nasonia vitripennis]
c97008.graph_c0	0.0090531	-1.89788	down	--	Molecular Function: monooxygenase activity (GO:0004497);; Molecular Function: iron ion binding (GO:0005506);; Molecular Function: electron carrier activity (GO:0009055);; Molecular Function: oxidoreductase activity, acting on paired donors, with incorporation or reduction of molecular oxygen (GO:0016705);; Molecular Function: heme binding (GO:0020037);; Biological Process: oxidation-reduction pro…	K15001|3.4211e-81|nvi:100123538|CYP4AV5; cytochrome P450 4C1; K15001 cytochrome P450, family 4 [EC:1.14.-.-] (A)	Cytochrome P450 4c3 GN=Cyp4c3 OS=Drosophila melanogaster (Fruit fly) PE=2 SV=1	PREDICTED: cytochrome P450 4C1 isoform X3 [Nasonia vitripennis]
c97006.graph_c0	0.00870497	-1.45457	down	--	Cellular Component: nuclear pore (GO:0005643);; Biological Process: transport (GO:0006810);;	K14309|0|nvi:100123536|nuclear pore complex protein Nup93-like; K14309 nuclear pore complex protein Nup93 (A)	--	PREDICTED: nuclear pore complex protein Nup93-like [Nasonia vitripennis]
c96989.graph_c0	0.00175341	-1.73316	down	--	--	K14303|0|ame:725332|GB19342; nuclear pore complex protein Nup160 homolog; K14303 nuclear pore complex protein Nup160 (A)	Nuclear pore complex protein Nup160 homolog GN=Nup160 OS=Drosophila melanogaster (Fruit fly) PE=1 SV=1	PREDICTED: nuclear pore complex protein Nup160 homolog [Harpegnathos saltator]
c96984.graph_c0	4.97826e-23	-8.73823	down	--	--	--	Akirin OS=Drosophila melanogaster (Fruit fly) PE=1 SV=1	PREDICTED: akirin-like [Megachile rotundata]
c96978.graph_c0	0.00797308	-1.41694	down	--	--	--	--	PREDICTED: uncharacterized protein LOC100679097 [Nasonia vitripennis]
c96916.graph_c0	0.000535282	-1.75344	down	Intracellular trafficking, secretion, and vesicular transport	Molecular Function: protein serine/threonine kinase activity (GO:0004674);; Molecular Function: ATP binding (GO:0005524);; Cellular Component: nuclear pore (GO:0005643);; Biological Process: protein phosphorylation (GO:0006468);; Biological Process: nucleocytoplasmic transport (GO:0006913);; Molecular Function: structural constituent of nuclear pore (GO:0017056);;	K14312|0|nvi:100121515|nuclear pore complex protein Nup155; K14312 nuclear pore complex protein Nup155 (A)	--	PREDICTED: nuclear pore complex protein Nup155 isoform X1 [Nasonia vitripennis]
c96912.graph_c0	3.38779e-06	5.09382	up	--	--	--	--	--
c96880.graph_c0	1.33316e-25	-8.89719	down	RNA processing and modification	Molecular Function: RNA binding (GO:0003723);; Molecular Function: polynucleotide adenylyltransferase activity (GO:0004652);; Cellular Component: nucleus (GO:0005634);; Biological Process: RNA polyadenylation (GO:0043631);;	K14376|0|nvi:100119065|poly(A) polymerase alpha; K14376 poly(A) polymerase [EC:2.7.7.19] (A)	Poly(A) polymerase GN=papA OS=Dictyostelium discoideum (Slime mold) PE=3 SV=1	PREDICTED: poly(A) polymerase type 3 isoform X1 [Nasonia vitripennis]
c96876.graph_c0	0.00495902	-2.19936	down	--	Molecular Function: chitin deacetylase activity (GO:0004099);; Cellular Component: extracellular region (GO:0005576);; Biological Process: carbohydrate metabolic process (GO:0005975);; Biological Process: chitin metabolic process (GO:0006030);; Molecular Function: chitin binding (GO:0008061);;	--	--	PREDICTED: uncharacterized protein LOC100120933 [Nasonia vitripennis]
c96872.graph_c0	0.00564173	-1.57502	down	--	--	--	--	PREDICTED: uncharacterized protein LOC100117670 [Nasonia vitripennis]
c96869.graph_c0	2.90652e-08	2.81557	up	--	Biological Process: mesoderm development (GO:0007498);; Biological Process: myofibril assembly (GO:0030239);;	--	Paramyosin, short form GN=Prm OS=Drosophila melanogaster (Fruit fly) PE=2 SV=2	PREDICTED: paramyosin, short form-like [Nasonia vitripennis]
c96858.graph_c0	0.00764326	-1.39955	down	General function prediction only	--	K00670|0|ame:411163|GB18226; n-alpha-acetyltransferase 15, NatA auxiliary subunit-like; K00670 peptide alpha-N-acetyltransferase [EC:2.3.1.88] (A)	--	PREDICTED: n-alpha-acetyltransferase 15, NatA auxiliary subunit-like [Bombus terrestris]
c96854.graph_c0	0.00708252	1.3452	up	--	--	--	--	--
c96808.graph_c0	3.52344e-15	Inf	up	--	--	--	--	PREDICTED: serine/arginine repetitive matrix protein 5-like isoform X1 [Nasonia vitripennis]
c96790.graph_c1	0.00736497	-3.22341	down	--	--	--	--	PREDICTED: acidic endochitinase SP2-like [Nasonia vitripennis]
c96788.graph_c1	0.00213483	-2.163	down	--	Biological Process: transport (GO:0006810);; Cellular Component: membrane (GO:0016020);;	K15108|0|nvi:100120062|mitochondrial thiamine pyrophosphate carrier; K15108 solute carrier family 25 (mitochondrial thiamine pyrophosphate transporter), member 19 (A)	Mitochondrial substrate carrier family protein B GN=mcfB OS=Dictyostelium discoideum (Slime mold) PE=3 SV=1	PREDICTED: mitochondrial thiamine pyrophosphate carrier [Nasonia vitripennis]
c96767.graph_c0	0.00693014	3.01131	up	--	--	--	--	--
c96757.graph_c0	1.40277e-11	-8.18333	down	--	--	--	--	PREDICTED: uncharacterized protein LOC100680265 [Nasonia vitripennis]
c96718.graph_c0	0.00888258	-1.94376	down	--	--	--	--	PREDICTED: heterogeneous nuclear ribonucleoprotein U-like protein 1 [Nasonia vitripennis]
c96708.graph_c0	4.6368e-05	-2.099	down	--	Molecular Function: hydrolase activity (GO:0016787);;	--	Mite allergen Der p 3 (Precursor) GN=DERP3 OS=Dermatophagoides pteronyssinus (European house dust mite) PE=1 SV=1	serine protease 43 precursor [Nasonia vitripennis]
c96699.graph_c0	4.95172e-33	-9.64724	down	General function prediction only	--	--	Ankyrin repeat, PH and SEC7 domain containing protein secG GN=secG OS=Dictyostelium discoideum (Slime mold) PE=2 SV=1	PREDICTED: serine/threonine-protein phosphatase 6 regulatory ankyrin repeat subunit B-like [Nasonia vitripennis]
c96692.graph_c0	0.00891604	-1.56056	down	--	Molecular Function: zinc ion binding (GO:0008270);;	K11319|8.0122e-18|nvi:100121544|inhibitor of growth protein 3-like; K11319 inhibitor of growth protein 3 (A)	--	PREDICTED: inhibitor of growth protein 3-like isoform X2 [Nasonia vitripennis]
c96681.graph_c0	9.3618e-07	Inf	down	--	--	--	--	--
c96678.graph_c0	1.79498e-11	9.22205	up	--	--	--	--	--
c96669.graph_c0	0.00275258	2.19657	up	--	--	--	--	--
c96642.graph_c0	0.00495902	-3.11935	down	--	--	--	--	--
c96624.graph_c0	0.000274209	1.70704	up	--	--	--	--	--
c96617.graph_c0	1.24274e-05	-2.18439	down	Amino acid transport and metabolism	Molecular Function: carboxypeptidase activity (GO:0004180);; Molecular Function: metallopeptidase activity (GO:0008237);; Molecular Function: metal ion binding (GO:0046872);;	--	Zinc carboxypeptidase A 1 (Precursor) GN=AGAP009593 OS=Anopheles gambiae (African malaria mosquito) PE=2 SV=3	PREDICTED: zinc carboxypeptidase-like [Nasonia vitripennis]
c96595.graph_c0	2.75637e-06	6.22496	up	--	--	--	--	PREDICTED: neurofilament medium polypeptide-like [Nasonia vitripennis]
c96594.graph_c0	6.30375e-15	Inf	down	--	--	--	--	venom protein I-like protein precursor [Nasonia vitripennis]
c96567.graph_c2	0.000249164	-2.68107	down	--	--	--	--	PREDICTED: probable GPI-anchored adhesin-like protein PGA55 isoform X1 [Nasonia vitripennis]
c96561.graph_c0	0.00384422	-2.59091	down	--	--	--	--	PREDICTED: uncharacterized protein LOC100679152 [Nasonia vitripennis]
c96556.graph_c3	0.00401898	-1.32903	down	--	--	--	--	--
c96556.graph_c2	7.71287e-06	-2.07591	down	--	Molecular Function: organic cyclic compound binding (GO:0097159);; Molecular Function: heterocyclic compound binding (GO:1901363);;	--	Heterogeneous nuclear ribonucleoprotein 27C GN=Hrb27C OS=Drosophila melanogaster (Fruit fly) PE=1 SV=2	PREDICTED: LOW QUALITY PROTEIN: ras GTPase-activating protein-binding protein 1 [Nasonia vitripennis]
c96556.graph_c0	3.6837e-08	-2.65515	down	--	Molecular Function: nucleotide binding (GO:0000166);; Molecular Function: nucleic acid binding (GO:0003676);; Cellular Component: intracellular (GO:0005622);; Biological Process: transport (GO:0006810);;	--	--	PREDICTED: LOW QUALITY PROTEIN: ras GTPase-activating protein-binding protein 1 [Nasonia vitripennis]
c96546.graph_c0	3.00273e-15	4.11935	up	--	--	--	--	--
c96522.graph_c0	0.00525687	1.38167	up	--	--	--	--	PREDICTED: leucine-rich repeat LGI family member 3-like [Nasonia vitripennis]
c96436.graph_c0	0.00139347	2.84181	up	--	--	--	--	--
c96421.graph_c0	0.00844108	2.70971	up	--	--	--	Facilitated trehalose transporter Tret1 {ECO:0000303|PubMed:20035867} OS=Bombyx mori (Silk moth) PE=1 SV=1	PREDICTED: facilitated trehalose transporter Tret1-2 homolog [Nasonia vitripennis]
c96400.graph_c0	0.00305779	1.53948	up	--	--	--	--	--
c96374.graph_c0	0.00618386	1.40396	up	Amino acid transport and metabolism	Biological Process: proteolysis (GO:0006508);; Molecular Function: metalloexopeptidase activity (GO:0008235);; Molecular Function: dipeptidyl-peptidase activity (GO:0008239);; Molecular Function: dipeptidase activity (GO:0016805);;	K01273|0|nvi:100113490|dipeptidase 1-like; K01273 membrane dipeptidase [EC:3.4.13.19] (A)	--	PREDICTED: dipeptidase 1-like isoform X1 [Nasonia vitripennis]
c96373.graph_c0	0.000845676	-1.95298	down	--	--	--	Probable salivary secreted peptide (Precursor) OS=Bombus ignitus (Bumblebee) PE=2 SV=1	PREDICTED: probable salivary secreted peptide [Nasonia vitripennis]
c96369.graph_c0	3.50807e-09	6.6221	up	--	Molecular Function: nucleotide binding (GO:0000166);;	--	--	PREDICTED: vegetative cell wall protein gp1-like [Nasonia vitripennis]
c96350.graph_c0	0.000144505	-4.57018	down	--	Molecular Function: microtubule motor activity (GO:0003777);; Molecular Function: ATP binding (GO:0005524);; Cellular Component: kinesin complex (GO:0005871);; Cellular Component: microtubule (GO:0005874);; Biological Process: microtubule-based movement (GO:0007018);; Molecular Function: microtubule binding (GO:0008017);;	--	Protein claret segregational GN=ncd OS=Drosophila melanogaster (Fruit fly) PE=1 SV=1	PREDICTED: uncharacterized protein LOC103312429 [Tribolium castaneum]
c96330.graph_c0	0.00687199	1.47344	up	--	--	--	--	--
c96306.graph_c0	2.00454e-07	-3.74547	down	--	--	K08731|1.27787e-68|nvi:100124026|baculoviral IAP repeat-containing protein 5; K08731 baculoviral IAP repeat-containing protein 5 (A)	--	PREDICTED: baculoviral IAP repeat-containing protein 5 [Nasonia vitripennis]
c96299.graph_c0	0.0059825	-2.0685	down	Replication, recombination and repair	Molecular Function: RNA binding (GO:0003723);; Molecular Function: RNA-DNA hybrid ribonuclease activity (GO:0004523);; Biological Process: RNA metabolic process (GO:0016070);; Biological Process: nucleic acid phosphodiester bond hydrolysis (GO:0090305);;	K10743|0|nvi:100119796|ribonuclease H2 subunit A; K10743 ribonuclease H2 subunit A [EC:3.1.26.4] (A)	Ribonuclease H2 subunit A GN=CG13690 OS=Drosophila melanogaster (Fruit fly) PE=2 SV=1	PREDICTED: ribonuclease H2 subunit A [Nasonia vitripennis]
c96220.graph_c0	0.00860383	1.24451	up	--	--	--	--	--
c96194.graph_c0	4.85076e-05	-2.28721	down	--	--	K17576|0|nvi:100680261|protein phosphatase 1 regulatory subunit 37; K17576 protein phosphatase 1 regulatory subunit 37 (A)	Protein phosphatase 1 regulatory subunit 37 homolog GN=F28C1.3 OS=Caenorhabditis elegans PE=3 SV=5	PREDICTED: protein phosphatase 1 regulatory subunit 37 [Nasonia vitripennis]
c96192.graph_c0	4.23491e-14	Inf	down	--	Molecular Function: RNA polymerase II transcription cofactor activity (GO:0001104);; Biological Process: regulation of transcription from RNA polymerase II promoter (GO:0006357);; Cellular Component: mediator complex (GO:0016592);;	K15135|5.05343e-94|api:100169192|mediator of RNA polymerase II transcription subunit 18; K15135 mediator of RNA polymerase II transcription subunit 18 (A)	Mediator of RNA polymerase II transcription subunit 18 GN=MED18 OS=Aedes aegypti (Yellowfever mosquito) PE=3 SV=1	PREDICTED: mediator of RNA polymerase II transcription subunit 18 [Microplitis demolitor]
c96185.graph_c0	0.00419968	-1.56513	down	--	Molecular Function: metal ion binding (GO:0046872);;	K08883|0|nvi:100121684|E3 ubiquitin-protein ligase TRIM33; K08883 tripartite motif-containing protein 33 [EC:6.3.2.19] (A)	B-box type zinc finger protein ncl-1 GN=ncl-1 OS=Caenorhabditis elegans PE=1 SV=1	PREDICTED: E3 ubiquitin-protein ligase TRIM33 [Nasonia vitripennis]
c96135.graph_c0	0.00118296	1.56145	up	--	--	--	--	hypothetical protein EAG_02866 [Camponotus floridanus]
c96131.graph_c0	0.00384422	-2.17777	down	Replication, recombination and repair	Molecular Function: DNA binding (GO:0003677);; Molecular Function: ATP binding (GO:0005524);; Biological Process: DNA replication (GO:0006260);; Molecular Function: nucleoside-triphosphatase activity (GO:0017111);;	K10755|0|nvi:100123962|replication factor C subunit 2; K10755 replication factor C subunit 2/4 (A)	Replication factor C subunit 2 GN=RfC4 OS=Drosophila melanogaster (Fruit fly) PE=2 SV=1	PREDICTED: replication factor C subunit 2 [Nasonia vitripennis]
c96092.graph_c0	0.00423615	1.99789	up	--	--	--	--	PREDICTED: uncharacterized protein LOC100678204 [Nasonia vitripennis]
c96044.graph_c0	0.000415404	-2.73334	down	--	--	--	--	--
c96039.graph_c0	1.93145e-10	-8.78382	down	--	--	--	Protein twisted gastrulation (Precursor) GN=tsg OS=Drosophila melanogaster (Fruit fly) PE=1 SV=1	PREDICTED: protein twisted gastrulation-like [Nasonia vitripennis]
c96033.graph_c1	4.441e-14	-8.48226	down	--	--	--	--	--
c96012.graph_c0	5.26874e-08	Inf	down	--	Biological Process: metabolic process (GO:0008152);; Molecular Function: transferase activity (GO:0016740);;	K00665|4.93922e-38|nvi:100122099|fatty acid synthase-like; K00665 fatty acid synthase, animal type [EC:2.3.1.85] (A)	--	PREDICTED: fatty acid synthase-like [Bombus impatiens]
c95960.graph_c0	5.84975e-08	-3.50427	down	--	Molecular Function: cysteine-type peptidase activity (GO:0008234);;	--	Caspase subunit p12 (Precursor) GN=Ice OS=Drosophila melanogaster (Fruit fly) PE=1 SV=2	PREDICTED: caspase-1-like isoform X2 [Nasonia vitripennis]
c95935.graph_c0	0.000463048	4.09492	up	--	--	--	--	PREDICTED: uncharacterized protein LOC100123663 isoform X3 [Nasonia vitripennis]
c95888.graph_c0	0.00326367	3.33301	up	--	--	--	--	PREDICTED: uncharacterized protein LOC100679554 isoform X1 [Nasonia vitripennis]
c95781.graph_c0	7.60658e-05	-2.54454	down	Translation, ribosomal structure and biogenesis	Cellular Component: dense fibrillar component (GO:0001651);; Molecular Function: mRNA binding (GO:0003729);; Cellular Component: small nucleolar ribonucleoprotein complex (GO:0005732);; Biological Process: rRNA processing (GO:0006364);; Biological Process: tRNA processing (GO:0008033);; Molecular Function: methyltransferase activity (GO:0008168);; Cellular Component: Cajal body (GO:0015030);; Cel…	K14563|1.60688e-166|ame:551992|Fib, GB13284; rRNA 2'-O-methyltransferase fibrillarin; K14563 rRNA 2'-O-methyltransferase fibrillarin [EC:2.1.1.-] (A)	rRNA 2&apos;-O-methyltransferase fibrillarin OS=Drosophila melanogaster (Fruit fly) PE=2 SV=1	PREDICTED: rRNA 2&apos;-O-methyltransferase fibrillarin-like [Bombus terrestris]
c95780.graph_c0	0.0062641	3.64091	up	--	Biological Process: metabolic process (GO:0008152);;	K11147|3.92335e-89|aga:AgaP_AGAP007475|AGAP007475-PA; K11147 dehydrogenase/reductase SDR family member 4 [EC:1.1.-.-] (A)	Dehydrogenase/reductase SDR family member 4 {ECO:0000250|UniProtKB:Q9BTZ2} OS=Caenorhabditis elegans PE=1 SV=1	Dehydrogenase/reductase SDR family member [Cerapachys biroi]
c95777.graph_c0	1.70605e-05	-4.94728	down	--	--	--	--	--
c95770.graph_c0	2.08495e-23	-10.3868	down	--	Molecular Function: catalytic activity (GO:0003824);;	--	Mite allergen Der f 3 (Precursor) GN=DERF3 OS=Dermatophagoides farinae (American house dust mite) PE=1 SV=2	PREDICTED: trypsin-3 [Nasonia vitripennis]
c95767.graph_c0	0.00404481	-1.55414	down	--	Cellular Component: ubiquitin ligase complex (GO:0000151);; Molecular Function: ubiquitin-protein transferase activity (GO:0004842);; Biological Process: protein ubiquitination (GO:0016567);;	K10599|0|ame:408750|Prp19, GB11480; pre-mRNA-processing factor 19; K10599 pre-mRNA-processing factor 19 [EC:6.3.2.19] (A)	Pre-mRNA-processing factor 19 {ECO:0000305} GN=prp-19 OS=Caenorhabditis elegans PE=3 SV=2	PREDICTED: pre-mRNA-processing factor 19 [Acromyrmex echinatior]
c95765.graph_c0	0.000753222	1.70296	up	--	--	--	--	--
c95711.graph_c2	0.00106826	1.59748	up	--	--	--	--	--
c95671.graph_c0	1.97988e-08	4.53271	up	--	Cellular Component: chromosome (GO:0005694);;	--	--	PREDICTED: histone H5-like [Nasonia vitripennis]
c95638.graph_c0	0.000857241	3.85485	up	--	--	--	Cilia- and flagella-associated protein 20 GN=CFAP20 OS=Drosophila melanogaster (Fruit fly) PE=1 SV=1	PREDICTED: uncharacterized protein LOC100678382 [Nasonia vitripennis]
c95636.graph_c0	7.02837e-10	-7.88311	down	--	--	--	--	PREDICTED: F-box/LRR-repeat protein 3-like isoform X1 [Nasonia vitripennis]
c95613.graph_c0	0.00968787	3.1663	up	--	--	--	--	--
c95592.graph_c0	0.00038687	4.43336	up	--	--	--	--	PREDICTED: tetratricopeptide repeat protein 25-like [Nasonia vitripennis]
c95582.graph_c0	0.000138164	-1.99413	down	--	--	--	Protein lethal(2)essential for life GN=l(2)efl OS=Drosophila melanogaster (Fruit fly) PE=1 SV=1	PREDICTED: protein lethal(2)essential for life-like [Nasonia vitripennis]
c95554.graph_c0	0.00098772	-2.32682	down	--	--	--	--	--
c95507.graph_c0	0.00110163	1.56985	up	--	--	--	--	--
c95479.graph_c0	3.40139e-05	2.80642	up	--	--	--	--	PREDICTED: hypothetical protein LOC100644221 [Bombus terrestris]
c95476.graph_c0	6.23448e-06	-2.12411	down	--	--	--	--	PREDICTED: nucleolar and coiled-body phosphoprotein 1 isoform X2 [Nasonia vitripennis]
c95416.graph_c0	4.1978e-06	5.43638	up	Amino acid transport and metabolism	Molecular Function: arginine kinase activity (GO:0004054);; Molecular Function: ATP binding (GO:0005524);; Biological Process: phosphorylation (GO:0016310);;	--	Arginine kinase GN=ARGK OS=Artemia franciscana (Brine shrimp) PE=2 SV=1	PREDICTED: LOW QUALITY PROTEIN: arginine kinase [Nasonia vitripennis]
c95302.graph_c0	4.01018e-07	5.83483	up	--	--	--	--	PREDICTED: uncharacterized protein LOC100121809 [Nasonia vitripennis]
c95260.graph_c0	0.00210865	2.90497	up	--	--	--	--	PREDICTED: uncharacterized protein LOC100678162 [Nasonia vitripennis]
c95218.graph_c0	0.00299482	-1.48501	down	General function prediction only	--	K15026|0|nvi:100120837|Eif2a; eukaryotic translation initiation factor 2A, 65kDa; K15026 translation initiation factor 2A (A)	Eukaryotic translation initiation factor 2A GN=CG7414 OS=Drosophila melanogaster (Fruit fly) PE=1 SV=1	PREDICTED: LOW QUALITY PROTEIN: eukaryotic translation initiation factor 2A isoform X1 [Nasonia vitripennis]
c95164.graph_c0	1.65508e-05	Inf	down	--	--	--	--	--
c95138.graph_c0	4.83703e-09	-5.39996	down	--	--	--	--	PREDICTED: uncharacterized protein LOC103317726 [Nasonia vitripennis]
c95133.graph_c0	4.60255e-14	8.6228	up	--	--	--	--	--
c95108.graph_c0	3.4526e-10	-5.32231	down	--	--	--	Protein phosphatase 1 regulatory subunit pprA GN=pprA OS=Dictyostelium discoideum (Slime mold) PE=3 SV=1	PREDICTED: leucine-rich repeat-containing protein 32-like [Nasonia vitripennis]
c95063.graph_c0	0.00453803	1.38341	up	--	Molecular Function: transferase activity, transferring phosphorus-containing groups (GO:0016772);;	--	--	PREDICTED: uncharacterized protein LOC100122199 [Nasonia vitripennis]
c95040.graph_c0	0.00878078	-1.53162	down	--	--	--	--	PREDICTED: uncharacterized protein LOC100115498 [Nasonia vitripennis]
c95000.graph_c1	1.13205e-05	-3.69516	down	--	--	K10739|7.24789e-99|nvi:100119335|RPA2; replication protein A2; K10739 replication factor A2 (A)	--	replication protein A2 [Nasonia vitripennis]
c95000.graph_c0	0.000156868	-3.99404	down	--	--	K10739|3.98199e-11|nvi:100119335|RPA2; replication protein A2; K10739 replication factor A2 (A)	--	replication protein A2 [Nasonia vitripennis]
c94986.graph_c0	0.00618705	1.46831	up	--	--	--	--	--
c94968.graph_c0	2.41399e-12	-8.25457	down	--	--	--	--	--
c94951.graph_c0	0.000929073	4.23157	up	--	--	--	--	--
c94946.graph_c0	0.00787331	1.95529	up	--	--	--	--	--
c94935.graph_c0	0.000434912	-1.88479	down	--	Molecular Function: protein phosphatase inhibitor activity (GO:0004864);; Cellular Component: cytoplasm (GO:0005737);; Biological Process: regulation of phosphorylation (GO:0042325);;	K17555|3.43851e-48|ame:552560|GB10473; protein phosphatase 1 regulatory subunit 14B-like; K17555 protein phosphatase 1 regulatory subunit 14B (A)	--	PREDICTED: protein phosphatase 1 regulatory subunit 14B-like isoform 1 [Bombus terrestris]
c94897.graph_c0	4.16303e-06	-3.25607	down	Nucleotide transport and metabolism	--	--	--	PREDICTED: uncharacterized protein LOC100113687 isoform X2 [Nasonia vitripennis]
c94798.graph_c0	0.00493638	-3.07217	down	--	Molecular Function: binding (GO:0005488);;	--	--	PREDICTED: putative mediator of RNA polymerase II transcription subunit 12 isoform X2 [Nasonia vitripennis]
c94792.graph_c0	9.70738e-28	-10.1257	down	--	--	--	--	--
c94769.graph_c0	0.000253293	-1.78388	down	--	Molecular Function: serine-type peptidase activity (GO:0008236);;	--	Proclotting enzyme heavy chain (Precursor) OS=Tachypleus tridentatus (Japanese horseshoe crab) PE=1 SV=1	serine protease 67 precursor [Nasonia vitripennis]
c94695.graph_c0	9.02045e-06	-2.60128	down	--	Molecular Function: carboxypeptidase activity (GO:0004180);;	K09646|0|nvi:100121833|retinoid-inducible serine carboxypeptidase-like; K09646 serine carboxypeptidase 1 [EC:3.4.16.-] (A)	Venom serine carboxypeptidase (Precursor) OS=Apis mellifera (Honeybee) PE=2 SV=1	PREDICTED: retinoid-inducible serine carboxypeptidase-like [Nasonia vitripennis]
c94672.graph_c0	6.41851e-10	-7.02282	down	--	--	--	--	--
c94611.graph_c0	0.00634381	2.97649	up	--	--	--	--	PREDICTED: uncharacterized protein LOC100678394 [Nasonia vitripennis]
c94610.graph_c0	1.2318e-07	-5.37843	down	--	--	--	--	hypothetical protein SINV_09710 [Solenopsis invicta]
c94601.graph_c0	0.00390411	-2.03321	down	Replication, recombination and repair	--	K02328|0|nvi:100121407|DNA polymerase delta small subunit-like; K02328 DNA polymerase delta subunit 2 (A)	DNA polymerase delta small subunit GN=CG12018 OS=Drosophila melanogaster (Fruit fly) PE=2 SV=1	PREDICTED: DNA polymerase delta small subunit-like [Nasonia vitripennis]
c94489.graph_c0	0.000617828	-6.72498	down	--	--	--	--	--
c94479.graph_c0	0.00584629	2.96338	up	--	--	--	--	PREDICTED: hydrocephalus-inducing protein homolog [Nasonia vitripennis]
c94396.graph_c0	0.00483146	-3.14899	down	--	--	--	--	PREDICTED: microtubule-associated protein futsch isoform X2 [Nasonia vitripennis]
c94391.graph_c0	0.000321356	4.50654	up	Posttranslational modification, protein turnover, chaperones	Molecular Function: ATP binding (GO:0005524);; Molecular Function: nucleoside-triphosphatase activity (GO:0017111);;	--	Katanin p60 ATPase-containing subunit A1 {ECO:0000255|HAMAP-Rule:MF_03023} OS=Strongylocentrotus purpuratus (Purple sea urchin) PE=1 SV=1	PREDICTED: katanin p60 ATPase-containing subunit A-like 2 isoform X2 [Nasonia vitripennis]
c94305.graph_c0	3.53295e-12	-8.81971	down	--	--	--	--	--
c94286.graph_c0	9.14495e-11	-2.91289	down	--	Molecular Function: peptidase activity (GO:0008233);;	--	Trypsin-1 OS=Astacus astacus (Noble crayfish) PE=1 SV=1	PREDICTED: mite allergen Der f 3-like [Nasonia vitripennis]
c94280.graph_c0	0.00116729	1.77794	up	--	Molecular Function: neurotransmitter transporter activity (GO:0005326);; Cellular Component: membrane (GO:0016020);; Biological Process: synaptic vesicle exocytosis (GO:0016079);; Molecular Function: syntaxin binding (GO:0019905);; Cellular Component: terminal bouton (GO:0043195);; Biological Process: regulation of neurotransmitter secretion (GO:0046928);; Biological Process: synaptic growth at n…	K15294|1.17014e-17|api:100166185|Cpx; complexin; K15294 complexin-1/2 (A)	Complexin (Precursor) GN=cpx OS=Drosophila melanogaster (Fruit fly) PE=2 SV=1	PREDICTED: complexin isoform X1 [Acromyrmex echinatior]
c94272.graph_c0	1.29182e-07	Inf	down	--	--	--	--	PREDICTED: uncharacterized protein LOC100678638 [Nasonia vitripennis]
c94255.graph_c0	0.00118557	-2.5358	down	--	--	--	--	--
c94250.graph_c0	0.0071591	-1.5019	down	Function unknown	Molecular Function: magnesium ion binding (GO:0000287);; Biological Process: tRNA modification (GO:0006400);; Molecular Function: tRNA guanylyltransferase activity (GO:0008193);;	K10761|0|nvi:100117826|probable tRNA(His) guanylyltransferase; K10761 tRNA(His) guanylyltransferase [EC:2.7.7.79] (A)	Probable tRNA(His) guanylyltransferase GN=l(2)35Bc OS=Drosophila melanogaster (Fruit fly) PE=2 SV=1	PREDICTED: probable tRNA(His) guanylyltransferase [Nasonia vitripennis]
c94236.graph_c0	3.95464e-05	2.02688	up	--	--	--	--	--
c94219.graph_c0	0.00812426	-1.4972	down	--	Biological Process: protein methylation (GO:0006479);; Molecular Function: methyltransferase activity (GO:0008168);; Biological Process: pathogenesis (GO:0009405);;	K05931|0|ame:411458|GB18129; histone-arginine methyltransferase CARMER-like; K05931 histone-arginine methyltransferase CARM1 [EC:2.1.1.125] (A)	Histone-arginine methyltransferase CARMER {ECO:0000250|UniProtKB:Q7Q2B7} OS=Aedes aegypti (Yellowfever mosquito) PE=3 SV=1	PREDICTED: histone-arginine methyltransferase CARMER-like isoform X1 [Apis dorsata]
c94166.graph_c0	0.00297259	1.96959	up	--	--	--	--	--
c94131.graph_c0	0.00400558	1.57893	up	--	--	--	--	PREDICTED: uncharacterized protein LOC103512826 [Diaphorina citri]
c94123.graph_c0	0.000538321	-6.9276	down	--	--	--	--	PREDICTED: uncharacterized protein LOC100116826 [Nasonia vitripennis]
c94001.graph_c0	0.00849357	-2.87922	down	--	Biological Process: metabolic process (GO:0008152);; Molecular Function: transferase activity (GO:0016740);;	K00665|1.01143e-44|nvi:100122083|fatty acid synthase-like; K00665 fatty acid synthase, animal type [EC:2.3.1.85] (A)	--	PREDICTED: fatty acid synthase-like [Nasonia vitripennis]
c93962.graph_c0	0.00719902	1.64643	up	--	--	--	--	--
c93892.graph_c0	0.000197011	2.82557	up	--	--	--	--	--
c93886.graph_c0	1.11702e-26	-6.95091	down	--	Biological Process: metabolic process (GO:0008152);; Molecular Function: transferase activity (GO:0016740);;	K00665|1.67104e-52|nvi:100122083|fatty acid synthase-like; K00665 fatty acid synthase, animal type [EC:2.3.1.85] (A)	--	PREDICTED: fatty acid synthase-like [Nasonia vitripennis]
c93875.graph_c0	0.00584629	-2.79281	down	--	--	--	--	--
c93874.graph_c0	5.59683e-06	Inf	up	--	--	--	--	--
c93843.graph_c0	0.00751975	1.55299	up	--	--	--	--	PREDICTED: uncharacterized protein DDB_G0284459-like [Nasonia vitripennis]
c93733.graph_c0	8.65014e-08	-4.59257	down	--	--	--	--	PREDICTED: trithorax group protein osa-like [Nasonia vitripennis]
c93638.graph_c0	0.00258797	1.40041	up	--	--	--	--	PREDICTED: uncharacterized protein LOC100677876 isoform X1 [Nasonia vitripennis]
c93552.graph_c0	6.37867e-07	-2.94066	down	--	--	--	--	nabaecin-1 precursor [Nasonia vitripennis]
c93525.graph_c0	0.00217354	1.79619	up	--	--	--	--	--
c93517.graph_c0	0.00572296	-1.3585	down	General function prediction only	--	K04727|0|nvi:100119729|apoptosis-inducing factor 1, mitochondrial; K04727 programmed cell death 8 (apoptosis-inducing factor) [EC:1.-.-.-] (A)	Putative apoptosis-inducing factor 1, mitochondrial (Precursor) GN=AIF OS=Drosophila melanogaster (Fruit fly) PE=2 SV=2	PREDICTED: apoptosis-inducing factor 1, mitochondrial isoform X2 [Nasonia vitripennis]
c93507.graph_c0	8.60691e-07	Inf	down	--	--	--	--	--
c93506.graph_c0	0.0044781	-2.64132	down	--	--	--	--	--
c93503.graph_c0	6.28442e-05	1.87662	up	--	--	--	--	--
c93477.graph_c0	0.00871675	1.30106	up	--	--	--	--	--
c93435.graph_c0	4.56713e-07	-3.37282	down	--	--	--	--	PREDICTED: uncharacterized protein LOC100113539 [Nasonia vitripennis]
c93377.graph_c0	0.000137715	-1.82519	down	--	--	--	--	PREDICTED: embryogenic cell protein 40-like [Nasonia vitripennis]
c93369.graph_c0	2.7542e-37	9.57522	up	--	--	--	--	PREDICTED: uncharacterized protein DDB_G0283697-like [Nasonia vitripennis]
c93274.graph_c0	2.01916e-10	-3.75739	down	Chromatin structure and dynamics	Cellular Component: nucleosome (GO:0000786);; Molecular Function: DNA binding (GO:0003677);; Cellular Component: nucleus (GO:0005634);; Biological Process: nucleosome assembly (GO:0006334);; Molecular Function: protein heterodimerization activity (GO:0046982);;	K11251|1.2684e-69|nvi:100118117|histone H2A-like; K11251 histone H2A (A)	Histone H2A GN=His2A OS=Tigriopus californicus (Marine copepod) PE=3 SV=2	PREDICTED: histone H2A-like [Nasonia vitripennis]
c93251.graph_c0	0.00224767	-2.13789	down	--	--	--	Protein lethal(2)essential for life GN=l(2)efl OS=Drosophila melanogaster (Fruit fly) PE=1 SV=1	PREDICTED: protein lethal(2)essential for life-like [Nasonia vitripennis]
c93198.graph_c1	0.00294495	-1.70674	down	--	--	--	--	PREDICTED: uncharacterized protein LOC100122828 isoform X1 [Nasonia vitripennis]
c93198.graph_c0	0.000761345	-1.99764	down	--	--	--	--	PREDICTED: uncharacterized protein LOC100122828 isoform X1 [Nasonia vitripennis]
c93150.graph_c0	1.59048e-10	-5.03586	down	--	--	--	--	hypothetical protein X777_16110 [Cerapachys biroi]
c93125.graph_c0	3.15469e-06	-4.84061	down	--	--	--	--	--
c93108.graph_c0	0.000175633	-2.22116	down	--	--	--	RFX-like transcription factor daf-19 GN=daf-19 OS=Caenorhabditis elegans PE=2 SV=3	PREDICTED: DNA-binding protein RFX7 [Nasonia vitripennis]
c93046.graph_c0	1.83248e-45	-9.25774	down	--	--	--	--	--
c93027.graph_c0	8.26652e-05	-2.49796	down	--	Molecular Function: zinc ion binding (GO:0008270);;	K11319|1.99872e-147|ame:100578127|Ing3; inhibitor of growth family, member 3; K11319 inhibitor of growth protein 3 (A)	--	PREDICTED: inhibitor of growth protein 3-like isoform X2 [Nasonia vitripennis]
c92946.graph_c0	2.1684e-10	-7.91126	down	--	--	--	--	--
c92902.graph_c0	9.11887e-09	-3.12141	down	--	--	--	--	PREDICTED: pheromone-binding protein Gp-9 [Nasonia vitripennis]
c92867.graph_c0	0.00251556	2.03857	up	--	--	--	--	--
c92849.graph_c0	0.000126896	-1.79518	down	--	Molecular Function: peptidase activity (GO:0008233);;	--	Lectizyme (Precursor) GN=Gpl OS=Glossina austeni (Savannah tsetse fly) PE=2 SV=1	serine protease 52 precursor [Nasonia vitripennis]
c92810.graph_c0	1.37946e-09	-5.37953	down	--	Molecular Function: zinc ion binding (GO:0008270);; Biological Process: biosynthetic process (GO:0009058);; Molecular Function: oxidoreductase activity (GO:0016491);; Molecular Function: transferase activity, transferring acyl groups other than amino-acyl groups (GO:0016747);; Molecular Function: hydrolase activity, acting on ester bonds (GO:0016788);; Biological Process: oxidation-reduction proc…	K00665|2.04414e-48|nvi:100122083|fatty acid synthase-like; K00665 fatty acid synthase, animal type [EC:2.3.1.85] (A)	--	PREDICTED: fatty acid synthase-like [Nasonia vitripennis]
c92783.graph_c0	0.000633475	-2.03406	down	--	--	--	Homeobox protein 9 GN=hbx9 OS=Dictyostelium discoideum (Slime mold) PE=3 SV=1	TGIF-like [Nasonia vitripennis]
c92769.graph_c0	5.02518e-05	1.86877	up	--	--	--	--	PREDICTED: glutamic acid-rich protein-like isoform X2 [Nasonia vitripennis]
c92752.graph_c0	9.23106e-09	-2.49902	down	--	--	--	Probable salivary secreted peptide (Precursor) OS=Bombus ignitus (Bumblebee) PE=2 SV=1	PREDICTED: probable salivary secreted peptide [Nasonia vitripennis]
c92692.graph_c0	0.00132068	-3.57607	down	--	--	--	--	--
c92670.graph_c0	0.00370204	1.82404	up	--	--	--	--	PREDICTED: somatomedin-B and thrombospondin type-1 domain-containing protein-like [Nasonia vitripennis]
c92637.graph_c0	3.74867e-15	-7.83044	down	--	--	--	--	venom protein L precursor [Nasonia vitripennis]
c92600.graph_c0	0.00208315	-1.80877	down	--	Molecular Function: protein serine/threonine kinase activity (GO:0004674);; Molecular Function: ATP binding (GO:0005524);; Biological Process: protein phosphorylation (GO:0006468);;	K04688|5.48387e-162|nvi:100123253|ribosomal protein S6 kinase beta-1-like; K04688 p70 ribosomal S6 kinase [EC:2.7.11.1] (A)	Putative ribosomal protein S6 kinase alpha-1 GN=rskn-1 OS=Caenorhabditis elegans PE=3 SV=4	PREDICTED: ribosomal protein S6 kinase beta-1-like [Megachile rotundata]
c92596.graph_c0	1.59715e-43	9.05155	up	--	--	--	--	--
c92544.graph_c0	6.91523e-05	2.0776	up	--	--	--	--	--
c92423.graph_c0	0.000454724	-3.59812	down	--	--	--	--	--
c92386.graph_c0	2.04386e-09	-3.12572	down	--	--	K18622|0|nvi:100120196|protein hu-li tai shao; K18622 adducin (A)	--	PREDICTED: uncharacterized protein PF11_0213 isoform X1 [Nasonia vitripennis]
c92379.graph_c0	8.22978e-05	-3.97592	down	--	--	--	--	--
c92317.graph_c1	0.000535282	-1.60734	down	--	Molecular Function: protein serine/threonine kinase activity (GO:0004674);; Molecular Function: ATP binding (GO:0005524);; Biological Process: protein phosphorylation (GO:0006468);;	K08960|0|ame:412108|GB15520; uncharacterized LOC412108; K08960 casein kinase 1, epsilon [EC:2.7.11.1] (A)	Discs overgrown protein kinase GN=dco OS=Drosophila melanogaster (Fruit fly) PE=1 SV=2	PREDICTED: casein kinase 1 epsilon isoform X2 [Nasonia vitripennis]
c92308.graph_c0	0.00301675	1.7357	up	--	--	--	--	--
c92216.graph_c0	1.79211e-10	9.99137	up	--	--	--	--	PREDICTED: activating signal cointegrator 1 complex subunit 2 homolog [Nasonia vitripennis]
c92153.graph_c0	2.16368e-09	Inf	up	--	--	--	--	--
c92105.graph_c0	0.00339263	1.79864	up	--	--	--	--	--
c92000.graph_c0	8.27734e-05	-3.33236	down	Carbohydrate transport and metabolism	Molecular Function: alpha-1,4-glucosidase activity (GO:0004558);; Biological Process: carbohydrate metabolic process (GO:0005975);; Molecular Function: cation binding (GO:0043169);;	K01187|3.12986e-161|nvi:100120914|maltase 1-like; K01187 alpha-glucosidase [EC:3.2.1.20] (A)	Maltase 2 (Precursor) GN=Mal-B2 OS=Drosophila virilis (Fruit fly) PE=3 SV=2	PREDICTED: maltase 1-like [Nasonia vitripennis]
c91975.graph_c0	0.00407843	-3.12902	down	--	--	--	--	--
c91961.graph_c0	0.0051547	-1.40462	down	--	Molecular Function: nucleic acid binding (GO:0003676);; Cellular Component: nuclear pore (GO:0005643);; Biological Process: protein import into nucleus (GO:0006606);;	K09291|0|nvi:100679291|nucleoprotein TPR; K09291 nucleoprotein TPR (A)	Nucleoprotein TPR GN=Mtor OS=Drosophila melanogaster (Fruit fly) PE=1 SV=1	PREDICTED: nucleoprotein TPR [Nasonia vitripennis]
c91837.graph_c0	2.84415e-05	-3.41499	down	--	--	--	--	--
c91764.graph_c0	5.49933e-05	-4.62172	down	--	--	K15001|1.11229e-31|nvi:100117687|CYP4AB9; cytochrome P450 4AB9; K15001 cytochrome P450, family 4 [EC:1.14.-.-] (A)	Cytochrome P450 4c3 GN=Cyp4c3 OS=Drosophila melanogaster (Fruit fly) PE=2 SV=1	cytochrome P450 4AB9 precursor [Nasonia vitripennis]
c91708.graph_c0	0.000625648	2.24557	up	--	--	--	--	--
c91591.graph_c0	0.0053414	-1.56488	down	General function prediction only	--	K14837|2.8836e-89|nvi:100115183|nucleolin-like; K14837 nucleolar protein 12 (A)	Polyadenylate-binding protein 2 GN=pabpn1 OS=Dictyostelium discoideum (Slime mold) PE=3 SV=1	PREDICTED: nucleolin-like [Nasonia vitripennis]
c91558.graph_c0	0.00542408	1.50263	up	--	Cellular Component: integral component of membrane (GO:0016021);;	--	--	PREDICTED: transmembrane protein 35 [Nasonia vitripennis]
c91551.graph_c1	0.00352092	-3.26325	down	--	--	--	--	--
c91489.graph_c0	6.15705e-06	-3.84587	down	--	--	K08059|1.13459e-62|nvi:100117923|gamma-interferon-inducible-lysosomal thiol reductase-like; K08059 interferon, gamma-inducible protein 30 (A)	GILT-like protein C02D5.2 GN=C02D5.2 OS=Caenorhabditis elegans PE=3 SV=1	PREDICTED: gamma-interferon-inducible-lysosomal thiol reductase-like [Nasonia vitripennis]
c91468.graph_c1	0.00429466	-3.15262	down	--	--	--	--	--
c91468.graph_c0	0.000302114	-1.74956	down	--	--	--	Peroxisome biogenesis factor 2 GN=pex2 OS=Dictyostelium discoideum (Slime mold) PE=3 SV=1	PREDICTED: peroxisome biogenesis factor 2 [Nasonia vitripennis]
c91435.graph_c0	0.000149224	4.97418	up	--	--	--	--	PREDICTED: uncharacterized protein LOC103317413 [Nasonia vitripennis]
c91432.graph_c0	1.12721e-20	9.01863	up	--	--	--	--	PREDICTED: uncharacterized protein LOC100117710 [Nasonia vitripennis]
c91413.graph_c0	0.00413236	3.44039	up	--	--	--	--	--
c91303.graph_c0	0.00577389	-2.7572	down	--	--	--	--	--
c91253.graph_c0	7.45165e-08	-2.77181	down	RNA processing and modification	Biological Process: nuclear-transcribed mRNA poly(A) tail shortening (GO:0000289);; Molecular Function: protein binding (GO:0005515);; Cellular Component: cytoplasm (GO:0005737);; Biological Process: regulation of transcription from RNA polymerase II promoter (GO:0006357);; Cellular Component: CCR4-NOT complex (GO:0030014);; Biological Process: oogenesis (GO:0048477);;	K12603|0|nvi:100122037|CCR4-NOT transcription complex subunit 6-like; K12603 CCR4-NOT transcription complex subunit 6 [EC:3.1.13.4] (A)	Protein angel GN=angel OS=Drosophila melanogaster (Fruit fly) PE=1 SV=2	PREDICTED: CCR4-NOT transcription complex subunit 6-like isoform X1 [Nasonia vitripennis]
c91217.graph_c0	0.00400776	1.79451	up	--	--	--	--	--
c91207.graph_c0	0.00466485	1.50057	up	--	--	--	--	--
c91141.graph_c0	0.000144141	-4.43678	down	--	--	--	--	--
c91130.graph_c0	0.00156714	-2.67814	down	--	--	--	--	PREDICTED: uncharacterized protein LOC100679700 [Nasonia vitripennis]
c91106.graph_c0	0.000271873	-2.401	down	--	--	--	--	--
c91089.graph_c0	0.00198627	-8.64944	down	--	--	K15001|9.01102e-30|nvi:100117647|cytochrome P450 4C1-like; K15001 cytochrome P450, family 4 [EC:1.14.-.-] (A)	--	PREDICTED: cytochrome P450 4C1-like isoform X1 [Nasonia vitripennis]
c90977.graph_c0	1.9778e-10	-9.95193	down	General function prediction only	Molecular Function: binding (GO:0005488);;	--	Chorion transcription factor Cf2 GN=Cf2 OS=Drosophila melanogaster (Fruit fly) PE=2 SV=3	PREDICTED: zinc finger protein 271-like [Nasonia vitripennis]
c90942.graph_c1	0.000774874	1.78359	up	--	--	--	Uncharacterized protein C32D5.6 GN=C32D5.6 OS=Caenorhabditis elegans PE=4 SV=1	PREDICTED: tetratricopeptide repeat protein 39C-like [Nasonia vitripennis]
c90852.graph_c0	0.00038543	3.72274	up	--	--	--	--	--
c90828.graph_c0	1.79419e-13	-6.50737	down	--	--	--	--	PREDICTED: acidic endochitinase SP2-like [Nasonia vitripennis]
c90715.graph_c0	0.0062344	-2.13054	down	--	Cellular Component: membrane (GO:0016020);;	K05463|4.91591e-170|nvi:100119767|ephrin-B2; K05463 ephrin-B (A)	Ephrin-4 (Precursor) GN=efn-4 OS=Caenorhabditis elegans PE=2 SV=2	PREDICTED: ephrin-B2 [Nasonia vitripennis]
c90632.graph_c0	1.04163e-12	-5.17792	down	--	--	--	--	--
c90573.graph_c0	2.17878e-06	Inf	down	--	--	K10878|1.88969e-34|nvi:100114622|Spo11, mei-W68; meiotic recombination protein SPO11; K10878 meiotic recombination protein SPO11 (A)	--	PREDICTED: meiotic recombination protein SPO11 isoform X3 [Nasonia vitripennis]
c90528.graph_c0	0.00981383	1.66021	up	--	--	--	--	PREDICTED: uncharacterized protein LOC100679349 [Nasonia vitripennis]
c90527.graph_c0	0.000422374	-3.81629	down	--	--	--	--	--
c90488.graph_c0	0.00320247	-2.06314	down	--	Molecular Function: hydrolase activity (GO:0016787);;	--	Lectizyme (Precursor) GN=Gpl OS=Glossina fuscipes fuscipes (Riverine tsetse fly) PE=2 SV=1	serine protease 102 precursor [Nasonia vitripennis]
c90404.graph_c0	5.35582e-11	-9.78611	down	--	--	--	--	--
c90403.graph_c0	0.00550569	1.65917	up	--	--	--	--	--
c90360.graph_c0	0.00442371	2.12836	up	--	--	--	--	PREDICTED: uncharacterized protein LOC100678896 [Nasonia vitripennis]
c90353.graph_c0	0.00627686	1.70949	up	--	--	--	--	PREDICTED: LOW QUALITY PROTEIN: tetratricopeptide repeat protein 39C-like, partial [Bombus terrestris]
c90344.graph_c0	0.00238508	-3.01208	down	--	--	K02089|8.41054e-18|nvi:100122192|Cdk4; cyclin-dependent kinase 4 (EC:2.7.11.22); K02089 cyclin-dependent kinase 4 [EC:2.7.11.22] (A)	--	cyclin-dependent kinase 4 [Nasonia vitripennis]
c90326.graph_c0	3.00934e-05	Inf	up	--	--	--	--	PREDICTED: uncharacterized protein LOC103317937 [Nasonia vitripennis]
c89908.graph_c0	2.52625e-10	-9.02838	down	--	--	--	--	PREDICTED: pacifastin-like protease inhibitor cvp4 [Nasonia vitripennis]
c89897.graph_c0	0.000131493	-4.87239	down	--	Molecular Function: protein serine/threonine kinase activity (GO:0004674);; Molecular Function: ATP binding (GO:0005524);; Biological Process: protein phosphorylation (GO:0006468);; Biological Process: cell division (GO:0051301);;	K02087|0|nvi:100116857|Cdk1, cdc2; cyclin dependent kinase 1; K02087 cyclin-dependent kinase 1 [EC:2.7.11.22 2.7.11.23] (A)	Cyclin-dependent kinase 1 GN=cdc2 OS=Drosophila melanogaster (Fruit fly) PE=1 SV=1	cyclin dependent kinase 1 [Nasonia vitripennis]
c89815.graph_c0	6.77804e-05	-2.12001	down	--	--	--	--	--
c89812.graph_c1	0.0062312	-2.2249	down	General function prediction only	--	K14411|6.06379e-143|ame:409961|GB14789; heterogeneous nuclear ribonucleoprotein 27C-like; K14411 RNA-binding protein Musashi (A)	Heterogeneous nuclear ribonucleoprotein 27C GN=Hrb27C OS=Drosophila melanogaster (Fruit fly) PE=1 SV=2	PREDICTED: heterogeneous nuclear ribonucleoprotein 27C isoform X2 [Harpegnathos saltator]
c89800.graph_c0	2.46405e-07	Inf	down	--	--	--	--	--
c89798.graph_c0	0.00642501	-1.26194	down	--	--	--	--	PREDICTED: uncharacterized protein LOC100122183 [Nasonia vitripennis]
c89767.graph_c0	0.00186273	3.57308	up	--	Molecular Function: sequence-specific DNA binding transcription factor activity (GO:0003700);; Cellular Component: nucleus (GO:0005634);; Biological Process: regulation of transcription, DNA-templated (GO:0006355);; Molecular Function: sequence-specific DNA binding (GO:0043565);;	--	Aristaless homeobox protein (Fragment) GN=ALX OS=Strongylocentrotus purpuratus (Purple sea urchin) PE=2 SV=2	PREDICTED: homeobox protein aristaless-like 4-like isoform 2 [Bombus impatiens]
c89624.graph_c0	0.00597886	-1.82034	down	--	Biological Process: response to stress (GO:0006950);;	--	Protein lethal(2)essential for life GN=l(2)efl OS=Drosophila melanogaster (Fruit fly) PE=1 SV=1	PREDICTED: protein lethal(2)essential for life-like [Nasonia vitripennis]
c89609.graph_c0	4.01628e-06	6.13858	up	--	--	--	--	--
c89605.graph_c0	0.000850633	1.65579	up	--	--	--	--	--
c89581.graph_c0	1.2356e-17	-4.49027	down	--	Biological Process: cell cycle (GO:0007049);; Molecular Function: kinase activity (GO:0016301);; Biological Process: phosphorylation (GO:0016310);; Molecular Function: cyclin-dependent protein serine/threonine kinase regulator activity (GO:0016538);;	K02219|8.54506e-48|nvi:100118646|cyclin-dependent kinases regulatory subunit; K02219 cyclin-dependent kinase regulatory subunit CKS1 (A)	Probable cyclin-dependent kinases regulatory subunit OS=Physarum polycephalum (Slime mold) PE=1 SV=1	PREDICTED: cyclin-dependent kinases regulatory subunit [Nasonia vitripennis]
c89519.graph_c0	8.88201e-08	-2.37112	down	--	--	--	--	--
c89491.graph_c0	0.0014712	1.64153	up	General function prediction only	Biological Process: intracellular signal transduction (GO:0035556);;	--	Transient receptor potential channel pyrexia GN=pyx OS=Drosophila melanogaster (Fruit fly) PE=2 SV=2	PREDICTED: ankyrin-3-like isoform X1 [Nasonia vitripennis]
c89445.graph_c1	3.99936e-06	Inf	down	--	--	--	--	nabaecin-2 precursor [Nasonia vitripennis]
c89270.graph_c1	5.98722e-05	-4.61304	down	--	Cellular Component: nucleosome (GO:0000786);; Molecular Function: DNA binding (GO:0003677);; Cellular Component: nucleus (GO:0005634);; Biological Process: nucleosome assembly (GO:0006334);;	K11275|5.50904e-13|nvi:100118153|histone H1-like; K11275 histone H1/5 (A)	Histone H1A OS=Chironomus tentans (Midge) PE=3 SV=1	PREDICTED: histone H1-like [Nasonia vitripennis]
c89200.graph_c0	1.15409e-40	11.2724	up	--	--	--	--	--
c89122.graph_c0	0.000126896	-2.43726	down	--	--	--	--	defensin 2-2a precursor [Nasonia vitripennis]
c89057.graph_c0	0.00286194	-1.59374	down	Carbohydrate transport and metabolism	Biological Process: metabolic process (GO:0008152);; Molecular Function: hydrolase activity, acting on glycosyl bonds (GO:0016798);;	K01194|0|nvi:100124127|trehalase-like; K01194 alpha,alpha-trehalase [EC:3.2.1.28] (A)	Trehalase (Precursor) GN=tre1 OS=Pimpla hypochondriaca (Parasitoid wasp) PE=1 SV=1	PREDICTED: LOW QUALITY PROTEIN: trehalase-like [Nasonia vitripennis]
c89032.graph_c0	3.57183e-07	-4.46664	down	--	Molecular Function: protein serine/threonine kinase activity (GO:0004674);; Molecular Function: ATP binding (GO:0005524);; Biological Process: protein phosphorylation (GO:0006468);;	K11481|0|nvi:100119785|aurora kinase C-like; K11481 aurora kinase A [EC:2.7.11.1] (A)	Aurora kinase {ECO:0000312|EMBL:BAJ10384.1} OS=Patiria pectinifera (Starfish) PE=1 SV=1	PREDICTED: aurora kinase C-like [Nasonia vitripennis]
c88998.graph_c0	1.4244e-12	-6.47416	down	--	Molecular Function: nucleic acid binding (GO:0003676);; Molecular Function: catalytic activity (GO:0003824);;	--	SWI/SNF-related matrix-associated actin-dependent regulator of chromatin subfamily A containing DEAD/H box 1 homolog GN=Etl1 OS=Drosophila melanogaster (Fruit fly) PE=1 SV=1	PREDICTED: lymphocyte-specific helicase-like [Nasonia vitripennis]
c88631.graph_c0	0.00187611	-2.81214	down	--	--	--	--	--
c88543.graph_c0	7.27223e-16	Inf	down	--	--	--	--	PREDICTED: uncharacterized protein LOC100679212 [Nasonia vitripennis]
c88266.graph_c0	0.00014882	Inf	down	--	--	--	--	PREDICTED: uncharacterized protein LOC100678638 [Nasonia vitripennis]
c88126.graph_c0	1.50981e-08	Inf	down	--	--	--	--	PREDICTED: uncharacterized protein LOC101240540 [Hydra vulgaris]
c87953.graph_c0	1.93402e-07	Inf	down	--	--	--	--	--
c87578.graph_c1	0.00215277	-2.4858	down	Transcription	Molecular Function: sequence-specific DNA binding transcription factor activity (GO:0003700);; Cellular Component: nucleus (GO:0005634);; Biological Process: regulation of transcription, DNA-templated (GO:0006355);; Molecular Function: sequence-specific DNA binding (GO:0043565);;	--	Fork head domain transcription factor slp1 GN=slp1 OS=Drosophila melanogaster (Fruit fly) PE=2 SV=1	PREDICTED: GATA zinc finger domain-containing protein 12-like [Microplitis demolitor]
c87567.graph_c0	0.00221817	-3.43852	down	--	--	--	--	PREDICTED: flocculation protein FLO11-like [Nasonia vitripennis]
c87550.graph_c1	0.00186273	3.57192	up	--	--	--	--	--
c87434.graph_c0	0.00197323	-3.39777	down	--	--	--	--	--
c87362.graph_c0	2.90527e-06	Inf	down	--	--	--	--	--
c87142.graph_c0	8.59839e-10	Inf	down	--	Molecular Function: catalytic activity (GO:0003824);;	--	Hypodermin-B (Precursor) OS=Hypoderma lineatum (Early cattle grub) PE=1 SV=1	serine protease precursor [Nasonia vitripennis]
c87009.graph_c0	0.000924714	4.32258	up	Energy production and conversion	Cellular Component: mitochondrial respiratory chain complex II (GO:0005749);; Cellular Component: microtubule associated complex (GO:0005875);; Biological Process: tricarboxylic acid cycle (GO:0006099);; Biological Process: mitochondrial electron transport, succinate to ubiquinone (GO:0006121);; Molecular Function: succinate dehydrogenase (ubiquinone) activity (GO:0008177);; Molecular Function: e…	--	Succinate dehydrogenase [ubiquinone] iron-sulfur subunit, mitochondrial (Precursor) GN=SdhB OS=Drosophila melanogaster (Fruit fly) PE=2 SV=2	Succinate dehydrogenase [ubiquinone] iron-sulfur subunit-like protein [Nasonia vitripennis]
c86959.graph_c1	0.00612551	3.23638	up	--	--	--	--	PREDICTED: F-box only protein 39-like isoform 1 [Megachile rotundata]
c86752.graph_c0	0.0029613	-3.08332	down	--	--	--	--	--
c86725.graph_c0	0.00702341	1.4254	up	--	--	--	--	PREDICTED: hemicentin-2-like [Nasonia vitripennis]
c86690.graph_c0	2.92168e-06	-5.1865	down	--	--	--	--	PREDICTED: cerebellar degeneration-related protein 2-like isoform X4 [Apis dorsata]
c86662.graph_c0	3.77634e-09	-4.74021	down	--	--	--	--	PREDICTED: uncharacterized protein LOC100679743 [Nasonia vitripennis]
c86570.graph_c0	1.48317e-15	-5.24088	down	--	Molecular Function: kinase activity (GO:0016301);; Biological Process: cellular metabolic process (GO:0044237);; Molecular Function: metal ion binding (GO:0046872);;	--	--	PREDICTED: uncharacterized protein LOC100122219 [Nasonia vitripennis]
c86435.graph_c1	0.00155621	2.53172	up	--	--	--	--	--
c86214.graph_c0	0.00338478	1.73499	up	--	--	--	--	--
c86183.graph_c0	1.25869e-08	Inf	up	--	Molecular Function: catalytic activity (GO:0003824);;	--	Chymotrypsin-1 OS=Solenopsis invicta (Red imported fire ant) PE=1 SV=1	serine protease 120 precursor [Nasonia vitripennis]
c86103.graph_c0	4.16838e-17	-4.5743	down	--	Biological Process: response to stress (GO:0006950);;	K09542|1.71095e-87|nvi:100118094|protein lethal(2)essential for life-like; K09542 crystallin, alpha B (A)	Protein lethal(2)essential for life GN=l(2)efl OS=Drosophila melanogaster (Fruit fly) PE=1 SV=1	PREDICTED: protein lethal(2)essential for life-like [Nasonia vitripennis]
c86094.graph_c0	1.31147e-18	-9.19819	down	--	--	--	--	--
c86065.graph_c0	3.0996e-05	2.02112	up	--	--	--	--	--
c86043.graph_c0	5.66487e-09	-4.22402	down	--	Molecular Function: RNA binding (GO:0003723);;	K18756|0|nvi:100121881|protein bicaudal C; K18756 protein bicaudal C (A)	Protein bicaudal C GN=BicC OS=Drosophila melanogaster (Fruit fly) PE=1 SV=2	PREDICTED: protein bicaudal C isoform X1 [Nasonia vitripennis]
c86039.graph_c1	0.000962439	-3.89404	down	--	--	--	--	--
c85979.graph_c2	2.7414e-22	Inf	down	--	--	--	--	--
c85930.graph_c0	0.000904929	-4.17667	down	--	--	--	--	PREDICTED: glycine-rich cell wall structural protein 1-like [Solenopsis invicta]
c85823.graph_c0	0.000238982	-4.21026	down	--	--	--	--	--
c85761.graph_c0	1.90711e-28	-9.54732	down	--	Molecular Function: peptidase activity (GO:0008233);;	--	Trypsin-1 OS=Astacus astacus (Noble crayfish) PE=1 SV=1	serine protease 48 precursor [Nasonia vitripennis]
c85750.graph_c1	2.78865e-06	6.85646	up	--	--	--	--	--
c85525.graph_c0	0.00409733	-1.97522	down	--	Molecular Function: nucleic acid binding (GO:0003676);; Molecular Function: metal ion binding (GO:0046872);;	--	Protein charlatan GN=chn OS=Drosophila melanogaster (Fruit fly) PE=2 SV=3	PREDICTED: protein charlatan-like isoform X2 [Apis mellifera]
c85439.graph_c0	0.00379782	2.05853	up	--	--	--	--	PREDICTED: uncharacterized protein LOC100679964 isoform X1 [Nasonia vitripennis]
c85387.graph_c0	0.00953391	-1.82392	down	--	--	--	--	--
c85375.graph_c0	0.00439594	-3.00858	down	Chromatin structure and dynamics	Cellular Component: nucleosome (GO:0000786);; Molecular Function: DNA binding (GO:0003677);; Cellular Component: nucleus (GO:0005634);; Biological Process: nucleosome assembly (GO:0006334);; Molecular Function: protein heterodimerization activity (GO:0046982);;	K11254|9.90586e-43|asn:102373634|histone H4 type VIII-like; K11254 histone H4 (A)	Histone H4 OS=Urechis caupo (Innkeeper worm) PE=3 SV=2	histone H4 [Hymenolepis microstoma]
c85271.graph_c0	0.00342225	-1.36954	down	--	Biological Process: lipid metabolic process (GO:0006629);; Molecular Function: hydrolase activity (GO:0016787);;	--	Uncharacterized protein C05D11.7 GN=C05D11.7 OS=Caenorhabditis elegans PE=3 SV=2	PREDICTED: patatin-like phospholipase domain-containing protein 2 isoform X1 [Nasonia vitripennis]
c85224.graph_c0	1.12564e-22	-9.03878	down	--	--	--	--	--
c84432.graph_c0	0.00311189	-7.28345	down	--	--	--	--	--
c84343.graph_c0	0.0090531	-1.3427	down	--	Cellular Component: nucleus (GO:0005634);; Biological Process: intracellular protein transport (GO:0006886);; Molecular Function: Ran GTPase binding (GO:0008536);;	K18460|0|nvi:100122978|exportin-7; K18460 exportin-7 (A)	Ran-binding protein 16 GN=Ranbp16 OS=Drosophila melanogaster (Fruit fly) PE=2 SV=1	PREDICTED: exportin-7 isoform X1 [Nasonia vitripennis]
c84184.graph_c0	0.000368283	-2.80977	down	--	--	K14972|2.86391e-158|nvi:100118595|PAX-interacting protein 1; K14972 PAX-interacting protein 1 (A)	--	PREDICTED: PAX-interacting protein 1 [Nasonia vitripennis]
c84140.graph_c0	0.00128491	-1.9354	down	--	Cellular Component: nucleus (GO:0005634);; Biological Process: regulation of transcription, DNA-templated (GO:0006355);;	K12580|0|nvi:100119332|CCR4-NOT transcription complex subunit 3-like; K12580 CCR4-NOT transcription complex subunit 3 (A)	--	PREDICTED: LOW QUALITY PROTEIN: CCR4-NOT transcription complex subunit 3-like [Nasonia vitripennis]
c83732.graph_c0	0.000220425	1.66224	up	--	--	--	--	--
c83345.graph_c0	6.93282e-05	-9.80146	down	--	Molecular Function: catalytic activity (GO:0003824);;	--	Trypsin (Precursor) OS=Phaedon cochleariae (Mustard beetle) PE=2 SV=1	PREDICTED: chymotrypsin-2 [Nasonia vitripennis]
c83332.graph_c0	0.000296001	-8.52819	down	--	--	--	--	--
c83123.graph_c0	0.00769613	1.63164	up	--	--	--	--	--
c83114.graph_c0	0.00214265	1.613	up	--	--	--	--	--
c83085.graph_c0	0.000389389	4.33118	up	--	--	--	--	--
c82983.graph_c1	0.00876036	-1.83447	down	--	--	--	Protein OPI10 homolog GN=AAEL010953 OS=Aedes aegypti (Yellowfever mosquito) PE=3 SV=1	PREDICTED: protein OPI10 homolog [Apis florea]
c82701.graph_c0	0.00691417	1.51634	up	--	--	--	--	--
c82667.graph_c0	1.21779e-10	-6.32215	down	--	--	--	--	PREDICTED: uncharacterized protein LOC100119572 [Nasonia vitripennis]
c82590.graph_c0	9.04825e-07	-4.12623	down	General function prediction only	Molecular Function: nucleic acid binding (GO:0003676);; Molecular Function: metal ion binding (GO:0046872);;	--	Adult enhancer factor 1 GN=Aef1 OS=Drosophila melanogaster (Fruit fly) PE=2 SV=1	PREDICTED: trithorax group protein osa-like [Nasonia vitripennis]
c82533.graph_c0	0.00152504	-3.23906	down	--	--	--	--	--
c82463.graph_c0	5.69025e-06	Inf	up	--	--	--	--	PREDICTED: uncharacterized protein LOC103316759 [Nasonia vitripennis]
c82413.graph_c0	0.00107271	1.65551	up	Function unknown	--	--	Peptidyl-alpha-hydroxyglycine alpha-amidating lyase 2 (Precursor) GN=Pal2 OS=Drosophila melanogaster (Fruit fly) PE=1 SV=2	PREDICTED: peptidyl-alpha-hydroxyglycine alpha-amidating lyase 2 [Nasonia vitripennis]
c82404.graph_c0	0.00812945	2.89261	up	--	--	--	--	--
c82337.graph_c0	0.00565276	-7.66567	down	--	Molecular Function: catalytic activity (GO:0003824);; Biological Process: metabolic process (GO:0008152);;	K00665|7.19863e-29|nvi:100122083|fatty acid synthase-like; K00665 fatty acid synthase, animal type [EC:2.3.1.85] (A)	--	PREDICTED: fatty acid synthase-like [Nasonia vitripennis]
c82238.graph_c0	0.00158294	-1.62314	down	--	Cellular Component: integral component of membrane (GO:0016021);;	--	--	PREDICTED: macoilin-1-like isoform X1 [Nasonia vitripennis]
c82225.graph_c0	1.09839e-22	Inf	down	--	--	--	--	PREDICTED: uncharacterized protein LOC100678937 [Nasonia vitripennis]
c82224.graph_c0	8.17761e-06	-3.11093	down	--	--	K18730|4.43622e-133|nvi:100117390|PERQ amino acid-rich with GYF domain-containing protein CG11148-like; K18730 PERQ amino acid-rich with GYF domain-containing protein (A)	PERQ amino acid-rich with GYF domain-containing protein CG11148 GN=CG11148 OS=Drosophila melanogaster (Fruit fly) PE=1 SV=2	PREDICTED: PERQ amino acid-rich with GYF domain-containing protein CG11148-like isoform X2 [Nasonia vitripennis]
c81823.graph_c0	0.000242216	2.16958	up	--	--	--	--	--
c81751.graph_c0	2.31626e-06	2.19116	up	--	--	--	--	--
c81669.graph_c0	0.000434912	-2.97166	down	--	--	--	--	--
c81336.graph_c0	2.10022e-07	Inf	up	--	--	--	--	--
c81306.graph_c0	0.00217766	3.35819	up	--	--	--	--	--
c81088.graph_c0	0.00377778	2.25297	up	--	Biological Process: defense response (GO:0006952);;	--	Defensin-1 (Precursor) OS=Apis mellifera (Honeybee) PE=1 SV=3	PREDICTED: defensin-1-like [Bombus impatiens]
c80955.graph_c0	0.000379519	-2.87769	down	--	Molecular Function: magnesium ion binding (GO:0000287);; Molecular Function: ribose phosphate diphosphokinase activity (GO:0004749);; Biological Process: ribonucleoside monophosphate biosynthetic process (GO:0009156);; Biological Process: nucleotide biosynthetic process (GO:0009165);; Molecular Function: kinase activity (GO:0016301);; Biological Process: phosphorylation (GO:0016310);;	K00948|0|nvi:100116255|ribose-phosphate pyrophosphokinase 1-like; K00948 ribose-phosphate pyrophosphokinase [EC:2.7.6.1] (A)	Ribose-phosphate pyrophosphokinase A GN=prsA OS=Dictyostelium discoideum (Slime mold) PE=1 SV=1	PREDICTED: ribose-phosphate pyrophosphokinase 1-like [Nasonia vitripennis]
c80920.graph_c0	4.25711e-06	-5.43195	down	--	--	--	--	--
c80763.graph_c0	0.00398951	-1.34304	down	Nucleotide transport and metabolism	Molecular Function: nucleoside diphosphate kinase activity (GO:0004550);; Molecular Function: ATP binding (GO:0005524);; Biological Process: nucleoside diphosphate phosphorylation (GO:0006165);; Biological Process: GTP biosynthetic process (GO:0006183);; Biological Process: UTP biosynthetic process (GO:0006228);; Biological Process: CTP biosynthetic process (GO:0006241);;	K00940|2.64403e-101|nvi:100680313|nucleoside diphosphate kinase; K00940 nucleoside-diphosphate kinase [EC:2.7.4.6] (A)	Nucleoside diphosphate kinase GN=awd OS=Drosophila melanogaster (Fruit fly) PE=1 SV=3	PREDICTED: nucleoside diphosphate kinase [Nasonia vitripennis]
c80752.graph_c1	2.3117e-05	-6.9275	down	General function prediction only	Molecular Function: translation elongation factor activity (GO:0003746);; Cellular Component: nucleolus (GO:0005730);; Biological Process: translational elongation (GO:0006414);;	--	Transcription elongation factor 1 homolog GN=Y54G11A.11 OS=Caenorhabditis elegans PE=3 SV=1	Transcription elongation factor 1-like protein [Cerapachys biroi]
c80749.graph_c0	0.00485823	-2.21895	down	Posttranslational modification, protein turnover, chaperones	--	--	Alpha-VTN protease chain 2 (Precursor) OS=Bombyx mori (Silk moth) PE=1 SV=1	PREDICTED: trypsin-7 [Nasonia vitripennis]
c80616.graph_c0	0.00343524	-1.51168	down	--	--	--	--	PREDICTED: race-specific elicitor A4-like [Nasonia vitripennis]
c80583.graph_c0	0.000452039	-2.88943	down	--	--	--	--	--
c80534.graph_c0	0.00723741	1.31723	up	Posttranslational modification, protein turnover, chaperones	--	K08770|3.1562e-11|dpe:Dper_GL20619|GL20619 gene product from transcript GL20619-RA; K08770 ubiquitin C (A)	Ubiquitin (Precursor; Fragment) OS=Strongylocentrotus purpuratus (Purple sea urchin) PE=2 SV=2	hypothetical protein CRE_04943 [Caenorhabditis remanei]
c80332.graph_c0	5.12971e-19	9.25119	up	--	--	--	--	--
c80289.graph_c0	5.9011e-07	-2.27184	down	--	Molecular Function: cysteine-type endopeptidase inhibitor activity (GO:0004869);; Biological Process: short-term memory (GO:0007614);; Biological Process: long-term memory (GO:0007616);;	--	Crustapain (Precursor) OS=Pandalus borealis (Northern red shrimp) PE=1 SV=1	PREDICTED: crustapain-like [Nasonia vitripennis]
c80244.graph_c0	3.78616e-14	-11.8879	down	--	--	--	Pupal cuticle protein C1B OS=Tenebrio molitor (Yellow mealworm beetle) PE=1 SV=1	PREDICTED: pupal cuticle protein C1B-like [Nasonia vitripennis]
c80218.graph_c0	0.0077178	1.3011	up	--	--	--	--	--
c79814.graph_c0	0.00234868	-1.92791	down	Lipid transport and metabolism	--	--	Esterase FE4 (Precursor) OS=Myzus persicae (Green peach aphid) PE=1 SV=1	carboxylesterase clade D, member 5 precursor [Nasonia vitripennis]
c79807.graph_c0	7.59909e-05	3.77336	up	Cytoskeleton	Molecular Function: GTPase activity (GO:0003924);; Molecular Function: structural constituent of cytoskeleton (GO:0005200);; Molecular Function: GTP binding (GO:0005525);; Cellular Component: cytoplasm (GO:0005737);; Cellular Component: microtubule (GO:0005874);; Biological Process: GTP catabolic process (GO:0006184);; Biological Process: microtubule-based process (GO:0007017);; Biological Proces…	K07375|0|nvi:100114292|tubulin beta-4 chain-like; K07375 tubulin beta (A)	Tubulin beta chain OS=Paracentrotus lividus (Common sea urchin) PE=2 SV=1	PREDICTED: tubulin beta-4 chain-like [Nasonia vitripennis]
c79776.graph_c0	0.000264428	1.68858	up	--	--	--	--	--
c74914.graph_c0	0.00819345	-3.39798	down	--	--	--	--	--
c74580.graph_c0	0.00139236	-3.59535	down	--	--	--	--	--
c71050.graph_c0	0.0030807	3.70377	up	--	--	--	--	--
c70163.graph_c0	0.00115554	9.07768	up	--	--	--	--	--
c70147.graph_c0	2.92168e-06	-4.23425	down	--	--	--	--	--
c70136.graph_c0	0.000228373	1.88459	up	--	--	--	--	--
c70114.graph_c0	0.00199211	1.53059	up	--	--	--	Fatty acid-binding protein, muscle OS=Locusta migratoria (Migratory locust) PE=1 SV=2	PREDICTED: fatty acid-binding protein, muscle isoform X1 [Nasonia vitripennis]
c70071.graph_c0	0.00566918	1.49675	up	--	--	--	--	--
c70033.graph_c0	0.00518226	-2.07054	down	--	Molecular Function: nucleic acid binding (GO:0003676);; Molecular Function: helicase activity (GO:0004386);; Molecular Function: ATP binding (GO:0005524);;	K14305|0|nvi:100124197|putative pre-mRNA-splicing factor ATP-dependent RNA helicase DHX15; K14305 nuclear pore complex protein Nup43 (A)	--	PREDICTED: putative pre-mRNA-splicing factor ATP-dependent RNA helicase DHX15 [Nasonia vitripennis]
c70029.graph_c0	7.27533e-12	Inf	down	--	--	--	--	PREDICTED: uncharacterized protein LOC100869231 [Apis florea]
c70002.graph_c0	6.22923e-11	-5.73407	down	Chromatin structure and dynamics	Cellular Component: nucleosome (GO:0000786);; Molecular Function: DNA binding (GO:0003677);; Cellular Component: nucleus (GO:0005634);; Cellular Component: lipid particle (GO:0005811);; Biological Process: nucleosome assembly (GO:0006334);; Molecular Function: protein heterodimerization activity (GO:0046982);; Biological Process: centrosome duplication (GO:0051298);;	K11251|2.34685e-71|nvi:100118117|histone H2A-like; K11251 histone H2A (A)	Histone H2A GN=His2A OS=Tigriopus californicus (Marine copepod) PE=3 SV=2	PREDICTED: histone H2A-like [Nasonia vitripennis]
c70001.graph_c0	0.00357378	-2.48954	down	--	--	--	--	--
c69979.graph_c0	0.0096501	1.41918	up	--	--	K11247|0|ame:408623|endoA, GB14809; endophilin A; K11247 endophilin-A (A)	Endophilin-A OS=Drosophila virilis (Fruit fly) PE=3 SV=1	PREDICTED: endophilin-A isoform X8 [Apis mellifera]
c69973.graph_c0	0.000425116	2.14627	up	--	--	--	--	--
c69960.graph_c0	1.61707e-05	-2.09871	down	--	Cellular Component: nucleus (GO:0005634);; Biological Process: intracellular protein transport (GO:0006886);; Molecular Function: Ran GTPase binding (GO:0008536);;	K18752|0|nvi:100122894|TNPO1; transportin-1; K18752 transportin-1 (A)	Transportin GN=tnpo OS=Dictyostelium discoideum (Slime mold) PE=3 SV=1	PREDICTED: transportin-1 [Nasonia vitripennis]
c69959.graph_c0	0.00196301	Inf	down	--	--	--	--	--
c69954.graph_c0	0.00878979	1.53702	up	--	--	--	--	--
c69924.graph_c0	0.00650394	1.4052	up	--	Biological Process: cellular process (GO:0009987);;	--	--	PREDICTED: major facilitator superfamily domain-containing protein 6 isoform X1 [Acromyrmex echinatior]
c69893.graph_c0	0.00812945	1.80592	up	--	--	--	Transmembrane and TPR repeat-containing protein CG4341 GN=CG4341 OS=Drosophila melanogaster (Fruit fly) PE=2 SV=1	PREDICTED: transmembrane and TPR repeat-containing protein 1-like [Bombus impatiens]
c69890.graph_c0	4.69237e-05	1.88957	up	--	--	--	--	--
c69877.graph_c0	1.22488e-21	-4.31253	down	--	--	--	--	--
c69871.graph_c0	9.61051e-20	-6.29935	down	--	--	--	--	--
c69864.graph_c0	0.00215103	-2.22935	down	--	--	--	--	PREDICTED: uncharacterized protein LOC100677809 isoform X3 [Nasonia vitripennis]
c69849.graph_c0	4.13582e-35	-11.1649	down	--	--	--	--	PREDICTED: thrombin inhibitor rhodniin-like [Nasonia vitripennis]
c69839.graph_c0	0.00704266	1.63969	up	--	--	K12076|0|ame:724292|GB14011; disks large 1 tumor suppressor protein-like; K12076 disks large protein 1 (A)	Disks large 1 tumor suppressor protein GN=dlg1 OS=Drosophila melanogaster (Fruit fly) PE=1 SV=2	PREDICTED: disks large 1 tumor suppressor protein-like [Megachile rotundata]
c69830.graph_c0	9.08793e-05	-3.41135	down	--	--	--	--	--
c69807.graph_c0	0.00172949	-3.09433	down	--	--	--	--	--
c69771.graph_c0	0.00388655	-2.2165	down	--	--	--	--	--
c69765.graph_c0	0.00121607	2.26574	up	--	--	--	--	--
c69760.graph_c0	2.71912e-08	-2.84077	down	--	--	--	--	--
c69077.graph_c0	4.58797e-12	-8.46331	down	--	--	--	Protease inhibitor SGPI-2 (Precursor) OS=Schistocerca gregaria (Desert locust) PE=1 SV=1	PREDICTED: pacifastin-like protease inhibitor cvp4 [Nasonia vitripennis]
c68882.graph_c0	3.99368e-07	Inf	up	--	--	--	--	PREDICTED: uncharacterized protein LOC103315671 [Nasonia vitripennis]
c68805.graph_c0	0.000990792	-5.78323	down	--	--	--	Histone H1 OS=Tigriopus californicus (Marine copepod) PE=3 SV=1	PREDICTED: histone H1C-like [Nasonia vitripennis]
c68218.graph_c0	9.29933e-08	Inf	up	--	--	--	--	--
c66714.graph_c0	1.52656e-27	-9.19269	down	--	--	--	--	--
c65949.graph_c0	5.64933e-09	-3.14892	down	--	--	--	--	PREDICTED: uncharacterized protein LOC100680008 [Nasonia vitripennis]
c65876.graph_c0	0.000750994	1.89309	up	--	--	--	--	--
c65118.graph_c0	0.000259361	3.97089	up	--	--	--	--	--
c64291.graph_c0	0.00744982	-1.55045	down	--	--	--	Probable salivary secreted peptide (Precursor) OS=Bombus ignitus (Bumblebee) PE=2 SV=1	PREDICTED: probable salivary secreted peptide [Nasonia vitripennis]
c63776.graph_c0	3.88518e-08	-3.04389	down	--	--	K18756|5.72797e-123|nvi:100121881|protein bicaudal C; K18756 protein bicaudal C (A)	Protein bicaudal C GN=BicC OS=Drosophila melanogaster (Fruit fly) PE=1 SV=2	PREDICTED: protein bicaudal C isoform X1 [Nasonia vitripennis]
c62854.graph_c0	2.91889e-15	-6.73567	down	--	--	--	--	PREDICTED: uncharacterized protein LOC100119111 isoform X1 [Nasonia vitripennis]
c57752.graph_c0	0.00137883	1.88166	up	--	--	--	--	--
c57719.graph_c0	0.00150572	-3.06496	down	Carbohydrate transport and metabolism	Biological Process: carbohydrate metabolic process (GO:0005975);; Molecular Function: maltose alpha-glucosidase activity (GO:0032450);; Molecular Function: cation binding (GO:0043169);;	--	Maltase 1 (Precursor) GN=Mal-B1 OS=Drosophila virilis (Fruit fly) PE=3 SV=2	PREDICTED: maltase 2 [Nasonia vitripennis]
c56076.graph_c0	0.00256762	1.70537	up	--	--	--	--	--
c55872.graph_c0	0.00855627	2.05316	up	--	--	--	--	--
c55472.graph_c0	0.00372582	-3.22991	down	--	--	K11364|4.44779e-126|nvi:100123994|SAGA-associated factor 29 homolog; K11364 SAGA-associated factor 29 (A)	--	PREDICTED: SAGA-associated factor 29 homolog [Nasonia vitripennis]
c55098.graph_c0	0.000711985	Inf	down	--	--	--	--	endonuclease-like venom protein precursor [Nasonia vitripennis]
c54654.graph_c0	0.00268861	-5.71907	down	--	Molecular Function: nucleic acid binding (GO:0003676);; Molecular Function: helicase activity (GO:0004386);;	--	Chromatin-remodeling complex ATPase chain isw-1 GN=isw-1 OS=Caenorhabditis elegans PE=1 SV=2	PREDICTED: lymphocyte-specific helicase-like [Nasonia vitripennis]
c54484.graph_c0	0.0047964	1.37659	up	--	Biological Process: metabolic process (GO:0008152);;	--	Phospholipase A1 (Precursor) OS=Polybia paulista (Neotropical social wasp) PE=1 SV=1	PREDICTED: pancreatic triacylglycerol lipase-like [Nasonia vitripennis]
c53677.graph_c0	1.33731e-11	Inf	down	--	--	--	--	endonuclease-like venom protein precursor [Nasonia vitripennis]
c53505.graph_c0	0.00172949	-1.68853	down	--	--	--	Esterase FE4 (Precursor) OS=Myzus persicae (Green peach aphid) PE=1 SV=1	carboxylesterase clade D, member 5 precursor [Nasonia vitripennis]
c52938.graph_c0	0.000266045	2.08453	up	--	--	--	--	--
c52851.graph_c0	1.6935e-15	-3.55699	down	--	Molecular Function: protein binding (GO:0005515);; Cellular Component: lipid particle (GO:0005811);; Cellular Component: microtubule associated complex (GO:0005875);; Biological Process: imaginal disc-derived wing morphogenesis (GO:0007476);; Biological Process: sequestering of triglyceride (GO:0030730);; Biological Process: lipid particle transport along microtubule (GO:0031887);; Biological Pro…	K17284|1.73841e-52|aga:AgaP_AGAP000167|AGAP000167-PA; K17284 perilipin-2 (A)	Lipid storage droplets surface-binding protein 2 OS=Drosophila melanogaster (Fruit fly) PE=1 SV=1	PREDICTED: lipid storage droplets surface-binding protein 2-like [Acromyrmex echinatior]
c52395.graph_c0	4.54793e-06	Inf	up	--	--	--	--	--
c50145.graph_c0	0.000680178	-3.89419	down	--	--	--	--	--
c49452.graph_c0	0.00124293	-1.98715	down	--	Molecular Function: nucleic acid binding (GO:0003676);; Molecular Function: zinc ion binding (GO:0008270);;	K09250|6.05246e-76|nvi:100114151|CCHC-type zinc finger protein CG3800; K09250 cellular nucleic acid-binding protein (A)	CCHC-type zinc finger protein CG3800 GN=CG3800 OS=Drosophila melanogaster (Fruit fly) PE=1 SV=1	PREDICTED: CCHC-type zinc finger protein CG3800 isoform X2 [Nasonia vitripennis]
c47478.graph_c0	0.00530091	1.65743	up	--	--	--	--	--
c47348.graph_c0	4.13085e-28	-6.1083	down	--	Molecular Function: calcium ion binding (GO:0005509);;	--	Troponin C, isoform 1 GN=TpnC41C OS=Drosophila melanogaster (Fruit fly) PE=2 SV=2	PREDICTED: troponin C, isoform 1-like [Harpegnathos saltator]
c47260.graph_c0	0.00415797	-3.13599	down	--	--	--	--	--
c46764.graph_c0	1.52325e-11	-3.16517	down	--	--	--	--	--
c46285.graph_c0	6.48403e-05	Inf	down	--	--	--	--	--
c46157.graph_c0	0.00208922	1.4624	up	Transcription	Molecular Function: DNA binding (GO:0003677);; Biological Process: DNA-templated transcription, initiation (GO:0006352);;	K03120|1.5711e-149|nvi:100119958|TATA-box-binding protein 2; K03120 transcription initiation factor TFIID TATA-box-binding protein (A)	TBP-related factor GN=Trf OS=Drosophila melanogaster (Fruit fly) PE=2 SV=1	PREDICTED: TATA-box-binding protein 2 [Nasonia vitripennis]
c45882.graph_c0	1.2924e-06	2.17572	up	--	--	--	--	PREDICTED: uncharacterized protein LOC100678638 [Nasonia vitripennis]
c45027.graph_c1	8.78354e-05	1.78213	up	Cytoskeleton	Molecular Function: ATP binding (GO:0005524);; Cellular Component: cytoplasm (GO:0005737);; Cellular Component: cytoskeleton (GO:0005856);;	K05692|1.51305e-159|ame:410075|GB12614; actin, clone 205-like; K05692 actin beta/gamma 1 (A)	Actin, clone 205 (Precursor) OS=Artemia sp. (Brine shrimp) PE=2 SV=1	beta-actin, partial [Propylea japonica]
c45027.graph_c0	1.26169e-05	2.08452	up	--	Molecular Function: ATP binding (GO:0005524);; Cellular Component: cytoplasm (GO:0005737);; Cellular Component: cytoskeleton (GO:0005856);;	K05692|1.0078e-111|aga:AgaP_AGAP011516|AGAP011516-PA; K05692 actin beta/gamma 1 (A)	Actin, muscle (Precursor) OS=Manduca sexta (Tobacco hawkmoth) PE=2 SV=1	Actin, muscle [Harpegnathos saltator]
c43723.graph_c0	0.00878979	1.66197	up	--	--	--	--	--
c42748.graph_c1	0.00340063	1.78104	up	--	--	--	--	--
c41623.graph_c0	7.36536e-05	2.19779	up	--	--	--	--	--
c35274.graph_c0	0.00333119	1.58978	up	--	--	K02098|7.15524e-79|ame:727246|protein spire-like; K02098 spire (A)	Protein spire OS=Drosophila melanogaster (Fruit fly) PE=1 SV=1	PREDICTED: protein spire isoform X3 [Microplitis demolitor]
c35178.graph_c0	0.00511257	-1.31759	down	Posttranslational modification, protein turnover, chaperones	Molecular Function: DNA binding (GO:0003677);; Molecular Function: DNA-directed DNA polymerase activity (GO:0003887);; Molecular Function: ubiquitin-protein transferase activity (GO:0004842);; Biological Process: transcription, DNA-templated (GO:0006351);; Biological Process: protein ubiquitination (GO:0016567);;	K10575|9.64989e-113|nvi:100120247|ubiquitin-conjugating enzyme E2 G1; K10575 ubiquitin-conjugating enzyme E2 G1 [EC:6.3.2.19] (A)	Probable ubiquitin-conjugating enzyme E2 7 GN=ubc-7 OS=Caenorhabditis elegans PE=1 SV=1	PREDICTED: ubiquitin-conjugating enzyme E2 G1 [Harpegnathos saltator]
c35172.graph_c0	2.0925e-05	Inf	up	--	--	--	--	PREDICTED: uncharacterized protein LOC103315646 [Nasonia vitripennis]
c35075.graph_c0	0.00545186	2.92686	up	--	--	--	--	--
c34912.graph_c0	0.00565276	3.25036	up	--	--	--	--	--
c34891.graph_c0	3.14949e-10	7.11899	up	--	--	--	--	PREDICTED: uncharacterized protein LOC100680151 [Nasonia vitripennis]
c34847.graph_c1	0.00034908	4.19236	up	--	--	--	--	--
c34663.graph_c0	0.00311401	-3.18826	down	Secondary metabolites biosynthesis, transport and catabolism	Molecular Function: binding (GO:0005488);; Molecular Function: oxidoreductase activity (GO:0016491);;	K15001|2.78991e-34|nvi:100117726|CYP4AB12; cytochrome P450 4AB12; K15001 cytochrome P450, family 4 [EC:1.14.-.-] (A)	Probable cytochrome P450 4p2 GN=Cyp4p2 OS=Drosophila melanogaster (Fruit fly) PE=2 SV=1	cytochrome P450 4AB12 precursor [Nasonia vitripennis]
c34082.graph_c0	3.70425e-14	8.63835	up	--	--	--	--	--
c109105.graph_c0	0.000901178	4.02788	up	--	--	--	--	--
c109010.graph_c0	0.00335928	-2.93301	down	--	--	--	--	--
c108975.graph_c0	0.00258797	2.79459	up	--	--	--	--	--
c108944.graph_c0	2.51367e-31	Inf	down	--	--	--	--	--
c108912.graph_c0	0.000160605	2.00566	up	--	--	--	--	--
c108895.graph_c0	2.50367e-34	-8.31802	down	--	--	--	--	--
c108894.graph_c0	1.88642e-50	-12.7503	down	--	--	--	--	PREDICTED: turripeptide Pal9.2-like [Nasonia vitripennis]
c108891.graph_c0	0.000498997	1.74106	up	--	--	--	--	--
c108872.graph_c0	0.00347175	1.57981	up	--	--	--	--	--
c108847.graph_c0	1.29496e-09	-3.41954	down	General function prediction only	--	K14572|0|nvi:100120017|midasin-like; K14572 midasin (A)	Midasin GN=mdn1 OS=Dictyostelium discoideum (Slime mold) PE=3 SV=2	PREDICTED: LOW QUALITY PROTEIN: midasin-like [Nasonia vitripennis]
c108833.graph_c0	0.00871216	1.54086	up	--	--	--	--	hypothetical protein SINV_02056 [Solenopsis invicta]
c108811.graph_c1	5.47511e-15	-3.41474	down	--	--	--	Apolipophorin-1 (Precursor) OS=Locusta migratoria (Migratory locust) PE=1 SV=2	PREDICTED: LOW QUALITY PROTEIN: uncharacterized protein LOC100118388 [Nasonia vitripennis]
c108806.graph_c1	0.00415769	-2.00475	down	--	--	K14772|0|nvi:100122027|small subunit processome component 20 homolog; K14772 U3 small nucleolar RNA-associated protein 20 (A)	--	PREDICTED: small subunit processome component 20 homolog isoform X3 [Nasonia vitripennis]
c108798.graph_c4	0.00226319	-3.48618	down	--	Molecular Function: calcium ion binding (GO:0005509);; Biological Process: Notch signaling pathway (GO:0007219);; Biological Process: multicellular organismal development (GO:0007275);; Cellular Component: integral component of membrane (GO:0016021);; Biological Process: cell differentiation (GO:0030154);; Biological Process: regulation of developmental process (GO:0050793);;	K02599|2.48676e-84|nvi:100119338|neurogenic locus Notch protein; K02599 Notch (A)	Processed neurogenic locus Notch protein (Precursor) GN=N OS=Drosophila melanogaster (Fruit fly) PE=1 SV=3	PREDICTED: neurogenic locus Notch protein isoform X1 [Nasonia vitripennis]
c108789.graph_c0	0.000675434	-1.58403	down	Cytoskeleton	--	K06115|0|nvi:100122788|spectrin beta chain, non-erythrocytic 1; K06115 spectrin beta (A)	Spectrin beta chain GN=beta-Spec OS=Drosophila melanogaster (Fruit fly) PE=1 SV=2	PREDICTED: spectrin beta chain, non-erythrocytic 1 isoform X2 [Nasonia vitripennis]
c108768.graph_c1	0.000531162	-2.9054	down	--	--	--	--	PREDICTED: microtubule-associated protein futsch-like isoform X1 [Nasonia vitripennis]
c108760.graph_c0	3.30705e-05	-1.89796	down	--	--	--	Protein ELYS homolog GN=CG14215 OS=Drosophila melanogaster (Fruit fly) PE=1 SV=2	PREDICTED: protein ELYS isoform X2 [Nasonia vitripennis]
c108759.graph_c1	5.38513e-10	-6.07498	down	--	Molecular Function: scavenger receptor activity (GO:0005044);; Cellular Component: membrane (GO:0016020);; Molecular Function: carbohydrate binding (GO:0030246);;	--	Scavenger receptor cysteine-rich domain superfamily protein {ECO:0000312|EMBL:BAK39578.1} (Precursor) OS=Patiria pectinifera (Starfish) PE=1 SV=1	PREDICTED: uncharacterized protein LOC100120269 isoform X2 [Nasonia vitripennis]
c108759.graph_c0	2.05437e-07	-8.05964	down	--	Molecular Function: scavenger receptor activity (GO:0005044);; Cellular Component: membrane (GO:0016020);; Molecular Function: carbohydrate binding (GO:0030246);;	--	Scavenger receptor cysteine-rich domain superfamily protein {ECO:0000312|EMBL:BAK39578.1} (Precursor) OS=Patiria pectinifera (Starfish) PE=1 SV=1	PREDICTED: uncharacterized protein LOC100120269 isoform X1 [Nasonia vitripennis]
c108739.graph_c8	0.00353189	-2.14841	down	--	--	K14648|2.23989e-26|nvi:100123738|poly(U)-specific endoribonuclease homolog; K14648 poly(U)-specific endoribonuclease [EC:3.1.-.-] (A)	--	PREDICTED: poly(U)-specific endoribonuclease homolog [Nasonia vitripennis]
c108739.graph_c6	1.2924e-06	-2.81363	down	--	--	--	--	--
c108739.graph_c3	5.87523e-05	-2.11266	down	--	Molecular Function: hydrolase activity, acting on ester bonds (GO:0016788);;	K14648|3.18499e-52|nvi:100123738|poly(U)-specific endoribonuclease homolog; K14648 poly(U)-specific endoribonuclease [EC:3.1.-.-] (A)	Poly(U)-specific endoribonuclease homolog (Precursor) GN=CG2145 OS=Drosophila melanogaster (Fruit fly) PE=1 SV=1	PREDICTED: poly(U)-specific endoribonuclease homolog [Nasonia vitripennis]
c108739.graph_c1	0.000618608	-1.59344	down	--	Molecular Function: hydrolase activity, acting on ester bonds (GO:0016788);;	K14648|2.04693e-99|nvi:100123738|poly(U)-specific endoribonuclease homolog; K14648 poly(U)-specific endoribonuclease [EC:3.1.-.-] (A)	Poly(U)-specific endoribonuclease homolog (Precursor) GN=CG2145 OS=Drosophila melanogaster (Fruit fly) PE=1 SV=1	PREDICTED: poly(U)-specific endoribonuclease homolog [Nasonia vitripennis]
c108739.graph_c0	6.23879e-08	-2.39357	down	--	--	K14648|7.00935e-20|nvi:100123738|poly(U)-specific endoribonuclease homolog; K14648 poly(U)-specific endoribonuclease [EC:3.1.-.-] (A)	--	PREDICTED: poly(U)-specific endoribonuclease homolog [Nasonia vitripennis]
c108721.graph_c0	2.78298e-11	-4.01256	down	--	--	--	--	PREDICTED: interaptin-like [Nasonia vitripennis]
c108712.graph_c0	1.02519e-05	-2.88807	down	--	--	--	--	PREDICTED: uncharacterized protein LOC100678101 isoform X1 [Nasonia vitripennis]
c108703.graph_c0	0.000249789	-7.9454	down	--	--	--	--	PREDICTED: putative uncharacterized protein DDB_G0286901 [Nasonia vitripennis]
c108700.graph_c1	0.000274209	-3.0337	down	--	--	--	--	PREDICTED: uncharacterized protein LOC100678155 isoform X2 [Nasonia vitripennis]
c108700.graph_c0	3.39205e-15	-3.86875	down	--	--	--	--	PREDICTED: uncharacterized protein LOC100678155 isoform X2 [Nasonia vitripennis]
c108687.graph_c0	4.13008e-05	-2.25775	down	--	--	--	Chondroitin proteoglycan-2 (Precursor) GN=cpg-2 OS=Caenorhabditis elegans PE=1 SV=3	PREDICTED: uncharacterized protein LOC100120629 [Nasonia vitripennis]
c108661.graph_c0	1.03795e-06	-3.00859	down	--	Biological Process: cellular process (GO:0009987);; Molecular Function: ion binding (GO:0043167);;	K16308|0|nvi:100122184|citron Rho-interacting kinase-like; K16308 citron Rho-interacting kinase [EC:2.7.11.1] (A)	--	PREDICTED: citron Rho-interacting kinase-like isoform X3 [Nasonia vitripennis]
c108653.graph_c1	4.61325e-06	-2.48237	down	--	--	--	Translational activator gcn1 GN=gcn1l1 OS=Dictyostelium discoideum (Slime mold) PE=3 SV=1	PREDICTED: translational activator GCN1 [Nasonia vitripennis]
c108611.graph_c0	6.82539e-05	-1.96709	down	Posttranslational modification, protein turnover, chaperones	Molecular Function: ubiquitin thiolesterase activity (GO:0004221);; Biological Process: ubiquitin-dependent protein catabolic process (GO:0006511);; Molecular Function: cysteine-type peptidase activity (GO:0008234);;	K11853|0|nvi:100115029|ubiquitin carboxyl-terminal hydrolase 34; K11853 ubiquitin carboxyl-terminal hydrolase 34 [EC:3.4.19.12] (A)	Probable ubiquitin carboxyl-terminal hydrolase FAF GN=faf OS=Drosophila melanogaster (Fruit fly) PE=1 SV=2	PREDICTED: LOW QUALITY PROTEIN: ubiquitin carboxyl-terminal hydrolase 34 [Nasonia vitripennis]
c108609.graph_c0	0.00721251	-1.49536	down	--	--	--	--	--
c108599.graph_c2	8.16731e-05	1.83754	up	--	--	--	--	--
c108588.graph_c0	0.00183665	-1.55346	down	--	Molecular Function: nucleic acid binding (GO:0003676);; Molecular Function: metal ion binding (GO:0046872);;	K17452|4.2363e-77|nvi:100120674|zinc finger protein jing; K17452 zinc finger protein AEBP2 (A)	Zinc finger protein jing homolog GN=AAEL000263 OS=Aedes aegypti (Yellowfever mosquito) PE=3 SV=1	PREDICTED: zinc finger protein jing isoform X2 [Nasonia vitripennis]
c108561.graph_c0	0.000393135	-1.6919	down	--	Cellular Component: basement membrane (GO:0005604);; Biological Process: cell adhesion (GO:0007155);; Biological Process: regulation of cellular process (GO:0050794);;	K06240|0|nvi:100119934|laminin subunit alpha; K06240 laminin, alpha 3/5 (A)	Laminin subunit alpha (Precursor) GN=LanA OS=Drosophila melanogaster (Fruit fly) PE=1 SV=2	PREDICTED: laminin subunit alpha [Nasonia vitripennis]
c108547.graph_c1	0.0051628	-1.85115	down	--	--	--	--	PREDICTED: uncharacterized protein LOC100881888 [Megachile rotundata]
c108543.graph_c2	0.00607722	1.34894	up	--	--	--	Low-density lipoprotein receptor-related protein (Precursor) GN=lrp-1 OS=Caenorhabditis elegans PE=1 SV=1	PREDICTED: low-density lipoprotein receptor-related protein 4-like [Nasonia vitripennis]
c108531.graph_c2	0.00167955	-1.68248	down	Energy production and conversion	Molecular Function: methyltransferase activity (GO:0008168);; Biological Process: biosynthetic process (GO:0009058);; Molecular Function: oxidoreductase activity, acting on the aldehyde or oxo group of donors, NAD or NADP as acceptor (GO:0016620);; Molecular Function: hydroxymethyl-, formyl- and related transferase activity (GO:0016742);; Biological Process: methylation (GO:0032259);; Biological …	K00289|0|nvi:100119020|cytosolic 10-formyltetrahydrofolate dehydrogenase; K00289 formyltetrahydrofolate dehydrogenase [EC:1.5.1.6] (A)	Omega-crystallin OS=Nototodarus sloanii (Wellington flying squid) PE=2 SV=3	PREDICTED: cytosolic 10-formyltetrahydrofolate dehydrogenase [Nasonia vitripennis]
c108523.graph_c0	0.00251556	-1.62449	down	--	--	--	JmjC domain-containing protein D GN=jcdD OS=Dictyostelium discoideum (Slime mold) PE=3 SV=1	PREDICTED: lysine-specific demethylase 8 [Nasonia vitripennis]
c108509.graph_c1	0.00694882	-2.97678	down	--	Molecular Function: nucleic acid binding (GO:0003676);; Cellular Component: nucleus (GO:0005634);; Molecular Function: zinc ion binding (GO:0008270);;	--	--	PREDICTED: uncharacterized protein LOC100124086 [Nasonia vitripennis]
c108504.graph_c1	5.89892e-05	-2.17887	down	--	--	K14296|0|nvi:100121608|nuclear pore complex protein Nup153; K14296 nuclear pore complex protein Nup153 (A)	Nuclear pore complex protein Nup153 GN=Nup153 OS=Drosophila melanogaster (Fruit fly) PE=1 SV=4	PREDICTED: nuclear pore complex protein Nup153 isoform X1 [Nasonia vitripennis]
c108502.graph_c1	0.00558726	-2.37901	down	--	Molecular Function: alcohol dehydrogenase (NAD) activity (GO:0004022);; Molecular Function: calcium ion binding (GO:0005509);; Cellular Component: plasma membrane (GO:0005886);; Biological Process: homophilic cell adhesion via plasma membrane adhesion molecules (GO:0007156);; Cellular Component: integral component of membrane (GO:0016021);; Biological Process: oxidation-reduction process (GO:0055…	K16500|0|nvi:100122201|protocadherin-15; K16500 protocadherin-15 (A)	Protocadherin-like wing polarity protein stan (Precursor) GN=stan OS=Drosophila melanogaster (Fruit fly) PE=1 SV=4	PREDICTED: LOW QUALITY PROTEIN: protocadherin-15 [Nasonia vitripennis]
c108490.graph_c3	0.00708252	-1.53581	down	Amino acid transport and metabolism	Molecular Function: glycine dehydrogenase (decarboxylating) activity (GO:0004375);; Biological Process: glycine catabolic process (GO:0006546);; Molecular Function: lyase activity (GO:0016829);; Molecular Function: pyridoxal phosphate binding (GO:0030170);; Biological Process: oxidation-reduction process (GO:0055114);;	K00281|0|nvi:100121509|glycine dehydrogenase (decarboxylating), mitochondrial; K00281 glycine dehydrogenase [EC:1.4.4.2] (A)	Glycine dehydrogenase (decarboxylating), mitochondrial (Precursor) GN=gcvP OS=Dictyostelium discoideum (Slime mold) PE=3 SV=1	PREDICTED: glycine dehydrogenase (decarboxylating), mitochondrial [Nasonia vitripennis]
c108489.graph_c0	0.0095475	2.14284	up	--	Molecular Function: calcium ion binding (GO:0005509);; Cellular Component: plasma membrane (GO:0005886);; Biological Process: homophilic cell adhesion via plasma membrane adhesion molecules (GO:0007156);; Cellular Component: integral component of membrane (GO:0016021);;	--	Cadherin-87A (Precursor) GN=Cad87A OS=Drosophila melanogaster (Fruit fly) PE=1 SV=4	PREDICTED: cadherin-23 [Nasonia vitripennis]
c108485.graph_c0	2.37723e-12	-4.40607	down	--	--	K10357|0|nvi:100120420|Myo5; unconventional myosin-Va; K10357 myosin V (A)	Myosin-J heavy chain GN=myoJ OS=Dictyostelium discoideum (Slime mold) PE=3 SV=2	PREDICTED: unconventional myosin-Va isoform X1 [Solenopsis invicta]
c108480.graph_c0	2.08198e-12	-3.0788	down	Secondary metabolites biosynthesis, transport and catabolism	--	K15001|0|nvi:100678933|cytochrome P450 4c3-like; K15001 cytochrome P450, family 4 [EC:1.14.-.-] (A)	Cytochrome P450 4c3 GN=Cyp4c3 OS=Drosophila melanogaster (Fruit fly) PE=2 SV=1	PREDICTED: cytochrome P450 4c3-like isoform X3 [Nasonia vitripennis]
c108472.graph_c1	0.00878078	-1.30058	down	--	--	K10586|0|nvi:100117554|survivin 1; K10586 baculoviral IAP repeat-containing protein 6 (apollon) [EC:6.3.2.19] (A)	Apoptosis 1 inhibitor GN=th OS=Drosophila melanogaster (Fruit fly) PE=1 SV=2	PREDICTED: baculoviral IAP repeat-containing protein 6 isoform X4 [Nasonia vitripennis]
c108466.graph_c0	0.00159978	-1.65747	down	--	--	K16804|8.83155e-146|nvi:100678745|titin-like; K16804 disks large-associated protein 5 (A)	Guanylate kinase-associated protein mars GN=mars OS=Drosophila melanogaster (Fruit fly) PE=1 SV=1	PREDICTED: titin-like [Nasonia vitripennis]
c108452.graph_c1	0.000452039	-1.77403	down	--	Molecular Function: extracellular ligand-gated ion channel activity (GO:0005230);; Cellular Component: plasma membrane (GO:0005886);; Biological Process: ion transport (GO:0006811);; Cellular Component: integral component of membrane (GO:0016021);; Cellular Component: cell junction (GO:0030054);; Cellular Component: postsynaptic membrane (GO:0045211);;	K05636|0|nvi:100123956|laminin subunit beta-1; K05636 laminin, beta 1 (A)	Laminin subunit beta-1 (Precursor) GN=LanB1 OS=Drosophila melanogaster (Fruit fly) PE=1 SV=4	PREDICTED: laminin subunit beta-1 [Nasonia vitripennis]
c108440.graph_c0	2.18796e-06	-2.39723	down	--	--	K14314|0|nvi:100116987|nuclear pore membrane glycoprotein 210; K14314 nuclear pore complex protein Nup210 (A)	--	PREDICTED: nuclear pore membrane glycoprotein 210 [Nasonia vitripennis]
c108425.graph_c3	0.00360173	-1.43457	down	--	--	--	Protein lap1 GN=let-413 OS=Caenorhabditis elegans PE=1 SV=3	PREDICTED: uncharacterized protein LOC100122714 [Nasonia vitripennis]
c108377.graph_c1	1.65698e-06	-2.7521	down	--	Molecular Function: calcium-dependent cysteine-type endopeptidase activity (GO:0004198);; Cellular Component: intracellular (GO:0005622);; Biological Process: proteolysis (GO:0006508);; Molecular Function: zinc ion binding (GO:0008270);;	K08582|0|nvi:100123237|uncharacterized LOC100123237; K08582 calpain-15 [EC:3.4.22.-] (A)	Calpain-D GN=sol OS=Drosophila melanogaster (Fruit fly) PE=1 SV=2	PREDICTED: uncharacterized protein LOC100123237 [Nasonia vitripennis]
c108370.graph_c0	1.30889e-08	-2.95519	down	General function prediction only	--	--	Tankyrase OS=Drosophila melanogaster (Fruit fly) PE=1 SV=1	PREDICTED: uncharacterized protein LOC105193745 [Solenopsis invicta]
c108359.graph_c1	0.00947843	-1.41696	down	--	Molecular Function: transmembrane receptor protein tyrosine kinase activity (GO:0004714);; Molecular Function: ATP binding (GO:0005524);; Biological Process: protein phosphorylation (GO:0006468);; Biological Process: transmembrane receptor protein tyrosine kinase signaling pathway (GO:0007169);; Biological Process: multicellular organismal development (GO:0007275);; Cellular Component: integral c…	K04361|0|nvi:100118970|Egfr, Top; epidermal growth factor receptor; K04361 epidermal growth factor receptor [EC:2.7.10.1] (A)	Epidermal growth factor receptor GN=Egfr OS=Apis mellifera (Honeybee) PE=2 SV=1	PREDICTED: epidermal growth factor receptor isoform X1 [Nasonia vitripennis]
c108358.graph_c0	0.00503884	-1.88913	down	--	--	K06100|0|nvi:100115565|symplekin; K06100 symplekin (A)	Symplekin {ECO:0000312|EMBL:AAF51962.2} GN=Sym OS=Drosophila melanogaster (Fruit fly) PE=1 SV=1	PREDICTED: symplekin [Nasonia vitripennis]
c108348.graph_c0	3.58968e-12	-6.08345	down	--	--	--	--	PREDICTED: uncharacterized protein LOC103317810 [Nasonia vitripennis]
c108335.graph_c0	4.7179e-05	-3.14324	down	--	--	K16743|0|nvi:100122962|protein abnormal spindle; K16743 abnormal spindle-like microcephaly-associated protein (A)	Protein abnormal spindle OS=Drosophila melanogaster (Fruit fly) PE=1 SV=3	PREDICTED: protein abnormal spindle [Nasonia vitripennis]
c108332.graph_c1	0.00238208	-1.88237	down	General function prediction only	--	--	Protein charlatan GN=chn OS=Drosophila melanogaster (Fruit fly) PE=2 SV=3	PREDICTED: SH3 and multiple ankyrin repeat domains protein 1 isoform X5 [Acromyrmex echinatior]
c108332.graph_c0	4.08201e-20	-4.79289	down	--	--	--	--	--
c108324.graph_c1	0.00074963	-1.60222	down	--	Molecular Function: DNA binding (GO:0003677);; Molecular Function: biotin carboxylase activity (GO:0004075);; Molecular Function: pyruvate carboxylase activity (GO:0004736);; Molecular Function: ATP binding (GO:0005524);; Biological Process: gluconeogenesis (GO:0006094);; Molecular Function: metal ion binding (GO:0046872);;	K01958|0|nvi:100115516|pyruvate carboxylase, mitochondrial; K01958 pyruvate carboxylase [EC:6.4.1.1] (A)	Pyruvate carboxylase 1 OS=Caenorhabditis elegans PE=1 SV=1	PREDICTED: pyruvate carboxylase, mitochondrial isoform X1 [Nasonia vitripennis]
c108324.graph_c0	0.00359643	-1.43926	down	Energy production and conversion	Molecular Function: DNA binding (GO:0003677);; Molecular Function: biotin carboxylase activity (GO:0004075);; Molecular Function: pyruvate carboxylase activity (GO:0004736);; Molecular Function: ATP binding (GO:0005524);; Biological Process: gluconeogenesis (GO:0006094);; Molecular Function: metal ion binding (GO:0046872);;	K01958|0|nvi:100115516|pyruvate carboxylase, mitochondrial; K01958 pyruvate carboxylase [EC:6.4.1.1] (A)	Pyruvate carboxylase 1 OS=Caenorhabditis elegans PE=1 SV=1	PREDICTED: pyruvate carboxylase, mitochondrial isoform X1 [Nasonia vitripennis]
c108310.graph_c0	0.00401898	-1.76367	down	Signal transduction mechanisms	Molecular Function: protein tyrosine phosphatase activity (GO:0004725);; Biological Process: peptidyl-tyrosine dephosphorylation (GO:0035335);;	K04458|0|nvi:100121321|tyrosine-protein phosphatase non-receptor type 5-like; K04458 receptor-type tyrosine-protein phosphatase R [EC:3.1.3.48] (A)	Tyrosine-protein phosphatase Lar-like (Precursor) GN=ptp-3 OS=Caenorhabditis elegans PE=1 SV=1	PREDICTED: tyrosine-protein phosphatase non-receptor type 5-like [Nasonia vitripennis]
c108309.graph_c0	6.39951e-06	-2.35395	down	General function prediction only	--	--	Alpha-latrocrustotoxin-Lt1a (Precursor; Fragment) OS=Latrodectus tredecimguttatus (Mediterranean black widow spider) PE=2 SV=2	PREDICTED: serine/threonine-protein phosphatase 6 regulatory ankyrin repeat subunit A-like [Nasonia vitripennis]
c108304.graph_c0	7.74701e-06	-2.61194	down	--	Cellular Component: origin recognition complex (GO:0000808);; Molecular Function: ATP binding (GO:0005524);; Cellular Component: nucleus (GO:0005634);; Biological Process: DNA replication (GO:0006260);; Molecular Function: nucleoside-triphosphatase activity (GO:0017111);;	K02603|0|nvi:100121366|origin recognition complex subunit 1; K02603 origin recognition complex subunit 1 (A)	Origin recognition complex subunit 1 GN=Orc1 OS=Drosophila melanogaster (Fruit fly) PE=1 SV=2	PREDICTED: origin recognition complex subunit 1 isoform X2 [Nasonia vitripennis]
c108299.graph_c0	1.86289e-05	-2.21936	down	--	--	K11498|0|nvi:100121143|kinesin-7; kinesin 7; K11498 centromeric protein E (A)	--	PREDICTED: centromere-associated protein E [Nasonia vitripennis]
c108296.graph_c2	0.00499145	-1.9408	down	--	Cellular Component: intracellular (GO:0005622);; Biological Process: motor neuron axon guidance (GO:0008045);; Molecular Function: axon guidance receptor activity (GO:0008046);; Molecular Function: heparin binding (GO:0008201);; Cellular Component: integral component of membrane (GO:0016021);; Biological Process: axon midline choice point recognition (GO:0016199);; Molecular Function: semaphorin …	K06820|0|ame:410785|plexA, GB16227; plexin A; K06820 plexin A (A)	Plexin-B (Precursor) GN=plexB OS=Drosophila melanogaster (Fruit fly) PE=1 SV=2	PREDICTED: plexin-A4 [Solenopsis invicta]
c108292.graph_c0	2.98757e-06	-2.85108	down	Replication, recombination and repair	Molecular Function: nucleic acid binding (GO:0003676);; Biological Process: nucleobase-containing compound metabolic process (GO:0006139);; Molecular Function: nucleotidyltransferase activity (GO:0016779);; Molecular Function: small molecule binding (GO:0036094);;	K02320|0|nvi:100120035|DNA polymerase alpha catalytic subunit; K02320 DNA polymerase alpha subunit A [EC:2.7.7.7] (A)	DNA polymerase alpha catalytic subunit GN=DNApol-alpha180 OS=Drosophila melanogaster (Fruit fly) PE=1 SV=2	PREDICTED: DNA polymerase alpha catalytic subunit [Nasonia vitripennis]
c108288.graph_c1	0.00812369	1.39766	up	--	--	K15378|0|nvi:100123973|proton-associated sugar transporter A-like; K15378 solute carrier family 45, member 1/2/4 (A)	--	PREDICTED: proton-associated sugar transporter A-like isoform X2 [Nasonia vitripennis]
c108278.graph_c0	0.00124575	-1.95879	down	Replication, recombination and repair	Molecular Function: nucleic acid binding (GO:0003676);; Molecular Function: ATP binding (GO:0005524);; Cellular Component: intracellular (GO:0005622);; Biological Process: DNA replication (GO:0006260);; Biological Process: DNA repair (GO:0006281);; Biological Process: DNA recombination (GO:0006310);; Molecular Function: ATP-dependent 3'-5' DNA helicase activity (GO:0043140);;	K10901|0|nvi:100122151|BLM, RECQ2; Bloom syndrome, RecQ helicase-like; K10901 bloom syndrome protein [EC:3.6.4.12] (A)	Bloom syndrome protein homolog GN=Blm OS=Drosophila melanogaster (Fruit fly) PE=1 SV=1	PREDICTED: Bloom syndrome protein homolog [Nasonia vitripennis]
c108265.graph_c0	0.00256762	1.56824	up	--	--	--	RNA-directed DNA polymerase from mobile element jockey GN=pol OS=Drosophila melanogaster (Fruit fly) PE=1 SV=1	PREDICTED: uncharacterized protein LOC101746992 [Bombyx mori]
c108258.graph_c0	0.00369417	-2.31236	down	--	--	--	Exportin-4 GN=xpo4 OS=Dictyostelium discoideum (Slime mold) PE=3 SV=1	PREDICTED: exportin-4-like [Nasonia vitripennis]
c108253.graph_c1	1.74993e-09	-3.98399	down	--	--	--	Protein aubergine {ECO:0000312|EMBL:AGA18944.1} GN=aub OS=Drosophila melanogaster (Fruit fly) PE=1 SV=1	PREDICTED: protein aubergine-like [Nasonia vitripennis]
c108239.graph_c0	0.00896604	2.06734	up	Replication, recombination and repair	Molecular Function: catalytic activity (GO:0003824);;	--	Endonuclease GN=POL OS=Drosophila melanogaster (Fruit fly) PE=3 SV=1	PREDICTED: uncharacterized protein LOC105183020 [Harpegnathos saltator]
c108236.graph_c1	7.60658e-05	-2.14605	down	Posttranslational modification, protein turnover, chaperones	Molecular Function: ATP binding (GO:0005524);; Molecular Function: nucleoside-triphosphatase activity (GO:0017111);;	--	Tat-binding homolog 7 GN=lex-1 OS=Caenorhabditis elegans PE=1 SV=3	PREDICTED: ATPase family AAA domain-containing protein 2-like [Nasonia vitripennis]
c108234.graph_c0	0.000459801	-1.80701	down	--	--	--	--	PREDICTED: serine/arginine repetitive matrix protein 2-like isoform X1 [Nasonia vitripennis]
c108201.graph_c1	0.0028566	-1.84921	down	General function prediction only	Molecular Function: nucleic acid binding (GO:0003676);; Cellular Component: nucleus (GO:0005634);; Molecular Function: zinc ion binding (GO:0008270);;	--	Protein glass GN=gl OS=Drosophila virilis (Fruit fly) PE=3 SV=1	PREDICTED: uncharacterized protein LOC100678349 isoform X3 [Nasonia vitripennis]
c108196.graph_c1	0.000175054	1.73947	up	--	--	--	--	PREDICTED: nesprin-1 [Nasonia vitripennis]
c108172.graph_c0	2.04576e-05	2.00709	up	--	--	--	--	--
c108160.graph_c0	1.31063e-14	-3.66028	down	--	--	--	--	PREDICTED: microtubule-associated protein futsch-like [Nasonia vitripennis]
c108143.graph_c0	7.14759e-06	-2.09251	down	--	--	K06699|0|nvi:100118287|proteasome activator complex subunit 4B-like; K06699 proteasome activator subunit 4 (A)	--	PREDICTED: proteasome activator complex subunit 4B-like isoform X1 [Nasonia vitripennis]
c108094.graph_c0	0.00711774	1.72148	up	--	--	--	--	--
c108092.graph_c0	2.65555e-07	-2.86775	down	General function prediction only	--	--	Homeobox protein Wariai GN=warA OS=Dictyostelium discoideum (Slime mold) PE=2 SV=1	PREDICTED: uncharacterized protein LOC100124037 [Nasonia vitripennis]
c108090.graph_c0	1.6192e-10	-3.83881	down	--	--	K18621|0|nvi:100119116|actin-binding protein anillin-like; K18621 actin-binding protein anillin (A)	Actin-binding protein anillin GN=scra OS=Drosophila melanogaster (Fruit fly) PE=1 SV=3	PREDICTED: actin-binding protein anillin-like, partial [Nasonia vitripennis]
c108063.graph_c0	0.00920401	2.219	up	Replication, recombination and repair	--	--	Endonuclease GN=pol OS=Drosophila melanogaster (Fruit fly) PE=3 SV=1	PREDICTED: uncharacterized protein LOC100906527 [Metaseiulus occidentalis]
c108056.graph_c1	8.60691e-07	-2.14054	down	--	--	K08267|0|nvi:100119040|rapamycin-insensitive companion of mTOR; K08267 rapamycin-insensitive companion of mTOR (A)	Protein pianissimo A GN=piaA OS=Dictyostelium discoideum (Slime mold) PE=1 SV=1	PREDICTED: LOW QUALITY PROTEIN: rapamycin-insensitive companion of mTOR [Nasonia vitripennis]
c108052.graph_c0	0.00289595	-2.96642	down	--	Molecular Function: neurotransmitter:sodium symporter activity (GO:0005328);; Biological Process: neurotransmitter transport (GO:0006836);; Molecular Function: zinc ion binding (GO:0008270);; Cellular Component: integral component of membrane (GO:0016021);;	K05336|1.58638e-114|nvi:100123368|uncharacterized LOC100123368; K05336 solute carrier family 6 (neurotransmitter transporter), invertebrate (A)	--	PREDICTED: uncharacterized protein LOC100123368 [Nasonia vitripennis]
c108050.graph_c0	0.00494785	-1.79114	down	Replication, recombination and repair	Molecular Function: nucleic acid binding (GO:0003676);; Molecular Function: helicase activity (GO:0004386);;	K10896|0|nvi:100123563|Fanconi anemia group M protein homolog; K10896 fanconi anemia group M protein (A)	Kynurenine--oxoglutarate transaminase GN=ccbl OS=Dictyostelium discoideum (Slime mold) PE=3 SV=1	PREDICTED: uncharacterized protein LOC100123563 isoform X2 [Nasonia vitripennis]
c108034.graph_c0	0.00159764	1.51393	up	--	--	--	Twitchin {ECO:0000303|PubMed:7190524} OS=Caenorhabditis elegans PE=1 SV=3	PREDICTED: serine/arginine repetitive matrix protein 2 isoform X4 [Nasonia vitripennis]
c108030.graph_c1	0.000211972	1.77714	up	--	Molecular Function: signal transducer activity (GO:0004871);; Biological Process: regulation of transcription, DNA-templated (GO:0006355);; Biological Process: signal transduction (GO:0007165);;	K02633|3.09069e-21|nvi:100121302|period circadian protein; K02633 period circadian protein (A)	--	PREDICTED: period circadian protein isoform X3 [Nasonia vitripennis]
c108023.graph_c0	0.00610549	-1.8257	down	--	--	--	--	PREDICTED: uncharacterized protein LOC100116463 [Nasonia vitripennis]
c108015.graph_c0	0.00886017	-1.30838	down	--	--	--	--	PREDICTED: uncharacterized protein LOC100678782 [Nasonia vitripennis]
c108001.graph_c0	9.91691e-12	-6.75429	down	--	--	--	--	--
c107983.graph_c1	0.00505545	1.58014	up	--	--	--	--	--
c107983.graph_c0	6.4142e-07	-2.22009	down	--	--	--	Kunitz-type serine protease inhibitor InhVJ (Precursor) OS=Heteractis crispa (Leathery sea anemone) PE=1 SV=1	cysteine-rich/KU venom protein precursor [Nasonia vitripennis]
c107975.graph_c0	0.00268861	-1.72371	down	Translation, ribosomal structure and biogenesis	--	K14564|3.76862e-116|nvi:100120066|nucleolar protein 56; K14564 nucleolar protein 56 (A)	Uncharacterized NOP5 family protein K07C5.4 GN=K07C5.4 OS=Caenorhabditis elegans PE=3 SV=1	PREDICTED: nucleolar protein 56 [Nasonia vitripennis]
c107972.graph_c0	0.00769642	1.66516	up	--	--	--	--	--
c107967.graph_c2	0.00293202	1.74728	up	--	--	--	--	--
c107962.graph_c0	5.5006e-09	-2.51817	down	--	Molecular Function: organic cyclic compound binding (GO:0097159);; Molecular Function: heterocyclic compound binding (GO:1901363);;	K17573|0|nvi:100116303|meiosis arrest female protein 1; K17573 meiosis arrest female protein 1 (A)	NADH dehydrogenase [ubiquinone] 1 beta subcomplex subunit 10 OS=Bombyx mori (Silk moth) PE=1 SV=1	PREDICTED: meiosis arrest female protein 1 [Nasonia vitripennis]
c107954.graph_c0	0.00128323	-1.95874	down	--	--	--	--	PREDICTED: microtubule-associated protein futsch-like [Nasonia vitripennis]
c107943.graph_c0	0.00053699	-1.94719	down	--	--	--	Protein xmas-2 GN=xmas-2 OS=Drosophila melanogaster (Fruit fly) PE=1 SV=3	PREDICTED: germinal-center associated nuclear protein [Nasonia vitripennis]
c107942.graph_c2	0.00650693	-1.52741	down	--	--	K06672|0|nvi:100119961|nipped-B-like protein B; K06672 cohesin loading factor subunit SCC2 (A)	Nipped-B protein GN=Nipped-B OS=Drosophila melanogaster (Fruit fly) PE=1 SV=3	PREDICTED: nipped-B-like protein B isoform X1 [Nasonia vitripennis]
c107888.graph_c0	2.56784e-05	-2.04743	down	Secondary metabolites biosynthesis, transport and catabolism	Molecular Function: catalytic activity (GO:0003824);;	--	Probable polyketide synthase 16 GN=pks16 OS=Dictyostelium discoideum (Slime mold) PE=2 SV=1	PREDICTED: fatty acid synthase-like [Nasonia vitripennis]
c107887.graph_c2	0.00721564	-1.64187	down	Lipid transport and metabolism	Biological Process: metabolic process (GO:0008152);; Molecular Function: ligase activity (GO:0016874);;	K15013|0|nvi:100122465|very long-chain-fatty-acid--CoA ligase bubblegum; K15013 long-chain-fatty-acid--CoA ligase ACSBG [EC:6.2.1.3] (A)	Very long-chain-fatty-acid--CoA ligase bubblegum GN=bgm OS=Drosophila melanogaster (Fruit fly) PE=2 SV=1	PREDICTED: very long-chain-fatty-acid--CoA ligase bubblegum isoform X1 [Nasonia vitripennis]
c107882.graph_c0	0.00327461	-1.78291	down	General function prediction only	--	K11798|0|nvi:100122825|PH-interacting protein; K11798 bromodomain and WD repeat domain containing protein 1/3 (A)	Bromodomain and WD repeat-containing DDB_G0285837 GN=DDB_G0285837 OS=Dictyostelium discoideum (Slime mold) PE=3 SV=1	PREDICTED: PH-interacting protein, partial [Nasonia vitripennis]
c107865.graph_c1	0.000168424	-2.4735	down	Inorganic ion transport and metabolism	Biological Process: cation transport (GO:0006812);; Molecular Function: cation transmembrane transporter activity (GO:0008324);; Cellular Component: integral component of membrane (GO:0016021);; Biological Process: transmembrane transport (GO:0055085);;	K14688|5.35445e-138|nvi:100677972|zinc transporter 1; K14688 solute carrier family 30 (zinc transporter), member 1 (A)	Probable zinc transporter protein DDB_G0282067 GN=DDB_G0282067 OS=Dictyostelium discoideum (Slime mold) PE=2 SV=1	PREDICTED: zinc transporter 1-like [Megachile rotundata]
c107865.graph_c0	0.00363422	-2.732	down	Inorganic ion transport and metabolism	Biological Process: cation transport (GO:0006812);; Molecular Function: cation transmembrane transporter activity (GO:0008324);; Cellular Component: integral component of membrane (GO:0016021);; Biological Process: transmembrane transport (GO:0055085);;	K14688|7.5437e-37|nvi:100677972|zinc transporter 1; K14688 solute carrier family 30 (zinc transporter), member 1 (A)	Cation diffusion facilitator family protein 1 GN=cdf-1 OS=Caenorhabditis elegans PE=1 SV=1	hypothetical protein D910_11787, partial [Dendroctonus ponderosae]
c107859.graph_c4	0.00137888	1.54672	up	Energy production and conversion	Cellular Component: Golgi apparatus (GO:0005794);; Biological Process: protein glycosylation (GO:0006486);; Cellular Component: integral component of membrane (GO:0016021);; Molecular Function: transferase activity, transferring glycosyl groups (GO:0016757);;	K00710|0|nvi:100120912|polypeptide GalNAc transferase 6-like; K00710 polypeptide N-acetylgalactosaminyltransferase [EC:2.4.1.41] (A)	N-acetylgalactosaminyltransferase 6 GN=pgant6 OS=Drosophila melanogaster (Fruit fly) PE=2 SV=2	polypeptide GalNAc transferase 6-like [Nasonia vitripennis]
c107843.graph_c3	0.00577201	1.40503	up	--	--	--	--	--
c107843.graph_c1	0.000661482	1.68166	up	--	--	--	--	--
c107837.graph_c0	6.65688e-22	-9.60407	down	--	--	--	--	nasrat [Nasonia vitripennis]
c107823.graph_c0	6.95746e-09	-3.39037	down	Lipid transport and metabolism	--	--	Nose resistant to fluoxetine protein 6 (Precursor) GN=nrf-6 OS=Caenorhabditis elegans PE=1 SV=3	PREDICTED: nose resistant to fluoxetine protein 6-like [Nasonia vitripennis]
c107819.graph_c0	0.00588335	2.98122	up	--	--	--	--	PREDICTED: neurofilament medium polypeptide-like [Nasonia vitripennis]
c107814.graph_c1	0.00271342	1.43831	up	--	Molecular Function: actin binding (GO:0003779);;	--	Actobindin-B/C GN=abnC OS=Dictyostelium discoideum (Slime mold) PE=3 SV=1	PREDICTED: FK506-binding protein 5 isoform X1 [Harpegnathos saltator]
c107813.graph_c1	1.40175e-05	6.0126	up	--	--	--	--	PREDICTED: uncharacterized protein LOC100678651 [Nasonia vitripennis]
c107810.graph_c1	2.8648e-06	2.12723	up	--	--	--	--	--
c107774.graph_c3	0.00573323	-2.09169	down	--	--	--	--	--
c107773.graph_c2	6.18461e-05	-2.15466	down	--	Molecular Function: nucleotide binding (GO:0000166);; Molecular Function: protein kinase activity (GO:0004672);; Biological Process: phosphorylation (GO:0016310);;	K16309|0|nvi:100117041|serine/threonine-protein kinase greatwall; K16309 serine/threonine-protein kinase greatwall [EC:2.7.11.1] (A)	Probable serine/threonine-protein kinase DDB_G0272282 GN=DDB_G0272282 OS=Dictyostelium discoideum (Slime mold) PE=3 SV=1	PREDICTED: serine/threonine-protein kinase greatwall isoform X1 [Nasonia vitripennis]
c107768.graph_c2	3.15596e-07	-6.19634	down	--	--	--	--	--
c107768.graph_c1	0.000276394	2.75313	up	--	--	--	--	PREDICTED: uncharacterized protein LOC100882648 [Megachile rotundata]
c107768.graph_c0	1.06918e-05	-4.80716	down	--	--	--	--	--
c107767.graph_c0	0.000321925	-2.00648	down	Cytoskeleton	Molecular Function: motor activity (GO:0003774);; Molecular Function: ATP binding (GO:0005524);; Cellular Component: myosin complex (GO:0016459);; Biological Process: intracellular signal transduction (GO:0035556);; Molecular Function: metal ion binding (GO:0046872);;	K10360|0|nvi:100121553|Myo9; unconventional myosin-IXb; K10360 myosin IX (A)	Myosin-J heavy chain GN=myoJ OS=Dictyostelium discoideum (Slime mold) PE=3 SV=2	PREDICTED: unconventional myosin-IXb [Nasonia vitripennis]
c107757.graph_c0	0.000330593	-1.67111	down	--	--	--	--	uncharacterized protein LOC100187594 [Nasonia vitripennis]
c107735.graph_c2	0.00069349	-2.6384	down	Replication, recombination and repair	Molecular Function: DNA binding (GO:0003677);; Molecular Function: DNA helicase activity (GO:0003678);; Molecular Function: ATP binding (GO:0005524);; Cellular Component: nucleus (GO:0005634);; Biological Process: DNA replication initiation (GO:0006270);; Biological Process: mitotic nuclear division (GO:0007067);; Biological Process: DNA duplex unwinding (GO:0032508);; Cellular Component: MCM com…	K02542|0|nvi:100117470|DNA replication licensing factor Mcm6; K02542 DNA replication licensing factor MCM6 [EC:3.6.4.12] (A)	DNA replication licensing factor Mcm6 OS=Anopheles gambiae (African malaria mosquito) PE=3 SV=3	PREDICTED: DNA replication licensing factor Mcm6 [Nasonia vitripennis]
c107735.graph_c1	0.00831023	-2.10559	down	Replication, recombination and repair	Molecular Function: DNA binding (GO:0003677);; Molecular Function: DNA helicase activity (GO:0003678);; Molecular Function: ATP binding (GO:0005524);; Cellular Component: nucleus (GO:0005634);; Biological Process: DNA replication initiation (GO:0006270);; Biological Process: DNA duplex unwinding (GO:0032508);; Cellular Component: MCM complex (GO:0042555);;	K02542|4.23181e-163|nvi:100117470|DNA replication licensing factor Mcm6; K02542 DNA replication licensing factor MCM6 [EC:3.6.4.12] (A)	DNA replication licensing factor Mcm6 OS=Anopheles gambiae (African malaria mosquito) PE=3 SV=3	PREDICTED: DNA replication licensing factor Mcm6 [Nasonia vitripennis]
c107727.graph_c0	0.00393596	1.69518	up	--	--	--	--	PREDICTED: lisH domain-containing protein C1711.05 [Nasonia vitripennis]
c107725.graph_c1	4.10045e-05	1.83679	up	--	Molecular Function: transferase activity (GO:0016740);;	--	--	PREDICTED: cell wall protein RBR3 [Nasonia vitripennis]
c107725.graph_c0	0.00333571	1.38008	up	--	--	--	--	PREDICTED: cell wall protein RBR3 [Nasonia vitripennis]
c107719.graph_c0	1.32628e-06	-4.15125	down	General function prediction only	Biological Process: lipid metabolic process (GO:0006629);; Molecular Function: hydrolase activity (GO:0016787);;	--	Lipase 3 (Precursor) GN=Lip3 OS=Drosophila melanogaster (Fruit fly) PE=2 SV=1	PREDICTED: lipase 3-like [Nasonia vitripennis]
c107714.graph_c0	0.000197011	1.8054	up	--	--	K17580|0|nvi:100679513|protein CASC1; K17580 cancer susceptibility candidate protein 1 (A)	Axonemal 84 kDa protein GN=AXP83.9 OS=Ciona intestinalis (Transparent sea squirt) PE=2 SV=1	PREDICTED: protein CASC1 [Nasonia vitripennis]
c107692.graph_c0	0.000440473	-2.79173	down	--	--	--	--	PREDICTED: mediator of DNA damage checkpoint protein 1-like [Nasonia vitripennis]
c107685.graph_c0	0.000235149	2.06313	up	--	--	--	--	--
c107682.graph_c1	0.00331642	-2.3272	down	--	Biological Process: mRNA splicing, via spliceosome (GO:0000398);; Cellular Component: spliceosomal complex (GO:0005681);;	--	--	PREDICTED: uncharacterized protein LOC100120328 [Nasonia vitripennis]
c107666.graph_c0	3.91204e-27	-5.04109	down	General function prediction only	--	--	Homeobox protein Wariai GN=warA OS=Dictyostelium discoideum (Slime mold) PE=2 SV=1	PREDICTED: delta-latroinsectotoxin-Lt1a-like [Nasonia vitripennis]
c107661.graph_c0	0.00928673	-1.58517	down	Signal transduction mechanisms	Molecular Function: phosphoprotein phosphatase activity (GO:0004721);;	K15498|0|nvi:100120045|serine/threonine-protein phosphatase 6 catalytic subunit; K15498 serine/threonine-protein phosphatase 6 catalytic subunit [EC:3.1.3.16] (A)	Serine/threonine-protein phosphatase 6 catalytic subunit GN=PpV OS=Drosophila melanogaster (Fruit fly) PE=2 SV=1	PREDICTED: serine/threonine-protein phosphatase 6 catalytic subunit [Nasonia vitripennis]
c107660.graph_c1	0.000619918	-2.34722	down	--	--	K16459|0|nvi:100123822|centrosomal protein of 120 kDa-like; K16459 centrosomal protein CEP120 (A)	--	PREDICTED: centrosomal protein of 120 kDa-like [Nasonia vitripennis]
c107656.graph_c0	0.000177592	-1.8301	down	--	--	--	--	PREDICTED: uncharacterized protein LOC100115922 isoform X4 [Nasonia vitripennis]
c107655.graph_c0	0.00557518	1.43687	up	--	Biological Process: lipid transport (GO:0006869);;	--	Oxysterol-binding protein 11 GN=osbK OS=Dictyostelium discoideum (Slime mold) PE=3 SV=1	PREDICTED: oxysterol-binding protein-related protein 2 isoform X1 [Nasonia vitripennis]
c107645.graph_c0	0.00643658	-1.35183	down	Cell wall/membrane/envelope biogenesis	Molecular Function: transferase activity (GO:0016740);;	--	--	PREDICTED: uncharacterized protein LOC100118136 [Nasonia vitripennis]
c107625.graph_c1	2.53006e-32	-7.18409	down	--	--	K18621|6.44125e-123|nvi:100117378|probable GPI-anchored adhesin-like protein PGA55; K18621 actin-binding protein anillin (A)	--	PREDICTED: probable GPI-anchored adhesin-like protein PGA55 [Nasonia vitripennis]
c107625.graph_c0	1.11838e-28	-7.76125	down	--	--	K18621|4.72401e-161|nvi:100117378|probable GPI-anchored adhesin-like protein PGA55; K18621 actin-binding protein anillin (A)	Actin-binding protein anillin GN=scra OS=Drosophila melanogaster (Fruit fly) PE=1 SV=3	PREDICTED: probable GPI-anchored adhesin-like protein PGA55 [Nasonia vitripennis]
c107621.graph_c0	0.00565276	-1.34968	down	--	--	--	DEP domain-containing protein DDB_G0279099 GN=DDB_G0279099 OS=Dictyostelium discoideum (Slime mold) PE=3 SV=1	PREDICTED: DEP domain-containing protein 5 isoform X5 [Nasonia vitripennis]
c107618.graph_c0	0.00992923	1.4155	up	--	Molecular Function: potassium channel activity (GO:0005267);; Cellular Component: integral component of membrane (GO:0016021);; Biological Process: potassium ion transmembrane transport (GO:0071805);;	K04922|2.49288e-151|nvi:100122054|Kcnk13; potassium channel, subfamily K, member 13; K04922 potassium channel subfamily K member 13 (A)	Two pore potassium channel protein sup-9 OS=Caenorhabditis elegans PE=1 SV=2	PREDICTED: potassium channel subfamily K member 13 [Nasonia vitripennis]
c107609.graph_c1	0.000442913	-2.71477	down	--	Molecular Function: ubiquitin-protein transferase activity (GO:0004842);; Biological Process: protein ubiquitination (GO:0016567);;	K10581|0|ame:724799|GB12148; uncharacterized LOC724799; K10581 ubiquitin-conjugating enzyme E2 O [EC:6.3.2.19] (A)	--	PREDICTED: ubiquitin-conjugating enzyme E2 O-like isoform X1 [Apis dorsata]
c107609.graph_c0	0.00883794	-1.25994	down	Posttranslational modification, protein turnover, chaperones	Molecular Function: acid-amino acid ligase activity (GO:0016881);;	K10581|0|ame:724799|GB12148; uncharacterized LOC724799; K10581 ubiquitin-conjugating enzyme E2 O [EC:6.3.2.19] (A)	Probable ubiquitin-conjugating enzyme protein 17 GN=ubc-17 OS=Caenorhabditis elegans PE=3 SV=3	PREDICTED: ubiquitin-conjugating enzyme E2 O-like isoform X1 [Apis mellifera]
c107588.graph_c1	0.00789855	-1.62888	down	--	Molecular Function: protein serine/threonine kinase activity (GO:0004674);; Molecular Function: ATP binding (GO:0005524);; Molecular Function: phospholipid binding (GO:0005543);; Biological Process: protein phosphorylation (GO:0006468);; Molecular Function: Rho GTPase binding (GO:0017048);; Biological Process: intracellular signal transduction (GO:0035556);; Molecular Function: metal ion binding …	K17388|0|nvi:100119770|rho-associated protein kinase 2; K17388 Rho-associated protein kinase 2 [EC:2.7.11.1] (A)	Rho-associated protein kinase let-502 {ECO:0000250|UniProtKB:P92199, ECO:0000250|UniProtKB:Q13464} OS=Caenorhabditis briggsae PE=3 SV=2	PREDICTED: rho-associated protein kinase 2 isoform X5 [Nasonia vitripennis]
c107586.graph_c0	4.55198e-06	-10.2602	down	--	--	--	--	endonuclease-like venom protein precursor [Nasonia vitripennis]
c107582.graph_c1	0.00187611	1.62025	up	Lipid transport and metabolism	--	--	Esterase B1 (Precursor) GN=B1 OS=Culex pipiens (House mosquito) PE=3 SV=1	carboxylesterase clade A, member 9 [Nasonia vitripennis]
c107574.graph_c1	3.395e-14	-3.74523	down	Cytoskeleton	Molecular Function: nucleotide binding (GO:0000166);; Cellular Component: microtubule cytoskeleton (GO:0015630);; Cellular Component: protein complex (GO:0043234);; Cellular Component: cytoskeletal part (GO:0044430);; Biological Process: single-organism cellular process (GO:0044763);;	K10402|0|nvi:100115522|kinesin-A; kinesin A; K10402 kinesin family member 20 (A)	Kinesin-like protein subito GN=sub OS=Drosophila melanogaster (Fruit fly) PE=1 SV=1	PREDICTED: kinesin-like protein KIF20A isoform X1 [Nasonia vitripennis]
c107572.graph_c1	0.00277411	1.83693	up	--	--	--	--	--
c107572.graph_c0	0.00587451	1.37006	up	--	--	--	--	--
c107571.graph_c1	3.47287e-09	-3.55694	down	Cytoskeleton	Molecular Function: nucleotide binding (GO:0000166);; Cellular Component: microtubule cytoskeleton (GO:0015630);; Cellular Component: protein complex (GO:0043234);; Cellular Component: cytoskeletal part (GO:0044430);;	K10401|0|nvi:100678398|kinesin-like protein KIF18A; K10401 kinesin family member 18/19 (A)	Kinesin-related protein 10 GN=kif10 OS=Dictyostelium discoideum (Slime mold) PE=3 SV=1	PREDICTED: kinesin-like protein KIF18A isoform X1 [Nasonia vitripennis]
c107569.graph_c1	1.36334e-08	-2.83087	down	--	--	--	--	--
c107568.graph_c0	1.4367e-06	-5.79807	down	Signal transduction mechanisms	Molecular Function: calcium-dependent protein serine/threonine phosphatase activity (GO:0004723);; Molecular Function: calmodulin binding (GO:0005516);; Cellular Component: calcineurin complex (GO:0005955);; Biological Process: protein dephosphorylation (GO:0006470);; Biological Process: female meiotic division (GO:0007143);; Biological Process: embryo development (GO:0009790);; Biological Proces…	--	Serine/threonine-protein phosphatase 2B catalytic subunit 2 GN=Pp2B-14D OS=Drosophila melanogaster (Fruit fly) PE=1 SV=2	PREDICTED: serine/threonine-protein phosphatase 2B catalytic subunit 1-like isoform X1 [Nasonia vitripennis]
c107545.graph_c0	0.000387476	1.69756	up	--	--	--	Brain peptide ITGQGNRIF (Precursor) OS=Apis mellifera (Honeybee) PE=1 SV=1	PREDICTED: prohormone-3-like [Nasonia vitripennis]
c107541.graph_c0	0.00013035	-1.96442	down	--	Molecular Function: organic cyclic compound binding (GO:0097159);; Molecular Function: heterocyclic compound binding (GO:1901363);;	K17573|0|nvi:100116303|meiosis arrest female protein 1; K17573 meiosis arrest female protein 1 (A)	--	PREDICTED: meiosis arrest female protein 1 isoform X1 [Harpegnathos saltator]
c107540.graph_c4	0.00474915	3.47051	up	--	--	--	--	--
c107536.graph_c0	1.09573e-05	-8.93729	down	--	--	--	--	endonuclease-like venom protein precursor [Nasonia vitripennis]
c107535.graph_c1	0.00374306	-1.65009	down	--	--	--	SUN domain-containing protein 2 (Precursor) GN=sun2 OS=Dictyostelium discoideum (Slime mold) PE=3 SV=1	PREDICTED: SUN domain-containing ossification factor isoform X1 [Nasonia vitripennis]
c107534.graph_c2	0.000816338	-1.86017	down	--	Cellular Component: integral component of membrane (GO:0016021);;	--	--	PREDICTED: transmembrane protein 205 [Nasonia vitripennis]
c107521.graph_c0	5.13861e-06	-5.09616	down	--	--	--	--	PREDICTED: uncharacterized protein C1orf112 homolog isoform X2 [Nasonia vitripennis]
c107520.graph_c0	1.48309e-05	-1.96541	down	General function prediction only	Cellular Component: nucleus (GO:0005634);; Biological Process: intracellular protein transport (GO:0006886);; Molecular Function: Ran GTPase binding (GO:0008536);;	K14289|0|nvi:100115945|exportin-5; K14289 exportin-5 (A)	Exportin-5 GN=xpo5 OS=Dictyostelium discoideum (Slime mold) PE=3 SV=1	PREDICTED: exportin-5 [Nasonia vitripennis]
c107519.graph_c0	6.28442e-05	-3.23022	down	--	Molecular Function: zinc ion binding (GO:0008270);;	K11485|0|ame:413288|Pcl, GB16657; polycomblike; K11485 polycomb-like protein 2 (A)	Polycomb protein Pcl GN=Pcl OS=Drosophila melanogaster (Fruit fly) PE=1 SV=2	PREDICTED: polycomb protein Pcl-like [Megachile rotundata]
c107517.graph_c3	0.00776221	1.29197	up	--	--	--	--	--
c107494.graph_c0	0.000192642	-2.91818	down	--	--	--	--	--
c107482.graph_c0	0.000882567	-1.63319	down	Transcription	Molecular Function: sequence-specific DNA binding transcription factor activity (GO:0003700);; Biological Process: regulation of transcription, DNA-templated (GO:0006355);; Molecular Function: zinc ion binding (GO:0008270);; Molecular Function: sequence-specific DNA binding (GO:0043565);;	--	GATA-binding factor A GN=pnr OS=Drosophila melanogaster (Fruit fly) PE=1 SV=1	PREDICTED: siderophore biosynthesis regulatory protein URBS1-like isoform X1 [Nasonia vitripennis]
c107477.graph_c0	3.93496e-15	-6.9792	down	--	Molecular Function: binding (GO:0005488);;	--	--	hypothetical protein TcasGA2_TC001839 [Tribolium castaneum]
c107457.graph_c0	0.00191134	-1.63796	down	--	--	--	--	PREDICTED: putative GPI-anchored protein PB15E9.01c [Nasonia vitripennis]
c107452.graph_c0	2.69677e-07	-5.06088	down	--	--	--	--	--
c107450.graph_c0	3.71415e-05	-3.16811	down	--	--	K14693|0|nvi:100120479|zinc transporter 6-like; K14693 solute carrier family 30 (zinc transporter), member 6 (A)	Probable zinc transporter protein DDB_G0269332 GN=DDB_G0269332 OS=Dictyostelium discoideum (Slime mold) PE=3 SV=1	PREDICTED: zinc transporter 6-like [Nasonia vitripennis]
c107435.graph_c0	0.00863343	-1.28339	down	Cell cycle control, cell division, chromosome partitioning	--	--	G2/mitotic-specific cyclin-B3 GN=CycB3 OS=Drosophila melanogaster (Fruit fly) PE=1 SV=1	PREDICTED: run domain Beclin-1 interacting and cysteine-rich containing protein isoform X1 [Nasonia vitripennis]
c107423.graph_c0	0.00489394	3.03363	up	--	--	--	--	--
c107418.graph_c4	0.00270943	-1.65875	down	--	--	K06237|0|nvi:100119790|collagen alpha-2(IV) chain; K06237 collagen, type IV, alpha (A)	Collagen alpha-1(IV) chain (Precursor) GN=Cg25C OS=Drosophila melanogaster (Fruit fly) PE=2 SV=3	PREDICTED: LOW QUALITY PROTEIN: collagen alpha-2(IV) chain [Nasonia vitripennis]
c107418.graph_c2	0.00687199	-1.86044	down	--	--	--	Transcription factor Adf-1 GN=Adf1 OS=Drosophila melanogaster (Fruit fly) PE=2 SV=2	PREDICTED: glutamic acid-rich protein-like isoform X1 [Nasonia vitripennis]
c107416.graph_c0	1.99193e-05	-2.3517	down	Replication, recombination and repair	Molecular Function: hydrolase activity (GO:0016787);; Molecular Function: organic cyclic compound binding (GO:0097159);; Molecular Function: heterocyclic compound binding (GO:1901363);;	K18408|0|nvi:100115305|probable ATP-dependent RNA helicase spindle-E; K18408 ATP-dependent RNA helicase TDRD9 [EC:3.6.4.13] (A)	Probable ATP-dependent RNA helicase spindle-E GN=spn-E OS=Culex quinquefasciatus (Southern house mosquito) PE=3 SV=1	PREDICTED: probable ATP-dependent RNA helicase spindle-E [Nasonia vitripennis]
c107414.graph_c0	0.000620585	-1.98852	down	--	--	K16725|0|nvi:100679288|uncharacterized LOC100679288; K16725 centrosomal protein CEP192 (A)	3&apos;-5&apos; exonuclease eri-1 GN=eri-1 OS=Caenorhabditis elegans PE=1 SV=2	PREDICTED: uncharacterized protein LOC100679288 [Nasonia vitripennis]
c107391.graph_c0	0.000404823	-2.53847	down	--	--	--	--	PREDICTED: zinc finger protein Xfin-like [Nasonia vitripennis]
c107381.graph_c2	5.1973e-16	-6.4531	down	--	--	--	--	PREDICTED: uncharacterized protein DDB_G0271670-like [Nasonia vitripennis]
c107381.graph_c1	1.48884e-08	-6.254	down	--	--	--	--	PREDICTED: uncharacterized protein DDB_G0271670-like [Nasonia vitripennis]
c107381.graph_c0	9.62921e-25	-7.06247	down	--	--	--	--	PREDICTED: uncharacterized protein LOC100678599 [Nasonia vitripennis]
c107380.graph_c0	0.00764846	-3.96063	down	--	--	--	--	PREDICTED: claspin homolog [Nasonia vitripennis]
c107359.graph_c1	4.87009e-05	-2.58483	down	--	--	K03155|0|ame:550811|Tim2, GB13318; timeout; K03155 timeless (A)	Protein timeless GN=tim OS=Drosophila virilis (Fruit fly) PE=2 SV=1	PREDICTED: protein timeless homolog isoform X1 [Apis dorsata]
c107338.graph_c0	0.00757682	-2.03715	down	--	--	--	--	PREDICTED: uncharacterized protein LOC100678302 [Nasonia vitripennis]
c107330.graph_c0	4.08971e-31	-6.55788	down	--	Biological Process: response to stimulus (GO:0050896);;	K18809|0|nvi:100120990|toll2; toll-like receptor 2; K18809 protein toll (A)	Protein toll (Precursor) GN=Tl OS=Drosophila melanogaster (Fruit fly) PE=1 SV=1	PREDICTED: protein toll [Nasonia vitripennis]
c107321.graph_c1	0.00211337	2.47113	up	Replication, recombination and repair	Molecular Function: catalytic activity (GO:0003824);;	--	Endonuclease GN=pol OS=Drosophila melanogaster (Fruit fly) PE=3 SV=1	integrase [Tribolium castaneum]
c107318.graph_c0	2.45972e-06	4.86982	up	--	--	--	--	PREDICTED: uncharacterized protein LOC100679596 [Nasonia vitripennis]
c107317.graph_c0	9.70194e-05	-1.90156	down	--	Biological Process: intracellular protein transport (GO:0006886);; Cellular Component: Golgi transport complex (GO:0017119);;	--	Conserved oligomeric Golgi complex subunit 7 GN=Cog7 OS=Drosophila melanogaster (Fruit fly) PE=2 SV=2	PREDICTED: conserved oligomeric Golgi complex subunit 7 isoform X2 [Nasonia vitripennis]
c107311.graph_c0	1.19128e-06	-4.06052	down	--	--	--	--	PREDICTED: uncharacterized protein LOC103317251 [Nasonia vitripennis]
c107279.graph_c0	0.000311994	-2.62138	down	--	Molecular Function: zinc ion binding (GO:0008270);;	--	--	PREDICTED: zinc finger SWIM domain-containing protein KIAA0913-like [Bombus impatiens]
c107262.graph_c0	2.1283e-19	-5.89808	down	--	--	--	--	PREDICTED: uncharacterized protein LOC100120239 isoform X1 [Nasonia vitripennis]
c107245.graph_c0	0.000666348	1.64223	up	--	--	--	--	--
c107234.graph_c1	0.00038687	-3.41674	down	--	--	--	--	--
c107231.graph_c1	1.06918e-05	-3.31762	down	--	Molecular Function: NAD+ ADP-ribosyltransferase activity (GO:0003950);;	K10799|1.15964e-166|nvi:100124046|tankyrase; K10799 tankyrase [EC:2.4.2.30] (A)	Tankyrase OS=Drosophila melanogaster (Fruit fly) PE=1 SV=1	PREDICTED: tankyrase isoform X3 [Nasonia vitripennis]
c107230.graph_c0	0.0051547	-2.23354	down	--	--	--	Probable tyrosyl-DNA phosphodiesterase GN=gkt OS=Drosophila melanogaster (Fruit fly) PE=2 SV=1	PREDICTED: probable tyrosyl-DNA phosphodiesterase isoform X1 [Nasonia vitripennis]
c107217.graph_c0	0.000153063	-1.97619	down	--	--	--	--	PREDICTED: lipoma HMGIC fusion partner-like 3 protein [Nasonia vitripennis]
c107191.graph_c1	0.000200352	-2.34665	down	--	--	K14972|5.14492e-34|nvi:100118595|PAX-interacting protein 1; K14972 PAX-interacting protein 1 (A)	--	PREDICTED: PAX-interacting protein 1 [Nasonia vitripennis]
c107181.graph_c0	2.04855e-05	-2.26623	down	--	--	K14794|0|nvi:100123074|RRP12-like protein; K14794 ribosomal RNA-processing protein 12 (A)	RRP12-like protein GN=CG2691 OS=Drosophila melanogaster (Fruit fly) PE=1 SV=2	PREDICTED: RRP12-like protein [Nasonia vitripennis]
c107159.graph_c2	0.00924381	1.35109	up	--	--	--	--	--
c107159.graph_c1	1.8025e-05	2.03187	up	--	Molecular Function: phosphoprotein phosphatase activity (GO:0004721);; Biological Process: protein dephosphorylation (GO:0006470);;	--	--	PREDICTED: uncharacterized protein LOC100677900 isoform X1 [Nasonia vitripennis]
c107152.graph_c0	0.00217354	-1.83894	down	--	--	--	--	PREDICTED: uncharacterized protein LOC100679804 isoform X2 [Nasonia vitripennis]
c107127.graph_c0	5.27006e-06	-4.18441	down	Lipid transport and metabolism	--	--	Venom carboxylesterase-6 (Precursor) OS=Apis mellifera (Honeybee) PE=2 SV=1	PREDICTED: venom carboxylesterase-6 [Nasonia vitripennis]
c107118.graph_c0	0.00932617	-1.41516	down	--	--	--	--	PREDICTED: DNA-binding protein RFX7 [Nasonia vitripennis]
c107101.graph_c1	1.22452e-09	-2.9565	down	--	--	K03233|0|nvi:100120958|microtubule-associated protein futsch; K03233 elongation factor 1-gamma (A)	--	PREDICTED: microtubule-associated protein futsch isoform X1 [Nasonia vitripennis]
c107098.graph_c1	9.10773e-05	-3.44513	down	--	--	--	--	--
c107090.graph_c1	0.000215739	-3.52869	down	--	Molecular Function: serine-type peptidase activity (GO:0008236);;	--	Serine protease easter (Precursor) GN=ea OS=Drosophila melanogaster (Fruit fly) PE=1 SV=3	PREDICTED: LOW QUALITY PROTEIN: serine protease easter-like [Nasonia vitripennis]
c107069.graph_c0	0.000761345	-1.98601	down	--	Cellular Component: membrane (GO:0016020);; Molecular Function: transmembrane transporter activity (GO:0022857);; Biological Process: single-organism transport (GO:0044765);;	--	Facilitated trehalose transporter Tret1 {ECO:0000303|PubMed:20035867} OS=Bombyx mori (Silk moth) PE=1 SV=1	PREDICTED: facilitated trehalose transporter Tret1-like [Nasonia vitripennis]
c107068.graph_c1	0.00251867	-2.58943	down	Replication, recombination and repair	Molecular Function: DNA binding (GO:0003677);; Molecular Function: DNA helicase activity (GO:0003678);; Molecular Function: ATP binding (GO:0005524);; Biological Process: DNA replication initiation (GO:0006270);; Biological Process: DNA duplex unwinding (GO:0032508);; Cellular Component: MCM complex (GO:0042555);;	K02212|6.31084e-178|nvi:100124268|DNA replication licensing factor MCM4; K02212 DNA replication licensing factor MCM4 [EC:3.6.4.12] (A)	DNA replication licensing factor MCM4 GN=dpa OS=Drosophila melanogaster (Fruit fly) PE=1 SV=2	PREDICTED: DNA replication licensing factor MCM4 [Nasonia vitripennis]
c107068.graph_c0	6.40783e-05	-2.80871	down	Replication, recombination and repair	Molecular Function: DNA binding (GO:0003677);; Molecular Function: ATP binding (GO:0005524);; Cellular Component: nucleus (GO:0005634);; Biological Process: DNA replication initiation (GO:0006270);; Biological Process: mitotic spindle organization (GO:0007052);; Biological Process: DNA duplex unwinding (GO:0032508);; Biological Process: DNA endoreduplication (GO:0042023);; Cellular Component: MCM…	K02212|0|nvi:100124268|DNA replication licensing factor MCM4; K02212 DNA replication licensing factor MCM4 [EC:3.6.4.12] (A)	DNA replication licensing factor MCM4 GN=dpa OS=Drosophila melanogaster (Fruit fly) PE=1 SV=2	PREDICTED: DNA replication licensing factor MCM4 [Nasonia vitripennis]
c107014.graph_c2	0.00870497	-1.96836	down	General function prediction only	--	--	Transcription factor hamlet GN=ham OS=Drosophila melanogaster (Fruit fly) PE=2 SV=1	PREDICTED: PR domain zinc finger protein 16-like isoform X3 [Nasonia vitripennis]
c107010.graph_c2	0.00324987	-1.86919	down	--	--	K16749|0|nvi:100119413|Bardet-Biedl syndrome 7 protein homolog; K16749 Bardet-Biedl syndrome 7 protein (A)	--	PREDICTED: Bardet-Biedl syndrome 7 protein homolog [Nasonia vitripennis]
c107008.graph_c1	0.0087456	3.07124	up	--	--	--	--	hypothetical protein SINV_02721 [Solenopsis invicta]
c107000.graph_c0	0.00980876	1.28235	up	--	--	--	Protein roadkill GN=rdx OS=Drosophila melanogaster (Fruit fly) PE=1 SV=2	PREDICTED: BTB/POZ domain protein isoform X2 [Nasonia vitripennis]
c106992.graph_c0	0.00102828	-2.37638	down	--	--	--	--	--
c106973.graph_c0	0.000143438	-3.00657	down	--	Molecular Function: catalytic activity (GO:0003824);;	--	Serine protease nudel (Precursor) GN=ndl OS=Drosophila melanogaster (Fruit fly) PE=1 SV=2	PREDICTED: serine protease nudel-like [Nasonia vitripennis]
c106930.graph_c2	6.552e-07	-2.30744	down	--	Biological Process: cell adhesion (GO:0007155);; Cellular Component: integral component of membrane (GO:0016021);;	--	Sensory neuron membrane protein 2 {ECO:0000312|EMBL:AAG49365.1} OS=Manduca sexta (Tobacco hawkmoth) PE=2 SV=1	PREDICTED: scavenger receptor class B member 1-like isoform X2 [Nasonia vitripennis]
c106915.graph_c1	0.000476506	-1.62221	down	Carbohydrate transport and metabolism	Molecular Function: catalytic activity (GO:0003824);; Biological Process: metabolic process (GO:0008152);;	K00615|0|nvi:100115215|transketolase; K00615 transketolase [EC:2.2.1.1] (A)	Histone H2B GN=AGAP012894 OS=Anopheles gambiae (African malaria mosquito) PE=2 SV=5	PREDICTED: transketolase isoform X2 [Nasonia vitripennis]
c106915.graph_c0	3.8753e-09	-2.62609	down	Carbohydrate transport and metabolism	Molecular Function: catalytic activity (GO:0003824);; Biological Process: metabolic process (GO:0008152);;	K00615|5.10035e-134|nvi:100115215|transketolase; K00615 transketolase [EC:2.2.1.1] (A)	Transketolase GN=tkt-2 OS=Dictyostelium discoideum (Slime mold) PE=1 SV=1	PREDICTED: transketolase isoform X2 [Nasonia vitripennis]
c106910.graph_c0	0.00706889	-1.83839	down	Energy production and conversion	--	K16474|0|nvi:100120509|intraflagellar transport protein 88 homolog; K16474 intraflagellar transport protein 88 (A)	Aldehyde dehydrogenase GN=ALDH OS=Enchytraeus buchholzi (Grindal worm) PE=2 SV=1	PREDICTED: intraflagellar transport protein 88 homolog isoform X2 [Nasonia vitripennis]
c106902.graph_c0	0.00210256	1.52766	up	--	Molecular Function: ionotropic glutamate receptor activity (GO:0004970);; Molecular Function: extracellular-glutamate-gated ion channel activity (GO:0005234);; Cellular Component: plasma membrane (GO:0005886);; Biological Process: ion transport (GO:0006811);; Cellular Component: integral component of membrane (GO:0016021);; Cellular Component: cell junction (GO:0030054);; Biological Process: iono…	--	--	PREDICTED: glutamate receptor, ionotropic kainate 2-like [Bombus impatiens]
c106898.graph_c0	1.69123e-07	-3.97249	down	--	--	--	--	PREDICTED: uncharacterized protein PF11_0213-like isoform X1 [Nasonia vitripennis]
c106890.graph_c3	0.00674399	1.74877	up	--	--	--	--	--
c106888.graph_c0	1.49785e-05	-2.52384	down	--	--	--	--	PREDICTED: uncharacterized protein LOC100679804 isoform X1 [Nasonia vitripennis]
c106882.graph_c0	0.000109476	-1.97974	down	--	Cellular Component: integral component of membrane (GO:0016021);; Biological Process: transmembrane transport (GO:0055085);;	--	UNC93-like protein GN=CG4928 OS=Drosophila melanogaster (Fruit fly) PE=2 SV=1	UNC93-like protein [Harpegnathos saltator]
c106879.graph_c0	0.00568051	-1.37331	down	--	--	K18723|1.17931e-141|ame:412950|nucleoporin GLE1; K18723 nucleoporin GLE1 (A)	Nucleoporin GLE1 GN=GLE1 OS=Drosophila melanogaster (Fruit fly) PE=2 SV=1	PREDICTED: nucleoporin GLE1 [Harpegnathos saltator]
c106868.graph_c0	1.17105e-06	-2.28761	down	Nucleotide transport and metabolism	Molecular Function: formate-tetrahydrofolate ligase activity (GO:0004329);; Molecular Function: methylenetetrahydrofolate dehydrogenase (NADP+) activity (GO:0004488);; Molecular Function: ATP binding (GO:0005524);; Biological Process: folic acid-containing compound biosynthetic process (GO:0009396);; Biological Process: oxidation-reduction process (GO:0055114);;	K00288|0|ame:550749|pug, GB13160; c-1-tetrahydrofolate synthase, cytoplasmic; K00288 methylenetetrahydrofolate dehydrogenase (NADP+) / methenyltetrahydrofolate cyclohydrolase / formyltetrahydrofolate synthetase [EC:1.5.1.5 3.5.4.9 6.3.4.3] (A)	Formyltetrahydrofolate synthetase GN=pug OS=Drosophila melanogaster (Fruit fly) PE=1 SV=4	PREDICTED: c-1-tetrahydrofolate synthase, cytoplasmic-like [Megachile rotundata]
c106867.graph_c0	4.41233e-06	-3.58107	down	--	--	--	--	--
c106858.graph_c0	0.000658126	-2.1718	down	--	Molecular Function: dopamine beta-monooxygenase activity (GO:0004500);; Molecular Function: copper ion binding (GO:0005507);; Biological Process: catecholamine metabolic process (GO:0006584);; Biological Process: oxidation-reduction process (GO:0055114);;	--	MOXD1 homolog 1 (Precursor) GN=CG5235 OS=Drosophila melanogaster (Fruit fly) PE=2 SV=2	PREDICTED: MOXD1 homolog 1 [Nasonia vitripennis]
c106846.graph_c1	0.00888258	1.35424	up	--	--	--	--	PREDICTED: dentin sialophosphoprotein-like isoform X2 [Nasonia vitripennis]
c106836.graph_c0	2.76653e-07	-3.18034	down	--	--	--	--	PREDICTED: uncharacterized protein LOC100677951 isoform X1 [Nasonia vitripennis]
c106830.graph_c3	0.00325101	-3.25015	down	--	--	--	--	--
c106830.graph_c1	0.000448205	-1.83621	down	--	--	--	Pupal cuticle protein 20 (Precursor) GN=PCP20 OS=Manduca sexta (Tobacco hawkmoth) PE=1 SV=1	PREDICTED: uncharacterized protein LOC100679581 isoform X1 [Nasonia vitripennis]
c106811.graph_c3	1.0016e-07	-7.05005	down	--	--	--	--	PREDICTED: uncharacterized protein LOC100678142 [Nasonia vitripennis]
c106811.graph_c0	5.19962e-48	-8.25329	down	General function prediction only	--	--	Alpha-latrocrustotoxin-Lt1a (Precursor; Fragment) OS=Latrodectus tredecimguttatus (Mediterranean black widow spider) PE=2 SV=2	PREDICTED: ankyrin-1-like [Nasonia vitripennis]
c106801.graph_c0	0.00208922	-1.62406	down	--	--	--	G-protein coupled receptor GRL101 (Precursor) OS=Lymnaea stagnalis (Great pond snail) PE=2 SV=1	PREDICTED: decorin [Nasonia vitripennis]
c106793.graph_c0	8.32396e-06	-2.16092	down	--	--	K11124|0|nvi:100678183|telomerase-binding protein EST1A; K11124 protein SMG6 [EC:3.1.-.-] (A)	--	PREDICTED: telomerase-binding protein EST1A [Nasonia vitripennis]
c106788.graph_c1	5.21591e-06	-2.22943	down	General function prediction only	Molecular Function: binding (GO:0005488);;	--	Protein suppressor of hairy wing GN=su(Hw) OS=Drosophila melanogaster (Fruit fly) PE=1 SV=2	PREDICTED: LOW QUALITY PROTEIN: transcriptional repressor CTCFL-like [Nasonia vitripennis]
c106786.graph_c0	0.00117912	1.53225	up	--	--	--	Fibulin-1 (Precursor) GN=fbl-1 OS=Caenorhabditis elegans PE=1 SV=3	PREDICTED: uncharacterized protein LOC102681549 isoform X3 [Apis dorsata]
c106782.graph_c0	0.00509893	1.67713	up	--	--	--	--	--
c106772.graph_c1	7.36536e-05	-3.21493	down	--	Molecular Function: Rho guanyl-nucleotide exchange factor activity (GO:0005089);; Molecular Function: phospholipid binding (GO:0005543);; Biological Process: regulation of Rho protein signal transduction (GO:0035023);;	K16529|0|nvi:100121921|rho guanine nucleotide exchange factor 28; K16529 A-kinase anchor protein 13 (A)	Protein vav GN=Vav OS=Drosophila melanogaster (Fruit fly) PE=1 SV=2	PREDICTED: rho guanine nucleotide exchange factor 28 isoform X2 [Nasonia vitripennis]
c106772.graph_c0	0.00863272	-1.83883	down	--	--	--	--	--
c106771.graph_c0	4.43129e-06	-3.23119	down	--	Molecular Function: DNA binding (GO:0003677);; Molecular Function: protein dimerization activity (GO:0046983);;	K09067|0|nvi:100115092|probable serine/threonine-protein kinase DDB_G0282963; K09067 achaete-scute complex protein (A)	Achaete-scute complex protein T5 GN=ac OS=Drosophila melanogaster (Fruit fly) PE=2 SV=1	PREDICTED: probable serine/threonine-protein kinase DDB_G0282963 [Nasonia vitripennis]
c106756.graph_c3	2.75637e-06	-2.57062	down	--	--	--	--	PREDICTED: microtubule-associated protein futsch-like isoform X4 [Nasonia vitripennis]
c106746.graph_c1	0.00482013	-1.53213	down	--	Molecular Function: protein serine/threonine kinase activity (GO:0004674);; Molecular Function: ATP binding (GO:0005524);; Biological Process: protein phosphorylation (GO:0006468);;	--	Probable inactive serine/threonine-protein kinase bub1 GN=bub1 OS=Dictyostelium discoideum (Slime mold) PE=3 SV=1	PREDICTED: mediator of RNA polymerase II transcription subunit 12 [Nasonia vitripennis]
c106746.graph_c0	2.62073e-10	-4.29835	down	--	Molecular Function: GTPase activator activity (GO:0005096);; Cellular Component: intracellular (GO:0005622);; Biological Process: positive regulation of GTPase activity (GO:0043547);; Biological Process: regulation of small GTPase mediated signal transduction (GO:0051056);; Molecular Function: organic cyclic compound binding (GO:0097159);; Molecular Function: heterocyclic compound binding (GO:190…	K05767|0|nvi:100119792|IQGAP2; ras GTPase-activating-like protein IQGAP1; K05767 Ras GTPase-activating-like protein IQGAP2/3 (A)	Ras GTPase-activating-like protein rgaA GN=rgaA OS=Dictyostelium discoideum (Slime mold) PE=1 SV=1	PREDICTED: ras GTPase-activating-like protein IQGAP1 [Nasonia vitripennis]
c106713.graph_c0	0.000470474	-1.64932	down	--	Biological Process: metabolic process (GO:0008152);; Molecular Function: transferase activity (GO:0016740);;	K00665|0|nvi:100122099|fatty acid synthase-like; K00665 fatty acid synthase, animal type [EC:2.3.1.85] (A)	Probable polyketide synthase 6 GN=pks6 OS=Dictyostelium discoideum (Slime mold) PE=3 SV=1	PREDICTED: fatty acid synthase-like isoform X1 [Nasonia vitripennis]
c106707.graph_c0	0.00863343	2.22917	up	--	--	--	--	--
c106685.graph_c1	0.00327461	-2.24489	down	--	--	--	--	PREDICTED: probable GPI-anchored adhesin-like protein PGA55 [Nasonia vitripennis]
c106649.graph_c2	2.30087e-08	-3.36919	down	--	--	--	--	PREDICTED: girdin-like [Nasonia vitripennis]
c106649.graph_c0	1.19495e-06	-4.10686	down	--	--	--	--	PREDICTED: protein Daple-like [Bombus impatiens]
c106644.graph_c1	0.000666592	-3.3415	down	--	--	--	--	--
c106621.graph_c0	8.3042e-05	-2.66064	down	--	--	--	Adult enhancer factor 1 GN=Aef1 OS=Drosophila melanogaster (Fruit fly) PE=2 SV=1	PREDICTED: zinc finger protein 652-like isoform X2 [Nasonia vitripennis]
c106612.graph_c0	4.11443e-10	-5.00308	down	--	--	--	E3 ubiquitin-protein ligase siah-1 {ECO:0000250|UniProtKB:Q965X6} OS=Caenorhabditis briggsae PE=3 SV=2	PREDICTED: uncharacterized protein LOC100680278 [Nasonia vitripennis]
c106611.graph_c0	0.00514737	-1.51446	down	--	--	--	Protein transport protein Sec16 GN=sec-16 OS=Caenorhabditis elegans PE=3 SV=1	PREDICTED: uncharacterized protein LOC100121224 isoform X6 [Nasonia vitripennis]
c106607.graph_c2	0.00054584	-2.31589	down	--	Biological Process: signal transduction (GO:0007165);;	--	Hemolin (Precursor) OS=Hyalophora cecropia (Cecropia moth) PE=1 SV=2	PREDICTED: single Ig IL-1-related receptor-like [Nasonia vitripennis]
c106579.graph_c1	7.07105e-06	-4.23502	down	--	--	--	--	--
c106579.graph_c0	5.82082e-19	-5.12101	down	--	--	K07831|1.13876e-56|nvi:100117915|uncharacterized LOC100117915; K07831 Ras-related protein M-Ras (A)	--	PREDICTED: uncharacterized protein LOC100117915 [Nasonia vitripennis]
c106577.graph_c0	0.000107475	-2.19565	down	--	Molecular Function: nucleic acid binding (GO:0003676);; Molecular Function: sequence-specific DNA binding transcription factor activity (GO:0003700);; Cellular Component: nucleus (GO:0005634);; Biological Process: regulation of transcription, DNA-templated (GO:0006355);; Molecular Function: zinc ion binding (GO:0008270);;	K12236|0|nvi:100116742|protein shuttle craft; K12236 transcriptional repressor NF-X1 [EC:6.3.2.-] (A)	Protein shuttle craft GN=stc OS=Drosophila melanogaster (Fruit fly) PE=1 SV=2	PREDICTED: protein shuttle craft [Nasonia vitripennis]
c106574.graph_c0	0.000619785	-7.8355	down	Lipid transport and metabolism	--	--	Nose resistant to fluoxetine protein 6 (Precursor) GN=nrf-6 OS=Caenorhabditis elegans PE=1 SV=3	PREDICTED: nose resistant to fluoxetine protein 6-like [Nasonia vitripennis]
c106549.graph_c1	0.00222801	1.51666	up	--	--	--	--	--
c106540.graph_c1	2.13637e-06	-7.85852	down	--	--	--	--	endonuclease-like venom protein precursor [Nasonia vitripennis]
c106540.graph_c0	6.37867e-07	-9.06638	down	--	--	--	--	endonuclease-like venom protein precursor [Nasonia vitripennis]
c106521.graph_c0	0.000198839	-1.91822	down	--	Molecular Function: calcium ion binding (GO:0005509);; Cellular Component: plasma membrane (GO:0005886);; Biological Process: homophilic cell adhesion via plasma membrane adhesion molecules (GO:0007156);; Cellular Component: integral component of membrane (GO:0016021);;	--	DE-cadherin (Precursor) GN=shg OS=Drosophila melanogaster (Fruit fly) PE=1 SV=2	PREDICTED: DE-cadherin [Nasonia vitripennis]
c106514.graph_c0	1.01113e-10	-4.12487	down	--	Molecular Function: nucleic acid binding (GO:0003676);; Molecular Function: ATP binding (GO:0005524);; Molecular Function: ATP-dependent helicase activity (GO:0008026);;	K13982|0|nvi:100120300|vas; ATP-dependent RNA helicase vasa, isoform A; K13982 probable ATP-dependent RNA helicase DDX4 [EC:3.6.4.13] (A)	ATP-dependent RNA helicase vasa, isoform A GN=vas OS=Drosophila melanogaster (Fruit fly) PE=1 SV=3	PREDICTED: ATP-dependent RNA helicase vasa, isoform A isoform X2 [Nasonia vitripennis]
c106498.graph_c0	0.00325049	3.38696	up	--	--	--	--	--
c106492.graph_c0	0.00271836	-2.04672	down	Inorganic ion transport and metabolism	Cellular Component: membrane (GO:0016020);;	--	Sodium/potassium/calcium exchanger Nckx30C GN=Nckx30C OS=Drosophila melanogaster (Fruit fly) PE=2 SV=4	PREDICTED: sodium/potassium/calcium exchanger 3-like isoform X1 [Nasonia vitripennis]
c106483.graph_c0	3.11098e-06	-3.19861	down	--	Molecular Function: receptor activity (GO:0004872);; Biological Process: receptor-mediated endocytosis (GO:0006898);;	--	Vitellogenin receptor {ECO:0000312|EMBL:AAP92450.1} (Precursor) OS=Solenopsis invicta (Red imported fire ant) PE=2 SV=1	PREDICTED: vitellogenin receptor isoform X1 [Nasonia vitripennis]
c106473.graph_c0	1.02743e-05	-2.51776	down	--	--	--	--	PREDICTED: probable protein phosphatase DDB_G0282105 [Microplitis demolitor]
c106461.graph_c1	6.86074e-06	-2.63262	down	Amino acid transport and metabolism	Biological Process: metabolic process (GO:0008152);; Molecular Function: transaminase activity (GO:0008483);; Molecular Function: pyridoxal phosphate binding (GO:0030170);;	K00819|3.16298e-53|nvi:100119896|ornithine aminotransferase, mitochondrial-like; K00819 ornithine--oxo-acid transaminase [EC:2.6.1.13] (A)	Ornithine aminotransferase, mitochondrial (Precursor) GN=Oat OS=Drosophila ananassae (Fruit fly) PE=1 SV=1	PREDICTED: ornithine aminotransferase, mitochondrial-like [Nasonia vitripennis]
c106460.graph_c1	0.000323281	1.70974	up	--	--	--	--	--
c106446.graph_c0	0.000152453	1.76301	up	--	--	--	--	--
c106445.graph_c0	0.00156714	-2.30834	down	--	--	--	--	PREDICTED: uncharacterized protein LOC100123177 [Nasonia vitripennis]
c106443.graph_c2	0.00597828	2.20369	up	--	--	--	--	--
c106443.graph_c0	0.00121607	-1.64005	down	Energy production and conversion	Molecular Function: magnesium ion binding (GO:0000287);; Molecular Function: isocitrate dehydrogenase (NADP+) activity (GO:0004450);; Biological Process: tricarboxylic acid cycle (GO:0006099);; Biological Process: isocitrate metabolic process (GO:0006102);; Molecular Function: NAD binding (GO:0051287);;	K00031|3.60258e-79|nvi:100122999|isocitrate dehydrogenase [NADP] cytoplasmic; K00031 isocitrate dehydrogenase [EC:1.1.1.42] (A)	Isocitrate dehydrogenase [NADP], mitochondrial (Precursor) GN=idhM OS=Dictyostelium discoideum (Slime mold) PE=3 SV=1	PREDICTED: isocitrate dehydrogenase [NADP] cytoplasmic [Nasonia vitripennis]
c106433.graph_c0	0.00227066	2.21563	up	--	--	--	--	--
c106412.graph_c0	0.00684421	2.09914	up	--	Molecular Function: calcium ion binding (GO:0005509);;	--	Calmodulin OS=Strongylocentrotus intermedius (Sea urchin) PE=2 SV=3	calmodulin-like [Nasonia vitripennis]
c106394.graph_c2	4.39212e-16	-3.63304	down	--	Molecular Function: oxidoreductase activity (GO:0016491);; Molecular Function: metal ion binding (GO:0046872);;	K15001|1.91428e-97|nvi:100113546|CYP4G44; cytochrome P450 4G44; K15001 cytochrome P450, family 4 [EC:1.14.-.-] (A)	Cytochrome P450 4g15 GN=Cyp4g15 OS=Drosophila melanogaster (Fruit fly) PE=2 SV=1	cytochrome P450 4G44 [Nasonia vitripennis]
c106379.graph_c1	0.000393135	-1.67815	down	Defense mechanisms	Molecular Function: nucleotide binding (GO:0000166);; Biological Process: transport (GO:0006810);; Biological Process: cellular process (GO:0009987);; Molecular Function: ATPase activity (GO:0016887);;	K05673|0|nvi:100115935|probable multidrug resistance-associated protein lethal(2)03659; K05673 ATP-binding cassette, subfamily C (CFTR/MRP), member 4 (A)	Probable multidrug resistance-associated protein lethal(2)03659 GN=l(2)03659 OS=Drosophila melanogaster (Fruit fly) PE=2 SV=3	PREDICTED: probable multidrug resistance-associated protein lethal(2)03659 isoform X2 [Nasonia vitripennis]
c106363.graph_c0	0.00607722	-1.36587	down	--	Molecular Function: protein serine/threonine kinase activity (GO:0004674);; Molecular Function: ATP binding (GO:0005524);; Biological Process: protein phosphorylation (GO:0006468);;	K08853|0|nvi:100118474|AP2-associated protein kinase 1-like; K08853 AP2-associated kinase [EC:2.7.11.1] (A)	Probable serine/threonine-protein kinase DDB_G0276461 GN=DDB_G0276461 OS=Dictyostelium discoideum (Slime mold) PE=3 SV=1	PREDICTED: uncharacterized protein LOC105192384 isoform X1 [Harpegnathos saltator]
c106358.graph_c3	0.00121486	-1.47371	down	--	Molecular Function: nucleotide binding (GO:0000166);; Molecular Function: nucleic acid binding (GO:0003676);; Biological Process: mRNA processing (GO:0006397);; Molecular Function: metal ion binding (GO:0046872);;	K13192|0|nvi:100115800|RNA-binding protein 27; K13192 RNA-binding protein 26 (A)	--	PREDICTED: RNA-binding protein 27 isoform X3 [Nasonia vitripennis]
c106358.graph_c2	7.68672e-08	-2.36715	down	--	Molecular Function: organic cyclic compound binding (GO:0097159);; Molecular Function: heterocyclic compound binding (GO:1901363);;	K13192|6.53986e-119|ame:409915|swm, GB15526; second mitotic wave missing; K13192 RNA-binding protein 26 (A)	--	PREDICTED: RNA-binding protein 26 isoform X2 [Apis mellifera]
c106313.graph_c0	4.40026e-13	-8.32693	down	General function prediction only	Molecular Function: binding (GO:0005488);;	--	Protein krueppel (Fragment) GN=Kr OS=Manduca sexta (Tobacco hawkmoth) PE=2 SV=1	GE20038 [Drosophila yakuba]
c106308.graph_c0	4.66667e-10	-3.79796	down	General function prediction only	Molecular Function: NAD+ ADP-ribosyltransferase activity (GO:0003950);;	K10799|0|nvi:100124046|tankyrase; K10799 tankyrase [EC:2.4.2.30] (A)	Tankyrase OS=Drosophila melanogaster (Fruit fly) PE=1 SV=1	PREDICTED: tankyrase isoform X2 [Nasonia vitripennis]
c106297.graph_c1	0.000847272	-3.84094	down	--	--	--	--	--
c106290.graph_c0	5.30547e-38	-8.21287	down	Replication, recombination and repair	--	K14079|0|nvi:100122324|poly(A) RNA polymerase gld-2 homolog A-like; K14079 poly(A) RNA polymerase GLD2 [EC:2.7.7.19] (A)	Poly(A) RNA polymerase gld-2 homolog A GN=Gld2 OS=Drosophila melanogaster (Fruit fly) PE=1 SV=3	PREDICTED: poly(A) RNA polymerase gld-2 homolog A-like isoform X2 [Nasonia vitripennis]
c106275.graph_c2	5.47511e-15	-7.80624	down	Chromatin structure and dynamics	Cellular Component: nucleosome (GO:0000786);; Molecular Function: DNA binding (GO:0003677);; Cellular Component: nucleus (GO:0005634);; Biological Process: nucleosome assembly (GO:0006334);; Molecular Function: protein heterodimerization activity (GO:0046982);;	K11253|2.02244e-50|mgp:100542975|histone H3-like; K11253 histone H3 (A)	Histone H3 OS=Urechis caupo (Innkeeper worm) PE=1 SV=2	histone H3, partial [Conothele sp. MY2070]
c106269.graph_c1	0.00814274	-2.24652	down	--	Cellular Component: integral component of membrane (GO:0016021);;	--	Protein pecanex GN=pcx OS=Drosophila melanogaster (Fruit fly) PE=2 SV=3	PREDICTED: pecanex-like protein 3 isoform X2 [Nasonia vitripennis]
c106249.graph_c0	0.000228833	-2.68818	down	--	--	--	--	PREDICTED: uncharacterized protein LOC100678128 [Nasonia vitripennis]
c106239.graph_c0	2.07938e-07	-4.07002	down	Carbohydrate transport and metabolism	Molecular Function: binding (GO:0005488);; Biological Process: carbohydrate metabolic process (GO:0005975);; Molecular Function: mannosidase activity (GO:0015923);;	K12311|0|nvi:100120019|lysosomal alpha-mannosidase-like; K12311 lysosomal alpha-mannosidase [EC:3.2.1.24] (A)	Alpha-mannosidase 58 kDa subunit (Precursor) GN=manA OS=Dictyostelium discoideum (Slime mold) PE=1 SV=2	PREDICTED: lysosomal alpha-mannosidase-like isoform X2 [Nasonia vitripennis]
c106230.graph_c0	2.06045e-05	-3.22887	down	Carbohydrate transport and metabolism	Biological Process: metabolic process (GO:0008152);; Molecular Function: hydrolase activity, acting on glycosyl bonds (GO:0016798);;	--	Maltase 1 (Precursor) GN=Mal-B1 OS=Drosophila virilis (Fruit fly) PE=3 SV=2	PREDICTED: maltase 1-like [Nasonia vitripennis]
c106226.graph_c1	9.3618e-07	-3.29905	down	Signal transduction mechanisms	Molecular Function: nucleotide binding (GO:0000166);; Biological Process: cyclic nucleotide biosynthetic process (GO:0009190);; Molecular Function: phosphorus-oxygen lyase activity (GO:0016849);; Biological Process: intracellular signal transduction (GO:0035556);;	K08049|0|nvi:100119583|adenylate cyclase type 9; K08049 adenylate cyclase 9 [EC:4.6.1.1] (A)	Ca(2+)/calmodulin-responsive adenylate cyclase GN=rut OS=Drosophila melanogaster (Fruit fly) PE=1 SV=2	PREDICTED: adenylate cyclase type 9 isoform X1 [Nasonia vitripennis]
c106197.graph_c1	0.00660906	-2.42554	down	--	--	K10736|1.0861e-164|nvi:100121444|protein MCM10 homolog; K10736 minichromosome maintenance protein 10 (A)	Protein MCM10 homolog GN=Mcm10 OS=Drosophila melanogaster (Fruit fly) PE=1 SV=2	PREDICTED: protein MCM10 homolog [Nasonia vitripennis]
c106185.graph_c0	0.000193656	-1.72392	down	--	--	--	--	PREDICTED: probable GPI-anchored adhesin-like protein PGA55 isoform X3 [Nasonia vitripennis]
c106184.graph_c0	0.000361212	-3.06432	down	--	--	--	--	--
c106174.graph_c0	0.0030807	1.52584	up	--	--	--	--	--
c106167.graph_c2	0.00500984	-2.96303	down	--	--	--	--	PREDICTED: claspin homolog [Nasonia vitripennis]
c106167.graph_c0	7.41068e-06	-4.36078	down	--	--	--	Claspin homolog GN=CG32251 OS=Drosophila melanogaster (Fruit fly) PE=1 SV=1	PREDICTED: claspin homolog [Nasonia vitripennis]
c106162.graph_c0	8.18385e-11	-4.15866	down	--	--	--	--	PREDICTED: muscle M-line assembly protein unc-89-like isoform X2 [Nasonia vitripennis]
c106144.graph_c0	4.62301e-32	-6.4915	down	--	Molecular Function: oxidoreductase activity (GO:0016491);;	--	Phenoloxidase 2 (Precursor) GN=PPO2 OS=Drosophila melanogaster (Fruit fly) PE=1 SV=1	PREDICTED: phenoloxidase subunit A3-like [Megachile rotundata]
c106143.graph_c0	4.59373e-09	-3.467	down	Secondary metabolites biosynthesis, transport and catabolism	--	--	--	PREDICTED: laccase-1-like [Nasonia vitripennis]
c106139.graph_c0	0.00682155	-2.19492	down	--	Molecular Function: sequence-specific DNA binding transcription factor activity (GO:0003700);; Cellular Component: nucleus (GO:0005634);; Biological Process: regulation of transcription, DNA-templated (GO:0006355);; Molecular Function: zinc ion binding (GO:0008270);; Molecular Function: sequence-specific DNA binding (GO:0043565);;	K09378|0|nvi:100116002|zinc finger homeobox protein 4; K09378 AT-binding transcription factor 1 (A)	Zinc finger protein 2 GN=zfh2 OS=Drosophila melanogaster (Fruit fly) PE=1 SV=2	PREDICTED: zinc finger homeobox protein 4 [Nasonia vitripennis]
c106138.graph_c0	1.94978e-09	-2.76379	down	General function prediction only	--	K10727|0|nvi:100120348|DNA replication factor Cdt1; K10727 chromatin licensing and DNA replication factor 1 (A)	N-alpha-acetyltransferase 20 GN=nat5 OS=Dictyostelium discoideum (Slime mold) PE=3 SV=2	PREDICTED: DNA replication factor Cdt1 [Nasonia vitripennis]
c106119.graph_c0	1.47439e-42	-6.99172	down	Secondary metabolites biosynthesis, transport and catabolism	Molecular Function: NADPH:quinone reductase activity (GO:0003960);; Molecular Function: [acyl-carrier-protein] S-acetyltransferase activity (GO:0004313);; Molecular Function: 3-oxoacyl-[acyl-carrier-protein] reductase (NADPH) activity (GO:0004316);; Molecular Function: 3-hydroxypalmitoyl-[acyl-carrier-protein] dehydratase activity (GO:0004317);; Molecular Function: enoyl-[acyl-carrier-protein] re…	K00665|0|nvi:100122083|fatty acid synthase-like; K00665 fatty acid synthase, animal type [EC:2.3.1.85] (A)	Chalcone synthase stlA GN=stlA OS=Dictyostelium discoideum (Slime mold) PE=1 SV=1	PREDICTED: fatty acid synthase-like [Nasonia vitripennis]
c106117.graph_c0	0.00645021	1.63724	up	--	--	--	RNA-directed DNA polymerase from mobile element jockey GN=pol OS=Drosophila melanogaster (Fruit fly) PE=1 SV=1	putative reverse transcriptase-1 [Microplitis demolitor]
c106098.graph_c0	0.00351837	-2.27502	down	--	--	--	Protein lap1 GN=let-413 OS=Caenorhabditis elegans PE=1 SV=3	PREDICTED: leucine-rich repeat protein SHOC-2-like [Nasonia vitripennis]
c106078.graph_c1	0.00883611	1.47361	up	--	--	--	--	--
c106039.graph_c2	0.00795676	-2.64543	down	--	--	--	--	PREDICTED: uncharacterized protein LOC100877540 [Megachile rotundata]
c106039.graph_c1	0.00812945	-1.74803	down	--	--	--	--	--
c106039.graph_c0	6.38012e-05	-2.64288	down	--	--	--	--	PREDICTED: uncharacterized protein DDB_G0271670 [Nasonia vitripennis]
c106031.graph_c0	0.00501518	1.44317	up	--	Molecular Function: GABA-A receptor activity (GO:0004890);; Molecular Function: extracellular ligand-gated ion channel activity (GO:0005230);; Cellular Component: plasma membrane (GO:0005886);; Biological Process: ion transport (GO:0006811);; Cellular Component: integral component of membrane (GO:0016021);; Cellular Component: cell junction (GO:0030054);; Cellular Component: postsynaptic membrane…	K05195|0|nvi:100116668|Rdl, Rdlac, Rdlbd; GABA-gated chloride channel Rdl; K05195 glycine receptor alpha-3 (A)	Gamma-aminobutyric acid receptor subunit beta (Precursor) OS=Musca domestica (House fly) PE=1 SV=2	GABA-gated chloride channel [Nasonia vitripennis]
c106026.graph_c0	0.00462857	-4.03805	down	--	--	--	--	PiggyBac transposable element-derived protein 4 [Camponotus floridanus]
c106015.graph_c0	0.00143444	-1.50671	down	Secondary metabolites biosynthesis, transport and catabolism	Molecular Function: monooxygenase activity (GO:0004497);; Molecular Function: protein kinase activity (GO:0004672);; Molecular Function: iron ion binding (GO:0005506);; Molecular Function: ATP binding (GO:0005524);; Biological Process: protein phosphorylation (GO:0006468);; Molecular Function: electron carrier activity (GO:0009055);; Molecular Function: oxidoreductase activity, acting on paired d…	K10723|0|nvi:100115247|CYP314A1; cytochrome P450 314A1; K10723 ecdysone 20-monooxygenase [EC:1.14.99.22] (A)	Ecdysone 20-monooxygenase (Precursor) GN=shd OS=Drosophila melanogaster (Fruit fly) PE=1 SV=3	cytochrome P450 314A1 isoform 1 [Nasonia vitripennis]
c106010.graph_c0	4.62538e-11	-5.66057	down	--	Molecular Function: binding (GO:0005488);;	--	--	PREDICTED: longitudinals lacking protein, isoforms A/B/D/L isoform X41 [Solenopsis invicta]
c106008.graph_c0	0.000392454	1.74401	up	--	--	--	--	PREDICTED: formin-binding protein 1-like isoform X2 [Nasonia vitripennis]
c105990.graph_c1	2.31634e-05	-5.69872	down	General function prediction only	Molecular Function: sequence-specific DNA binding RNA polymerase II transcription factor activity (GO:0000981);; Molecular Function: nucleic acid binding (GO:0003676);; Cellular Component: nucleus (GO:0005634);; Biological Process: regulation of transcription from RNA polymerase II promoter (GO:0006357);; Biological Process: regulation of development, heterochronic (GO:0040034);; Molecular Functi…	K09213|9.34947e-135|nvi:100101931|Hb; hunchback; K09213 hunchback (A)	Protein hunchback (Fragment) GN=hb OS=Bombyx mori (Silk moth) PE=2 SV=1	PREDICTED: uncharacterized protein LOC100878050 [Megachile rotundata]
c105990.graph_c0	5.70926e-12	-4.64791	down	--	Molecular Function: sequence-specific DNA binding RNA polymerase II transcription factor activity (GO:0000981);; Molecular Function: DNA binding (GO:0003677);; Cellular Component: nucleus (GO:0005634);; Biological Process: regulation of transcription from RNA polymerase II promoter (GO:0006357);; Biological Process: segmentation (GO:0035282);; Biological Process: regulation of development, hetero…	K09213|8.56184e-22|nvi:100101931|Hb; hunchback; K09213 hunchback (A)	Protein hunchback GN=hb OS=Tribolium castaneum (Red flour beetle) PE=3 SV=2	PREDICTED: uncharacterized protein LOC100878050 [Megachile rotundata]
c105989.graph_c6	0.000847272	2.01324	up	--	--	--	--	--
c105984.graph_c0	9.53564e-09	-6.71969	down	--	Molecular Function: cytokine activity (GO:0005125);; Cellular Component: extracellular space (GO:0005615);; Molecular Function: growth factor activity (GO:0008083);; Biological Process: growth (GO:0040007);;	--	Protein 60A (Precursor) GN=gbb OS=Drosophila virilis (Fruit fly) PE=3 SV=1	PREDICTED: bone morphogenetic protein 7 [Nasonia vitripennis]
c105982.graph_c1	4.41453e-17	-8.96469	down	--	--	--	--	--
c105978.graph_c0	0.000276394	-2.58265	down	--	--	--	--	--
c105972.graph_c0	0.005445	-1.70321	down	--	--	--	--	PREDICTED: myb-like protein X [Nasonia vitripennis]
c105957.graph_c0	0.0028348	-1.40578	down	Lipid transport and metabolism	--	--	Venom carboxylesterase-6 (Precursor) OS=Apis mellifera (Honeybee) PE=2 SV=1	PREDICTED: venom carboxylesterase-6 [Nasonia vitripennis]
c105938.graph_c0	6.18461e-05	-3.04829	down	--	--	--	--	uncharacterized protein LOC100233148 [Nasonia vitripennis]
c105925.graph_c0	0.000141206	-2.08675	down	--	Molecular Function: protein serine/threonine kinase activity (GO:0004674);; Molecular Function: protein tyrosine kinase activity (GO:0004713);; Molecular Function: ATP binding (GO:0005524);; Cellular Component: centriole (GO:0005814);; Biological Process: protein phosphorylation (GO:0006468);;	K08863|0|nvi:100115256|Plk4, SAK; polo-like kinase 4 (EC:2.7.11.21); K08863 polo-like kinase 4 [EC:2.7.11.21] (A)	Serine/threonine-protein kinase PLK4 GN=SAK OS=Culex quinquefasciatus (Southern house mosquito) PE=3 SV=1	polo-like kinase 4 [Nasonia vitripennis]
c105909.graph_c2	0.000204287	1.9136	up	--	--	--	--	--
c105909.graph_c0	0.000623514	2.38434	up	--	--	--	--	--
c105906.graph_c0	0.000375447	1.58777	up	--	--	--	--	--
c105902.graph_c0	0.00430091	-2.841	down	--	--	--	Protein SGT1 homolog ecdysoneless GN=ecd OS=Drosophila melanogaster (Fruit fly) PE=1 SV=1	PREDICTED: protein SGT1 homolog ecdysoneless [Nasonia vitripennis]
c105901.graph_c3	0.000276491	-1.85757	down	General function prediction only	Molecular Function: binding (GO:0005488);;	--	Protein-cysteine N-palmitoyltransferase Rasp GN=rasp OS=Drosophila melanogaster (Fruit fly) PE=2 SV=1	PREDICTED: zinc finger protein 37 homolog isoform X1 [Nasonia vitripennis]
c105893.graph_c0	0.00110596	-1.82969	down	Secondary metabolites biosynthesis, transport and catabolism	Molecular Function: monooxygenase activity (GO:0004497);; Molecular Function: iron ion binding (GO:0005506);; Molecular Function: electron carrier activity (GO:0009055);; Molecular Function: oxidoreductase activity, acting on paired donors, with incorporation or reduction of molecular oxygen (GO:0016705);; Molecular Function: heme binding (GO:0020037);; Biological Process: oxidation-reduction pro…	K14999|0|nvi:100114023|CYP6BC2; probable cytochrome P450 6a13; K14999 cytochrome P450, family 6 [EC:1.14.-.-] (A)	Probable cytochrome P450 6a14 GN=Cyp6a14 OS=Drosophila melanogaster (Fruit fly) PE=3 SV=2	PREDICTED: probable cytochrome P450 6a13 [Nasonia vitripennis]
c105888.graph_c3	0.00491712	2.21192	up	--	--	--	--	--
c105888.graph_c2	0.00448547	1.49561	up	--	--	--	--	--
c105888.graph_c0	0.00279621	2.18477	up	--	--	--	--	--
c105836.graph_c2	8.21631e-43	-7.19732	down	--	Molecular Function: DNA binding (GO:0003677);;	--	Protein tramtrack, beta isoform GN=ttk OS=Drosophila melanogaster (Fruit fly) PE=1 SV=2	PREDICTED: uncharacterized protein LOC100116237 isoform X2 [Nasonia vitripennis]
c105836.graph_c0	1.41491e-34	-6.98489	down	--	Molecular Function: DNA binding (GO:0003677);;	--	--	PREDICTED: uncharacterized protein LOC100116237 isoform X6 [Nasonia vitripennis]
c105818.graph_c0	2.22736e-10	-3.68218	down	--	Molecular Function: kinase activity (GO:0016301);;	K06641|0|nvi:100117742|serine/threonine-protein kinase Chk2; K06641 serine/threonine-protein kinase Chk2 [EC:2.7.11.1] (A)	Ovarian-specific serine/threonine-protein kinase Lok GN=lok OS=Drosophila melanogaster (Fruit fly) PE=2 SV=1	PREDICTED: serine/threonine-protein kinase Chk2 [Nasonia vitripennis]
c105796.graph_c0	0.00503866	-1.60547	down	Replication, recombination and repair	Molecular Function: DNA binding (GO:0003677);; Molecular Function: DNA helicase activity (GO:0003678);; Molecular Function: CTP synthase activity (GO:0003883);; Molecular Function: ATP binding (GO:0005524);; Cellular Component: nucleus (GO:0005634);; Biological Process: pyrimidine nucleotide biosynthetic process (GO:0006221);; Biological Process: DNA replication initiation (GO:0006270);; Biologic…	K02540|0|nvi:100120235|DNA replication licensing factor Mcm2; K02540 DNA replication licensing factor MCM2 [EC:3.6.4.12] (A)	DNA replication licensing factor Mcm2 GN=Mcm2 OS=Drosophila melanogaster (Fruit fly) PE=1 SV=1	PREDICTED: DNA replication licensing factor Mcm2 [Nasonia vitripennis]
c105769.graph_c0	0.000765198	2.55818	up	--	--	--	--	--
c105765.graph_c1	0.00200043	1.71901	up	--	--	--	--	--
c105763.graph_c0	2.24519e-13	-4.78824	down	--	--	--	--	PREDICTED: uncharacterized protein DDB_G0280579-like [Nasonia vitripennis]
c105756.graph_c0	0.00655617	-1.57915	down	--	--	--	Neprilysin-21 GN=nep-21 OS=Caenorhabditis elegans PE=1 SV=2	PREDICTED: uncharacterized protein LOC100123612 [Nasonia vitripennis]
c105749.graph_c0	2.07797e-06	Inf	up	--	--	--	--	PREDICTED: uncharacterized protein LOC100115767 [Nasonia vitripennis]
c105741.graph_c0	2.08578e-11	-6.75264	down	--	--	--	Krueppel homolog 1 GN=Kr-h1 OS=Drosophila melanogaster (Fruit fly) PE=2 SV=2	PREDICTED: uncharacterized protein LOC103315472 isoform X1 [Nasonia vitripennis]
c105740.graph_c0	8.79296e-07	-3.53746	down	--	--	K13755|0|ame:724389|Pde1c, GB13690; phosphodiesterase 1c; K13755 calcium/calmodulin-dependent 3',5'-cyclic nucleotide phosphodiesterase [EC:3.1.4.17] (A)	Probable 3&apos;,5&apos;-cyclic phosphodiesterase pde-1 GN=pde-1 OS=Caenorhabditis elegans PE=3 SV=2	PREDICTED: calcium/calmodulin-dependent 3&apos;,5&apos;-cyclic nucleotide phosphodiesterase 1A isoform X5 [Nasonia vitripennis]
c105737.graph_c0	0.00687279	-2.05882	down	--	--	--	Interference hedgehog {ECO:0000250|UniProtKB:Q9VM64} (Precursor) OS=Drosophila sechellia (Fruit fly) PE=3 SV=1	PREDICTED: interference hedgehog-like isoform X1 [Nasonia vitripennis]
c105731.graph_c0	4.01628e-06	-7.27409	down	--	--	--	--	PREDICTED: uncharacterized protein LOC100123806 [Nasonia vitripennis]
c105723.graph_c2	0.000385679	1.64962	up	--	--	--	--	--
c105723.graph_c0	1.93831e-06	2.22521	up	--	--	--	--	--
c105711.graph_c0	0.00878979	-1.27071	down	--	Molecular Function: nucleic acid binding (GO:0003676);; Molecular Function: zinc ion binding (GO:0008270);; Molecular Function: ligase activity (GO:0016874);;	K16064|0|nvi:100123699|E3 SUMO-protein ligase PIAS2; K16064 E3 SUMO-protein ligase PIAS3 [EC:6.3.2.-] (A)	Acetylcholine receptor subunit beta-like 2 (Precursor) GN=CG6798 OS=Drosophila melanogaster (Fruit fly) PE=2 SV=3	PREDICTED: E3 SUMO-protein ligase PIAS2 isoform X6 [Nasonia vitripennis]
c105690.graph_c0	5.06445e-19	-6.73748	down	--	Molecular Function: translation elongation factor activity (GO:0003746);; Biological Process: translational elongation (GO:0006414);; Biological Process: positive regulation of transcription elongation from RNA polymerase II promoter (GO:0032968);;	K15172|0|nvi:100115818|transcription elongation factor SPT5-like; K15172 transcription elongation factor SPT5 (A)	Transcription elongation factor SPT5 GN=Spt5 OS=Drosophila melanogaster (Fruit fly) PE=1 SV=1	PREDICTED: transcription elongation factor SPT5-like [Nasonia vitripennis]
c105681.graph_c0	7.71415e-05	3.87614	up	--	--	--	Limulus clotting factor C chain B (Precursor) OS=Carcinoscorpius rotundicauda (Mangrove horseshoe crab) PE=2 SV=1	PREDICTED: limulus clotting factor C [Nasonia vitripennis]
c105616.graph_c0	0.000495925	1.77883	up	--	--	--	--	PREDICTED: uncharacterized protein LOC100114177 [Nasonia vitripennis]
c105615.graph_c0	5.26874e-08	-2.79642	down	Amino acid transport and metabolism	Molecular Function: alanine-glyoxylate transaminase activity (GO:0008453);;	K00827|1.15376e-126|nvi:100123739|alanine--glyoxylate aminotransferase 2, mitochondrial; K00827 alanine-glyoxylate transaminase / (R)-3-amino-2-methylpropionate-pyruvate transaminase [EC:2.6.1.44 2.6.1.40] (A)	Alanine--glyoxylate aminotransferase 2-like GN=CG8745 OS=Drosophila melanogaster (Fruit fly) PE=2 SV=2	PREDICTED: alanine--glyoxylate aminotransferase 2, mitochondrial [Nasonia vitripennis]
c105599.graph_c0	0.00573323	1.52822	up	--	--	--	--	PREDICTED: trichohyalin-like [Nasonia vitripennis]
c105598.graph_c0	2.51936e-05	-1.93181	down	Carbohydrate transport and metabolism	Molecular Function: beta-N-acetylhexosaminidase activity (GO:0004563);; Biological Process: carbohydrate metabolic process (GO:0005975);;	K12373|0|nvi:100115732|beta-hexosaminidase subunit beta-like; K12373 hexosaminidase [EC:3.2.1.52] (A)	Beta-hexosaminidase A (Precursor) OS=Caenorhabditis briggsae PE=3 SV=2	PREDICTED: beta-hexosaminidase subunit beta-like [Nasonia vitripennis]
c105597.graph_c5	0.00577389	1.60882	up	--	--	--	--	--
c105585.graph_c0	1.84366e-05	-3.0099	down	--	Molecular Function: DNA binding (GO:0003677);; Molecular Function: exonuclease activity (GO:0004527);; Molecular Function: iron ion binding (GO:0005506);; Cellular Component: nucleus (GO:0005634);; Biological Process: DNA repair (GO:0006281);; Molecular Function: electron carrier activity (GO:0009055);; Molecular Function: oxidoreductase activity, acting on paired donors, with incorporation or re…	K10746|9.91208e-134|nvi:100119370|exonuclease 1; K10746 exonuclease 1 [EC:3.1.-.-] (A)	Exonuclease 1 GN=tos OS=Drosophila melanogaster (Fruit fly) PE=1 SV=1	PREDICTED: exonuclease 1 [Nasonia vitripennis]
c105569.graph_c1	4.54793e-06	3.96175	up	--	--	--	--	--
c105567.graph_c0	0.00215217	-4.45461	down	--	--	--	--	--
c105542.graph_c0	0.000485984	-2.17219	down	--	--	--	--	PREDICTED: protein PRRC2C isoform X9 [Nasonia vitripennis]
c105539.graph_c1	0.00270659	-1.54895	down	--	--	K18757|0|nvi:100122251|la-related protein 1B; K18757 la-related protein 1 (A)	La-related protein 1 GN=larp OS=Drosophila melanogaster (Fruit fly) PE=1 SV=5	PREDICTED: la-related protein 1B [Nasonia vitripennis]
c105538.graph_c0	0.00878078	-1.98934	down	--	Molecular Function: binding (GO:0005488);; Biological Process: transport (GO:0006810);;	--	Globin OS=Nerita albicilla (Ox-palate nerite) PE=1 SV=1	PREDICTED: globin [Nasonia vitripennis]
c105535.graph_c1	0.00691417	2.22014	up	--	--	--	--	--
c105535.graph_c0	0.00740924	2.99189	up	--	--	--	--	--
c105522.graph_c0	0.0014189	-1.4906	down	--	--	K16518|0|nvi:100117290|KH domain-containing protein C56G2.1; K16518 A-kinase anchor protein 1, mitochondrial (A)	KH domain-containing protein C56G2.1 GN=C56G2.1/C56G2.2 OS=Caenorhabditis elegans PE=3 SV=2	PREDICTED: KH domain-containing protein C56G2.1 [Nasonia vitripennis]
c105515.graph_c0	4.21717e-05	-1.99515	down	--	--	--	--	--
c105508.graph_c0	2.30356e-14	-3.5456	down	--	Molecular Function: sequence-specific DNA binding transcription factor activity (GO:0003700);; Cellular Component: nucleus (GO:0005634);; Biological Process: regulation of transcription, DNA-templated (GO:0006355);; Molecular Function: sequence-specific DNA binding (GO:0043565);;	--	Homeotic protein ocelliless GN=oc OS=Drosophila melanogaster (Fruit fly) PE=2 SV=2	PREDICTED: homeobox protein OTX2 isoform X2 [Nasonia vitripennis]
c105478.graph_c0	0.00138338	-1.63249	down	--	Molecular Function: metalloendopeptidase activity (GO:0004222);; Biological Process: proteolysis (GO:0006508);; Biological Process: integrin-mediated signaling pathway (GO:0007229);; Molecular Function: zinc ion binding (GO:0008270);;	K06704|0|nvi:100117425|disintegrin and metalloproteinase domain-containing protein 10; K06704 disintegrin and metalloproteinase domain-containing protein 10 [EC:3.4.24.81] (A)	ADAM 17-like protease (Precursor) GN=Tace OS=Drosophila melanogaster (Fruit fly) PE=2 SV=2	PREDICTED: disintegrin and metalloproteinase domain-containing protein 10 isoform X1 [Nasonia vitripennis]
c105476.graph_c0	4.77215e-07	-2.86488	down	--	--	--	--	--
c105465.graph_c0	2.54674e-10	-3.7832	down	--	--	--	--	PREDICTED: formin-2 [Nasonia vitripennis]
c105463.graph_c0	0.00327659	-2.32927	down	--	--	--	Neprilysin-21 GN=nep-21 OS=Caenorhabditis elegans PE=1 SV=2	PREDICTED: uncharacterized protein LOC103317074 [Nasonia vitripennis]
c105457.graph_c1	0.000431299	-1.6663	down	General function prediction only	--	K10260|0|nvi:100118356|F-box/WD repeat-containing protein 7; K10260 F-box and WD-40 domain protein 7 (A)	F-box/WD repeat-containing protein 7 OS=Drosophila melanogaster (Fruit fly) PE=1 SV=1	PREDICTED: F-box/WD repeat-containing protein 7 isoform X3 [Nasonia vitripennis]
c105454.graph_c1	1.89935e-05	-3.29656	down	--	--	--	Protein vestigial GN=vg OS=Drosophila melanogaster (Fruit fly) PE=1 SV=1	PREDICTED: protein vestigial-like [Nasonia vitripennis]
c105454.graph_c0	0.000443126	-3.80489	down	--	--	--	--	--
c105442.graph_c0	2.71314e-05	-2.00443	down	--	Biological Process: regulation of cyclin-dependent protein serine/threonine kinase activity (GO:0000079);; Biological Process: regulation of transcription, DNA-templated (GO:0006355);; Molecular Function: protein kinase binding (GO:0019901);;	K15188|0|nvi:100119802|cyclin-T; K15188 cyclin T (A)	Cyclin-T GN=CycT OS=Drosophila melanogaster (Fruit fly) PE=1 SV=2	PREDICTED: cyclin-T [Nasonia vitripennis]
c105436.graph_c0	0.00849357	1.3394	up	--	--	--	--	--
c105432.graph_c0	0.0032149	-2.06428	down	--	Molecular Function: binding (GO:0005488);;	--	--	PREDICTED: E3 ubiquitin-protein ligase RAD18-like [Nasonia vitripennis]
c105421.graph_c0	0.00711774	-5.43775	down	--	--	--	--	--
c105400.graph_c0	2.42151e-05	-3.07558	down	--	--	--	--	PREDICTED: claspin homolog [Nasonia vitripennis]
c105397.graph_c1	0.00907236	-3.2409	down	--	--	--	--	--
c105376.graph_c0	1.8935e-07	-6.45181	down	--	--	--	--	PREDICTED: SET and MYND domain-containing protein 4-like [Nasonia vitripennis]
c105359.graph_c0	4.35025e-19	-4.01499	down	--	--	--	Protein Smaug {ECO:0000250|UniProtKB:Q23972} OS=Drosophila sechellia (Fruit fly) PE=3 SV=1	PREDICTED: protein Smaug homolog 1 [Nasonia vitripennis]
c105354.graph_c1	0.000140262	2.20871	up	--	--	K08220|2.15747e-65|nvi:100120856|feline leukemia virus subgroup C receptor-related protein 2-like; K08220 MFS transporter, FLVCR family, feline leukemia virus subgroup C receptor-related protein (A)	Uncharacterized MFS-type transporter C09D4.1 GN=C09D4.1 OS=Caenorhabditis elegans PE=3 SV=2	PREDICTED: feline leukemia virus subgroup C receptor-related protein 2-like [Bombus terrestris]
c105354.graph_c0	0.0030378	2.32692	up	--	Biological Process: axonal fasciculation (GO:0007413);; Biological Process: dendrite development (GO:0016358);; Biological Process: positive regulation of growth rate (GO:0040010);; Biological Process: locomotion (GO:0040011);; Biological Process: hermaphrodite genitalia development (GO:0040035);;	K08220|4.67922e-17|cel:CELE_C09D4.1|C09D4.1; Protein C09D4.1, isoform B; K08220 MFS transporter, FLVCR family, feline leukemia virus subgroup C receptor-related protein (A)	Uncharacterized MFS-type transporter C09D4.1 GN=C09D4.1 OS=Caenorhabditis elegans PE=3 SV=2	PREDICTED: feline leukemia virus subgroup C receptor-related protein 2-like [Apis florea]
c105342.graph_c3	0.00311652	-1.47634	down	--	--	--	Headcase short protein GN=hdc OS=Drosophila melanogaster (Fruit fly) PE=1 SV=2	PREDICTED: headcase protein isoform X1 [Nasonia vitripennis]
c105342.graph_c1	0.00186273	-2.26211	down	--	--	--	--	--
c105336.graph_c0	3.39892e-07	-2.22743	down	Function unknown	--	K12035|0|ame:724752|GB18033; tripartite motif-containing protein 71-like; K12035 tripartite motif-containing protein 71 [EC:6.3.2.19] (A)	Protein lin-41 GN=lin-41 OS=Caenorhabditis elegans PE=1 SV=1	PREDICTED: LOW QUALITY PROTEIN: tripartite motif-containing protein 71-like [Megachile rotundata]
c105333.graph_c0	0.000151177	-2.68231	down	--	--	K09188|0|nvi:100120205|Trr; histone-lysine N-methyltransferase 2C; K09188 histone-lysine N-methyltransferase MLL3 [EC:2.1.1.43] (A)	Uncharacterized zinc finger protein C28H8.9 GN=C28H8.9/C28H8.10 OS=Caenorhabditis elegans PE=1 SV=2	PREDICTED: histone-lysine N-methyltransferase 2C [Nasonia vitripennis]
c105329.graph_c0	9.96327e-07	-2.42346	down	--	Molecular Function: oxidoreductase activity, acting on single donors with incorporation of molecular oxygen, incorporation of two atoms of oxygen (GO:0016702);;	K10712|4.91591e-105|nvi:100123227|2-aminoethanethiol dioxygenase; K10712 cysteamine dioxygenase [EC:1.13.11.19] (A)	Probable 2-aminoethanethiol dioxygenase GN=ado-2 OS=Dictyostelium discoideum (Slime mold) PE=4 SV=2	PREDICTED: 2-aminoethanethiol dioxygenase isoform X1 [Nasonia vitripennis]
c105317.graph_c1	0.00375301	1.39573	up	--	--	--	--	PREDICTED: anoctamin-8 [Nasonia vitripennis]
c105267.graph_c0	0.000476506	-5.65653	down	--	--	--	--	PREDICTED: uncharacterized protein LOC103317402 isoform X1 [Nasonia vitripennis]
c105256.graph_c0	0.00483146	1.51543	up	--	Molecular Function: binding (GO:0005488);;	--	--	PREDICTED: apolipoprotein D-like [Nasonia vitripennis]
c105250.graph_c0	5.22707e-05	-3.20822	down	--	Biological Process: cell communication (GO:0007154);; Cellular Component: membrane (GO:0016020);; Biological Process: regulation of cellular process (GO:0050794);;	K09255|1.32939e-92|ame:406086|Dl, GB19066, GB19537, GB30211; dorsal; K09255 Rel/ankyrin family, other (A)	Embryonic polarity protein dorsal GN=dl OS=Drosophila melanogaster (Fruit fly) PE=1 SV=2	PREDICTED: putative transcription factor p65 homolog [Megachile rotundata]
c105242.graph_c0	0.00721408	-1.32181	down	--	--	--	--	uncharacterized protein LOC100119622 [Nasonia vitripennis]
c105234.graph_c0	0.000361415	-7.06222	down	--	--	--	--	--
c105175.graph_c0	0.000111729	-2.10173	down	General function prediction only	Molecular Function: GTPase activity (GO:0003924);; Molecular Function: GTP binding (GO:0005525);; Biological Process: GTP catabolic process (GO:0006184);; Biological Process: small GTPase mediated signal transduction (GO:0007264);; Cellular Component: membrane (GO:0016020);;	--	Ras-like protein 3 (Precursor) GN=R OS=Drosophila melanogaster (Fruit fly) PE=2 SV=2	PREDICTED: LOW QUALITY PROTEIN: flocculation protein FLO11-like [Nasonia vitripennis]
c105142.graph_c0	2.2689e-05	-4.6385	down	--	--	--	--	PREDICTED: cation-independent mannose-6-phosphate receptor-like [Nasonia vitripennis]
c105131.graph_c1	0.00306613	1.55996	up	--	--	--	--	--
c105130.graph_c0	1.40277e-11	-6.42456	down	--	--	--	--	PREDICTED: ankyrin repeat and SAM domain-containing protein 6-like [Nasonia vitripennis]
c105129.graph_c1	4.16866e-07	-4.12392	down	--	--	--	--	PREDICTED: uncharacterized protein LOC100116826 [Nasonia vitripennis]
c105126.graph_c0	0.000495545	-2.4907	down	--	--	--	Protein cueball {ECO:0000303|PubMed:8244010} (Precursor) OS=Drosophila melanogaster (Fruit fly) PE=1 SV=1	PREDICTED: protein cueball isoform X3 [Nasonia vitripennis]
c105115.graph_c3	0.00968787	-1.45296	down	Translation, ribosomal structure and biogenesis	Molecular Function: RNA binding (GO:0003723);; Cellular Component: nucleolus (GO:0005730);; Cellular Component: ribosome (GO:0005840);; Molecular Function: zinc ion binding (GO:0008270);; Biological Process: ribosome biogenesis (GO:0042254);;	--	NHP2-like protein 1 homolog GN=hoip OS=Drosophila melanogaster (Fruit fly) PE=2 SV=1	PREDICTED: NHP2-like protein 1-like [Apis mellifera]
c105104.graph_c0	1.81577e-05	-2.06191	down	Cell cycle control, cell division, chromosome partitioning	Cellular Component: nucleus (GO:0005634);; Biological Process: intracellular protein transport (GO:0006886);; Molecular Function: Ran GTPase binding (GO:0008536);;	K18423|0|nvi:100123062|exportin-2; K18423 exportin-2 (importin alpha re-exporter) (A)	Exportin-2 GN=Cas OS=Drosophila melanogaster (Fruit fly) PE=2 SV=2	PREDICTED: exportin-2 [Nasonia vitripennis]
c105087.graph_c0	0.00401312	-1.55663	down	Carbohydrate transport and metabolism	Molecular Function: catalytic activity (GO:0003824);;	K05546|2.83633e-114|nvi:100121937|GANAB; alpha glucosidase II alpha subunit-like; K05546 alpha 1,3-glucosidase [EC:3.2.1.84] (A)	Neutral alpha-glucosidase AB (Precursor) GN=modA OS=Dictyostelium discoideum (Slime mold) PE=3 SV=1	alpha glucosidase II alpha subunit-like precursor [Nasonia vitripennis]
c105084.graph_c3	0.00506013	-5.65857	down	--	Molecular Function: catalytic activity (GO:0003824);; Biological Process: cellular metabolic process (GO:0044237);; Biological Process: primary metabolic process (GO:0044238);; Biological Process: organic substance metabolic process (GO:0071704);;	--	Phospholipase A1 2 OS=Dolichovespula maculata (Bald-faced hornet) PE=1 SV=1	PREDICTED: pancreatic triacylglycerol lipase-like [Nasonia vitripennis]
c105082.graph_c0	0.00438998	1.39067	up	--	--	--	--	--
c105071.graph_c0	0.00331285	2.18051	up	--	--	--	--	--
c105064.graph_c0	3.65526e-18	-4.72029	down	--	--	--	--	--
c105063.graph_c0	0.000761345	-2.32864	down	--	Molecular Function: hydrolase activity, hydrolyzing O-glycosyl compounds (GO:0004553);; Biological Process: carbohydrate metabolic process (GO:0005975);;	--	--	PREDICTED: uncharacterized family 31 glucosidase KIAA1161 [Nasonia vitripennis]
c105062.graph_c0	0.000136872	5.08922	up	--	--	--	Nucleic-acid-binding protein from transposon X-element OS=Drosophila melanogaster (Fruit fly) PE=3 SV=1	PREDICTED: uncharacterized protein LOC100680304 [Nasonia vitripennis]
c105055.graph_c0	0.00259614	-1.62758	down	Secondary metabolites biosynthesis, transport and catabolism	Molecular Function: binding (GO:0005488);; Molecular Function: oxidoreductase activity (GO:0016491);;	K15003|0|nvi:100678179|cytochrome P450 9e2-like; K15003 cytochrome P450, family 9 [EC:1.14.-.-] (A)	Cytochrome P450 9e2 GN=CYP9E2 OS=Blattella germanica (German cockroach) PE=2 SV=1	PREDICTED: cytochrome P450 9e2-like [Nasonia vitripennis]
c105054.graph_c0	2.27799e-39	-9.163	down	--	--	--	--	--
c105053.graph_c1	0.00267996	1.55725	up	--	--	--	--	--
c105051.graph_c0	0.00934779	1.62997	up	--	Molecular Function: transferase activity, transferring glycosyl groups (GO:0016757);;	K00750|0|nvi:100122700|glycogenin-1; K00750 glycogenin glucosyltransferase [EC:2.4.1.186] (A)	Glycogenin-1 {ECO:0000312|WormBase:F56B6.4a} OS=Caenorhabditis elegans PE=1 SV=1	PREDICTED: nucleolar and coiled-body phosphoprotein 1 isoform X2 [Nasonia vitripennis]
c105046.graph_c0	0.00250939	-1.80426	down	Carbohydrate transport and metabolism	Molecular Function: beta-N-acetylhexosaminidase activity (GO:0004563);; Biological Process: carbohydrate metabolic process (GO:0005975);;	K12373|0|nvi:100122289|probable beta-hexosaminidase fdl; K12373 hexosaminidase [EC:3.2.1.52] (A)	Probable beta-hexosaminidase fdl (Precursor) GN=fdl OS=Drosophila melanogaster (Fruit fly) PE=1 SV=1	PREDICTED: probable beta-hexosaminidase fdl [Nasonia vitripennis]
c105043.graph_c1	1.75155e-05	-2.60219	down	--	--	--	Sensory neuron membrane protein 2 {ECO:0000312|EMBL:ADQ73890.1} OS=Ostrinia nubilalis (European corn borer) PE=2 SV=1	PREDICTED: lysosome membrane protein 2-like [Nasonia vitripennis]
c105042.graph_c0	4.85344e-37	-6.29778	down	Secondary metabolites biosynthesis, transport and catabolism	--	K13356|0|nvi:100117801|putative fatty acyl-CoA reductase CG5065; K13356 fatty acyl-CoA reductase [EC:1.2.1.-] (A)	Putative fatty acyl-CoA reductase CG5065 {ECO:0000250|UniProtKB:Q922J9, ECO:0000312|EMBL:AAF57974.1} GN=CG5065 OS=Drosophila melanogaster (Fruit fly) PE=3 SV=1	PREDICTED: putative fatty acyl-CoA reductase CG5065 [Nasonia vitripennis]
c105031.graph_c0	0.000298201	2.4192	up	--	Molecular Function: extracellular ligand-gated ion channel activity (GO:0005230);; Cellular Component: plasma membrane (GO:0005886);; Biological Process: ion transport (GO:0006811);; Cellular Component: integral component of membrane (GO:0016021);; Cellular Component: cell junction (GO:0030054);; Cellular Component: postsynaptic membrane (GO:0045211);;	--	Glutamate-gated chloride channel (Precursor) GN=CG7535 OS=Drosophila melanogaster (Fruit fly) PE=1 SV=2	PREDICTED: glycine receptor subunit alpha-3-like isoform 1 [Megachile rotundata]
c105024.graph_c0	0.00226985	-1.54995	down	--	--	--	O-glucosyltransferase rumi homolog (Precursor) GN=CPIJ013394 OS=Culex quinquefasciatus (Southern house mosquito) PE=3 SV=1	PREDICTED: KDEL motif-containing protein 1-like isoform X1 [Nasonia vitripennis]
c105019.graph_c0	0.000149751	-2.00972	down	--	--	--	--	PREDICTED: inner centromere protein A-like [Nasonia vitripennis]
c105004.graph_c0	0.0067633	1.99921	up	--	--	--	--	--
c104975.graph_c0	0.00150538	-2.67338	down	General function prediction only	Molecular Function: DNA binding (GO:0003677);; Molecular Function: DNA-directed DNA polymerase activity (GO:0003887);; Molecular Function: ATP binding (GO:0005524);; Biological Process: DNA replication (GO:0006260);; Molecular Function: ATP-dependent helicase activity (GO:0008026);;	K02349|0|nvi:100121450|DNA polymerase theta; K02349 DNA polymerase theta [EC:2.7.7.7] (A)	Activating signal cointegrator 1 complex subunit 3-like GN=ascc3l OS=Dictyostelium discoideum (Slime mold) PE=3 SV=1	PREDICTED: DNA polymerase theta [Nasonia vitripennis]
c104966.graph_c0	0.00629146	1.69284	up	--	Molecular Function: bombesin receptor activity (GO:0004946);; Molecular Function: neuropeptide Y receptor activity (GO:0004983);; Cellular Component: integral component of membrane (GO:0016021);; Biological Process: bombesin receptor signaling pathway (GO:0031989);;	K12812|0|nvi:100120748|gastrin-releasing peptide receptor-like; K12812 ATP-dependent RNA helicase UAP56/SUB2 [EC:3.6.4.13] (A)	Allatostatin-A receptor OS=Bombyx mori (Silk moth) PE=2 SV=1	PREDICTED: gastrin-releasing peptide receptor-like [Nasonia vitripennis]
c104951.graph_c0	2.57454e-48	-9.40519	down	--	--	--	--	--
c104945.graph_c0	0.00038687	1.64291	up	--	Biological Process: amino acid transmembrane transport (GO:0003333);; Molecular Function: proline:sodium symporter activity (GO:0005298);; Biological Process: acetylcholine biosynthetic process (GO:0008292);; Molecular Function: choline transmembrane transporter activity (GO:0015220);; Cellular Component: integral component of membrane (GO:0016021);;	K14387|0|nvi:100121508|solute carrier family 5 (choline transporter)-like; K14387 solute carrier family 5 (high affinity choline transporter), member 7 (A)	High-affinity choline transporter 1 GN=CG7708 OS=Drosophila melanogaster (Fruit fly) PE=2 SV=2	High-affinity choline transporter 1 [Acromyrmex echinatior]
c104935.graph_c0	0.00311946	-2.85185	down	--	--	--	--	PREDICTED: glomulin-like [Apis dorsata]
c104928.graph_c0	2.38552e-37	-6.41818	down	--	Molecular Function: catalytic activity (GO:0003824);; Biological Process: metabolic process (GO:0008152);;	K00665|6.15687e-55|nvi:100122083|fatty acid synthase-like; K00665 fatty acid synthase, animal type [EC:2.3.1.85] (A)	--	PREDICTED: fatty acid synthase-like [Nasonia vitripennis]
c104904.graph_c0	4.97144e-17	-7.5743	down	--	--	--	--	--
c104899.graph_c0	1.26405e-05	5.73828	up	Cytoskeleton	Molecular Function: GTPase activity (GO:0003924);; Molecular Function: structural constituent of cytoskeleton (GO:0005200);; Molecular Function: GTP binding (GO:0005525);; Cellular Component: cytoplasm (GO:0005737);; Cellular Component: microtubule (GO:0005874);; Biological Process: GTP catabolic process (GO:0006184);; Biological Process: microtubule-based process (GO:0007017);; Biological Proces…	--	Tubulin beta-1 chain OS=Glossina morsitans morsitans (Savannah tsetse fly) PE=2 SV=1	PREDICTED: tubulin beta chain-like [Nasonia vitripennis]
c104883.graph_c0	2.10022e-07	-3.01422	down	--	--	--	--	putative salivary secreted peptide [Triatoma infestans]
c104857.graph_c0	0.00336293	-1.6633	down	--	--	K06678|0|nvi:100116245|condensin complex subunit 3; K06678 condensin complex subunit 3 (A)	--	PREDICTED: condensin complex subunit 3 isoform X1 [Nasonia vitripennis]
c104847.graph_c0	1.24434e-20	-5.7283	down	--	--	K18728|1.79822e-74|nvi:100679086|mediator of RNA polymerase II transcription subunit 12-like; K18728 eukaryotic translation initiation factor 4E transporter (A)	--	PREDICTED: mediator of RNA polymerase II transcription subunit 12-like isoform X5 [Nasonia vitripennis]
c104832.graph_c0	1.98548e-05	-8.02454	down	--	--	--	--	endonuclease-like venom protein precursor [Nasonia vitripennis]
c104799.graph_c1	4.62207e-49	-8.94862	down	General function prediction only	--	--	Alpha-latroinsectotoxin-Lt1a (Precursor; Fragment) OS=Latrodectus tredecimguttatus (Mediterranean black widow spider) PE=1 SV=1	ankyrin repeat protein [Trichomonas vaginalis G3]
c104799.graph_c0	2.43422e-17	-9.22067	down	--	--	--	--	--
c104798.graph_c3	2.70017e-06	-6.44742	down	--	--	--	--	--
c104798.graph_c1	2.64789e-10	-8.07116	down	--	Molecular Function: transcription regulatory region sequence-specific DNA binding (GO:0000976);; Molecular Function: sequence-specific DNA binding transcription factor activity (GO:0003700);; Cellular Component: nucleus (GO:0005634);; Biological Process: regulation of transcription, DNA-templated (GO:0006355);; Biological Process: multicellular organismal development (GO:0007275);;	K09311|6.67169e-78|nvi:100110062|Ftz; fushi-tarazu-like; K09311 Antp family, other (A)	Homeotic protein antennapedia GN=Antp OS=Drosophila melanogaster (Fruit fly) PE=1 SV=1	PREDICTED: homeobox protein Hox-D4 [Nasonia vitripennis]
c104798.graph_c0	1.22855e-11	Inf	down	--	--	--	--	--
c104785.graph_c1	2.46405e-07	-2.3782	down	Posttranslational modification, protein turnover, chaperones	Molecular Function: ubiquitin thiolesterase activity (GO:0004221);; Biological Process: ubiquitin-dependent protein catabolic process (GO:0006511);; Molecular Function: cysteine-type peptidase activity (GO:0008234);;	K11840|0|nvi:100120864|probable ubiquitin carboxyl-terminal hydrolase FAF-X; K11840 ubiquitin carboxyl-terminal hydrolase 9/24 [EC:3.4.19.12] (A)	Probable ubiquitin carboxyl-terminal hydrolase FAF GN=faf OS=Drosophila melanogaster (Fruit fly) PE=1 SV=2	PREDICTED: probable ubiquitin carboxyl-terminal hydrolase FAF-X isoform X1 [Nasonia vitripennis]
c104772.graph_c0	0.00363476	-1.8564	down	--	--	--	--	PREDICTED: transmembrane 7 superfamily member 3-like [Nasonia vitripennis]
c104758.graph_c0	0.000620585	-2.46147	down	--	Molecular Function: peptidase activity (GO:0008233);;	--	Putative serine protease K12H4.7 (Precursor) GN=K12H4.7 OS=Caenorhabditis elegans PE=3 SV=2	PREDICTED: putative serine protease K12H4.7-like [Bombus impatiens]
c104745.graph_c0	0.00178756	-1.98062	down	Amino acid transport and metabolism	--	--	Glucose dehydrogenase [FAD, quinone] short protein (Precursor) GN=Gld OS=Drosophila melanogaster (Fruit fly) PE=3 SV=3	PREDICTED: glucose dehydrogenase [FAD, quinone]-like [Nasonia vitripennis]
c104742.graph_c1	0.00952341	1.72403	up	--	--	--	--	--
c104741.graph_c0	0.00430091	-1.66044	down	--	--	--	Heterochromatin protein 1 GN=Su(var)205 OS=Drosophila melanogaster (Fruit fly) PE=1 SV=2	PREDICTED: mucin-22 isoform X1 [Nasonia vitripennis]
c104729.graph_c0	0.00492096	-2.71769	down	--	--	--	Protein jim lovell GN=lov OS=Drosophila melanogaster (Fruit fly) PE=2 SV=2	PREDICTED: LOW QUALITY PROTEIN: protein jim lovell [Nasonia vitripennis]
c104722.graph_c0	2.67624e-46	-7.45272	down	--	--	K02602|0|nvi:100119484|cytoplasmic polyadenylation element-binding protein 1; K02602 cytoplasmic polyadenylation element-binding protein (A)	Cytoplasmic polyadenylation element-binding protein 3 GN=cpb-3 OS=Caenorhabditis briggsae PE=2 SV=1	PREDICTED: cytoplasmic polyadenylation element-binding protein 1 isoform X1 [Nasonia vitripennis]
c104701.graph_c0	3.60426e-26	-4.96081	down	Inorganic ion transport and metabolism	Molecular Function: oxidoreductase activity (GO:0016491);;	--	Senecionine N-oxygenase (Precursor) GN=sno1 OS=Tyria jacobaeae (Cinnabar moth) PE=1 SV=1	PREDICTED: flavin-containing monooxygenase FMO GS-OX-like 2 [Nasonia vitripennis]
c104687.graph_c0	6.60678e-05	4.44566	up	--	Molecular Function: polyamine oxidase activity (GO:0046592);; Biological Process: oxidation-reduction process (GO:0055114);;	--	Protein anon-37Cs GN=anon-37Cs OS=Drosophila lebanonensis (Fruit fly) PE=3 SV=1	PREDICTED: peroxisomal N(1)-acetyl-spermine/spermidine oxidase [Nasonia vitripennis]
c104664.graph_c1	0.000153866	-2.57671	down	--	Molecular Function: nucleic acid binding (GO:0003676);; Molecular Function: ATP binding (GO:0005524);; Molecular Function: ATP-dependent helicase activity (GO:0008026);;	K12823|0|nvi:100121811|DEAD-box ATP-dependent RNA helicase 20-like; K12823 ATP-dependent RNA helicase DDX5/DBP2 [EC:3.6.4.13] (A)	ATP-dependent RNA helicase p62 GN=Rm62 OS=Drosophila melanogaster (Fruit fly) PE=1 SV=3	PREDICTED: DEAD-box ATP-dependent RNA helicase 20-like isoform X1 [Nasonia vitripennis]
c104628.graph_c2	0.00762464	-2.72842	down	--	--	--	--	--
c104628.graph_c1	3.26224e-12	-4.81106	down	--	Molecular Function: nucleotide binding (GO:0000166);; Cellular Component: microtubule cytoskeleton (GO:0015630);; Cellular Component: protein complex (GO:0043234);; Cellular Component: cytoskeletal part (GO:0044430);; Biological Process: single-organism cellular process (GO:0044763);;	K10395|0|nvi:100122878|kinesin-4B; kinesin 4B; K10395 kinesin family member 4/21/27 (A)	Osmotic avoidance abnormal protein 3 GN=osm-3 OS=Caenorhabditis elegans PE=2 SV=4	PREDICTED: chromosome-associated kinesin KIF4A [Nasonia vitripennis]
c104628.graph_c0	7.62299e-08	-5.96592	down	Cytoskeleton	Molecular Function: microtubule motor activity (GO:0003777);; Molecular Function: ATP binding (GO:0005524);; Cellular Component: chromosome (GO:0005694);; Cellular Component: kinesin complex (GO:0005871);; Cellular Component: microtubule (GO:0005874);; Biological Process: microtubule-based movement (GO:0007018);; Molecular Function: microtubule binding (GO:0008017);; Cellular Component: integral …	K10395|8.98056e-104|nvi:100122878|kinesin-4B; kinesin 4B; K10395 kinesin family member 4/21/27 (A)	Kinesin-related protein 8 GN=kif8 OS=Dictyostelium discoideum (Slime mold) PE=2 SV=1	PREDICTED: chromosome-associated kinesin KIF4A [Nasonia vitripennis]
c104627.graph_c0	0.00183149	-1.73797	down	--	--	--	--	PREDICTED: uncharacterized threonine-rich GPI-anchored glycoprotein PJ4664.02-like [Nasonia vitripennis]
c104623.graph_c0	0.000259361	1.94048	up	--	--	--	--	--
c104622.graph_c0	1.07258e-15	-9.04023	down	--	--	--	--	PREDICTED: uncharacterized protein LOC100680141 isoform X1 [Nasonia vitripennis]
c104606.graph_c0	0.000623211	-1.76443	down	--	Molecular Function: GTP binding (GO:0005525);; Cellular Component: intracellular (GO:0005622);; Biological Process: small GTPase mediated signal transduction (GO:0007264);;	--	Rho GTPase-activating protein 190 GN=RhoGAPp190 OS=Drosophila melanogaster (Fruit fly) PE=1 SV=2	PREDICTED: rho GTPase-activating protein 190 isoform X3 [Nasonia vitripennis]
c104573.graph_c0	5.98722e-05	-2.55336	down	Posttranslational modification, protein turnover, chaperones	--	--	Neprilysin-11 GN=nep-11 OS=Caenorhabditis elegans PE=1 SV=2	PREDICTED: endothelin-converting enzyme 1-like, partial [Nasonia vitripennis]
c104572.graph_c0	0.000403461	1.67042	up	Nucleotide transport and metabolism	Molecular Function: ATP binding (GO:0005524);; Biological Process: nucleobase-containing compound metabolic process (GO:0006139);; Biological Process: phosphorylation (GO:0016310);; Molecular Function: nucleobase-containing compound kinase activity (GO:0019205);;	K00939|3.90356e-109|nvi:100116983|adenylate kinase isoenzyme 1; K00939 adenylate kinase [EC:2.7.4.3] (A)	Adenylate kinase isoenzyme 1 {ECO:0000255|HAMAP-Rule:MF_03171} GN=F38B2.4 OS=Caenorhabditis elegans PE=2 SV=1	PREDICTED: adenylate kinase isoenzyme 1 [Nasonia vitripennis]
c104557.graph_c0	1.44297e-39	-7.05502	down	--	--	--	--	PREDICTED: uncharacterized protein LOC103578886 [Microplitis demolitor]
c104541.graph_c0	3.35984e-06	-2.28694	down	--	--	--	--	PREDICTED: putative leucine-rich repeat-containing protein DDB_G0290503 [Nasonia vitripennis]
c104539.graph_c0	0.00497205	-1.31651	down	Secondary metabolites biosynthesis, transport and catabolism	Biological Process: metabolic process (GO:0008152);; Molecular Function: hydrolase activity (GO:0016787);;	--	Fumarylacetoacetate hydrolase domain-containing protein 2 homolog GN=fahd2 OS=Dictyostelium discoideum (Slime mold) PE=3 SV=1	PREDICTED: fumarylacetoacetate hydrolase domain-containing protein 2A [Nasonia vitripennis]
c104537.graph_c0	0.00372582	-1.37396	down	--	--	--	Transferrin (Precursor) OS=Blaberus discoidalis (Tropical cockroach) PE=1 SV=1	PREDICTED: transferrin-like [Nasonia vitripennis]
c104535.graph_c0	5.25436e-07	-5.03669	down	Replication, recombination and repair	--	--	--	PREDICTED: speckle targeted PIP5K1A-regulated poly(A) polymerase-like isoform X2 [Nasonia vitripennis]
c104532.graph_c0	1.10715e-17	-5.94428	down	--	Molecular Function: translation initiation factor activity (GO:0003743);; Molecular Function: ATP binding (GO:0005524);; Cellular Component: transcription factor TFIIF complex (GO:0005674);; Biological Process: transcription initiation from RNA polymerase II promoter (GO:0006367);; Biological Process: translational initiation (GO:0006413);; Molecular Function: ATP-dependent helicase activity (GO:…	K03139|2.13346e-22|nvi:100119177|general transcription factor IIF subunit 2; K03139 transcription initiation factor TFIIF subunit beta [EC:3.6.4.12] (A)	General transcription factor IIF subunit 2 GN=TfIIFbeta OS=Drosophila melanogaster (Fruit fly) PE=2 SV=2	PREDICTED: general transcription factor IIF subunit 2 [Microplitis demolitor]
c104525.graph_c0	6.04431e-10	-6.1946	down	--	Molecular Function: oxidoreductase activity (GO:0016491);;	--	Phenoloxidase 3 (Precursor) GN=PPO3 OS=Drosophila melanogaster (Fruit fly) PE=1 SV=1	diphenol oxidase 3 [Nasonia vitripennis]
c104517.graph_c0	0.000571642	-3.88522	down	--	--	--	--	PREDICTED: flightin isoform X1 [Nasonia vitripennis]
c104512.graph_c4	0.00240011	1.62213	up	--	--	--	--	--
c104512.graph_c3	5.27446e-18	-7.82104	down	--	--	--	--	--
c104512.graph_c1	0.000246682	1.97406	up	--	--	--	--	--
c104498.graph_c0	0.00699588	-1.38069	down	--	--	--	--	PREDICTED: uncharacterized protein LOC100119416 [Nasonia vitripennis]
c104497.graph_c1	1.08288e-08	-2.69187	down	--	Molecular Function: nucleic acid binding (GO:0003676);; Molecular Function: ATP binding (GO:0005524);; Molecular Function: ATP-dependent helicase activity (GO:0008026);;	K12614|0|nvi:100119050|putative ATP-dependent RNA helicase me31b; K12614 ATP-dependent RNA helicase DDX6/DHH1 [EC:3.6.4.13] (A)	Putative ATP-dependent RNA helicase me31b GN=me31B OS=Drosophila melanogaster (Fruit fly) PE=1 SV=3	PREDICTED: putative ATP-dependent RNA helicase me31b [Nasonia vitripennis]
c104497.graph_c0	0.00768019	-2.33029	down	--	Molecular Function: nucleic acid binding (GO:0003676);; Molecular Function: ATP binding (GO:0005524);; Molecular Function: ATP-dependent helicase activity (GO:0008026);;	K12614|0|nvi:100119050|putative ATP-dependent RNA helicase me31b; K12614 ATP-dependent RNA helicase DDX6/DHH1 [EC:3.6.4.13] (A)	Putative ATP-dependent RNA helicase me31b GN=me31B OS=Drosophila melanogaster (Fruit fly) PE=1 SV=3	PREDICTED: putative ATP-dependent RNA helicase me31b [Nasonia vitripennis]
c104485.graph_c0	0.00998864	-1.83403	down	--	--	K11268|0|nvi:100118469|N-acetyltransferase ESCO2-like; K11268 N-acetyltransferase [EC:2.3.1.-] (A)	N-acetyltransferase eco GN=eco OS=Drosophila melanogaster (Fruit fly) PE=1 SV=1	PREDICTED: N-acetyltransferase ESCO2-like [Nasonia vitripennis]
c104476.graph_c0	0.000260273	-3.77273	down	--	--	--	--	PREDICTED: uncharacterized protein LOC100120886 [Nasonia vitripennis]
c104473.graph_c0	1.64262e-08	-7.50046	down	--	--	--	Protein glass GN=gl OS=Drosophila virilis (Fruit fly) PE=3 SV=1	PREDICTED: zinc finger protein 90 homolog [Nasonia vitripennis]
c104467.graph_c0	1.91944e-22	-5.69456	down	--	--	K18411|7.83497e-112|nvi:100123079|uncharacterized LOC100123079; K18411 protein maelstrom (A)	Protein maelstrom homolog GN=mael OS=Culex quinquefasciatus (Southern house mosquito) PE=3 SV=1	PREDICTED: uncharacterized protein LOC100123079 [Nasonia vitripennis]
c104464.graph_c0	0.000184177	-4.03196	down	--	--	--	--	hypothetical protein EAG_10155 [Camponotus floridanus]
c104463.graph_c0	0.000153567	-2.06471	down	--	--	K02156|0|nvi:100119876|protein argonaute-3; K02156 aubergine (A)	Protein argonaute-3 {ECO:0000312|EMBL:EAA45981.3} GN=AGO3 OS=Drosophila melanogaster (Fruit fly) PE=1 SV=3	PREDICTED: protein argonaute-3 [Nasonia vitripennis]
c104448.graph_c2	0.00388655	1.39251	up	--	--	--	--	--
c104442.graph_c0	0.000344369	-1.63283	down	--	--	--	Blastoderm-specific protein 25D GN=Bsg25D OS=Drosophila melanogaster (Fruit fly) PE=1 SV=2	PREDICTED: blastoderm-specific protein 25D-like [Nasonia vitripennis]
c104440.graph_c0	7.66642e-14	-7.11367	down	--	Molecular Function: catalytic activity (GO:0003824);; Biological Process: metabolic process (GO:0008152);;	K00665|6.01869e-20|nvi:100122083|fatty acid synthase-like; K00665 fatty acid synthase, animal type [EC:2.3.1.85] (A)	--	PREDICTED: fatty acid synthase [Microplitis demolitor]
c104431.graph_c1	0.000128812	-1.77721	down	Carbohydrate transport and metabolism	Molecular Function: chitinase activity (GO:0004568);; Cellular Component: extracellular space (GO:0005615);; Biological Process: carbohydrate metabolic process (GO:0005975);; Biological Process: chitin catabolic process (GO:0006032);; Molecular Function: chitin binding (GO:0008061);;	K01183|0|nvi:100117528|Cht5; chitinase 5 (EC:3.2.1.14); K01183 chitinase [EC:3.2.1.14] (A)	Endochitinase (Precursor) OS=Manduca sexta (Tobacco hawkmoth) PE=2 SV=1	chitinase 5 precursor [Nasonia vitripennis]
c104412.graph_c0	2.13931e-06	-2.50341	down	--	--	--	--	PREDICTED: E3 ubiquitin-protein ligase RNF169-like isoform X1 [Nasonia vitripennis]
c104384.graph_c4	1.76704e-06	5.53982	up	--	--	--	--	--
c104381.graph_c1	0.000711985	-4.08332	down	--	--	--	--	--
c104380.graph_c0	0.00031723	1.67762	up	Posttranslational modification, protein turnover, chaperones	Molecular Function: serine-type endopeptidase activity (GO:0004252);; Biological Process: proteolysis (GO:0006508);;	K01360|0|ame:408835|amon, GB15843; amontillado; K01360 proprotein convertase subtilisin/kexin type 2 [EC:3.4.21.94] (A)	Furin-like protease 1, isoforms 1/1-X/2 (Precursor) GN=Fur1 OS=Drosophila melanogaster (Fruit fly) PE=2 SV=2	PREDICTED: neuroendocrine convertase 2 isoform 1 [Apis mellifera]
c104370.graph_c0	8.69896e-05	-1.81968	down	Replication, recombination and repair	Molecular Function: nucleotidyltransferase activity (GO:0016779);; Molecular Function: isomerase activity (GO:0016853);;	K03514|0|nvi:100121195|non-canonical poly(A) RNA polymerase PAPD5-like; K03514 non-canonical poly(A) RNA polymerase PAPD5/7 [EC:2.7.7.19] (A)	Poly(A) RNA polymerase gld-4 {ECO:0000303|PubMed:19339688} OS=Caenorhabditis elegans PE=1 SV=1	PREDICTED: PAP-associated domain-containing protein 5-like [Megachile rotundata]
c104369.graph_c0	0.00878078	-2.23894	down	--	Biological Process: cellular process (GO:0009987);; Molecular Function: carbohydrate binding (GO:0030246);;	--	Hemolymph lipopolysaccharide-binding protein (Precursor) OS=Periplaneta americana (American cockroach) PE=1 SV=1	PREDICTED: hemolymph lipopolysaccharide-binding protein-like [Nasonia vitripennis]
c104358.graph_c3	0.00286194	-1.39728	down	--	Cellular Component: proteinaceous extracellular matrix (GO:0005578);; Cellular Component: extracellular matrix part (GO:0044420);;	K06237|0|nvi:100119830|Cg25c; collagen type IV; K06237 collagen, type IV, alpha (A)	Collagen alpha-2(IV) chain (Precursor) OS=Ascaris suum (Pig roundworm) PE=2 SV=1	PREDICTED: LOW QUALITY PROTEIN: collagen alpha-1(IV) chain [Nasonia vitripennis]
c104325.graph_c0	1.00958e-09	-7.16725	down	--	--	--	--	--
c104321.graph_c1	0.00250426	1.43751	up	General function prediction only	Molecular Function: osmosensor activity (GO:0005034);; Molecular Function: neurotransmitter:sodium symporter activity (GO:0005328);; Biological Process: neurotransmitter transport (GO:0006836);; Molecular Function: photoreceptor activity (GO:0009881);; Cellular Component: integral component of membrane (GO:0016021);; Biological Process: transmission of nerve impulse (GO:0019226);; Biological Proc…	K05039|0|nvi:100115303|sodium- and chloride-dependent GABA transporter ine; K05039 solute carrier family 6 (neurotransmitter transporter, GABA) member 6/8/11/12/13 (A)	Sodium- and chloride-dependent GABA transporter ine OS=Drosophila melanogaster (Fruit fly) PE=1 SV=1	PREDICTED: sodium- and chloride-dependent GABA transporter ine isoform X1 [Nasonia vitripennis]
c104315.graph_c0	1.74531e-05	-2.91886	down	--	--	--	--	PREDICTED: uncharacterized protein LOC100117895 isoform X2 [Nasonia vitripennis]
c104314.graph_c3	0.00118343	-1.57946	down	--	Molecular Function: aspartate carbamoyltransferase activity (GO:0004070);; Molecular Function: ATP binding (GO:0005524);; Biological Process: 'de novo' pyrimidine nucleobase biosynthetic process (GO:0006207);; Biological Process: glutamine catabolic process (GO:0006543);; Molecular Function: amino acid binding (GO:0016597);; Molecular Function: hydrolase activity, acting on carbon-nitrogen (but n…	K11540|0|nvi:100123107|CAD protein; K11540 carbamoyl-phosphate synthase / aspartate carbamoyltransferase / dihydroorotase [EC:6.3.5.5 2.1.3.2 3.5.2.3] (A)	Dihydroorotase GN=r OS=Drosophila melanogaster (Fruit fly) PE=1 SV=3	PREDICTED: CAD protein isoform X1 [Nasonia vitripennis]
c104309.graph_c0	0.00290752	-1.43217	down	--	--	K12172|0|nvi:100120774|ranBP2-like and GRIP domain-containing protein 3; K12172 E3 SUMO-protein ligase RanBP2 (A)	Ran-specific GTPase-activating protein homolog GN=ranbp1 OS=Dictyostelium discoideum (Slime mold) PE=1 SV=1	PREDICTED: ranBP2-like and GRIP domain-containing protein 3 [Nasonia vitripennis]
c104308.graph_c0	0.00502515	-1.38244	down	--	Molecular Function: glycine N-methyltransferase activity (GO:0017174);; Biological Process: methylation (GO:0032259);;	--	Protein roadkill GN=rdx OS=Drosophila melanogaster (Fruit fly) PE=1 SV=2	PREDICTED: glycine N-methyltransferase-like isoform X2 [Nasonia vitripennis]
c104293.graph_c1	0.00618386	1.68101	up	--	--	--	--	--
c104291.graph_c0	0.000906364	Inf	up	--	--	--	--	PREDICTED: stress response protein NST1-like [Nasonia vitripennis]
c104268.graph_c0	0.00283178	-1.43608	down	General function prediction only	Molecular Function: ATP binding (GO:0005524);; Molecular Function: nucleoside-triphosphatase activity (GO:0017111);;	K17681|0|nvi:100121271|ATPase family AAA domain-containing protein 3; K17681 ATPase family AAA domain-containing protein 3A/B (A)	ATPase family AAA domain-containing protein 3 GN=atad-3 OS=Caenorhabditis elegans PE=3 SV=2	PREDICTED: ATPase family AAA domain-containing protein 3 [Nasonia vitripennis]
c104263.graph_c0	1.02477e-06	-2.9644	down	--	--	--	--	PREDICTED: uncharacterized protein LOC100115799 [Nasonia vitripennis]
c104257.graph_c0	0.00577294	-1.59477	down	--	--	K09041|6.38028e-112|nvi:100120332|segmentation protein cap'n'collar-like; K09041 nuclear factor erythroid 2, invertebrate (A)	Segmentation protein cap&apos;n&apos;collar GN=cnc OS=Drosophila melanogaster (Fruit fly) PE=2 SV=3	PREDICTED: segmentation protein cap&apos;n&apos;collar-like, partial [Nasonia vitripennis]
c104247.graph_c0	0.00270428	-5.69607	down	--	--	--	--	PREDICTED: uncharacterized protein LOC105198616 [Solenopsis invicta]
c104232.graph_c0	0.00037005	-2.91753	down	Signal transduction mechanisms	Molecular Function: guanylate cyclase activity (GO:0004383);; Molecular Function: protein kinase activity (GO:0004672);; Molecular Function: ATP binding (GO:0005524);; Biological Process: cGMP biosynthetic process (GO:0006182);; Biological Process: protein phosphorylation (GO:0006468);; Biological Process: intracellular signal transduction (GO:0035556);;	--	Guanylate cyclase 32E (Precursor) GN=Gyc32E OS=Drosophila melanogaster (Fruit fly) PE=1 SV=4	PREDICTED: guanylate cyclase 32E-like [Nasonia vitripennis]
c104231.graph_c0	1.90063e-05	-4.82591	down	--	--	--	--	--
c104225.graph_c0	0.00250426	-1.57791	down	Translation, ribosomal structure and biogenesis	--	K14565|0|nvi:100117102|nucleolar protein 58; K14565 nucleolar protein 58 (A)	Nucleolar protein 58 GN=nop58 OS=Dictyostelium discoideum (Slime mold) PE=3 SV=1	PREDICTED: nucleolar protein 58 [Nasonia vitripennis]
c104220.graph_c1	0.00237825	-2.28944	down	Cytoskeleton	Molecular Function: nucleotide binding (GO:0000166);; Cellular Component: microtubule cytoskeleton (GO:0015630);; Cellular Component: protein complex (GO:0043234);; Cellular Component: cytoskeletal part (GO:0044430);;	K11498|0|nvi:100121143|kinesin-7; kinesin 7; K11498 centromeric protein E (A)	Kinesin-related protein 4 GN=kif4 OS=Dictyostelium discoideum (Slime mold) PE=2 SV=1	PREDICTED: centromere-associated protein E [Nasonia vitripennis]
c104212.graph_c0	0.00031437	-1.93492	down	--	--	--	Four-domain proteases inhibitor OS=Melithaea caledonica PE=1 SV=1	PREDICTED: serine protease inhibitor dipetalogastin-like [Nasonia vitripennis]
c104204.graph_c1	0.00263414	1.50423	up	--	--	--	--	--
c104195.graph_c0	0.00340063	2.12523	up	--	--	--	--	PREDICTED: lisH domain-containing protein C1711.05-like isoform X2 [Nasonia vitripennis]
c104185.graph_c0	0.00823581	-2.98607	down	General function prediction only	Molecular Function: oxidoreductase activity (GO:0016491);; Biological Process: oxidation-reduction process (GO:0055114);;	K00010|0|nvi:100120331|uncharacterized oxidoreductase C115.03-like; K00010 myo-inositol 2-dehydrogenase / D-chiro-inositol 1-dehydrogenase [EC:1.1.1.18 1.1.1.369] (A)	Nuclear distribution protein nudE homolog GN=nudE OS=Drosophila melanogaster (Fruit fly) PE=2 SV=2	PREDICTED: uncharacterized oxidoreductase C115.03-like [Nasonia vitripennis]
c104183.graph_c0	0.00621561	-2.4117	down	--	--	--	Teneurin-a GN=Ten-a OS=Drosophila melanogaster (Fruit fly) PE=1 SV=2	PREDICTED: uncharacterized protein LOC100123534 [Nasonia vitripennis]
c104179.graph_c1	0.0090531	-2.21679	down	--	Biological Process: signal transduction (GO:0007165);;	K16449|1.14442e-117|nvi:100117712|regulator of G-protein signaling loco; K16449 regulator of G-protein signaling (A)	Regulator of G-protein signaling loco GN=loco OS=Drosophila melanogaster (Fruit fly) PE=1 SV=2	PREDICTED: regulator of G-protein signaling loco isoform X2 [Nasonia vitripennis]
c104178.graph_c0	0.00944542	-2.70788	down	Replication, recombination and repair	Molecular Function: nucleotide binding (GO:0000166);;	K10737|0|nvi:100123728|DNA helicase MCM8; K10737 DNA helicase MCM8 [EC:3.6.4.12] (A)	DNA replication licensing factor Mcm2 GN=Mcm2 OS=Drosophila melanogaster (Fruit fly) PE=1 SV=1	PREDICTED: DNA helicase MCM8 [Nasonia vitripennis]
c104167.graph_c0	0.00848074	-1.27426	down	--	--	K18405|0|nvi:100121226|tudor domain-containing protein 7A-like; K18405 tudor domain-containing protein 1/4/6/7 (A)	--	PREDICTED: tudor domain-containing protein 7A-like [Nasonia vitripennis]
c104145.graph_c0	0.00664875	2.91597	up	--	--	--	--	--
c104127.graph_c1	1.85057e-05	-2.06377	down	--	--	--	--	PREDICTED: cell wall protein AWA1-like isoform X1 [Nasonia vitripennis]
c104123.graph_c0	2.67e-45	11.1042	up	--	--	--	--	--
c104113.graph_c0	8.20275e-12	-3.62465	down	Cytoskeleton	Molecular Function: microtubule motor activity (GO:0003777);; Molecular Function: ATP binding (GO:0005524);; Cellular Component: kinesin complex (GO:0005871);; Cellular Component: microtubule (GO:0005874);; Biological Process: microtubule-based movement (GO:0007018);; Molecular Function: microtubule binding (GO:0008017);;	K10398|0|nvi:100116207|kinesin-5; kinesin 5; K10398 kinesin family member 11 (A)	Bipolar kinesin KRP-130 GN=Klp61F OS=Drosophila melanogaster (Fruit fly) PE=1 SV=2	PREDICTED: bipolar kinesin KRP-130 isoform X1 [Nasonia vitripennis]
c104110.graph_c1	0.00656707	-1.34266	down	--	Molecular Function: structural molecule activity (GO:0005198);; Cellular Component: nuclear inner membrane (GO:0005637);; Cellular Component: lamin filament (GO:0005638);;	K07611|0|nvi:100122279|lamin Dm0-like; K07611 lamin B (A)	Lamin-C GN=LamC OS=Drosophila melanogaster (Fruit fly) PE=1 SV=2	PREDICTED: lamin Dm0-like isoform X1 [Nasonia vitripennis]
c104107.graph_c0	0.00708252	2.2177	up	--	--	--	--	PREDICTED: LOW QUALITY PROTEIN: piggyBac transposable element-derived protein 3-like [Nasonia vitripennis]
c104100.graph_c0	1.01849e-05	-5.10899	down	Function unknown	--	--	--	PREDICTED: embryonic stem cell-specific 5-hydroxymethylcytosine-binding protein [Nasonia vitripennis]
c104077.graph_c0	2.64845e-05	-8.76928	down	General function prediction only	Biological Process: lipid metabolic process (GO:0006629);; Molecular Function: hydrolase activity (GO:0016787);;	--	Lipase 3 (Precursor) GN=Lip3 OS=Drosophila melanogaster (Fruit fly) PE=2 SV=1	PREDICTED: lipase 3-like [Nasonia vitripennis]
c104071.graph_c1	0.00385193	1.77599	up	--	--	--	Diuretic hormone class 2 (Precursor) GN=Dh31 OS=Drosophila melanogaster (Fruit fly) PE=3 SV=1	PREDICTED: diuretic hormone class 2 isoform X1 [Nasonia vitripennis]
c104071.graph_c0	0.000793016	1.61824	up	--	--	--	--	--
c104059.graph_c0	0.00101109	2.29663	up	--	Molecular Function: protein serine/threonine kinase activity (GO:0004674);; Molecular Function: ATP binding (GO:0005524);; Biological Process: protein phosphorylation (GO:0006468);;	K04345|0|nvi:100119822|protein kinase DC2; K04345 protein kinase A [EC:2.7.11.11] (A)	Protein kinase DC2 GN=Pka-C3 OS=Drosophila melanogaster (Fruit fly) PE=2 SV=2	PREDICTED: protein kinase DC2 [Nasonia vitripennis]
c104051.graph_c1	0.00197596	-1.69789	down	Posttranslational modification, protein turnover, chaperones	Molecular Function: ATP binding (GO:0005524);; Biological Process: protein folding (GO:0006457);; Biological Process: response to stress (GO:0006950);; Molecular Function: unfolded protein binding (GO:0051082);;	K09488|0|nvi:100115817|heat shock protein 75 kDa, mitochondrial; K09488 TNF receptor-associated protein 1 (A)	TNF receptor-associated protein 1 homolog, mitochondrial (Precursor) GN=trap1 OS=Dictyostelium discoideum (Slime mold) PE=2 SV=1	PREDICTED: heat shock protein 75 kDa, mitochondrial [Nasonia vitripennis]
c104036.graph_c0	1.00644e-10	Inf	down	--	--	--	Venom metalloproteinase 3 OS=Eulophus pennicornis (Parasitoid wasp) PE=2 SV=1	PREDICTED: uncharacterized protein LOC100123845 [Nasonia vitripennis]
c104033.graph_c0	1.09573e-05	-3.11047	down	Transcription	--	K11373|0|nvi:100122194|putative elongator complex protein 1; K11373 elongator complex protein 1 (A)	Putative elongator complex protein 1 GN=Elp1 OS=Drosophila melanogaster (Fruit fly) PE=1 SV=2	PREDICTED: putative elongator complex protein 1 [Nasonia vitripennis]
c103992.graph_c1	0.000276394	-2.47606	down	--	--	--	--	--
c103988.graph_c1	0.00147461	3.42714	up	--	--	--	--	--
c103973.graph_c1	6.8651e-05	-4.25888	down	--	--	--	--	PREDICTED: uncharacterized protein LOC105196836 [Solenopsis invicta]
c103948.graph_c0	1.70696e-13	-3.56755	down	General function prediction only	--	--	Alpha-latrocrustotoxin-Lt1a (Precursor; Fragment) OS=Latrodectus tredecimguttatus (Mediterranean black widow spider) PE=2 SV=2	PREDICTED: ankyrin-1-like [Nasonia vitripennis]
c103942.graph_c0	3.40102e-06	-2.2719	down	--	Molecular Function: ATP binding (GO:0005524);; Biological Process: protein phosphorylation (GO:0006468);; Molecular Function: RNA polymerase II carboxy-terminal domain kinase activity (GO:0008353);; Biological Process: cell division (GO:0051301);;	K02208|0|nvi:100114430|cyclin-dependent kinase 8; K02208 cyclin-dependent kinase 8/11 [EC:2.7.11.22 2.7.11.23] (A)	Cyclin-dependent kinase 8 GN=Cdk8 OS=Aedes aegypti (Yellowfever mosquito) PE=3 SV=2	PREDICTED: cyclin-dependent kinase 8 [Harpegnathos saltator]
c103937.graph_c0	0.000104778	-3.21163	down	--	Molecular Function: transferase activity (GO:0016740);;	--	--	PREDICTED: uncharacterized protein DDB_G0287625-like [Nasonia vitripennis]
c103934.graph_c0	0.0026738	3.35768	up	--	--	--	--	PREDICTED: uncharacterized protein LOC103317534 [Nasonia vitripennis]
c103927.graph_c0	2.87765e-07	-6.94138	down	--	--	--	--	--
c103924.graph_c0	0.00257596	1.43808	up	--	Molecular Function: microtubule motor activity (GO:0003777);; Molecular Function: ATP binding (GO:0005524);; Molecular Function: phospholipid binding (GO:0005543);; Cellular Component: kinesin complex (GO:0005871);; Cellular Component: microtubule (GO:0005874);; Biological Process: microtubule-based movement (GO:0007018);; Molecular Function: microtubule binding (GO:0008017);;	K10392|5.33097e-136|nvi:100121724|kinesin-3B; kinesin 3B; K10392 kinesin family member 1 (A)	Kinesin-like protein unc-104 OS=Aedes aegypti (Yellowfever mosquito) PE=3 SV=1	PREDICTED: kinesin-like protein unc-104 isoform X3 [Nasonia vitripennis]
c103923.graph_c0	5.39083e-26	-9.9909	down	--	--	--	--	PREDICTED: uncharacterized protein LOC100119851 [Nasonia vitripennis]
c103916.graph_c1	0.00878078	2.7163	up	--	--	--	--	PREDICTED: uncharacterized protein LOC103315718 [Nasonia vitripennis]
c103913.graph_c0	1.01849e-05	-2.59053	down	--	--	--	--	--
c103910.graph_c0	0.00296646	1.53664	up	--	--	--	--	--
c103907.graph_c1	9.81921e-10	-3.24194	down	--	--	--	Apolipophorin-1 (Precursor) OS=Locusta migratoria (Migratory locust) PE=1 SV=2	PREDICTED: apolipophorins [Nasonia vitripennis]
c103894.graph_c0	0.00423716	-2.08909	down	--	--	--	--	--
c103882.graph_c0	1.74568e-14	-3.95281	down	--	--	K02156|0|nvi:100118414|protein aubergine-like; K02156 aubergine (A)	Protein aubergine {ECO:0000312|EMBL:AGA18944.1} GN=aub OS=Drosophila melanogaster (Fruit fly) PE=1 SV=1	PREDICTED: protein aubergine-like isoform X1 [Nasonia vitripennis]
c103879.graph_c0	0.00286624	-2.85781	down	--	--	K05637|0|nvi:100118105|laminin subunit alpha-2; K05637 laminin, alpha 1/2 (A)	Laminin subunit gamma-1 (Precursor) GN=LanB2 OS=Drosophila melanogaster (Fruit fly) PE=2 SV=2	PREDICTED: laminin subunit alpha-2 isoform X1 [Nasonia vitripennis]
c103853.graph_c0	0.00294957	-1.46173	down	--	Molecular Function: protein disulfide isomerase activity (GO:0003756);; Cellular Component: endoplasmic reticulum (GO:0005783);; Cellular Component: lipid particle (GO:0005811);; Cellular Component: microtubule associated complex (GO:0005875);; Biological Process: protein folding (GO:0006457);; Biological Process: glycerol ether metabolic process (GO:0006662);; Molecular Function: electron carrie…	K08056|0|nvi:100115387|protein disulfide-isomerase A3; K08056 protein disulfide isomerase family A, member 3 [EC:5.3.4.1] (A)	Probable protein disulfide-isomerase ER-60 (Precursor) OS=Schistosoma mansoni (Blood fluke) PE=3 SV=1	PREDICTED: protein disulfide-isomerase A3 [Nasonia vitripennis]
c103829.graph_c0	1.11063e-14	-3.37221	down	--	Molecular Function: neuropeptide hormone activity (GO:0005184);; Cellular Component: extracellular region (GO:0005576);;	--	Ion transport peptide-like (Precursor) OS=Schistocerca gregaria (Desert locust) PE=2 SV=1	PREDICTED: ion transport peptide-like isoform X1 [Nasonia vitripennis]
c103828.graph_c0	3.69725e-11	-5.62884	down	--	--	--	--	--
c103821.graph_c0	5.86889e-05	-2.80618	down	--	--	--	--	--
c103810.graph_c0	1.10442e-14	-7.24428	down	--	Molecular Function: zinc ion binding (GO:0008270);;	--	Protein pygopus GN=pygo OS=Drosophila melanogaster (Fruit fly) PE=1 SV=1	PREDICTED: protein pygopus-like [Nasonia vitripennis]
c103807.graph_c0	0.00137888	-5.35921	down	--	--	--	Proclotting enzyme heavy chain (Precursor) OS=Tachypleus tridentatus (Japanese horseshoe crab) PE=1 SV=1	serine protease homolog 21 precursor [Nasonia vitripennis]
c103798.graph_c0	2.4758e-07	-2.3305	down	--	Molecular Function: electron carrier activity (GO:0009055);; Molecular Function: protein disulfide oxidoreductase activity (GO:0015035);; Biological Process: cell redox homeostasis (GO:0045454);;	K17479|1.40164e-180|nvi:100118696|glutaredoxin domain-containing cysteine-rich protein CG12206-like; K17479 glutaredoxin domain-containing cysteine-rich protein 1 (A)	Glutaredoxin domain-containing cysteine-rich protein CG31559 GN=CG31559 OS=Drosophila melanogaster (Fruit fly) PE=1 SV=2	PREDICTED: glutaredoxin domain-containing cysteine-rich protein CG12206-like [Nasonia vitripennis]
c103790.graph_c1	0.00704266	1.53239	up	--	--	--	--	--
c103790.graph_c0	0.000759577	1.83763	up	--	--	--	--	--
c103785.graph_c1	0.00558726	1.38051	up	--	--	--	--	--
c103783.graph_c0	0.00870497	-2.3569	down	Nucleotide transport and metabolism	Biological Process: metabolic process (GO:0008152);; Molecular Function: zinc ion binding (GO:0008270);; Molecular Function: hydrolase activity, acting on carbon-nitrogen (but not peptide) bonds (GO:0016810);;	K01493|4.2782e-77|nvi:100118441|deoxycytidylate deaminase-like; K01493 dCMP deaminase [EC:3.5.4.12] (A)	Probable deoxycytidylate deaminase GN=CG6951 OS=Drosophila melanogaster (Fruit fly) PE=2 SV=1	PREDICTED: deoxycytidylate deaminase-like [Nasonia vitripennis]
c103772.graph_c0	3.55025e-06	-4.33565	down	--	--	--	--	--
c103765.graph_c0	4.39835e-05	6.83891	up	--	--	--	--	PREDICTED: uncharacterized protein LOC103316663 isoform X2 [Nasonia vitripennis]
c103738.graph_c0	0.00333604	-1.73949	down	--	--	--	--	PREDICTED: mucin-4-like isoform X2 [Nasonia vitripennis]
c103734.graph_c0	1.40858e-11	-2.95715	down	Carbohydrate transport and metabolism	Molecular Function: alpha-1,4-glucosidase activity (GO:0004558);; Biological Process: metabolic process (GO:0008152);;	K01187|0|nvi:100121079|alpha-glucosidase-like; K01187 alpha-glucosidase [EC:3.2.1.20] (A)	Alpha-glucosidase (Precursor) OS=Apis mellifera (Honeybee) PE=1 SV=1	PREDICTED: alpha-glucosidase-like [Nasonia vitripennis]
c103728.graph_c2	9.0504e-25	-5.18433	down	Cell cycle control, cell division, chromosome partitioning	Molecular Function: protein tyrosine phosphatase activity (GO:0004725);; Cellular Component: intracellular (GO:0005622);; Biological Process: peptidyl-tyrosine dephosphorylation (GO:0035335);;	K16723|2.80575e-133|nvi:100117630|Cdc25, str; M-phase inducer phosphatase; K16723 M-phase inducer phosphatase [EC:3.1.3.48] (A)	M-phase inducer phosphatase GN=stg OS=Drosophila melanogaster (Fruit fly) PE=1 SV=2	PREDICTED: M-phase inducer phosphatase isoform X1 [Nasonia vitripennis]
c103728.graph_c1	1.11517e-26	-5.7811	down	--	--	K16723|9.6921e-113|nvi:100117630|Cdc25, str; M-phase inducer phosphatase; K16723 M-phase inducer phosphatase [EC:3.1.3.48] (A)	--	PREDICTED: M-phase inducer phosphatase isoform X3 [Nasonia vitripennis]
c103728.graph_c0	7.13941e-19	-9.21921	down	--	--	--	--	--
c103726.graph_c0	0.000885806	1.60184	up	Inorganic ion transport and metabolism	Molecular Function: potassium channel activity (GO:0005267);; Cellular Component: integral component of membrane (GO:0016021);; Biological Process: potassium ion transmembrane transport (GO:0071805);;	--	TWiK family of potassium channels protein 18 GN=twk-18 OS=Caenorhabditis elegans PE=1 SV=2	PREDICTED: uncharacterized protein LOC100123552 isoform X2 [Nasonia vitripennis]
c103698.graph_c0	0.00118917	-1.937	down	--	--	--	Putative vitellogenin receptor (Precursor) GN=yl OS=Drosophila melanogaster (Fruit fly) PE=1 SV=2	PREDICTED: low-density lipoprotein receptor-related protein 2-like [Nasonia vitripennis]
c103688.graph_c0	1.53591e-07	-5.37432	down	--	--	--	--	PREDICTED: SET and MYND domain-containing protein 4-like [Nasonia vitripennis]
c103686.graph_c0	4.37749e-05	-4.35192	down	--	--	--	--	hypothetical protein EAI_11867 [Harpegnathos saltator]
c103653.graph_c1	9.52378e-28	-8.74027	down	--	--	--	--	--
c103653.graph_c0	3.02888e-25	-10.0695	down	--	--	--	--	--
c103628.graph_c0	0.00741057	-1.33904	down	Posttranslational modification, protein turnover, chaperones	Molecular Function: ATP binding (GO:0005524);; Biological Process: protein folding (GO:0006457);; Biological Process: response to stress (GO:0006950);; Molecular Function: unfolded protein binding (GO:0051082);;	K04079|0|ame:411700|GB14494; heat shock protein 83-like; K04079 molecular chaperone HtpG (A)	Heat shock protein 83 GN=Hsp83 OS=Bombyx mori (Silk moth) PE=1 SV=1	PREDICTED: heat shock protein 83 [Microplitis demolitor]
c103618.graph_c0	9.72451e-06	-5.12488	down	--	Biological Process: regulation of cyclin-dependent protein serine/threonine kinase activity (GO:0000079);; Biological Process: regulation of transcription, DNA-templated (GO:0006355);; Molecular Function: protein kinase binding (GO:0019901);;	--	Cyclin-T GN=CycT OS=Drosophila melanogaster (Fruit fly) PE=1 SV=2	PREDICTED: cyclin-K-like [Megachile rotundata]
c103617.graph_c1	0.00624707	1.62289	up	--	--	--	--	--
c103614.graph_c1	0.00327587	1.49581	up	--	Molecular Function: tropomyosin binding (GO:0005523);; Cellular Component: cytoskeleton (GO:0005856);;	K10370|0|nvi:100117977|tropomodulin; K10370 tropomodulin (A)	Tropomodulin GN=unc-94 OS=Caenorhabditis elegans PE=1 SV=2	PREDICTED: LOW QUALITY PROTEIN: tropomodulin [Nasonia vitripennis]
c103614.graph_c0	0.00496897	2.0562	up	--	--	--	--	--
c103612.graph_c0	0.00191134	-1.94407	down	--	Biological Process: fatty acid biosynthetic process (GO:0006633);; Molecular Function: transferase activity, transferring acyl groups other than amino-acyl groups (GO:0016747);;	--	Gametogenetin-binding protein 2-like GN=CG2182 OS=Drosophila melanogaster (Fruit fly) PE=2 SV=3	PREDICTED: gametogenetin-binding protein 2-like [Nasonia vitripennis]
c103597.graph_c0	0.00618705	1.34111	up	Transcription	Molecular Function: phospholipase A2 activity (GO:0004623);; Molecular Function: calcium ion binding (GO:0005509);; Cellular Component: extracellular region (GO:0005576);; Biological Process: phospholipid metabolic process (GO:0006644);; Biological Process: lipid catabolic process (GO:0016042);; Molecular Function: NAD+ binding (GO:0070403);;	K11414|3.09257e-157|nvi:100678228|NAD-dependent protein deacetylase Sirt4; K11414 NAD-dependent deacetylase sirtuin 4 [EC:3.5.1.-] (A)	NAD-dependent protein deacetylase Sirt4 {ECO:0000255|HAMAP-Rule:MF_03161} (Precursor) GN=Sirt4 OS=Drosophila melanogaster (Fruit fly) PE=2 SV=2	PREDICTED: NAD-dependent protein deacetylase Sirt4 [Nasonia vitripennis]
c103594.graph_c1	3.11834e-05	-1.92576	down	--	--	--	--	--
c103586.graph_c0	0.000800472	1.83894	up	--	--	--	--	--
c103582.graph_c0	0.00110163	1.76153	up	--	--	--	--	--
c103568.graph_c0	0.00310299	-1.37373	down	Energy production and conversion	Molecular Function: methylmalonate-semialdehyde dehydrogenase (acylating) activity (GO:0004491);; Biological Process: oxidation-reduction process (GO:0055114);;	K00140|0|nvi:100114161|methylmalonate-semialdehyde dehydrogenase [acylating], mitochondrial; K00140 malonate-semialdehyde dehydrogenase (acetylating) / methylmalonate-semialdehyde dehydrogenase [EC:1.2.1.18 1.2.1.27] (A)	Probable methylmalonate-semialdehyde dehydrogenase [acylating], mitochondrial (Precursor) GN=AGAP002499 OS=Anopheles gambiae (African malaria mosquito) PE=3 SV=2	methylmalonate-semialdehyde dehydrogenase [acylating], mitochondrial [Nasonia vitripennis]
c103562.graph_c2	0.00112782	1.58711	up	--	--	--	--	--
c103558.graph_c0	8.72886e-05	-3.80342	down	--	--	--	--	PREDICTED: uncharacterized protein LOC100679276 [Nasonia vitripennis]
c103550.graph_c1	0.00118917	-2.50136	down	--	Biological Process: cellular process (GO:0009987);;	K10148|3.41931e-46|nvi:100116126|cellular tumor antigen p53-like; K10148 tumor protein p73 (A)	--	PREDICTED: cellular tumor antigen p53-like isoform X2 [Nasonia vitripennis]
c103535.graph_c0	1.95707e-05	-4.11193	down	General function prediction only	Biological Process: cell division (GO:0051301);;	K03363|0|nvi:100122406|fzy, CDC20; fizzy; K03363 cell division cycle 20, cofactor of APC complex (A)	Anaphase-promoting complex subunit cdc20 GN=cdc20 OS=Dictyostelium discoideum (Slime mold) PE=1 SV=1	PREDICTED: fizzy isoform X1 [Nasonia vitripennis]
c103512.graph_c0	0.000939636	-2.55585	down	--	--	--	--	--
c103506.graph_c0	6.97199e-07	-3.80456	down	--	--	K11501|0|nvi:100120447|centromere protein I-like; K11501 centromere protein I (A)	--	PREDICTED: centromere protein I-like isoform X1 [Nasonia vitripennis]
c103505.graph_c0	6.60332e-06	-5.60652	down	--	--	--	--	PREDICTED: uncharacterized protein LOC100680300 isoform X2 [Nasonia vitripennis]
c103495.graph_c2	0.000910021	-3.08636	down	--	--	--	--	PREDICTED: suppressor protein SRP40-like [Nasonia vitripennis]
c103495.graph_c1	2.25342e-12	-3.75673	down	--	--	--	--	PREDICTED: suppressor protein SRP40-like [Nasonia vitripennis]
c103494.graph_c0	0.000206972	-3.55172	down	Function unknown	--	--	Protein IMPACT homolog GN=Y52B11A.2 OS=Caenorhabditis elegans PE=3 SV=1	PREDICTED: protein IMPACT-like [Nasonia vitripennis]
c103493.graph_c0	0.0016103	-1.82471	down	--	Molecular Function: calcium ion binding (GO:0005509);; Cellular Component: integral component of membrane (GO:0016021);; Biological Process: transmembrane transport (GO:0055085);;	K14684|5.09918e-121|nvi:100119397|calcium-binding mitochondrial carrier protein SCaMC-2-A; K14684 solute carrier family 25 (mitochondrial phosphate transporter), member 23/24/25/41 (A)	Probable calcium-binding mitochondrial carrier CBG00135 GN=CBG00135 OS=Caenorhabditis briggsae PE=3 SV=1	PREDICTED: calcium-binding mitochondrial carrier protein SCaMC-2 isoform X1 [Nasonia vitripennis]
c103474.graph_c0	1.08719e-09	-8.94686	down	--	--	--	--	--
c103450.graph_c0	0.00138598	1.55321	up	--	--	--	--	PREDICTED: uncharacterized protein LOC100679629 isoform X1 [Nasonia vitripennis]
c103429.graph_c0	3.00934e-05	-4.32813	down	--	Cellular Component: nucleus (GO:0005634);; Biological Process: proteolysis (GO:0006508);; Molecular Function: peptidase activity (GO:0008233);;	--	--	PREDICTED: separin [Nasonia vitripennis]
c103400.graph_c1	0.00432427	-2.59	down	--	Biological Process: protein polyglutamylation (GO:0018095);;	K16599|0|nvi:100119308|probable tubulin polyglutamylase TTLL1; K16599 tubulin polyglutamylase TTLL1 [EC:6.-.-.-] (A)	Probable alpha-tubulin polyglutamylase Ttll1 GN=Ttll1 OS=Tetrahymena thermophila (strain SB210) PE=3 SV=1	PREDICTED: probable tubulin polyglutamylase TTLL1 isoform X1 [Nasonia vitripennis]
c103400.graph_c0	0.00541969	-1.59081	down	--	Molecular Function: structural constituent of ribosome (GO:0003735);; Cellular Component: mitochondrial large ribosomal subunit (GO:0005762);; Biological Process: translation (GO:0006412);;	K02892|5.82236e-60|nvi:100113938|39S ribosomal protein L23, mitochondrial; K02892 large subunit ribosomal protein L23 (A)	39S ribosomal protein L23, mitochondrial GN=mRpL23 OS=Drosophila melanogaster (Fruit fly) PE=2 SV=1	PREDICTED: 39S ribosomal protein L23, mitochondrial [Nasonia vitripennis]
c103393.graph_c0	0.000140975	-9.19525	down	--	--	--	--	PREDICTED: atrophin-1-like [Nasonia vitripennis]
c103384.graph_c0	1.17315e-07	-6.34264	down	--	--	--	Protein roadkill GN=rdx OS=Drosophila melanogaster (Fruit fly) PE=1 SV=2	PREDICTED: speckle-type POZ protein B-like [Nasonia vitripennis]
c103341.graph_c1	2.96176e-06	-2.03793	down	--	Molecular Function: methyltransferase activity (GO:0008168);; Biological Process: methylation (GO:0032259);;	K15190|1.05786e-139|nvi:100122154|probable RNA methyltransferase bin3; K15190 7SK snRNA methylphosphate capping enzyme [EC:2.1.1.-] (A)	Probable RNA methyltransferase CG1239 GN=CG1239 OS=Drosophila melanogaster (Fruit fly) PE=2 SV=2	PREDICTED: uncharacterized protein LOC100870180 [Apis florea]
c103334.graph_c0	1.06473e-16	Inf	down	--	Molecular Function: GTP binding (GO:0005525);; Biological Process: cell cycle (GO:0007049);; Cellular Component: septin complex (GO:0031105);;	K16939|0|nvi:100118723|septin-2; K16939 septin 6/8/11 (A)	Septin-2 GN=Sep2 OS=Drosophila melanogaster (Fruit fly) PE=2 SV=2	PREDICTED: septin-2-like [Megachile rotundata]
c103330.graph_c0	0.0062641	-2.81364	down	--	--	--	--	PREDICTED: broad-complex core protein isoforms 1/2/3/4/5 isoform X3 [Nasonia vitripennis]
c103324.graph_c0	0.000974387	-1.49619	down	--	Biological Process: intracellular signal transduction (GO:0035556);; Molecular Function: metal ion binding (GO:0046872);;	--	Differentially expressed in FDCP 8 homolog GN=CG11534 OS=Drosophila melanogaster (Fruit fly) PE=1 SV=1	PREDICTED: differentially expressed in FDCP 8 homolog [Nasonia vitripennis]
c103316.graph_c0	0.00703186	-1.60112	down	Replication, recombination and repair	Molecular Function: ATP binding (GO:0005524);; Biological Process: mismatch repair (GO:0006298);; Molecular Function: mismatched DNA binding (GO:0030983);;	K08737|0|nvi:100115613|Msh6; probable DNA mismatch repair protein Msh6; K08737 DNA mismatch repair protein MSH6 (A)	Probable DNA mismatch repair protein Msh6 GN=Msh6 OS=Drosophila melanogaster (Fruit fly) PE=1 SV=2	PREDICTED: probable DNA mismatch repair protein Msh6 [Nasonia vitripennis]
c103312.graph_c0	0.00556395	-4.47576	down	Replication, recombination and repair	Molecular Function: DNA binding (GO:0003677);; Molecular Function: DNA helicase activity (GO:0003678);; Molecular Function: ATP binding (GO:0005524);; Cellular Component: nucleus (GO:0005634);; Biological Process: DNA replication initiation (GO:0006270);; Biological Process: DNA duplex unwinding (GO:0032508);; Cellular Component: MCM complex (GO:0042555);;	K02541|0|nvi:100115910|DNA replication licensing factor Mcm3; K02541 DNA replication licensing factor MCM3 [EC:3.6.4.12] (A)	DNA replication licensing factor Mcm3 GN=Mcm3 OS=Drosophila melanogaster (Fruit fly) PE=1 SV=1	PREDICTED: DNA replication licensing factor Mcm3 [Nasonia vitripennis]
c103311.graph_c0	3.26471e-22	-5.99932	down	--	--	K16732|0|nvi:100120202|protein regulator of cytokinesis 1-like; K16732 protein regulator of cytokinesis 1 (A)	--	PREDICTED: protein regulator of cytokinesis 1-like isoform X1 [Nasonia vitripennis]
c103276.graph_c0	2.71435e-16	-6.98593	down	--	Biological Process: negative regulation of transcription from RNA polymerase II promoter (GO:0000122);; Molecular Function: RNA polymerase II distal enhancer sequence-specific DNA binding (GO:0000980);; Molecular Function: RNA polymerase II activating transcription factor binding (GO:0001102);; Molecular Function: RNA polymerase II transcription coactivator activity (GO:0001105);; Biological Proc…	K04676|5.95166e-178|der:Dere_GG24457|GG24457 gene product from transcript GG24457-RA; K04676 mothers against decapentaplegic homolog 1 (A)	Protein mothers against dpp GN=Mad OS=Drosophila melanogaster (Fruit fly) PE=1 SV=1	GG24457 [Drosophila erecta]
c103257.graph_c0	2.45417e-05	-5.39254	down	Amino acid transport and metabolism	--	--	Kynurenine--oxoglutarate transaminase GN=ccbl OS=Dictyostelium discoideum (Slime mold) PE=3 SV=1	PREDICTED: kynurenine--oxoglutarate transaminase 1-like [Nasonia vitripennis]
c103249.graph_c0	0.000813833	-3.38869	down	--	--	--	--	PREDICTED: low-density lipoprotein receptor-related protein 2-like [Nasonia vitripennis]
c103240.graph_c0	0.00229057	1.62228	up	--	Molecular Function: calcium channel activity (GO:0005262);; Cellular Component: integral component of membrane (GO:0016021);; Biological Process: calcium ion transmembrane transport (GO:0070588);;	K05328|0|nvi:100121718|TRP; transient receptor potential protein; K05328 transient receptor potential cation channel subfamily C, invertebrate (A)	Transient receptor potential protein GN=trp OS=Drosophila melanogaster (Fruit fly) PE=1 SV=3	PREDICTED: transient receptor potential protein [Nasonia vitripennis]
c103232.graph_c0	0.00704266	1.23694	up	Lipid transport and metabolism	Biological Process: cell adhesion (GO:0007155);; Cellular Component: membrane (GO:0016020);;	--	Neuroligin-1 (Precursor) GN=nlg-1 OS=Caenorhabditis elegans PE=1 SV=1	PREDICTED: neuroligin-1 [Nasonia vitripennis]
c103219.graph_c1	0.00868875	2.72897	up	--	--	--	--	--
c103213.graph_c0	0.00519251	-2.01837	down	Cell cycle control, cell division, chromosome partitioning	Molecular Function: ATP binding (GO:0005524);; Cellular Component: nucleus (GO:0005634);; Cellular Component: chromosome (GO:0005694);; Biological Process: DNA repair (GO:0006281);; Biological Process: DNA recombination (GO:0006310);; Biological Process: sister chromatid cohesion (GO:0007062);; Biological Process: chromosome condensation (GO:0030261);;	K06675|0|nvi:100120069|NV_30441, hmm365234, smc4; structural maintenance of chromosomes 4; K06675 structural maintenance of chromosome 4 (A)	Structural maintenance of chromosomes protein 4 GN=smc4 OS=Dictyostelium discoideum (Slime mold) PE=3 SV=1	PREDICTED: structural maintenance of chromosomes protein 4 [Nasonia vitripennis]
c103206.graph_c0	2.09099e-08	-3.81581	down	--	--	--	--	PREDICTED: uncharacterized protein LOC100679481 isoform X2 [Nasonia vitripennis]
c103199.graph_c0	2.7024e-18	-4.6419	down	--	Biological Process: single-organism cellular process (GO:0044763);;	K16812|8.77022e-110|nvi:100123133|targeting protein for Xklp2 homolog; K16812 targeting protein for Xklp2 (A)	--	PREDICTED: targeting protein for Xklp2 homolog isoform X1 [Nasonia vitripennis]
c103195.graph_c0	0.00931825	2.81061	up	Energy production and conversion	Biological Process: tricarboxylic acid cycle (GO:0006099);; Molecular Function: oxidoreductase activity, acting on the CH-CH group of donors (GO:0016627);; Biological Process: electron transport chain (GO:0022900);; Molecular Function: flavin adenine dinucleotide binding (GO:0050660);;	K00234|0|nvi:100119112|succinate dehydrogenase [ubiquinone] flavoprotein subunit, mitochondrial-like; K00234 succinate dehydrogenase (ubiquinone) flavoprotein subunit [EC:1.3.5.1] (A)	Succinate dehydrogenase [ubiquinone] flavoprotein subunit, mitochondrial (Precursor) GN=SdhA OS=Drosophila melanogaster (Fruit fly) PE=2 SV=3	PREDICTED: LOW QUALITY PROTEIN: succinate dehydrogenase [ubiquinone] flavoprotein subunit, mitochondrial-like [Nasonia vitripennis]
c103186.graph_c0	0.00491712	1.38834	up	--	Molecular Function: calcium ion binding (GO:0005509);;	K11583|0|nvi:100120575|probable GPI-anchored adhesin-like protein PGA55; K11583 serine/threonine-protein phosphatase 2A regulatory subunit B'' (A)	--	PREDICTED: uncharacterized protein LOC100120575 isoform X1 [Nasonia vitripennis]
c103182.graph_c1	0.00268392	-1.53844	down	--	--	K14323|0|nvi:100121042|protein CASC3-like; K14323 protein CASC3 (A)	--	PREDICTED: protein CASC3-like isoform X1 [Nasonia vitripennis]
c103149.graph_c0	0.00140111	-1.87917	down	Lipid transport and metabolism	--	--	Esterase E4 (Precursor) OS=Myzus persicae (Green peach aphid) PE=1 SV=1	PREDICTED: liver carboxylesterase 1 isoform X1 [Nasonia vitripennis]
c103104.graph_c0	2.15065e-06	-6.44701	down	--	--	--	--	--
c103069.graph_c3	3.54816e-05	-3.51147	down	--	--	--	--	--
c103046.graph_c0	0.00460517	-1.63591	down	General function prediction only	--	--	Phosphatidylethanolamine-binding protein homolog F40A3.3 GN=F40A3.3 OS=Caenorhabditis elegans PE=3 SV=1	PREDICTED: protein D1-like [Nasonia vitripennis]
c103045.graph_c0	0.00369417	1.97351	up	--	--	--	--	PREDICTED: LOW QUALITY PROTEIN: otopetrin-3-like [Nasonia vitripennis]
c103044.graph_c0	4.1792e-11	-4.70913	down	Cytoskeleton	Molecular Function: nucleotide binding (GO:0000166);; Cellular Component: microtubule cytoskeleton (GO:0015630);; Cellular Component: protein complex (GO:0043234);; Cellular Component: cytoskeletal part (GO:0044430);;	K10405|0|nvi:100122738|kinesin-14; kinesin 14; K10405 kinesin family member C1 (A)	Protein claret segregational GN=ncd OS=Drosophila melanogaster (Fruit fly) PE=1 SV=1	PREDICTED: protein claret segregational [Nasonia vitripennis]
c103027.graph_c0	1.0016e-16	-8.00979	down	General function prediction only	Molecular Function: nucleic acid binding (GO:0003676);; Molecular Function: metal ion binding (GO:0046872);;	--	Transcription factor hamlet GN=ham OS=Drosophila melanogaster (Fruit fly) PE=2 SV=1	PREDICTED: zinc finger protein 672-like [Megachile rotundata]
c103017.graph_c0	4.85076e-05	4.87648	up	--	--	--	--	hypothetical protein G5I_11127 [Acromyrmex echinatior]
c103011.graph_c1	0.00913207	1.29743	up	--	Molecular Function: DNA binding (GO:0003677);; Molecular Function: RNA binding (GO:0003723);; Biological Process: RNA metabolic process (GO:0016070);;	--	--	PREDICTED: CBP80/20-dependent translation initiation factor isoform X1 [Nasonia vitripennis]
c103011.graph_c0	0.00603996	-1.27479	down	--	Molecular Function: nucleic acid binding (GO:0003676);;	--	Nucleoplasmin-like protein GN=Nlp OS=Drosophila melanogaster (Fruit fly) PE=1 SV=1	PREDICTED: nucleoplasmin-like protein-like isoform X4 [Apis mellifera]
c102996.graph_c0	7.84998e-18	-6.59318	down	General function prediction only	--	--	--	PREDICTED: cell division cycle 20.5, cofactor of APC complex isoform X2 [Nasonia vitripennis]
c102973.graph_c1	0.0044405	-2.4238	down	--	--	--	--	--
c102969.graph_c0	0.00160031	2.19098	up	--	--	--	--	--
c102962.graph_c0	8.8866e-15	-9.40459	down	--	--	--	--	--
c102945.graph_c0	1.35875e-15	-5.7904	down	--	--	--	Pacifastin-like protease inhibitor cvp4 (Precursor) OS=Pimpla hypochondriaca (Parasitoid wasp) PE=1 SV=1	PREDICTED: uncharacterized protein LOC100678556 [Nasonia vitripennis]
c102943.graph_c0	4.07071e-05	-3.22463	down	--	--	--	--	--
c102934.graph_c0	7.65267e-07	6.47945	up	--	--	--	--	--
c102916.graph_c2	2.80054e-23	-5.66274	down	--	--	--	Vitellogenin (Precursor) GN=Vg OS=Apis mellifera (Honeybee) PE=1 SV=1	PREDICTED: vitellogenin-like [Nasonia vitripennis]
c102916.graph_c1	3.60426e-26	-7.30411	down	--	Molecular Function: lipid transporter activity (GO:0005319);; Biological Process: lipid transport (GO:0006869);;	--	Vitellogenin-1 {ECO:0000303|PubMed:11249942} (Precursor) OS=Solenopsis invicta (Red imported fire ant) PE=2 SV=1	PREDICTED: vitellogenin-like [Nasonia vitripennis]
c102903.graph_c0	0.00628086	1.81802	up	--	--	--	--	--
c102893.graph_c2	0.00404481	1.87212	up	--	--	--	--	--
c102884.graph_c0	0.00264015	1.79124	up	--	--	--	--	PREDICTED: tumor necrosis factor receptor superfamily member 14-like [Nasonia vitripennis]
c102866.graph_c0	7.88745e-15	-8.65209	down	--	--	--	--	PREDICTED: uncharacterized protein LOC100118466 isoform X1 [Nasonia vitripennis]
c102860.graph_c1	6.41851e-10	Inf	down	--	Molecular Function: nucleic acid binding (GO:0003676);; Molecular Function: metal ion binding (GO:0046872);;	--	Transcription factor btd GN=btd OS=Drosophila melanogaster (Fruit fly) PE=2 SV=1	PREDICTED: transcription factor Sp3-like [Megachile rotundata]
c102860.graph_c0	2.36708e-05	-5.30384	down	General function prediction only	Molecular Function: nucleic acid binding (GO:0003676);; Molecular Function: metal ion binding (GO:0046872);;	--	Transcription factor btd GN=btd OS=Drosophila melanogaster (Fruit fly) PE=2 SV=1	PREDICTED: transcription factor Sp3-like [Megachile rotundata]
c102829.graph_c0	0.00912876	Inf	down	Amino acid transport and metabolism	--	--	--	PREDICTED: gamma-glutamyltranspeptidase 1 [Nasonia vitripennis]
c102817.graph_c2	0.000275176	-3.7088	down	--	--	--	--	PREDICTED: uncharacterized protein LOC100119984 isoform X4 [Nasonia vitripennis]
c102817.graph_c1	2.81801e-05	-4.7996	down	--	--	--	--	PREDICTED: uncharacterized protein LOC100119984 isoform X4 [Nasonia vitripennis]
c102810.graph_c0	4.7036e-22	Inf	down	--	--	--	--	--
c102806.graph_c1	6.24102e-06	-2.02792	down	--	Molecular Function: hydrolase activity (GO:0016787);;	--	Serine protease easter (Precursor) GN=ea OS=Drosophila melanogaster (Fruit fly) PE=1 SV=3	serine protease 16 precursor [Nasonia vitripennis]
c102803.graph_c1	2.19246e-07	-2.36251	down	General function prediction only	Biological Process: nitrogen compound metabolic process (GO:0006807);; Molecular Function: hydrolase activity, acting on carbon-nitrogen (but not peptide) bonds (GO:0016810);;	K01431|1.3997e-148|nvi:100113520|beta-ureidopropionase-like; K01431 beta-ureidopropionase [EC:3.5.1.6] (A)	Beta-ureidopropionase GN=pyd3 OS=Dictyostelium discoideum (Slime mold) PE=1 SV=1	PREDICTED: beta-ureidopropionase-like [Nasonia vitripennis]
c102803.graph_c0	1.04163e-12	-3.11426	down	--	Molecular Function: hydrolase activity, acting on carbon-nitrogen (but not peptide) bonds (GO:0016810);;	K01431|2.16404e-96|nvi:100113520|beta-ureidopropionase-like; K01431 beta-ureidopropionase [EC:3.5.1.6] (A)	Beta-ureidopropionase GN=pyd3 OS=Dictyostelium discoideum (Slime mold) PE=1 SV=1	PREDICTED: beta-ureidopropionase-like [Nasonia vitripennis]
c102802.graph_c1	0.00903872	-1.6265	down	--	--	K10750|6.8713e-168|nvi:100115056|chromatin assembly factor 1 subunit A-like; K10750 chromatin assembly factor 1 subunit A (A)	--	PREDICTED: chromatin assembly factor 1 subunit A-like isoform X1 [Nasonia vitripennis]
c102802.graph_c0	0.00050414	-2.56117	down	--	--	K10750|3.75435e-38|nvi:100115056|chromatin assembly factor 1 subunit A-like; K10750 chromatin assembly factor 1 subunit A (A)	--	PREDICTED: chromatin assembly factor 1 subunit A-like isoform X1 [Nasonia vitripennis]
c102797.graph_c0	0.00127402	-2.99146	down	Function unknown	--	--	Protein slit C-product (Precursor) GN=sli OS=Drosophila melanogaster (Fruit fly) PE=1 SV=2	PREDICTED: insulin-like growth factor-binding protein complex acid labile subunit isoform X2 [Nasonia vitripennis]
c102779.graph_c0	3.18278e-08	-3.86469	down	--	--	--	--	PREDICTED: G2/mitotic-specific cyclin-B-like [Nasonia vitripennis]
c102777.graph_c0	0.000968471	1.70373	up	--	--	--	--	--
c102776.graph_c1	0.000610144	-1.7404	down	--	Biological Process: positive regulation of autophagy (GO:0010508);;	--	UV radiation resistance-associated gene protein GN=Uvrag OS=Drosophila melanogaster (Fruit fly) PE=1 SV=1	PREDICTED: uncharacterized protein LOC100123389 [Nasonia vitripennis]
c102771.graph_c0	0.00429466	1.34845	up	--	--	--	Protein turtle GN=tutl OS=Drosophila melanogaster (Fruit fly) PE=1 SV=2	PREDICTED: LOW QUALITY PROTEIN: protein turtle [Nasonia vitripennis]
c102763.graph_c0	1.43284e-52	-9.23139	down	Function unknown	--	--	Venom allergen 3 (Precursor) OS=Solenopsis invicta (Red imported fire ant) PE=1 SV=2	PREDICTED: venom allergen 5-like [Nasonia vitripennis]
c102741.graph_c0	6.92699e-30	-5.99643	down	--	Molecular Function: RNA binding (GO:0003723);; Molecular Function: zinc ion binding (GO:0008270);;	K18741|3.27364e-76|nvi:100104006|nanos, nos; protein nanos; K18741 protein nanos 1 (A)	Protein nanos GN=nos OS=Drosophila melanogaster (Fruit fly) PE=1 SV=1	protein nanos [Nasonia vitripennis]
c102739.graph_c0	1.85467e-06	-3.52595	down	--	Biological Process: regulation of cyclin-dependent protein serine/threonine kinase activity (GO:0000079);; Cellular Component: nucleus (GO:0005634);; Molecular Function: protein kinase binding (GO:0019901);; Biological Process: cell division (GO:0051301);;	K06626|0|nvi:100114765|cycE; G1/S-specific cyclin-E1; K06626 cyclin E (A)	G1/S-specific cyclin-E GN=CycE OS=Drosophila melanogaster (Fruit fly) PE=1 SV=2	PREDICTED: G1/S-specific cyclin-E1 [Nasonia vitripennis]
c102717.graph_c0	3.96902e-08	-7.48537	down	--	--	--	--	PREDICTED: uncharacterized protein LOC100119111 isoform X1 [Nasonia vitripennis]
c102716.graph_c0	2.03287e-05	Inf	up	--	--	--	--	PREDICTED: testicular haploid expressed gene protein-like isoform X2 [Nasonia vitripennis]
c102708.graph_c0	0.00195592	-3.1556	down	--	--	--	--	hypothetical protein SINV_03639 [Solenopsis invicta]
c102692.graph_c0	7.70499e-19	-4.22966	down	--	--	--	--	PREDICTED: spidroin-2-like [Nasonia vitripennis]
c102671.graph_c0	1.73339e-37	-10.4367	down	--	--	--	Vitellogenin (Precursor) GN=Vg OS=Apis mellifera (Honeybee) PE=1 SV=1	vitellogenin [Pteromalus puparum]
c102664.graph_c1	0.00103752	-1.72967	down	--	--	--	Basement membrane proteoglycan (Precursor) GN=unc-52 OS=Caenorhabditis elegans PE=1 SV=2	PREDICTED: basement membrane-specific heparan sulfate proteoglycan core protein isoform X2 [Nasonia vitripennis]
c102643.graph_c0	0.00183984	-1.89376	down	Inorganic ion transport and metabolism	Molecular Function: UDP-glucose:glycoprotein glucosyltransferase activity (GO:0003980);; Biological Process: protein glycosylation (GO:0006486);; Biological Process: cation transport (GO:0006812);; Molecular Function: cation transmembrane transporter activity (GO:0008324);; Cellular Component: integral component of membrane (GO:0016021);; Biological Process: transmembrane transport (GO:0055085);;…	K14689|0|nvi:100123888|zinc transporter 2-like; K14689 solute carrier family 30 (zinc transporter), member 2 (A)	Probable zinc transporter protein DDB_G0283629 GN=DDB_G0283629 OS=Dictyostelium discoideum (Slime mold) PE=3 SV=1	PREDICTED: zinc transporter 2-like isoform X1 [Nasonia vitripennis]
c102627.graph_c0	1.05825e-09	-4.00313	down	Secondary metabolites biosynthesis, transport and catabolism	Molecular Function: oxidoreductase activity (GO:0016491);; Molecular Function: metal ion binding (GO:0046872);;	K10722|0|nvi:100123871|CYP315A1; cytochrome P450 315a1, mitochondrial; K10722 ecdysteroid 2-hydroxylase (A)	Cytochrome P450 315a1, mitochondrial (Precursor) GN=sad OS=Drosophila melanogaster (Fruit fly) PE=2 SV=1	PREDICTED: cytochrome P450 315a1, mitochondrial [Nasonia vitripennis]
c102616.graph_c0	0.00564173	-1.32653	down	--	--	K18743|5.64631e-151|nvi:100678378|caprin homolog; K18743 caprin-1 (A)	Caprin homolog GN=Capr OS=Drosophila melanogaster (Fruit fly) PE=1 SV=1	PREDICTED: caprin homolog [Nasonia vitripennis]
c102615.graph_c0	0.00435846	1.42525	up	--	--	--	--	--
c102606.graph_c0	4.50097e-15	-9.052	down	--	Molecular Function: DNA binding (GO:0003677);;	--	Homeobox protein extradenticle OS=Anopheles gambiae (African malaria mosquito) PE=3 SV=2	PREDICTED: homeobox protein extradenticle-like [Nasonia vitripennis]
c102604.graph_c1	4.03779e-05	-1.91061	down	--	Biological Process: single-organism cellular process (GO:0044763);; Biological Process: regulation of cellular process (GO:0050794);;	--	Rac guanine nucleotide exchange factor JJ GN=gxcJJ OS=Dictyostelium discoideum (Slime mold) PE=1 SV=1	PREDICTED: protein ECT2 isoform X3 [Nasonia vitripennis]
c102602.graph_c0	0.00613746	-1.36379	down	--	--	--	Retinal-binding protein OS=Todarodes pacificus (Japanese flying squid) PE=1 SV=2	PREDICTED: alpha-tocopherol transfer protein-like [Nasonia vitripennis]
c102600.graph_c0	5.73929e-20	-4.59224	down	--	--	--	--	--
c102580.graph_c0	3.506e-08	-3.85328	down	--	--	K16831|0|nvi:100169976|Bora; aurora borealis; K16831 protein aurora borealis (A)	Protein aurora borealis GN=bora OS=Drosophila pseudoobscura pseudoobscura (Fruit fly) PE=3 SV=2	protein aurora borealis [Nasonia vitripennis]
c102578.graph_c0	0.00010387	5.14121	up	--	--	--	--	PREDICTED: uncharacterized protein LOC100120476 isoform X1 [Nasonia vitripennis]
c102561.graph_c0	0.00183984	2.19883	up	General function prediction only	Molecular Function: binding (GO:0005488);;	--	Serendipity locus protein H-1 GN=wdn OS=Drosophila melanogaster (Fruit fly) PE=1 SV=2	PREDICTED: zinc finger protein 26-like [Nasonia vitripennis]
c102560.graph_c0	0.00013035	-2.77504	down	--	--	--	--	PREDICTED: uncharacterized protein LOC100679010 [Nasonia vitripennis]
c102550.graph_c0	0.00136195	2.7832	up	--	--	--	--	PREDICTED: uncharacterized protein LOC100678728 [Nasonia vitripennis]
c102546.graph_c1	3.40251e-09	-2.58295	down	Amino acid transport and metabolism	--	K11140|0|nvi:100122611|uncharacterized LOC100122611; K11140 aminopeptidase N [EC:3.4.11.2] (A)	Aminopeptidase N (Precursor) GN=APN1 OS=Plutella xylostella (Diamondback moth) PE=1 SV=1	PREDICTED: uncharacterized protein LOC100122611 [Nasonia vitripennis]
c102537.graph_c0	0.0004355	-6.4612	down	--	--	--	--	PREDICTED: uncharacterized protein LOC103316723 [Nasonia vitripennis]
c102512.graph_c0	1.41908e-07	-3.17386	down	--	--	--	Protein cappuccino GN=capu OS=Drosophila melanogaster (Fruit fly) PE=1 SV=2	PREDICTED: formin-2 [Nasonia vitripennis]
c102495.graph_c0	0.000904929	4.03263	up	--	--	--	--	PREDICTED: uncharacterized protein LOC100679413 isoform X1 [Nasonia vitripennis]
c102494.graph_c0	4.04244e-21	-5.9963	down	Cytoskeleton	Molecular Function: microtubule motor activity (GO:0003777);; Molecular Function: ATP binding (GO:0005524);; Cellular Component: kinesin complex (GO:0005871);; Cellular Component: microtubule (GO:0005874);; Biological Process: microtubule-based movement (GO:0007018);; Molecular Function: microtubule binding (GO:0008017);;	K17387|0|nvi:100117806|kinesin-6; kinesin 6; K17387 kinesin family member 23 (A)	Kinesin-like protein subito GN=sub OS=Drosophila melanogaster (Fruit fly) PE=1 SV=1	PREDICTED: kinesin-like protein KIF23 [Nasonia vitripennis]
c102488.graph_c0	3.21131e-18	Inf	down	--	Molecular Function: catalytic activity (GO:0003824);;	--	Serine proteinase stubble catalytic chain GN=Sb OS=Drosophila melanogaster (Fruit fly) PE=2 SV=2	serine protease precursor [Nasonia vitripennis]
c102485.graph_c0	0.00236973	2.66648	up	--	Molecular Function: phosphatidylinositol phospholipase C activity (GO:0004435);; Molecular Function: signal transducer activity (GO:0004871);; Molecular Function: calcium ion binding (GO:0005509);; Biological Process: lipid metabolic process (GO:0006629);; Biological Process: intracellular signal transduction (GO:0035556);;	--	1-phosphatidylinositol 4,5-bisphosphate phosphodiesterase GN=norpA OS=Drosophila melanogaster (Fruit fly) PE=1 SV=4	PREDICTED: 1-phosphatidylinositol 4,5-bisphosphate phosphodiesterase-like, partial [Nasonia vitripennis]
c102476.graph_c0	0.0014199	2.52379	up	--	--	--	--	--
c102468.graph_c0	3.42674e-05	4.96766	up	--	--	--	--	PREDICTED: uncharacterized protein LOC103315576 isoform X2 [Nasonia vitripennis]
c102441.graph_c1	0.00348799	2.64228	up	--	--	--	--	--
c102440.graph_c0	8.931e-11	-6.19223	down	--	Molecular Function: nucleic acid binding (GO:0003676);; Biological Process: transcription, DNA-templated (GO:0006351);;	K03138|1.201e-68|nvi:100123514|general transcription factor IIF subunit 1; K03138 transcription initiation factor TFIIF subunit alpha (A)	General transcription factor IIF subunit 1 GN=TfIIFalpha OS=Drosophila melanogaster (Fruit fly) PE=1 SV=3	PREDICTED: general transcription factor IIF subunit 1 isoform X1 [Nasonia vitripennis]
c102412.graph_c0	2.04572e-10	Inf	down	--	--	--	Lipase 3 (Precursor) GN=Lip3 OS=Drosophila melanogaster (Fruit fly) PE=2 SV=1	PREDICTED: lipase 3-like [Nasonia vitripennis]
c102403.graph_c6	4.19121e-05	2.2291	up	--	--	--	--	--
c102389.graph_c0	3.167e-07	Inf	down	--	--	--	--	--
c102366.graph_c0	0.00934326	1.55915	up	--	--	--	Putative inorganic phosphate cotransporter GN=Picot OS=Drosophila ananassae (Fruit fly) PE=3 SV=1	PREDICTED: putative inorganic phosphate cotransporter [Nasonia vitripennis]
c102362.graph_c0	1.39749e-06	Inf	down	--	--	--	--	--
c102346.graph_c1	9.85089e-16	-5.40598	down	--	--	--	--	PREDICTED: probable GPI-anchored adhesin-like protein PGA55 [Nasonia vitripennis]
c102346.graph_c0	1.48914e-18	-7.73444	down	--	--	--	--	PREDICTED: probable GPI-anchored adhesin-like protein PGA55 [Nasonia vitripennis]
c102301.graph_c0	2.90527e-06	-4.75765	down	--	--	--	--	--
c102291.graph_c0	0.000356618	-3.73296	down	--	--	--	--	PREDICTED: uncharacterized protein LOC100679659 isoform X2 [Nasonia vitripennis]
c102283.graph_c0	6.18524e-08	-3.47325	down	General function prediction only	--	--	Ankyrin repeat, PH and SEC7 domain containing protein secG GN=secG OS=Dictyostelium discoideum (Slime mold) PE=2 SV=1	PREDICTED: ankyrin-3-like [Nasonia vitripennis]
c102261.graph_c0	0.00325616	1.48269	up	--	--	--	--	--
c102187.graph_c0	0.00103694	1.77817	up	--	Molecular Function: ionotropic glutamate receptor activity (GO:0004970);; Molecular Function: extracellular-glutamate-gated ion channel activity (GO:0005234);; Cellular Component: plasma membrane (GO:0005886);; Biological Process: ion transport (GO:0006811);; Cellular Component: integral component of membrane (GO:0016021);; Cellular Component: cell junction (GO:0030054);; Biological Process: iono…	K05208|0|ame:406079|Nmdar1, GB19253, NR1; NMDA receptor 1; K05208 glutamate receptor ionotropic, NMDA 1 (A)	Glutamate [NMDA] receptor subunit 1 {ECO:0000250|UniProtKB:Q24418} (Precursor) OS=Drosophila grimshawi (Fruit fly) PE=3 SV=1	PREDICTED: glutamate [NMDA] receptor subunit 1 [Harpegnathos saltator]
c102169.graph_c1	0.00812945	-5.35589	down	Nucleotide transport and metabolism	--	--	Adenosine deaminase AGSA (Precursor) OS=Aplysia californica (California sea hare) PE=1 SV=2	PREDICTED: adenosine deaminase CECR1-like isoform X1 [Nasonia vitripennis]
c102120.graph_c0	0.00359873	-1.70972	down	--	Molecular Function: RNA binding (GO:0003723);; Molecular Function: ATP binding (GO:0005524);; Molecular Function: ATP-dependent helicase activity (GO:0008026);;	K17043|0|nvi:100118431|probable ATP-dependent RNA helicase DDX43; K17043 ATP-dependent RNA helicase DDX43 [EC:3.6.4.13] (A)	Probable ATP-dependent RNA helicase ddx17 GN=ddx17 OS=Dictyostelium discoideum (Slime mold) PE=3 SV=1	PREDICTED: probable ATP-dependent RNA helicase DDX43 [Nasonia vitripennis]
c102113.graph_c0	5.50159e-18	6.19562	up	--	--	--	--	PREDICTED: formin-like protein 14 isoform X2 [Nasonia vitripennis]
c102102.graph_c0	5.19098e-13	-5.5612	down	--	--	--	--	PREDICTED: uncharacterized protein LOC100678166 isoform X1 [Nasonia vitripennis]
c102092.graph_c1	2.00266e-08	-8.53264	down	--	--	--	--	--
c102074.graph_c1	0.00918438	1.96373	up	--	Biological Process: fatty acid biosynthetic process (GO:0006633);; Cellular Component: integral component of membrane (GO:0016021);; Molecular Function: acyl-CoA delta11-desaturase activity (GO:0017105);; Biological Process: oxidation-reduction process (GO:0055114);;	--	Acyl-CoA Delta(11) desaturase OS=Spodoptera littoralis (Egyptian cotton leafworm) PE=1 SV=1	PREDICTED: acyl-CoA desaturase isoform X2 [Nasonia vitripennis]
c102070.graph_c0	0.00947843	2.02534	up	Cell wall/membrane/envelope biogenesis	--	--	Peptidoglycan-recognition protein SC2 (Precursor) GN=PGRP-SC2 OS=Drosophila melanogaster (Fruit fly) PE=2 SV=1	PREDICTED: peptidoglycan-recognition protein SC2-like [Nasonia vitripennis]
c102051.graph_c0	1.65485e-19	-7.28292	down	--	--	--	--	--
c102045.graph_c0	0.00787331	1.3972	up	--	--	--	--	--
c102042.graph_c1	0.00417975	1.93246	up	Replication, recombination and repair	Molecular Function: binding (GO:0005488);;	--	Endonuclease GN=pol OS=Drosophila melanogaster (Fruit fly) PE=3 SV=1	PREDICTED: uncharacterized protein LOC100906527 [Metaseiulus occidentalis]
c102040.graph_c0	0.00106354	-3.66147	down	--	--	--	--	--
c102020.graph_c2	2.22537e-05	Inf	up	--	--	--	--	--
c102004.graph_c0	0.00047398	-2.40407	down	--	--	--	--	--
c101947.graph_c0	0.000298201	-3.02995	down	--	--	K14304|0|nvi:100120346|nuclear pore complex protein Nup85; K14304 nuclear pore complex protein Nup85 (A)	Nuclear pore complex protein nup85 GN=nup85 OS=Dictyostelium discoideum (Slime mold) PE=3 SV=1	PREDICTED: nuclear pore complex protein Nup85 [Nasonia vitripennis]
c101912.graph_c0	0.00168025	-1.78967	down	--	Molecular Function: sphingomyelin phosphodiesterase D activity (GO:0050290);;	K12353|0|nvi:100123169|sphingomyelin phosphodiesterase 4; K12353 sphingomyelin phosphodiesterase 4 [EC:3.1.4.12] (A)	--	PREDICTED: sphingomyelin phosphodiesterase 4 [Nasonia vitripennis]
c101902.graph_c0	7.57103e-07	-2.15968	down	Energy production and conversion	Molecular Function: phosphatase activity (GO:0016791);; Cellular Component: intracellular part (GO:0044424);; Molecular Function: metal ion binding (GO:0046872);; Biological Process: L-methionine salvage (GO:0071267);;	K09880|1.69447e-150|nvi:100117336|enolase-phosphatase E1-like; K09880 enolase-phosphatase E1 [EC:3.1.3.77] (A)	Enolase-phosphatase E1 {ECO:0000255|HAMAP-Rule:MF_03117} GN=AGAP003331 OS=Anopheles gambiae (African malaria mosquito) PE=3 SV=5	PREDICTED: enolase-phosphatase E1-like [Nasonia vitripennis]
c101899.graph_c0	5.59451e-18	-7.68625	down	--	--	--	--	PREDICTED: putative uncharacterized protein DDB_G0271606 isoform X3 [Nasonia vitripennis]
c101872.graph_c0	1.18284e-08	-3.81665	down	--	Molecular Function: nucleotide binding (GO:0000166);;	K02213|0|nvi:100121417|cell division control protein 6 homolog; K02213 cell division control protein 6 (A)	Origin recognition complex subunit 1 GN=Orc1 OS=Drosophila melanogaster (Fruit fly) PE=1 SV=2	PREDICTED: cell division control protein 6 homolog [Nasonia vitripennis]
c101871.graph_c0	4.21546e-08	-7.30658	down	Posttranslational modification, protein turnover, chaperones	Molecular Function: ubiquitin-protein transferase activity (GO:0004842);; Biological Process: protein ubiquitination (GO:0016567);; Biological Process: neurogenesis (GO:0022008);;	K02207|7.96038e-92|xtr:780159|ube2r2, cdc34b, e2-cdc34b, ubc3b; ubiquitin-conjugating enzyme E2R 2 (EC:6.3.2.19); K02207 ubiquitin-conjugating enzyme E2 R [EC:6.3.2.19] (A)	Probable ubiquitin-conjugating enzyme E2 7 GN=ubc-7 OS=Caenorhabditis elegans PE=1 SV=1	hypothetical protein CAPTEDRAFT_183711 [Capitella teleta]
c101869.graph_c0	1.24045e-17	-5.63773	down	--	Molecular Function: protein serine/threonine kinase activity (GO:0004674);; Molecular Function: ATP binding (GO:0005524);; Biological Process: protein phosphorylation (GO:0006468);;	K06631|0|nvi:100120719|NV_30481, Plk1; serine/threonine-protein kinase polo; K06631 polo-like kinase 1 [EC:2.7.11.21] (A)	Serine/threonine-protein kinase polo GN=polo OS=Drosophila melanogaster (Fruit fly) PE=1 SV=2	PREDICTED: LOW QUALITY PROTEIN: serine/threonine-protein kinase polo [Nasonia vitripennis]
c101867.graph_c0	0.0010008	-3.75082	down	--	--	--	--	--
c101860.graph_c0	2.09188e-06	-4.84931	down	--	--	--	--	--
c101848.graph_c0	0.000201278	-2.0255	down	General function prediction only	--	K14546|0|nvi:100120915|WD repeat-containing protein 43-like; K14546 U3 small nucleolar RNA-associated protein 5 (A)	WD repeat-containing protein 3 homolog GN=wdr3 OS=Dictyostelium discoideum (Slime mold) PE=3 SV=1	PREDICTED: WD repeat-containing protein 43-like isoform X1 [Nasonia vitripennis]
c101830.graph_c0	6.69947e-20	-6.78896	down	Amino acid transport and metabolism	Molecular Function: carboxypeptidase activity (GO:0004180);; Molecular Function: metallopeptidase activity (GO:0008237);; Molecular Function: metal ion binding (GO:0046872);;	--	Carboxypeptidase B OS=Astacus astacus (Noble crayfish) PE=1 SV=1	PREDICTED: carboxypeptidase B-like [Nasonia vitripennis]
c101812.graph_c0	0.00236973	-3.34946	down	--	--	--	--	--
c101805.graph_c0	1.94006e-25	-10.3627	down	--	--	--	--	--
c101794.graph_c0	1.65508e-05	-3.13423	down	--	Biological Process: cell communication (GO:0007154);; Cellular Component: membrane (GO:0016020);; Biological Process: regulation of cellular process (GO:0050794);;	K09255|7.78528e-116|ame:406086|Dl, GB19066, GB19537, GB30211; dorsal; K09255 Rel/ankyrin family, other (A)	Embryonic polarity protein dorsal GN=dl OS=Drosophila melanogaster (Fruit fly) PE=1 SV=2	PREDICTED: putative transcription factor p65 homolog [Megachile rotundata]
c101773.graph_c0	0.00950427	-1.33636	down	--	--	--	--	PREDICTED: uncharacterized protein LOC100121715 [Nasonia vitripennis]
c101759.graph_c0	0.000135079	-1.78992	down	Carbohydrate transport and metabolism	Biological Process: carbohydrate metabolic process (GO:0005975);; Molecular Function: hydrolase activity (GO:0016787);; Molecular Function: cation binding (GO:0043169);;	K01187|1.61936e-76|nvi:100120914|maltase 1-like; K01187 alpha-glucosidase [EC:3.2.1.20] (A)	Maltase 1 (Precursor) GN=Mal-B1 OS=Drosophila virilis (Fruit fly) PE=3 SV=2	PREDICTED: maltase 1-like [Nasonia vitripennis]
c101730.graph_c0	0.00317811	3.20661	up	--	--	--	--	PREDICTED: microtubule-associated protein futsch-like [Nasonia vitripennis]
c101716.graph_c0	0.00190486	1.66916	up	--	--	--	--	--
c101704.graph_c0	1.34392e-12	-6.00636	down	--	Biological Process: metabolic process (GO:0008152);; Molecular Function: transferase activity (GO:0016740);;	K00665|3.06559e-116|nvi:100122083|fatty acid synthase-like; K00665 fatty acid synthase, animal type [EC:2.3.1.85] (A)	--	PREDICTED: fatty acid synthase-like [Nasonia vitripennis]
c101697.graph_c0	0.000572003	-6.39559	down	--	--	--	Protein roadkill GN=rdx OS=Drosophila melanogaster (Fruit fly) PE=1 SV=2	PREDICTED: speckle-type POZ protein A-like [Nasonia vitripennis]
c101695.graph_c0	0.004872	-1.49033	down	--	--	--	Tyrosine-protein phosphatase Lar (Precursor) GN=Lar OS=Drosophila melanogaster (Fruit fly) PE=1 SV=2	PREDICTED: netrin receptor DCC isoform X1 [Nasonia vitripennis]
c101690.graph_c0	0.00066191	1.64721	up	Inorganic ion transport and metabolism	--	--	Putative carbonic anhydrase 3 GN=cah-3 OS=Caenorhabditis elegans PE=3 SV=1	PREDICTED: carbonic anhydrase 1-like [Nasonia vitripennis]
c101688.graph_c2	0.000771656	1.70965	up	--	--	--	--	PREDICTED: uncharacterized protein LOC100870834 [Apis florea]
c101686.graph_c0	0.00310299	-1.73265	down	--	Biological Process: Wnt signaling pathway (GO:0016055);; Molecular Function: Wnt-protein binding (GO:0017147);;	--	Protein wntless {ECO:0000250|UniProtKB:Q95ST2} (Precursor) OS=Drosophila mojavensis (Fruit fly) PE=3 SV=1	PREDICTED: protein wntless [Nasonia vitripennis]
c101677.graph_c0	0.00506013	-1.90699	down	--	Biological Process: cell adhesion (GO:0007155);;	--	--	PREDICTED: muskelin [Nasonia vitripennis]
c101672.graph_c0	0.00265284	1.46581	up	Lipid transport and metabolism	Biological Process: fatty acid biosynthetic process (GO:0006633);; Cellular Component: integral component of membrane (GO:0016021);; Molecular Function: oxidoreductase activity, acting on paired donors, with oxidation of a pair of donors resulting in the reduction of molecular oxygen to two molecules of water (GO:0016717);; Biological Process: oxidation-reduction process (GO:0055114);;	K00507|0|nvi:100115081|acyl-CoA Delta(11) desaturase; K00507 stearoyl-CoA desaturase (delta-9 desaturase) [EC:1.14.19.1] (A)	Acyl-CoA Delta(11) desaturase OS=Spodoptera littoralis (Egyptian cotton leafworm) PE=1 SV=1	PREDICTED: acyl-CoA Delta(11) desaturase [Nasonia vitripennis]
c101670.graph_c0	0.00114282	3.79211	up	Function unknown	--	--	Venom allergen 5 (Fragment) OS=Pachycondyla chinensis (Asian needle ant) PE=2 SV=1	PREDICTED: enolase-phosphatase E1-like isoform X1 [Nasonia vitripennis]
c101634.graph_c0	0.00416953	1.51023	up	--	--	--	--	--
c101627.graph_c0	0.00878078	-2.72297	down	Secondary metabolites biosynthesis, transport and catabolism	--	K14999|0|nvi:100122639|CYP6CK8; cytochrome P450 6CK8; K14999 cytochrome P450, family 6 [EC:1.14.-.-] (A)	Probable cytochrome P450 6a14 GN=Cyp6a14 OS=Drosophila melanogaster (Fruit fly) PE=3 SV=2	cytochrome P450 6CK8 [Nasonia vitripennis]
c101623.graph_c0	0.0010958	-1.49504	down	--	--	K17973|0|nvi:100123105|N-alpha-acetyltransferase 25, NatB auxiliary subunit; K17973 N-terminal acetyltransferase B complex non-catalytic subunit (A)	Phagocyte signaling-impaired protein OS=Drosophila melanogaster (Fruit fly) PE=2 SV=1	PREDICTED: N-alpha-acetyltransferase 25, NatB auxiliary subunit [Nasonia vitripennis]
c101620.graph_c0	0.00126657	3.57609	up	--	--	--	--	--
c101619.graph_c0	0.00141257	1.55792	up	--	--	--	--	--
c101605.graph_c0	1.93831e-06	-2.13638	down	Amino acid transport and metabolism	Molecular Function: carboxy-lyase activity (GO:0016831);; Biological Process: carboxylic acid metabolic process (GO:0019752);; Molecular Function: pyridoxal phosphate binding (GO:0030170);;	K01634|0|nvi:100124107|sphingosine-1-phosphate lyase; K01634 sphinganine-1-phosphate aldolase [EC:4.1.2.27] (A)	Sphingosine-1-phosphate lyase GN=Sply OS=Drosophila melanogaster (Fruit fly) PE=2 SV=1	PREDICTED: sphingosine-1-phosphate lyase isoform X1 [Nasonia vitripennis]
c101588.graph_c0	0.00159764	3.80564	up	--	--	--	--	PREDICTED: uncharacterized protein LOC103315909 [Nasonia vitripennis]
c101562.graph_c0	8.20949e-09	-2.87033	down	General function prediction only	Biological Process: rRNA processing (GO:0006364);; Cellular Component: small-subunit processome (GO:0032040);;	K14554|0|nvi:100679400|WDR36; WD repeat-containing protein 36; K14554 U3 small nucleolar RNA-associated protein 21 (A)	Katanin p80 WD40 repeat-containing subunit B1 {ECO:0000255|HAMAP-Rule:MF_03022} OS=Strongylocentrotus purpuratus (Purple sea urchin) PE=1 SV=1	PREDICTED: WD repeat-containing protein 36 [Nasonia vitripennis]
c101550.graph_c1	1.60889e-31	-5.61364	down	--	--	K18728|5.403e-154|nvi:100679086|mediator of RNA polymerase II transcription subunit 12-like; K18728 eukaryotic translation initiation factor 4E transporter (A)	--	PREDICTED: mediator of RNA polymerase II transcription subunit 12-like isoform X5 [Nasonia vitripennis]
c101550.graph_c0	1.33316e-25	-5.16054	down	--	--	K18728|3.11447e-61|nvi:100679086|mediator of RNA polymerase II transcription subunit 12-like; K18728 eukaryotic translation initiation factor 4E transporter (A)	--	PREDICTED: mediator of RNA polymerase II transcription subunit 12-like isoform X1 [Nasonia vitripennis]
c101529.graph_c0	0.00107014	-1.88658	down	General function prediction only	Molecular Function: carboxylic ester hydrolase activity (GO:0004091);;	K13697|0|nvi:100117874|abhydrolase domain-containing protein 2; K13697 abhydrolase domain-containing protein 2 (A)	Abhydrolase domain-containing protein 2 GN=Hydr2 OS=Drosophila melanogaster (Fruit fly) PE=1 SV=2	PREDICTED: abhydrolase domain-containing protein 2 [Nasonia vitripennis]
c101512.graph_c1	0.00934326	1.72739	up	--	--	--	--	--
c101498.graph_c0	0.00136195	-2.06469	down	Nucleotide transport and metabolism	Molecular Function: ribonucleoside-diphosphate reductase activity, thioredoxin disulfide as acceptor (GO:0004748);; Molecular Function: ATP binding (GO:0005524);; Cellular Component: ribonucleoside-diphosphate reductase complex (GO:0005971);; Biological Process: DNA replication (GO:0006260);; Biological Process: oxidation-reduction process (GO:0055114);;	--	Ribonucleoside-diphosphate reductase large subunit GN=RnrL OS=Drosophila melanogaster (Fruit fly) PE=1 SV=2	PREDICTED: LOW QUALITY PROTEIN: ribonucleoside-diphosphate reductase large subunit [Nasonia vitripennis]
c101492.graph_c0	0.00144842	3.82229	up	--	--	--	--	--
c101488.graph_c0	1.59715e-43	-8.51705	down	--	--	--	--	PREDICTED: uncharacterized protein LOC100878637 [Megachile rotundata]
c101479.graph_c0	7.54235e-14	-8.30749	down	--	--	--	--	--
c101464.graph_c0	7.88997e-06	-2.30253	down	--	Molecular Function: zinc ion binding (GO:0008270);;	--	RING finger protein unkempt GN=unk OS=Drosophila melanogaster (Fruit fly) PE=1 SV=1	PREDICTED: putative E3 ubiquitin-protein ligase UNKL isoform X1 [Nasonia vitripennis]
c101458.graph_c0	0.00238774	-1.92045	down	Intracellular trafficking, secretion, and vesicular transport	Molecular Function: phospholipid binding (GO:0005543);; Molecular Function: ARF GTPase activator activity (GO:0008060);; Molecular Function: zinc ion binding (GO:0008270);; Biological Process: regulation of ARF GTPase activity (GO:0032312);;	--	Centaurin-gamma-1A GN=CenG1A OS=Drosophila melanogaster (Fruit fly) PE=2 SV=2	PREDICTED: arf-GAP with dual PH domain-containing protein 1-like [Nasonia vitripennis]
c101449.graph_c0	0.000497423	-3.78301	down	--	--	--	--	PREDICTED: telomerase reverse transcriptase-like [Nasonia vitripennis]
c101444.graph_c0	8.68464e-08	-6.39058	down	General function prediction only	--	--	Ankyrin repeat, PH and SEC7 domain containing protein secG GN=secG OS=Dictyostelium discoideum (Slime mold) PE=2 SV=1	PREDICTED: ankyrin-3-like [Nasonia vitripennis]
c101438.graph_c1	0.00618386	1.29553	up	General function prediction only	--	--	ADP-ribosylation factor-like protein 3 GN=arl-3 OS=Caenorhabditis elegans PE=1 SV=1	PREDICTED: uncharacterized protein LOC100124103 [Nasonia vitripennis]
c101434.graph_c0	0.00740997	-1.34707	down	Nucleotide transport and metabolism	Biological Process: G1/S transition of mitotic cell cycle (GO:0000082);; Biological Process: cell fate specification (GO:0001708);; Biological Process: cell fate determination (GO:0001709);; Biological Process: instar larval development (GO:0002168);; Molecular Function: GTPase activity (GO:0003924);; Molecular Function: IMP dehydrogenase activity (GO:0003938);; Molecular Function: protein bindin…	K00088|0|ame:550673|ras, GB16346; inosine-5'-monophosphate dehydrogenase; K00088 IMP dehydrogenase [EC:1.1.1.205] (A)	Inosine-5&apos;-monophosphate dehydrogenase {ECO:0000255|HAMAP-Rule:MF_03156} GN=ras OS=Drosophila melanogaster (Fruit fly) PE=1 SV=1	PREDICTED: inosine-5&apos;-monophosphate dehydrogenase-like isoform 1 [Megachile rotundata]
c101428.graph_c0	1.61707e-05	-3.33194	down	--	--	--	--	--
c101419.graph_c0	7.51629e-07	-3.15563	down	--	--	--	Probable histone-lysine N-methyltransferase Mes-4 GN=Mes-4 OS=Drosophila melanogaster (Fruit fly) PE=1 SV=2	PREDICTED: histone-lysine N-methyltransferase NSD2-like isoform X1 [Nasonia vitripennis]
c101398.graph_c2	1.9934e-12	-5.37841	down	Chromatin structure and dynamics	Cellular Component: nucleosome (GO:0000786);; Molecular Function: DNA binding (GO:0003677);; Cellular Component: nucleus (GO:0005634);; Biological Process: nucleosome assembly (GO:0006334);; Molecular Function: protein heterodimerization activity (GO:0046982);;	K11253|5.31638e-89|phi:102109710|histone H3.2-like; K11253 histone H3 (A)	Histone H3 OS=Urechis caupo (Innkeeper worm) PE=1 SV=2	hypothetical protein SINV_16114 [Solenopsis invicta]
c101397.graph_c0	2.28259e-16	-7.97836	down	--	--	--	--	PREDICTED: zinc finger protein 70-like [Nasonia vitripennis]
c101392.graph_c0	2.96935e-05	5.60407	up	--	--	--	--	PREDICTED: tetratricopeptide repeat protein 25-like isoform X1 [Nasonia vitripennis]
c101382.graph_c0	0.000423441	-8.12257	down	--	--	--	--	--
c101376.graph_c0	5.72836e-17	-9.90907	down	--	--	--	--	PREDICTED: uncharacterized protein LOC100679025 [Nasonia vitripennis]
c101375.graph_c0	0.00126824	-2.93145	down	--	--	--	--	--
c101371.graph_c0	0.00853992	-1.84337	down	--	--	K14570|6.17387e-113|nvi:100680126|RNA exonuclease 1 homolog; K14570 RNA exonuclease 1 [EC:3.1.-.-] (A)	--	PREDICTED: RNA exonuclease 1 homolog [Nasonia vitripennis]
c101370.graph_c0	2.44558e-07	-7.3772	down	--	--	--	--	PREDICTED: uncharacterized protein LOC100678819 isoform X2 [Nasonia vitripennis]
c101359.graph_c0	0.00388352	2.86943	up	--	--	--	--	--
c101340.graph_c0	0.000341796	-1.6119	down	--	Cellular Component: extracellular region (GO:0005576);; Biological Process: single-organism process (GO:0044699);;	--	Protein Wnt-2 (Precursor) GN=Wnt2 OS=Drosophila melanogaster (Fruit fly) PE=2 SV=2	PREDICTED: regulator of microtubule dynamics protein 1-like [Nasonia vitripennis]
c101335.graph_c0	0.00293202	-1.63069	down	General function prediction only	Molecular Function: Rab GTPase activator activity (GO:0005097);; Biological Process: positive regulation of Rab GTPase activity (GO:0032851);;	--	Ecotropic viral integration site 5 ortholog GN=Evi5 OS=Drosophila melanogaster (Fruit fly) PE=1 SV=3	PREDICTED: USP6 N-terminal-like protein isoform X1 [Nasonia vitripennis]
c101323.graph_c0	0.0049078	1.37147	up	--	--	--	--	--
c101321.graph_c0	0.00411652	3.093	up	--	--	--	--	--
c101318.graph_c1	0.00494785	-4.11551	down	--	--	--	--	--
c101316.graph_c0	0.00968787	-1.65834	down	Replication, recombination and repair	Molecular Function: organic cyclic compound binding (GO:0097159);; Molecular Function: heterocyclic compound binding (GO:1901363);;	--	--	ATPase family, AAA domain containing 5-like [Nasonia vitripennis]
c101314.graph_c0	2.50544e-11	Inf	up	--	Molecular Function: catalytic activity (GO:0003824);;	--	Venom serine protease Bi-VSP (Precursor) OS=Bombus ignitus (Bumblebee) PE=1 SV=1	serine protease [Nasonia vitripennis]
c101312.graph_c0	0.00932617	-1.79886	down	General function prediction only	--	K11790|0|nvi:100118766|protein lethal(2)denticleless-like; K11790 denticleless (A)	Protein lethal(2)denticleless GN=l(2)dtl OS=Drosophila melanogaster (Fruit fly) PE=1 SV=2	PREDICTED: protein lethal(2)denticleless-like [Nasonia vitripennis]
c101306.graph_c0	0.00186245	-3.26029	down	--	--	--	--	--
c101299.graph_c0	0.00387567	-1.60531	down	--	--	--	Ribosomal L1 domain-containing protein CG13096 GN=CG13096 OS=Drosophila melanogaster (Fruit fly) PE=1 SV=1	ankyrin repeat domain 40 [Nasonia vitripennis]
c101290.graph_c0	0.00071292	-1.99741	down	--	--	--	--	PREDICTED: uncharacterized protein LOC100680355 isoform X1 [Nasonia vitripennis]
c101289.graph_c0	0.00533021	-2.84682	down	Secondary metabolites biosynthesis, transport and catabolism	Molecular Function: NADPH:quinone reductase activity (GO:0003960);; Molecular Function: [acyl-carrier-protein] S-acetyltransferase activity (GO:0004313);; Molecular Function: 3-oxoacyl-[acyl-carrier-protein] reductase (NADPH) activity (GO:0004316);; Molecular Function: 3-hydroxypalmitoyl-[acyl-carrier-protein] dehydratase activity (GO:0004317);; Molecular Function: enoyl-[acyl-carrier-protein] re…	K00665|5.20697e-44|nvi:100122083|fatty acid synthase-like; K00665 fatty acid synthase, animal type [EC:2.3.1.85] (A)	Probable polyketide synthase 8/35 GN=pks35 OS=Dictyostelium discoideum (Slime mold) PE=3 SV=1	PREDICTED: fatty acid synthase-like [Nasonia vitripennis]
c101258.graph_c2	1.63083e-08	-5.31107	down	--	--	--	--	--
c101235.graph_c0	1.45688e-15	-9.54325	down	--	--	--	--	PREDICTED: probable serine/threonine-protein kinase DDB_G0282675 [Nasonia vitripennis]
c101211.graph_c0	0.000519915	2.50769	up	--	--	--	--	--
c101202.graph_c1	0.00469197	1.51313	up	--	--	--	--	--
c101196.graph_c0	0.000311994	-3.93324	down	--	--	K12386|3.99119e-74|nvi:100114326|uncharacterized LOC100114326; K12386 cystinosin (A)	--	PREDICTED: uncharacterized protein LOC100114326 [Nasonia vitripennis]
c101193.graph_c0	1.87494e-06	-2.1087	down	--	--	--	Lysozyme c-1 (Precursor) GN=AGAP007347 OS=Anopheles gambiae (African malaria mosquito) PE=2 SV=2	PREDICTED: lysozyme c-1-like [Nasonia vitripennis]
c101184.graph_c1	0.00713381	1.37625	up	--	--	--	--	--
c101165.graph_c0	3.48329e-08	-3.79882	down	--	--	K02605|0|nvi:100123111|origin recognition complex subunit 3; K02605 origin recognition complex subunit 3 (A)	Origin recognition complex subunit 3 GN=orcC OS=Dictyostelium discoideum (Slime mold) PE=3 SV=2	PREDICTED: origin recognition complex subunit 3 [Nasonia vitripennis]
c101134.graph_c0	0.000986158	1.80938	up	General function prediction only	Molecular Function: neurotransmitter:sodium symporter activity (GO:0005328);; Biological Process: neurotransmitter transport (GO:0006836);; Cellular Component: integral component of membrane (GO:0016021);;	K05034|0|nvi:100118467|sodium- and chloride-dependent GABA transporter 1-like; K05034 solute carrier family 6 (neurotransmitter transporter, GABA) member 1 (A)	Sodium-dependent serotonin transporter GN=SerT OS=Drosophila melanogaster (Fruit fly) PE=2 SV=1	PREDICTED: sodium- and chloride-dependent GABA transporter 1-like [Nasonia vitripennis]
c101129.graph_c0	8.05905e-06	-3.64287	down	Carbohydrate transport and metabolism	Molecular Function: hydrolase activity, hydrolyzing O-glycosyl compounds (GO:0004553);; Biological Process: carbohydrate metabolic process (GO:0005975);;	--	Neutral alpha-glucosidase AB (Precursor) GN=modA OS=Dictyostelium discoideum (Slime mold) PE=3 SV=1	PREDICTED: uncharacterized family 31 glucosidase KIAA1161 [Nasonia vitripennis]
c101118.graph_c1	6.13819e-06	-2.13586	down	--	--	--	Elongation of very long chain fatty acids protein AAEL008004 GN=AAEL008004 OS=Aedes aegypti (Yellowfever mosquito) PE=2 SV=2	PREDICTED: elongation of very long chain fatty acids protein AAEL008004-like [Nasonia vitripennis]
c101091.graph_c0	2.10022e-07	2.29115	up	Posttranslational modification, protein turnover, chaperones	Molecular Function: peptide-methionine (S)-S-oxide reductase activity (GO:0008113);; Biological Process: oxidation-reduction process (GO:0055114);;	K07304|1.73431e-103|ame:409097|MsrA, GB10196; methionine sulphoxide reductase A; K07304 peptide-methionine (S)-S-oxide reductase [EC:1.8.4.11] (A)	Peptide methionine sulfoxide reductase GN=Eip71CD OS=Drosophila melanogaster (Fruit fly) PE=2 SV=2	Peptide methionine sulfoxide reductase [Cerapachys biroi]
c101088.graph_c0	1.76373e-18	-8.87089	down	--	--	--	--	--
c101086.graph_c1	1.40326e-05	-2.38388	down	--	Molecular Function: protein serine/threonine kinase activity (GO:0004674);; Molecular Function: ATP binding (GO:0005524);; Biological Process: protein phosphorylation (GO:0006468);;	K08794|0|nvi:100117454|calcium/calmodulin-dependent protein kinase type 1; K08794 calcium/calmodulin-dependent protein kinase I [EC:2.7.11.17] (A)	Calcium/calmodulin-dependent protein kinase type 1 {ECO:0000250|UniProtKB:Q9TXJ0} GN=cmk-1 OS=Caenorhabditis briggsae PE=3 SV=3	PREDICTED: calcium/calmodulin-dependent protein kinase type 1 isoform X1 [Nasonia vitripennis]
c101063.graph_c0	0.000104485	6.51261	up	Amino acid transport and metabolism	--	--	Kynurenine--oxoglutarate transaminase GN=ccbl OS=Dictyostelium discoideum (Slime mold) PE=3 SV=1	PREDICTED: kynurenine--oxoglutarate transaminase 1-like isoform X1 [Nasonia vitripennis]
c101056.graph_c0	5.0877e-07	Inf	down	--	--	--	--	PREDICTED: inhibitor of growth protein 5 isoform X2 [Tribolium castaneum]
c101043.graph_c1	0.00139347	1.54251	up	--	--	--	Myosin heavy chain IB GN=MIB OS=Acanthamoeba castellanii (Amoeba) PE=1 SV=2	PREDICTED: FCH and double SH3 domains protein 2 isoform X1 [Nasonia vitripennis]
c101035.graph_c0	0.00441109	1.49283	up	--	--	--	--	--
c101031.graph_c0	0.0075433	-1.38266	down	--	Molecular Function: zinc ion binding (GO:0008270);;	--	PHD finger protein rhinoceros GN=rno OS=Drosophila melanogaster (Fruit fly) PE=1 SV=1	PREDICTED: PHD finger protein 14 isoform X2 [Nasonia vitripennis]
c101030.graph_c0	1.25644e-08	-2.54699	down	--	--	K12617|2.42686e-165|ame:411850|Patr-1, GB11832; protein associated with topo II related - 1; K12617 DNA topoisomerase 2-associated protein PAT1 (A)	--	PREDICTED: protein PAT1 homolog 1-like [Megachile rotundata]
c101003.graph_c0	1.79498e-11	-8.52658	down	--	Molecular Function: catalytic activity (GO:0003824);; Cellular Component: nucleus (GO:0005634);; Biological Process: transcription from RNA polymerase II promoter (GO:0006366);; Molecular Function: organic cyclic compound binding (GO:0097159);; Molecular Function: heterocyclic compound binding (GO:1901363);;	K03139|5.91049e-57|ame:551470|TfIIFbeta, GB10781; transcription factor TFIIFbeta; K03139 transcription initiation factor TFIIF subunit beta [EC:3.6.4.12] (A)	General transcription factor IIF subunit 2 GN=TfIIFbeta OS=Drosophila melanogaster (Fruit fly) PE=2 SV=2	PREDICTED: general transcription factor IIF subunit 2-like isoform X1 [Apis dorsata]
c101002.graph_c0	0.00141257	1.49316	up	--	--	--	Protein lev-9 (Precursor) GN=lev-9 OS=Caenorhabditis elegans PE=1 SV=3	PREDICTED: uncharacterized protein LOC100117599 [Nasonia vitripennis]
c100994.graph_c0	1.69146e-08	-2.52968	down	--	--	--	--	--
c100959.graph_c0	0.00156709	-6.33406	down	--	--	--	--	PREDICTED: uncharacterized protein LOC100680135 [Nasonia vitripennis]
c100945.graph_c0	0.000152453	-1.80605	down	--	Cellular Component: integral component of membrane (GO:0016021);;	--	--	PREDICTED: uncharacterized protein LOC105201845 isoform X1 [Solenopsis invicta]
c100941.graph_c0	0.000156536	-3.87932	down	--	--	--	Phospholipase A1 4 (Precursor; Fragment) OS=Polistes dominula (European paper wasp) PE=2 SV=1	PREDICTED: uncharacterized protein LOC103316427 [Nasonia vitripennis]
c100906.graph_c0	6.51267e-07	-2.75259	down	--	--	K18749|1.18731e-67|nvi:100121988|protein LSM14 homolog B-like; K18749 protein LSM14 (A)	--	PREDICTED: protein LSM14 homolog A-like isoform X4 [Nasonia vitripennis]
c100897.graph_c1	0.00449371	-3.15361	down	--	--	--	--	Large proline-rich protein BAT2 [Camponotus floridanus]
c100883.graph_c0	0.00818423	-2.82613	down	--	--	--	Putative ATP-dependent RNA helicase TDRD12 GN=TDRD12 OS=Bombyx mori (Silk moth) PE=1 SV=2	PREDICTED: putative ATP-dependent RNA helicase TDRD12 isoform X1 [Nasonia vitripennis]
c100880.graph_c3	0.000207014	-2.02414	down	--	--	--	Esterase E4 (Precursor) OS=Myzus persicae (Green peach aphid) PE=1 SV=1	PREDICTED: LOW QUALITY PROTEIN: esterase E4-like [Nasonia vitripennis]
c100880.graph_c0	2.03287e-05	-1.99792	down	Lipid transport and metabolism	--	--	Esterase FE4 (Precursor) OS=Myzus persicae (Green peach aphid) PE=1 SV=1	PREDICTED: LOW QUALITY PROTEIN: esterase E4-like [Nasonia vitripennis]
c100875.graph_c2	0.00910673	2.58304	up	--	--	--	--	--
c100800.graph_c1	5.70144e-05	2.13136	up	Amino acid transport and metabolism	Molecular Function: aspartate 1-decarboxylase activity (GO:0004068);; Biological Process: carboxylic acid metabolic process (GO:0019752);; Molecular Function: pyridoxal phosphate binding (GO:0030170);;	K01580|0|nvi:100122545|cysteine sulfinic acid decarboxylase; K01580 glutamate decarboxylase [EC:4.1.1.15] (A)	Glutamate decarboxylase GN=Gad1 OS=Drosophila melanogaster (Fruit fly) PE=2 SV=2	PREDICTED: cysteine sulfinic acid decarboxylase [Nasonia vitripennis]
c100794.graph_c0	5.07676e-06	-4.86919	down	--	--	--	--	--
c100761.graph_c2	0.000223859	-1.93757	down	--	--	--	--	PREDICTED: uncharacterized protein LOC100118088 [Nasonia vitripennis]
c100752.graph_c1	0.00878078	2.86056	up	--	--	--	--	--
c100752.graph_c0	3.63875e-07	2.35455	up	--	--	--	Brain peptide GYPYQHRLVY (Precursor) OS=Apis mellifera (Honeybee) PE=1 SV=1	PREDICTED: prohormone-2-like [Nasonia vitripennis]
c100738.graph_c0	0.00325101	3.388	up	--	--	--	--	PREDICTED: uncharacterized protein LOC103316058 isoform X1 [Nasonia vitripennis]
c100727.graph_c0	0.00421862	1.56129	up	Energy production and conversion	Biological Process: dicarboxylic acid transport (GO:0006835);; Cellular Component: membrane (GO:0016020);; Molecular Function: sodium:dicarboxylate symporter activity (GO:0017153);;	K05613|0|nvi:100118726|excitatory amino acid transporter-like; K05613 solute carrier family 1 (glial high affinity glutamate transporter), member 2 (A)	Excitatory amino acid transporter GN=glt-1 OS=Caenorhabditis elegans PE=1 SV=2	PREDICTED: excitatory amino acid transporter-like [Nasonia vitripennis]
c100716.graph_c1	0.000906364	-3.06745	down	--	--	--	Lysosomal aspartic protease (Precursor) GN=AAEL006169 OS=Aedes aegypti (Yellowfever mosquito) PE=1 SV=2	PREDICTED: lysosomal aspartic protease-like [Nasonia vitripennis]
c100704.graph_c0	7.35825e-09	Inf	down	--	--	--	--	PREDICTED: uncharacterized protein LOC105217475 [Bactrocera cucurbitae]
c100679.graph_c0	0.00421862	-2.03119	down	--	Molecular Function: metal ion binding (GO:0046872);;	K13149|2.45733e-82|nvi:100119009|Ints12; integrator complex subunit 12; K13149 integrator complex subunit 12 (A)	--	integrator complex subunit 12 [Nasonia vitripennis]
c100676.graph_c0	9.36957e-05	2.00078	up	--	--	--	--	--
c100650.graph_c2	0.00568051	1.51166	up	--	--	--	--	--
c100635.graph_c0	0.000800746	1.84367	up	--	Molecular Function: hydrolase activity (GO:0016787);;	--	Venom serine protease Bi-VSP (Precursor) OS=Bombus ignitus (Bumblebee) PE=1 SV=1	PREDICTED: venom protease [Nasonia vitripennis]
c100626.graph_c0	7.41943e-05	-3.0665	down	--	Molecular Function: protein serine/threonine kinase activity (GO:0004674);; Molecular Function: ATP binding (GO:0005524);; Biological Process: protein phosphorylation (GO:0006468);; Biological Process: cell division (GO:0051301);;	K02503|6.51246e-177|ame:408406|Cdk4, GB16688; cyclin-dependent kinase 4; K02503 histidine triad (HIT) family protein (A)	Cyclin-dependent kinase 5 homolog GN=cdk5 OS=Dictyostelium discoideum (Slime mold) PE=2 SV=2	PREDICTED: cyclin-dependent kinase 6 isoform X2 [Apis mellifera]
c100598.graph_c0	0.00232565	2.22182	up	--	--	--	--	PREDICTED: uncharacterized protein LOC100868246 [Apis florea]
c100595.graph_c0	0.0028348	-1.7668	down	--	--	--	--	PREDICTED: uncharacterized protein LOC105200176 [Solenopsis invicta]
c100576.graph_c1	7.49369e-05	-4.76034	down	--	--	--	--	PREDICTED: uncharacterized protein LOC100678751 [Nasonia vitripennis]
c100539.graph_c0	6.72382e-06	Inf	up	--	--	--	--	PREDICTED: uncharacterized protein LOC100678849 isoform X1 [Nasonia vitripennis]
c100533.graph_c1	0.0004355	Inf	down	--	--	--	--	--
c100533.graph_c0	4.51723e-09	Inf	down	--	--	--	--	--
c100525.graph_c0	3.88685e-18	-10.5898	down	--	--	--	--	--
c100517.graph_c0	0.00107126	-1.89773	down	--	Cellular Component: core TFIIH complex (GO:0000439);; Molecular Function: ATP-dependent DNA helicase activity (GO:0004003);; Biological Process: nucleotide-excision repair (GO:0006289);;	K03144|0|nvi:100118816|general transcription factor IIH subunit 4; K03144 transcription initiation factor TFIIH subunit 4 (A)	Cyclin-C GN=CycC OS=Anopheles gambiae (African malaria mosquito) PE=3 SV=2	PREDICTED: general transcription factor IIH subunit 4 isoform X1 [Nasonia vitripennis]
c100511.graph_c1	8.19001e-13	-4.75141	down	--	Molecular Function: GTP binding (GO:0005525);; Cellular Component: intracellular (GO:0005622);; Biological Process: small GTPase mediated signal transduction (GO:0007264);;	--	Protein distal antenna {ECO:0000250|UniProtKB:Q29CW2} OS=Aedes aegypti (Yellowfever mosquito) PE=3 SV=2	PREDICTED: ADP-ribosylation factor-like protein 16 [Nasonia vitripennis]
c100506.graph_c0	1.39142e-14	-5.23277	down	Function unknown	Molecular Function: nucleic acid binding (GO:0003676);; Biological Process: RNA modification (GO:0009451);;	K06176|0|nvi:100119445|pseudouridylate synthase 7 homolog; K06176 tRNA pseudouridine13 synthase [EC:5.4.99.27] (A)	Putative pseudouridine synthase B0024.11 GN=B0024.11 OS=Caenorhabditis elegans PE=3 SV=1	PREDICTED: pseudouridylate synthase 7 homolog [Nasonia vitripennis]
c100505.graph_c0	0.00812945	1.40265	up	--	--	--	--	--
c100503.graph_c0	0.00360282	1.78089	up	--	--	--	Brain peptide SYWKQCAFNAVSCF-amide (Precursor) OS=Apis mellifera (Honeybee) PE=1 SV=1	PREDICTED: prohormone-1 [Nasonia vitripennis]
c100489.graph_c1	3.3781e-18	-7.20702	down	--	Cellular Component: membrane (GO:0016020);;	--	Lachesin (Precursor) GN=LAC OS=Schistocerca americana (American grasshopper) PE=1 SV=1	PREDICTED: lachesin-like isoform X2 [Nasonia vitripennis]
c100489.graph_c0	0.00123589	-4.52646	down	--	--	--	--	PREDICTED: lachesin-like isoform X1 [Nasonia vitripennis]
c100479.graph_c0	7.85748e-09	6.83411	up	--	--	--	--	PREDICTED: uncharacterized protein LOC100680268 [Nasonia vitripennis]
c100467.graph_c0	0.00430091	-3.22709	down	General function prediction only	--	--	Protein snail GN=sna OS=Drosophila melanogaster (Fruit fly) PE=1 SV=2	PREDICTED: zinc finger protein 32 [Nasonia vitripennis]
c100437.graph_c0	2.41211e-05	-2.76711	down	--	--	--	--	PREDICTED: uncharacterized protein LOC100114502 [Nasonia vitripennis]
c100431.graph_c0	0.00696594	-2.15934	down	--	Molecular Function: cytoskeletal protein binding (GO:0008092);; Biological Process: single-organism cellular process (GO:0044763);;	--	--	PREDICTED: MTSS1-like protein isoform X1 [Nasonia vitripennis]
c100430.graph_c0	0.00848074	1.29496	up	--	--	--	--	--
c100405.graph_c0	9.45256e-05	-4.54281	down	--	--	--	Phospholipase A1 OS=Vespula germanica (German yellow jacket) PE=2 SV=1	PREDICTED: uncharacterized protein LOC103316427 [Nasonia vitripennis]
c100354.graph_c0	6.33925e-05	4.50214	up	--	--	--	--	PREDICTED: uncharacterized protein LOC100120767 [Nasonia vitripennis]
c100350.graph_c0	0.00238208	-3.3883	down	--	--	--	--	PREDICTED: micronuclear linker histone polyprotein-like [Nasonia vitripennis]
c100320.graph_c0	4.77508e-05	-1.80242	down	Lipid transport and metabolism	Molecular Function: catalytic activity (GO:0003824);; Biological Process: metabolic process (GO:0008152);;	K07511|2.88189e-128|aag:AaeL_AAEL003993|cyclohex-1-ene-1-carboxyl-CoA hydratase, putative; K07511 enoyl-CoA hydratase [EC:4.2.1.17] (A)	Probable enoyl-CoA hydratase, mitochondrial GN=ech-6 OS=Caenorhabditis elegans PE=1 SV=1	PREDICTED: probable enoyl-CoA hydratase, mitochondrial-like [Megachile rotundata]
c100296.graph_c2	0.0030807	1.48095	up	--	--	--	--	--
c100293.graph_c1	0.00167955	-1.87575	down	General function prediction only	--	K14962|8.73133e-148|nvi:100120675|WD repeat-containing protein 82; K14962 COMPASS component SWD2 (A)	WD repeat-containing protein 82 {ECO:0000250|UniProtKB:Q6UXN9} OS=Drosophila melanogaster (Fruit fly) PE=1 SV=1	PREDICTED: WD repeat-containing protein 82 [Nasonia vitripennis]
c100293.graph_c0	0.000149682	-1.92185	down	General function prediction only	--	K14962|4.19897e-68|nvi:100120675|WD repeat-containing protein 82; K14962 COMPASS component SWD2 (A)	WD repeat-containing protein 82 {ECO:0000250|UniProtKB:Q6UXN9} OS=Drosophila melanogaster (Fruit fly) PE=1 SV=1	PREDICTED: WD repeat-containing protein 82 [Nasonia vitripennis]
c100280.graph_c0	7.28393e-09	-6.25654	down	--	--	--	--	--
c100266.graph_c0	0.00652424	1.64855	up	--	--	--	Myosuppressin (Precursor) OS=Apis mellifera (Honeybee) PE=1 SV=1	PREDICTED: myosuppressin [Nasonia vitripennis]
c100263.graph_c1	0.00224516	-5.36128	down	--	--	K15001|4.55622e-107|nvi:100117726|CYP4AB12; cytochrome P450 4AB12; K15001 cytochrome P450, family 4 [EC:1.14.-.-] (A)	Cytochrome P450 4C1 GN=CYP4C1 OS=Blaberus discoidalis (Tropical cockroach) PE=2 SV=1	cytochrome P450 4AB12 precursor [Nasonia vitripennis]
c100220.graph_c0	0.00398951	1.90076	up	--	--	--	--	--
c100212.graph_c1	0.00104352	1.5842	up	--	--	--	--	--
c100204.graph_c0	0.00276274	-3.79681	down	--	--	--	--	PREDICTED: UPF0544 protein C5orf45 homolog [Nasonia vitripennis]
c100182.graph_c0	2.13431e-32	-6.2446	down	Secondary metabolites biosynthesis, transport and catabolism	Molecular Function: zinc ion binding (GO:0008270);; Biological Process: biosynthetic process (GO:0009058);; Molecular Function: oxidoreductase activity (GO:0016491);; Molecular Function: transferase activity, transferring acyl groups other than amino-acyl groups (GO:0016747);; Molecular Function: hydrolase activity, acting on ester bonds (GO:0016788);; Biological Process: oxidation-reduction proc…	K00665|4.41859e-106|nvi:100122083|fatty acid synthase-like; K00665 fatty acid synthase, animal type [EC:2.3.1.85] (A)	Chalcone synthase stlB GN=stlB OS=Dictyostelium discoideum (Slime mold) PE=2 SV=1	PREDICTED: fatty acid synthase-like [Nasonia vitripennis]
c100120.graph_c0	5.37116e-26	-8.45351	down	--	--	--	--	PREDICTED: putative leucine-rich repeat-containing protein DDB_G0290503 [Nasonia vitripennis]
c100106.graph_c3	5.1126e-07	Inf	down	--	--	--	--	endonuclease-like venom protein precursor [Nasonia vitripennis]
c100083.graph_c0	0.000264891	-4.30922	down	--	--	--	--	--
c100078.graph_c0	3.38779e-06	6.18266	up	--	Cellular Component: mitochondrial inner membrane (GO:0005743);; Molecular Function: oxidoreductase activity (GO:0016491);;	--	Probable cytochrome c oxidase subunit 6A, mitochondrial (Precursor) GN=tag-174 OS=Caenorhabditis elegans PE=3 SV=1	PREDICTED: NF-X1-type zinc finger protein NFXL1-like [Nasonia vitripennis]
c100060.graph_c1	2.71314e-05	-2.13518	down	--	--	--	--	PREDICTED: protein CREG1-like [Nasonia vitripennis]
c100026.graph_c0	2.91019e-06	-4.76806	down	Secondary metabolites biosynthesis, transport and catabolism	Molecular Function: zinc ion binding (GO:0008270);; Biological Process: biosynthetic process (GO:0009058);; Molecular Function: oxidoreductase activity (GO:0016491);; Molecular Function: transferase activity, transferring acyl groups other than amino-acyl groups (GO:0016747);; Molecular Function: hydrolase activity, acting on ester bonds (GO:0016788);; Biological Process: oxidation-reduction proc…	K00665|3.60546e-85|nvi:100122083|fatty acid synthase-like; K00665 fatty acid synthase, animal type [EC:2.3.1.85] (A)	--	PREDICTED: fatty acid synthase-like [Nasonia vitripennis]
c100022.graph_c0	0.00310299	-4.97927	down	--	--	K09108|0|nvi:100679356|uncharacterized LOC100679356; K09108 transcription factor AP-4 (A)	Helix-loop-helix protein 11 GN=hlh-11 OS=Caenorhabditis elegans PE=3 SV=3	PREDICTED: uncharacterized protein LOC100679356 [Nasonia vitripennis]
